# Supplementary material for: Temperament and character in an Australian sample: examining cross-sectional associations of personality with age, sex, and satisfaction with life
Source: PeerJ. 2023 May 11;11:e15342. doi: 10.7717/peerj.15342 (PMC10183160; doi:10.7717/peerj.15342)
Supplement: Data S1 [file peerj-11-15342-s003.xlsx]

## Sheet: Demo + TCIR140
sex	YoB	age	grp	marital	rural	education	status	TCI-Q1
2	1989	25	1	1	3	2	1	5	1	4	4	4	2	5	1	1	5	2	4	5	5	5	4	5	1	4	5	3	1	5	5	4	2	5	4	4	5	2	2	5	4	4	4	5	1	2	2	5	4
2	1991	23	1	2	1	2	1	5	1	4	1	5	5	5	5	1	5	1	5	2	5	5	1	5	5	1	1	1	5	5	5	4	1	1	2	5	1	1	1	3	5	5	4	5	1	5	1	2	3
2	1979	35	2	1	1	3	1	5	3	4	5	5	4	5	2	3	5	1	4	5	4	5	2	4	4	2	2	5	1	5	5	4	2	1	4	4	2	4	4	4	4	3	4	4	2	5	5	3	5
2	1991	23	1	1	1	4	1	5	5	3	4	4	5	4	2	5	4	3	5	4	4	3	2	4	3	4	4	3	4	4	4	4	5	4	5	5	5	4	5	5	3	4	4	5	4	5	4	4	5
2	1984	30	1	1	1	3	2	4	2	4	3	5	3	4	3	3	4	4	4	5	4	4	2	3	3	4	5	5	5	5	5	5	4	5	4	3	2	2	1	5	3	4	4	3	2	4	5	5	4
2	1984	30	1	1	3	3	3	4	2	4	3	5	3	4	3	3	4	4	4	5	4	4	2	3	3	4	5	5	5	5	5	5	4	5	4	3	2	2	1	5	3	4	4	3	2	4	5	5	4
1	1996	18	1	1	2	4	1	5	4	4	4	4	3	5	4	2	4	2	4	5	4	2	1	5	3	4	3	2	4	4	4	4	4	5	4	4	2	4	1	4	5	4	4	3	2	5	4	4	2
2	1988	26	1	1	1	2	1	4	1	4	5	4	3	4	2	2	4	2	4	4	5	2	2	2	2	2	5	1	3	4	4	5	1	2	4	1	1	2	1	2	4	4	4	4	2	2	2	5	1
2	1995	19	1	2	2	4	1	4	2	2	4	3	1	5	4	2	4	4	2	4	5	1	3	4	4	4	4	1	3	2	4	2	5	5	4	1	4	4	3	4	2	3	4	5	4	5	4	5	3
2	1978	36	2	2	2	4	2	2	2	4	4	5	4	5	5	2	3	2	4	5	5	5	2	5	5	2	5	1	4	5	5	4	5	4	4	1	1	4	4	5	5	1	4	1	2	5	4	3	1
2	1978	36	2	2	4	1	1	2	2	4	4	5	4	5	5	2	3	2	4	5	5	5	2	5	5	2	5	1	4	5	5	4	5	4	4	1	1	4	4	5	5	1	4	1	2	5	4	3	1
2	1991	23	1	2	2	2	1	4	4	4	4	4	4	4	3	4	5	2	4	5	4	2	4	3	4	2	4	1	4	4	5	5	2	2	2	5	4	3	2	4	4	4	4	5	2	4	4	4	5
1	1970	44	2	2	1	4	1	5	2	3	5	4	5	4	3	1	4	1	4	5	5	4	1	4	4	1	2	4	5	4	4	5	1	3	4	5	1	5	3	5	4	3	4	4	1	5	4	4	5
2	1995	19	1	2	1	1	2	4	4	3	5	2	3	4	2	4	3	3	3	5	4	4	5	4	4	2	4	1	2	4	5	4	2	5	4	3	3	5	2	5	4	1	4	4	5	4	4	4	4
2	1996	18	1	1	4	1	1	4	4	3	5	1	2	4	4	5	4	1	2	5	5	4	5	4	4	1	3	4	2	4	5	4	2	2	4	2	2	4	3	4	4	2	4	3	4	5	5	4	3
2	1996	18	1	2	1	4	2	4	4	3	5	1	2	4	4	5	4	1	2	5	5	4	5	4	4	1	3	4	2	4	5	4	2	2	4	2	2	4	3	4	4	2	4	3	4	5	5	4	3
2	1976	38	2	2	2	2	1	4	3	3	4	4	3	5	3	2	4	2	4	4	4	5	3	2	3	3	3	1	4	4	5	5	3	3	3	3	2	3	2	4	4	4	4	5	3	5	5	5	3
2	1992	22	1	2	1	3	1	5	2	4	4	1	3	2	4	2	5	2	4	5	2	1	3	5	4	1	2	1	4	2	5	3	4	1	5	4	4	1	1	3	5	5	4	5	2	4	2	5	1
2	1947	67	3	1	2	2		5	2	2	5	4	2	5	4	2	4	2	2	4	2	4	4	2	3	2	4	3	4	4	4	4	2	4	4	4	4	4	4	2	4	3	4	2	2	5	4	4	3
1	1995	19	1	1	1	4	1	5	2	4	5	4	2	5	4	1	2	2	4	4	4	4	2	3	4	1	4	2	5	5	5	4	2	2	4	4	2	3	1	2	2	5	4	5	1	4	4	4	5
2	1992	22	1	2	1	2		5	1	3	4	5	5	4	4	3	4	2	5	5	4	4	3	2	3	2	3	4	4	4	3	5	2	4	3	5	1	4	4	2	4	4	4	5	2	5	2	4	4
2	1978	36	2	1	2	2	1	5	2	5	5	5	5	5	5	2	3	2	3	5	5	4	1	5	5	1	4	3	5	5	3	5	3	4	4	4	3	2	1	5	5	5	4	5	1	5	4	5	4
2	1985	29	1	2	1	1	2	5	1	4	4	4	5	4	3	2	3	4	3	5	5	5	1	5	5	1	2	5	5	5	3	4	3	3	4	4	2	4	4	5	4	4	4	5	3	5	4	5	3
2	1985	29	1	1	1	3	3	5	1	4	4	4	5	4	3	2	3	4	3	5	5	5	1	5	5	1	2	5	5	5	3	4	3	3	4	4	2	4	4	5	4	4	4	5	3	5	4	5	3
2	1995	19	1	2	1	4	1	3	2	4	4	3	4	4	4	3	4	2	3	4	3	5	4	3	4	2	4	3	2	3	5	4	3	4	2	2	3	4	4	2	4	3	4	2	4	5	3	4	5
2	1984	30	1	2	1	1	1	4	2	1	3	4	1	5	5	5	5	2	4	5	4	2	4	4	1	5	5	1	2	4	5	5	4	4	4	5	5	4	2	2	3	4	4	4	2	4	4	4	5
2	1963	51	2	1	1	1	2	3	2	5	4	3	2	5	2	1	4	4	3	5	4	5	1	3	4	1	5	1	3	4	1	4	5	3	3	4	2	3	2	5	3	3	4	2	2	5	4	3	4
2	1963	51	2	1	1	2	2	3	2	5	4	3	2	5	2	1	4	4	3	5	4	5	1	3	4	1	5	1	3	4	1	4	5	3	3	4	2	3	2	5	3	3	4	2	2	5	4	3	4
2	1967	47	2	2	1	1	2	4	1	5	4	5	5	5	3	1	4	2	1	5	2	3	2	5	5	3	2	5	5	5	5	4	4	5	5	1	3	1	1	4	5	4	4	4	2	5	5	5	2
2	1967	47	2	1	1	1	1	4	1	5	4	5	5	5	3	1	4	2	1	5	2	3	2	5	5	3	2	5	5	5	5	4	4	5	5	1	3	1	1	4	5	4	4	4	2	5	5	5	2
2	1995	19	1	1	2	4	1	5	1	5	4	2	5	4	2	1	4	2	4	5	5	5	2	4	5	1	4	2	2	5	2	5	5	3	2	4	2	1	5	2	4	5	4	5	2	5	2	5	1
2	1992	22	1	1	1	2	1	5	2	3	4	4	4	5	4	1	4	4	4	5	4	5	2	4	5	3	4	3	3	4	2	3	4	4	3	3	1	4	2	3	5	3	4	4	3	5	4	4	4
2	1993	21	1	2	1	3	1	4	2	3	5	5	5	4	4	4	4	1	4	3	5	4	4	3	3	2	4	4	1	2	4	3	5	5	4	3	4	4	4	1	2	3	4	4	4	5	1	3	3
2	1960	54	2	1	1	4		4	2	3	5	5	4	4	4	2	4	4	3	5	4	4	2	4	5	1	4	5	4	4	4	4	2	3	4	3	2	4	2	4	4	3	4	3	2	4	4	4	1
2	1981	33	2	1	4	1	1	5	1	4	5	5	5	4	4	1	5	2	4	5	5	2	4	4	4	2	3	2	4	4	4	5	2	4	5	3	2	4	4	5	2	5	4	5	1	5	4	4
1	1991	23	1	2	2	4	1	5	2	3	2	4	3	3	4	2	4	2	2	5	2	2	1	2	4	2	4	1	4	4	4	4	2	2	3	2	2	3	4	4	4	4	4	4	3	4	4	4	2
2	1973	41	2	2	1	4	1	4	4	3	4	4	3	4	4	3	4	2	3	5	4	3	3	4	4	3	4	2	1	4	5	4	3	2	3	2	2	3	4	2	3	2	4	2	2	5	2	3	3
2	1988	26	1	1	2	3	1	3	4	2	4	4	3	4	3	5	4	2	4	2	4	4	4	2	2	4	4	2	4	2	4	3	4	2	2	4	5	4	2	2	3	3	4	3	3	5	3	5	3
2	1981	33	2	1	1	4	2	5	1	4	5	5	5	4	4	1	5	2	4	5	5	2	4	4	4	2	3	2	4	4	4	5	2	4	5	3	2	4	4	5	2	5	4	5	1	5	4	4	3
2	1968	46	2	1	2	2	1	5	2	4	4	4	4	5	2	1	5	1	5	5	4	3	2	4	4	2	3	3	4	5	3	4	2	4	4	3	2	2	2	4	4	4	4	2	2	4	4	4	3
2	1952	62	3	1	2	2	2	4	1	5	5	4	5	4	4	1	4	3	3	5	3	4	2	5	5	1	4	5	3	5	4	3	4	4	4	1	1	1	4	3	4	3	4	4	3	5	2	3	1
2	1954	60	3	1	1	2		4	2	5	5	4	5	5	4	1	5	2	5	5	5	4	3	5	5	1	2	5	2	5	1	5	2	2	5	4	1	5	5	4	3	4	4	2	3	5	5	4	4
2	1976	38	2	1	1	1	1	5	2	3	5		4	5	4	2	4	4	4	4	5	5	1	3	5	1	5	4	5	4	1	5	4	5	4	3	2	2	4	4	4	4	4	4	2	4	4	4	4
2	1995	19	1	2	1	2	3	4	1	3	4	3	2	4	3	4	5	1	3	4	4	4	4	4	2	2	2	1	3	3	5	4	1	1	1	4	2	4	1	1	3	3	4	4	2	3	2	4	2
2	1993	21	1	2	2	2	1	4	2	5	4	3	4	4	3	1	4	4	3	5	4	3	3	4	4	1	4	3	3	4	4	4	3	4	4	4	1	3	4	4	4	3	4	3	3	5	4	5	4
1	1956	58	3	1	1	2		3	2	4	4	5	4	5	3	2	4	3	4	5	3	2	2	4	3	4	4	4	4	4	3	5	4	3	4	3	4	2	2	5	5	4	4	3	3	5	4	3	4
2	1953	61	3	1	2	1		4	4	4	4	4	4	4	2	2	4	2	2	4	4	2	2	2	5	4	4	2	2	4	4	4	4	4	2	4	2	2	4	4	4	3	4	4	2	4	4	4	2
1	1979	35	2	1	1	2	2	4	2	5	4	5	5	4	4	2	4	3	5	5	4	4	1	5	5	2	3	5	5	4	2	5	3	5	3	5	2	1	5	4	5	5	4	4	2	5	1	4	5
2	1996	18	1	2	1	2	1	5	2	5	5	4		4	4	1	2	4	4	5	2	4	1	3	5	1	5	3	4	4	4	5	4	2	5	4	4	4	2	4	4	4	4	4	3	5	4	5	2
1	1958	56	3	1	1	3		4	2	5	4	3	4	5	4	1	5	2	3	5	5	5	3	4	4	1	5	2	3	4	4	2	2	2	3	1	1	4	1	2	4	2	4	4	2	4	2	4	2
2	1995	19	1	1	1	4	1	4	2	2	4	5	2	4	5	4	4	3	3	4	3	4	3	3	4	2	4	1	4	3	4	4	4	3	2	1	1	3	2	2	2	4	4	4	2	4	3	4	3
2	1969	45	2	1	2	3		4	2	4	4	4	5	4	4	3	4	2	4	4	4	1	2	2	4	2	4	4	4	4	4	4	4	4	4	4	3	4	1	4	4	3	4	3	2	4	4	4	2
2	1991	23	1	1	1	2	2	3	1	5	2	4	4	4	4	4	2	1	4	5	2	5	4	5	4	3	1	4	4	4	3	3	1	2	3	2	5	2	2	5	5	3	4	4	4	4	1	3	1
2	1991	23	1	1	2	1	1	3	1	5	2	4	4	4	4	4	2	1	4	5	2	5	4	5	4	3	1	4	4	4	3	3	1	2	3	2	5	2	2	5	5	3	4	4	4	4	1	3	1
2	1977	37	2	1	1	1	2	4	2	5	5	4	5	3	3	1	3	3	3	5	5	4	1	5	4	1	2	5	1	5	4	4	2	4	4	2	2	1	4	3	5	4	4	4	3	4	3	3	4
1	1989	25	1	1	1	2	1	4	3	4	4	5	4	4	4	2	4	2	2	2	4	5	2	4	4	1	3	4	2	4	4	5	2	3	4	1	2	2	2	2	4	5	4	4	2	4	2	3	4
2	1995	19	1	2	1	2	1	4	1	4	4	3	5	5	3	1	4	4	3	4	3	5	1	5	5	2	5	2	4	3	4	4	4	4	4	4	4	5	3	4	5	4	4	5	1	5	5	5	4
2	1994	20	1	1	2	2	1	4	5	4	4	5	3	5	4	5	1	5	4	5	4	4	4	4	5	5	4	4	3	5	4	1	3	5	5	2	5	4	4	4	5	5	4	4	5	5	5	5	4
1	1997	17	1	2	1	4	1	4	2	2	4	4	2	4	3		4	1	2	5	3	4	4	3	3	2	4	1	3	4	5	4		2	2	1	2	3	3	1	3	5	4	4	2	4	2	4	4
	1973	41	2	1	2	3	1	4	2	4	4	4	4	4	4	3	2	3	3	5	5	4	2	4		2	3	5	3	5	3	3	5	5	4	2	1	3	5	5	3	4	4	4	4	5	4	4	4
2	1967	47	2	1	3	1	1	4	3	4	4	4	4	4	4	4	3	3	4	4	2	2	2	4	4	3	4	4	4	4	4	4	3	4	4	3	4	4	3	4	3	4	4	2	3	4	4	4	3
2	1995	19	1	2	1	2	1	3	1	2	4	2	3	4	2	4	4	2	4	5	2	5	2	4	4	1	5	1	2	5	4	4	2	2	1	1	1	4	4	2	4	4	4	5	2	1	1	4	3
2	1953	61	3	2	1	3		5	2	4	3	4	2	4	5	5	3	4	2	4	4	5	1	2	2	5	4	4	4	5	1	2	5	4	5	4	4	2	3	5	4	4	4	3	3	4	4	2	2
2	1981	33	2	1	2	1	2	4	2	3	4	5	1	4	3	4	4	2	5	5	4	4	1	4	3	2	3	2	4	4	4	5	2	3	2	5	3	4	2	4	3	4	4	5	2	5	5	4	5
2	1981	33	2	2	1	1	1	4	2	3	4	5	1	4	3	4	4	2	5	5	4	4	1	4	3	2	3	2	4	4	4	5	2	3	2	5	3	4	2	4	3	4	4	5	2	5	5	4	5
2	1967	47	2	1	1	3	2	4	3	4	4	4	4	4	4	4	3	3	4	4	2	2	2	4	4	3	4	4	4	4	4	4	3	4	4	3	4	4	3	4	3	4	4	2	3	4	4	4	3
2	1987	27	1	2	1	2	1	4	2	3	4	4	2	4	2	2	5	2	4	5	4	5	4	3	4	3	3	3	4	4	1	4	2	4	4	4	3	5	2	5	4	2	4	2	3	5	5	4	4
1	1982	32	2	1	1	1	1	5	3	3	5	4	4	5	4	1	4	4	4	5	5	5	1	3	5	1	5	4	5	4	1	5	4	4	4	5	2	5	4	4	4	4	4	4	1	5	5	4	5
2	1973	41	2	2	1	3	3	4	2	4	4	4		5	4	2	4	4	4	5	5	4	2	4	4	2	4	3	4	4	2	4	4	3	5	3	1	2	5	5	4	4	4	4	4	4	3	4	3
2	1996	18	1	2	2	2	1	4	1	5	5	3	3	5	5	1	4	2	5	4	4	3	5	4	4	1	5	1	2	4	2	4	3	2	3	5	2	4	2	4	4	3	4	3	4	5	5	2	4
1	1994	20	1	2	1	1	2	4	2	4		4	4	5	2	2	4	2	3	5	4	5	1	5	5	2	2	4	4	4	1	3	2	2	5	1	2	3	1	4	5	3	4	4	3	5	4	4	1
2	1975	39	2	1	1	2	1	5	4	1	4	4	1	5	4	5	2	4	2	5	3	5	3	1	2	3	5	1	4	3	4	5	5	5	4	4	3	5	3	3	2	5	4	5	4	5	5	5	5
2	1992	22	1	2	2	2	1	4	4	2	5	2	2	2	4	4	4	3	2	5	3	2	4	2	2	4	3	1	3	3	2	4	2	3	3	2	4	3	1	4	2	3	4	2	1	3	4	2	1
2	1960	54	2	1	1	2	2	3	4	2	4	4	3	2	3	3	2	2	3	4	4	4	2	4	2	3	3	2	3	4	4	4	4	3	2	4	2	2	2	3	4	4	4	4	2	3	3	4	4
2	1960	54	2	1	2	2	2	3	4	2	4	4	3	2	3	3	2	2	3	4	4	4	2	4	2	3	3	2	3	4	4	4	4	3	2	4	2	2	2	3	4	4	4	4	2	3	3	4	4
1	1977	37	2	1	1	2	1	4	2	3	3	4	3	4	5	4	4	1	3	3	2	2	2	2	2	4	4	3	4	3	4	3	2	3	4	2	5	2	2	2	2	3	4	4	2	5	4	2	3
1	1977	37	2	1	2	1	1	4	2	3	3	4	3	4	5	4	4	1	3	3	2	2	2	2	2	4	4	3	4	3	4	3	2	3	4	2	5	2	2	2	2	3	4	4	2	5	4	2	3
2	1994	20	1	2	1	2	1	2	2	4	4	5	4	4	2	3	4	1	3	4	4	4	2	4	5	2	2	2	4	3	2	2	2	3	4	1	2	3	4	5	4	3	4	5	5	4	4	4	1
1	1943	71	3	2	2	4		5	3	2	5	5	4	5	5	4	3	2	4	5	4	3	2	4	4	3	4	3	3	5	4	3	3	3	3	2	3	3	1	2	3	4	4	3	3	5	4	3	3
1	1992	22	1		2	2	1	4	2	4	5	4	4	4	4	4	4	1	3	4	2	4	2	4	4	2	5	4	4	4	2	4	1	4	5	3	4	2	5	2	4	4	4	5	2	5	4	4	2
1	1955	59	3	1	1	1		4	4	2	4	5	2	5	4	2	5	2	4	3	2	5	2	2	5	1	4	3	5	5	4	5	4	5	2	2	3	4	4	3	4	4	4	4	3	3	3	4	4
2	1978	36	2	1	2	1	2	4	2	4	4	4	4	4	3	2	2	4	4	4	4	4	2	4	4	2	4	2	4	4	4	4	4	4	4	3	3	4	4	4	5	3	4	4	4	4	4	4	3
2	1978	36	2	2	1	1	1	4	2	4	4	4	4	4	3	2	2	4	4	4	4	4	2	4	4	2	4	2	4	4	4	4	4	4	4	3	3	4	4	4	5	3	4	4	4	4	4	4	3
2	1945	69	3	1	1	1		5	2	4	4	5	5	5	5	2	4	3	3	5	4	4	2	4	4	2	4	3	3	4	1	5	4	4	4	2	2	3	4	4	4	5	4	2	3	5	5	3	3
2	1962	52	2	1	1	2		5	1	5	5	5	4	5	5	1	4	4	5	5	4	5	4	4	5	1	3	5	5	5	1	5	2	4	4	5	2	3	4	5	2	4	4	4	1	5	5	5	5
2	1995	19	1	1	1	4	1	4	3	2	4	2	2	4	2	4	4	4	3	4	3	2	4	2	4	4	4	2	3	4	1	4	1	4	3	2	5	4	2	2	3	4	4	4	3	5	4	3	3
2	1994	20	1	2	1	2	3	4	3	4	4	4	3	4	3	4	4	3	2	5	3	5	4	3	2	3	4	3	2	3	4	4	4	2	3	3	2	5	4	3	4	4	4		5	5	1	4	4
1	1989	25	1	1	1	3	3	5	2	2	5	5	2	5	5	3	5	3	4	1	4	5	1	1	1	1	5	1	5	3	2	4	1	3	2	2	4	3	1	1	3	4	4	5	1	1	2	5	5
2	1995	19	1	1	1	2	1	4	2	2	5	3	2	4	2	2	3	2	2	3	4	4	4	4	4	2	4	2	3	4	4	4	2	4	4	1	2	4	2	3	3	3	4	4	3	5	4	3	1
2	1976	38	2	1	1	3	1	4	3	2	5	4	2	4	3	2	4	1	4	5	5	1	3	3	4	3	5	2	2	3	4	2	2	4	2	2	3	2	5	3	2	4	4	2	4	5	3	4	2
1	1980	34	2	1	1	1	1	4	1	4	4	4	2	4	4	3	4	3	4	5	3	1	1	4	4	2	4	3	4	5	1	4	4	4	2	3	4	4	2	4	4	3	4	4	2	5	4	2	3
2	1953	61	3	1	1	2	1	4	4	3	4	4	2	4	4	4	4	2	2	5	5	3	4	2	2	3	3	4	2	4	3	4	2	4	4	2	4	4	4	5	3	3	4	1	5	5	2	2	3
2	1996	18	1	2	2	4	1	4	3	4	5	4	3	4	2	3	3	3	3	5	3	5	2	4	3	2	4	4	4	3	4	3	4	4	5	3	3	4	2	3	4	3	4	1	3	5	4	4	2
2	1946	68	3	2	1	4		4	2	3	4	4	3	4	4	3	4	2	3	5	2	4	3	4	3	3	4	3	4	4	3	3	2	2	3	3	2	4	3	3	4	4	4	3	2	3	3	4	3
2	1954	60	3	1	1	3		4	2	3	5	4	4	4	5	4	4	2	4	4	2	4	4	4	2	3	4	2	2	3	4	4	4	3	3	4	4	4	4	2	2	4	4	4	4	4	4	4	3
2	1973	41	2	1	2	1	2	4	2	4	4	4	3	5	4	2	4	4	4	5	5	4	2	4	4	2	4	3	4	4	2	4	4	3	5	3	1	2	5	5	4	4	4	4	4	4	3	4	3
2	1997	17	1	2	1	2	3	5	2	4	4	5	4	5	4	4	4	1	4	4	4	2	4	5	5	4	3	2	5	4	1	5	4	4	4	4	4	3	2	2	4	3	4	4	2	5	4	5	5
2	1947	67	3	2	2	2		5	2	5	5	5	4	5	4	4	5	3	4	3	4	4	3	5	5	1	2	5	4	5	1	5	2	3	4	5	2	2	3	5	5	3	4	3	2	2	4	5	2
2	1976	38	2	2	1	3	1	2	2	4	5	5	4	5	4	2	4	4	4	5	3	5	4	4	5	2	5	3	4	4	5	4	5	4	4	2	2	2	2	5	4	5	4	5	2	5	5	5	3
2	1966	48	2	1	2	4	1	3	2	2	4	4	4	4	4	2	2	4	4	4	4	4	1	4	4	1	4	2	4	4	4	2	4	4	2	3	1	4	4	4	4	4	4	2	2	2	4	4	3
2	1995	19	1	1	1	4	1	4	4	2	3	4	3	4	3	2	3	2	4	4	5	3	2	2	3	3	2	1	3	4	4	4	1	2	4	4	2	4	3	2	5	5	4	5	3	5	4	4	3
2	1981	33	2	2	1	3	3	5	2	2	5	4	4	4	5	2	4	1	4	5	3	3	3	4	4	2	2	4	4	5	1	3	2	2	4	2	2		5	5	4	3	4	2	2	5	2	3	1
2	1987	27	1	1	1	2	1	4	2	5	5	5	5	3	5	2	4	1	2	4	3	2	3	4	2	1	1	3	4	5	2	3	1	1	2	2	1	1	1	2	5	4	4	5	1	2	1	2	1
2	1997	17	1	2	1	4	1	4	4	3	4	3	3	4	3	4	4	4	2	4	3	2	2	3	4	3	4	2	2	2	4	4	4	3	4	3	4	2	1	4	4	2	4	3	4	4	4	4	2
2	1995	19	1	2	2	2	1	4	4	4	4	3	2	5	4	5	2	4	1	4	3	2	2	5	5	4	4	5	2	2	2	2	2	4	5	1	5	2	1	4	4	2	4	2	5	5	4	4	1
2	1981	33	2	1	2	1	2	5	2	2	5	4	4	4	5	2	4	1	4	5	3	3	3	4	4	2	2	4	4	5	1	3	2	2	4	2	2	3	5	5	4	3	4	2	2	5	2	3	1
2	1993	21	1	1	1	4	1	4	2	4	5	3	5	5	3	3	4	2	4	5	4	5	1	5	3	2	4	1	4	4	4	4	2	2	4	3	3	3	2	5	3	4	4	5	2	5	4	4	3
2	1997	17	1	2	2	2	2	4	3	2	4	3	4	5	3	4	4	3	4	4	4	5	4	2	4	4	5	2	3	3	3	5	4	4	5	4	3	4	3	4	4	3	4	3	3	5	5	4	3
2	1969	45	2	1	1	3		3	2	4	4	4	5	5	4	2	4	3	4	5	3	5	1	2	5	1	5	3	2	4	1	4	4	5	5	1	1	4	2	4	5	4	4	4	5	3	3	4	3
1	1978	36	2	1	1	1	1	5	2	4	5	4	3	4	3	1	3	3	4	5	5	5	1	4	5	1	3	3	3	4	3	5	3	4	5	4	1	4	2	5	3	4	4	3	2	4	4	5	5
1	1957	57	3	1	1	4		4	2	3	4	3	5	4	4	2	4	3	3	5	5	5	3	4	4	1	5	3	4	3	4	3	3	5	5	3	2	5	4	5	5	4	4	3	3	4	3	4	3
2	1959	55	2	1	1	4	2	4	2	4	4	4	4	4	4	3	4	3	3	5	4	5	2	4	4	3	4	4	3	3	3	4	3	4	4	2	2	3	3	4	4	4	4	1	3	5	5	2	3
2	1957	57	3	1	2	2		4	2	3	4	4	4	4	3	2	4	3	4	5	5	5	3	4	4	1	4	4	4	4	3	4	3	4	4	5	1	4	3	4	4	4	4	4	1	4	4	4	3
2	1981	33	2	1	2	4		3	2	2	5	4	5	3	4	2	4	3	4	5	5	4	1	5	5	1	3	5	5	5	5	4	2	3	5	4	3	3	4	2	5	5	4	5	2	4	5	5	3
2	1979	35	2	2	1	2	2	5	3	3	4	4	4	4	5	4	2	2	4	4	3	5	2	4	2	2	2	2	4	3	4	3	2	3	2	4	4	4	4	5	4	4	4	5	4	5	4	4	4
1	1954	60	3	2	1	4		2	2	5	5	2	5	5	3	2	4	2	5	5	4	4	2	5	4	2	3	4	3	5	2	5	2	4	5	4	4	4	4	5	4	4	4	2	2	5	4	4	4
2	1971	43	2	1	1	1	2	4	2	4	4	5	5	5	3	1	3	3	5	5	4	3	1	3	5	1	3	5	5	5	1	5	2	5	5	5	2	5	5	5	5	5	4	3	3	5	5	4	5
2	1988	26	1	1	1	2	2	2	2	5	4	4	5	5	4	2	4	3	4	5	3	5	5	5	5	2	3	5	4	4	3	4	3	3	3	4	2	3	3	4	4	4	4	4	3	4	5	4
2	1980	34	2	1	1	3	2	4	5	2	5	3	4	1	3	4	4	1	3	4	2	2	5	3	4	4	5	1	2	2	5	3	4	4		2	4	2	1	4	2	2	4	3	1	4	4	5	4
2	1979	35	2	1	2	1	1	4	2	5	1	3	5	4	4	2	4	2	2	2	4	2	1	5	2	1	1	5	4	2	4	2	4	2	1	2	1	1	5	2	4	4	4	5	3	1	1	1	1
2	1958	56	3	2	1	1	1	4	2	2	4	4	4	5	5	4	5	2	4	3	2	4	4	4	3	2	4	3	3	4	2	5	4	4	2	4	4	4	2	4	4	2	4	2	2	4	4	2	4
2	1958	56	3	1	1	2	2	4	2	5	4	5	5	5	5	2	4	2	3	4	4	4	2	5	4	2	4	3	5	5	2		3	4	4	1	1	2	4	3	4	4	4	4	2	4	4	4	2
2	1954	60	3	1	1	1	1	5	1	4	5	5	5	5	5	1	4	2	5	5	3	4	2	4	4	1	4	5	5	5	1	5	1	3	4	4	2	4	4	4	5	4	4	4	2	4	4	4	5
2	1964	50	2	2	2	2	2	4	1	5	4	4	4	4	2	1	2	2	2	4	2	1	2	4	2	1	1	4	5	5	2	4	1	4	4	2	2	1	2	4	4	4	4	4	1	4	2	2	2
2	1964	50	2	2	2	3	3	4	1	5	4	4	4	4	2	1	2	2	2	4	2	1	2	4	2	1	1	4	5	5	2	4	1	4	4	2	2	1	2	4	4	4	4	4	1	4	2	2	2
2	1979	35	2	1	1	2	2	4	2	5	1	3	5	4	4	2	4	2	2	2	4	2	1	5	2	1	1	5	4	2	4	2	4	2	1	2	1	1	5	2	4	4	4	5	3	1	1	1	1
1	1994	20	1	1	1	3	1	5	2	2	4	3	3	5	3	5	4	3	4	3	3	4	3	2	3	2	4	1	3	2	3	4	4	3	2	2	2	4	2	2	2	4	4	4	4	2	3	4	4
2	1993	21	1	2	2	4	1	3	4	3	4	4	2	4	4	4	4	3	3	5	2	2	4	4	3	3	3	4	2	4	4	4	3	4	4	1	2	2	2	4	3	3	4	4	4	4	3	4	1
2	1984	30	1	1	1	2	2	4	4	2	2	4	2	4	3	4	4	2	3	3	2	2	4	3	4	4	5	2	3	3	4	4	4	3	2	2	5	2	1	3	3	4	4	3	3	4	3	4	4
2	1984	30	1	1	2	1	1	4	4	2	2	4	2	4	3	4	4	2	3	3	2	2	4	3	4	4	5	2	3	3	4	4	4	3	2	2	5	2	1	3	3	4	4	3	3	4	3	4	4
2	1996	18	1	1	1	2	1	4	1	4	4	3	5	4	1	1	2	2	5	5	4	5	2	5	5	1	4	1	2	4	1	4	2	5	4	4	2	3	2	5	4	4	4	4	2	5	4	4	5
1	1957	57	3	2	1	3		4	3	4	4	3	2	4	3	4	4	2	3	5	4	4	2	3	2	4	4	5	3	4	1	2	2	2	4	2	4	3	3	3	2	2	4	3	2	4	3	4	4
1	1960	54	2	1	2	2		4	2	1	2	3	1	4	4	4	5	1	1	1	2	4	5	2	3	3	4	1	5	3	5	4	2	2	3	4	4	2	4	2	2	4	4	2	2	5	2	5	4
2	1995	19	1	2	2	4	1	3	5	2	5	3	2	2	2	5	4	2	4	2	3	2	4	3	4	4	4	2	3	2	3	4	2	2	3	4	3	2	3	4	2	4	4	4	5	3	4	4	4
1	1996	18	1	1	2	2	1	4	2	4	4	4	3	4	2	3	4	3	3	4	2	3	5	4	2	2	4	2	5	4	1	5	2	3	4	3	3	4	1	2	4	4	4	4	2	4	4	4	1
2	1962	52	2	2	1	1	2	3	2	5	5	4	4	4	5	3	2	2	3	5	3	1	1	5	2	2	4	4	4	4	1	4	1	4	4	4	3	1	1	5	5	4	4	3	3	4	4	2	3
1				1	1	2		4	2	4	4	3	5	5	4	2	4	2	4	5	3	3	2	5	4	1	5	2	4	4	1	4	4	4	2	3	1	2	1	3	4	4	4	2	2	5	4	4	3
1	1987	27	1	2	1	2	1	4	2	4	3	5	4	4	2	4	4	2	3	4	2	3	3	4	4	4	3	3	5	4	2	4	3	2	2	4	4	3	1	2	3	3	4	3	4	5	2	2	5
1	1945	69	3	1	2	4		4	2	4	5	3	3	5	4	2	3	2	4	3	3	2	1	5	5	1	3	4	1	5	2	4	3	2	5	5	1	4	3	3	5	2	4	4	1	1	4	3	4
2	1948	66	3	1	1	2		5	3	4	4	4	5	3	5	2	2	2	3	5	5	4	1	2	3	4	4	2	4	4	1	4	4	2	2	5	3	3	1	3	4	4	4	3	1	1	4	5	5
2	1958	56	3	1	2	1	2	4	2	2	4	4	4	5	5	4	5	2	4	3	2	4	4	4	3	2	4	3	3	4	2	5	4	4	2	4	4	4	2	4	4	2	4	2	2	4	4	2	4
2	1972	42	2	1	1	1	1	4	2	4	4	4	4	4	5	2	2	4	2	5	4	5	1	3	5	1	3	5	4	5	1	5	3	3	4	2	1	2	2	4	5	4	4	4	3	4	4	3	2
2	1995	19	1	2	1	2	1	4	1	2	4	4	5	4	5	2	3	2	3	4	3	4	4	5	4	3	4	1	4	4	4	4	3	2	2	3	2	5	1	2	4	5	4	5	2	4	2	5	3
2	1953	61	3	2	1	3		4	2	1	5	5	2	5	2	3	4	2	2	5	5	5	2	5	4	1	5	4	4	5	1	5	4	2	4	1	1	5	4	4	5	3	4	5	4	5	5	4	3
2	1958	56	3	1	1	1	2	4	2	5	4	5	5	5	5	2	4	2	3	4	4	4	2	5	4	2	4	3	5	5	2	3	3	4	4	1	1	2	4	3	4	4	4	4	2	4	4	4	2
2	1988	26	1	2	2	2	2	5	2	5	5	5	5	5	5	1	4	1	5	5	5	5	1	5	5	1	1	5	5	5	1	4	2	2	4	3	2	4	3	3	5	5	4	5	2	5	5	5	3
2	1988	26	1	2	2	1	1	5	2	5	5	5	5	5	5	1	4	1	5	5	5	5	1	5	5	1	1	5	5	5	1	4	2	2	4	3	2	4	3	3	5	5	4	5	2	5	5	5	3
1	1933	81	3	1	1	1		5	1	5	4	5	5	5	5	1	2	3	5	5	5	5	2	5	5	1	4	5	4	5	3	5	3	2	5	4	1	4	5	5	5	4	4	3	1	5	5	4	4
2	1996	18	1	2	2	2	1	4	3	1	3	5	2	5	4	5	5	1	5	5	3	4	4	2	2	3	5	2	4	3	4	4	5	5	5	5	3		1	3	3	4	4	5	2	4	5	5	5
2	1994	20	1	1	2	2	1	5	2	5	4	5	5	4	4	1	4	2	4	4	4	5	1	5	5	2	3	2	3	2	2	4	2	2	5	4	2	4	2	3	4	5	4	5	2	3	3	4	4
2	1985	29	1	1	1	2	1	4	2	3	3	4	2	4	3	3	3	2				2	4	2	3	2	3	2	2	2	1	3	2	2	4	1	2	4	4	3	3	2	4	4	2	4	4	4	3
1	1947	67	3	1	1	2	1	4	2	5	4	5	5	5	4	2	4	2	4	4	4	5	2	4	4	1	5	3	5	4	1	5	5	3	4	5	2	4	3	5	5	5	4	4	2	5	5	4	5
2	1996	18	1	2	1	2	1	4	3	4	5	3	2	4	3	2	4	3	2	5	3	2	3	4	3	4	2	2	3	3	1	4	2	4	4	3	2	2	2	4	5	2	4	3	2	4	3	4	1
2	1954	60	3	2	1	1	1	4	2	5	4	4	5	5	4	1	4		3	5	3	4	1	5	3	1	1	3	4	4	2	4		4	4	3	1	3	1	4	4	3	4	3	3	5	4	3	3
2	1994	20	1	2	2	2	1	3	2	2	4	2	1	4	4	5	2	3	4	3	2	3	5	4	2	5	4	1	2	2	4	4	3	2	2	2	5	3	1	4	4	3	4	2	2	4	4	2	1
2	1996	18	1	2	1	4	1	4	3	4	4	4	4	4	4	4	3	3	4	5	4	4	3	4	4	2	4	2	3	4	3	4	2	3	4	2	2	2	2	3	4	3	4	4	3	2	3	2	2
1	1985	29	1	2	1	2	1	3	2	2	4	4	5	5	4	2	3	3	3	2	4	4	2	4	4	1	4	2	4	5	4	3	4	4	4	2	2	3	2	2	4	3	4	4	2	4	2	4	3
1	1985	29	1	1	2	1	1	3	2	2	4	4	5	5	4	2	3	3	3	2	4	4	2	4	4	1	4	2	4	5	4	3	4	4	4	2	2	3	2	2	4	3	4	4	2	4	2	4	3
2	1982	32	2	2	1	2		4	2	4	5	5	4	5	5	2	2	4	3	5	2	4	2	3	4	1	4	4	4	4	5	3	4	5	4	1	3	2	3	4	4	4	4	4	2	5	3	2	1
2	1965	49	2	1	1	2	1	3	2	5	5	4	5	5	4	3	3	2	4	5	2	2	5	4	4	3	2	4	3	4	5	5	2	5	3	4	4	1	1	5	3	3	4	3	4	4	4	4	4
2	1947	67	3	2	1	1		4	2	3	4	4	4	5	4	3	4	2	5	5	3	3	3	4	4	2	3	3	4	5	3	4	2	3	4	2	2	3	2	4	4	4	4	3	2	3	4	3	3
1	1942	72	3	2	2	2		4	2	3	4	4	4	5	5	2	4	4	4	5	4	4	2	5	4	2	4	1	4	5	2	5	4	4	4	5	2	2	1	3	4	5	4	4	1	4	4	3	1
2	1978	36	2	1	1	3	1	2	4	5	4	4	3	4	2	3	3	3	2	3	3	3	4	3	4	3	4	4	3	4	5	4	2	4	4	3	2	1	3	3	5	4	4	4	5	3	4	3	3
2	1954	60	3	2	1	3		4	2	4	3	3	4	4	3	3	4	3	4	5	5	5	2	4	4	2	4	3	3	4	2	4	4	4	3	3	3	3	4	3	3	3	4	3	3	4	4	4	3
2	1997	17	1	2	1	2	1	4	3	4	4	3	4	3	3	4	4	3	3	3	2	5	5	2	4	4	4	3	3	4	3	4	3	3	4	3	4	3	3	4	3	3	4	3	2	5	3	4	4
1	1953	61	3	1	1	4		4	2	5	5	5	5	5	4	2	4	4	4	3	4	4	1	5	5	1	4	4	4	4	1	4	2	2	4	3	1	1	1	5	5	5	4	4	3	4	4	4	2
2	1992	22	1	1	2	4	2	4	2	4	5	4	2	4	4	5	4	3	2	5	2	2	4	2	1	5	4	1	4	4	5	4	4	4	5	4	5	4	3	5	4	4	4	4	4	4	4	4	4
2	1992	22	1	2	4	1	1	4	2	4	5	4	2	4	4	5	4	3	2	5	2	2	4	2	1	5	4	1	4	4	5	4	4	4	5	4	5	4	3	5	4	4	4	4	4	4	4	4	4
1	1979	35	2	1	1	1	1	4	2	1	2	2	2	5	1	5	5	1	1	5	1	5	4	1	5	2	5	1	2	5	5	5	5	5	4	4	2	5	4	5	1	4	4	2	4	5	4	2	4
2	1953	61	3	1	1	3		3	2	4	4	4	3	3	3	2	4	2	4	5	4	4	3	3	3	2	4	5	4	3	5	4	1	3	4	5	4	4	2	5	5	2	4	1	3	5	1	4	5
2	1959	55	2	1	1	3		4	2	4	4	4	5	5	5	2	3	3	4	4	4	3	2	4	5	1	4	3	4	5	1	3	4	5	3	4	1	2	2	4	4	4	4	4	3	5	5	4	4
1	1959	55	2	1	1	1	1	4	3	5	4	3	4	4	4	3	4	4	4	4	2	4	2	3	4	2	5	3	2	4	3	4	5	4	4	4	2	3	4	4	4	4	4	2	4	4	4	3	2
1	1959	55	2	1	1	1	1	4	3	5	4	3	4	4	4	3	4	4	4	4	2	4	2	3	4	2	5	3	2	4	3	4	5	4	4	4	2	3	4	4	4	4	4	2	4	4	4	3	2
2	1952	62	3	2	2	2		3	2	3	4	5	4	5	3	4	3	2	3	5	4	5	2	4	4	2	5	3	5	5	1	3	2	4	4	3	3	4	3	4	3	4	4	3	2	5	4	4	3
2	1972	42	2	1	1	3	1	4	1	4	4	3	5	4	4	2	4	4	4	5	4	5	2	4	5	2	4	3	4	4	1	5	4	4	4	3	2	4	3	3	4	4	4	4	3	4	4	4	3
1	1987	27	1	1	3	2	1	4	2	5	4	4	5	4	4	1	2	3	3	5	4	4	2	5	4	1	4	3	3	4	2	4	2	4	2	3	2	3	2	3	3	4	4	4	2	5	4	3	4
1	1987	27	1	3	2	1	1	4	2	5	4	4	5	4	4	1	2	3	3	5	4	4	2	5	4	1	4	3	3	4	2	4	2	4	2	3	2	3	2	3	3	4	4	4	2	5	4	3	4
1	1981	33	2	1	1	2	1	3	1	5	4	5	4	5	5	3	4	4	4	5	1	1	3	3	5	4	5	2	5	5	3	5	2	4	4	2	5	2	1	5	5	4	4	5	1	4	4	4	2
1	1981	33	2	1	2	1	1	3	1	5	4	5	4	5	5	3	4	4	4	5	1	1	3	3	5	4	5	2	5	5	3	5	2	4	4	2	5	2	1	5	5	4	4	5	1	4	4	4	2
2	1955	59	3	2	1	4		3	2	5	4	5	3	5	4	3	4	3	5	3	5	4	3	5	4	1	3	2	5	4	1	3	3	4	5	3	1	4	3	4	5	3	4	4	3	5	4	3	5
2	1953	61	3	1	1	3		3	3	2	4	4	2	4	4	4	4	3	3	5	4	3	3	3	4	2	4	2	4	4	4	4	4	5	5	3	2	4	4	4	4	4	4	3	3	5	4	5	4
2	1953	61	3	2	1	1		4	2	4	4	4	5	5	5	3	3	3	4	5	4	4	1	4	4	2	4	4	4	4	1	5	4	4	4	4	2	3	3	3	3	4	4	4	3	5	4	4	3
2	1945	69	3	2	2	2		3	2	4	4	4	5	5	5	1	3	3	4	5	3	5	3	5	5	2	4	4	3	4	5	4	5	5	5	2	2	4	2	4	4	3	4	3	4	5	4	4	2
2	1947	67	3	1	1	3		4	2	4	4	4	5	5	4	2	2	3	4	4	4	4	3	5	5	1	4	3	4	4	2	4	4	4	3	4	2	3	4	4	4	4	4	2	3	4	4	4	4
2	1961	53	2	2	1	2	2	5	2	3	4	4	4	5	5	2	3	4	3	5	4	4	3	4	4	2	4	4	4	5	2	4	4	3	4	4	4	2	3	5	4	4	4	3	2	5	4	4	3
2	1961	53	2	1	2	1	1	5	2	3	4	4	4	5	5	2	3	4	3	5	4	4	3	4	4	2	4	4	4	5	2	4	4	3	4	4	4	2	3	5	4	4	4	3	2	5	4	4	3
2	1991	23	1	1	2	4	1	4	1	3	4	5	5	4	2	3	3	4	4	5	5	5	5	4	5	1	5	3	5	2	4	3	4	4	2	5	1	5	4	4	3	2	4	5	3	5	5	4	5
2	1981	33	2	2	1	2	1	4	2	5	4	5	5	5	4	2	2	3	3	5	4	5	1	4	5	4	3	4	5	5	2	1	2	4	5	1	5	4	2	5	5	5	4	4	3	5	4	4	1
2	1995	19	1	1	1	4	1	3	4	4	4	4	3	4	3	2	4	3	4	5	4	5		4	4	2	5	1	3	4	3	5	4	4	4	3	2	3	3	2	3	4	4	3	3	5	4	4	3
2	1996	18	1	2	2	4	1	5	1	4	4	4	3	4	4	3	3	2	4	5	3	4	2	3	4	3	4	2	5	3	2	4	1	2	4		3	5	3	5	4	4	4	2	2	4	4	4	3
2	1995	19	1	1	1	3	1	2	5	3	5	3	1	5	2	5	5	3	3	5	3	3	5	3	3	5	5	5	1	3	4	5	2	5	4	2	5	5	3	5	3	5	4	4	2	5	5	3	3
2	1980	34	2	1	2	2	1	4	5	5	1	2	5	5	4	2	3	3	2	5	4	5	4	3	2	2	4	2	5	4	5	5	5	5	2	4	1	5	1	3	3	5	4	3	4	5	3	4	5
2	1977	37	2	1	1	3	3	4	3	2	4	3	1	5	4	2	1	3	5	5	2	5	1	3	4	1	5	1	4	5	5	4	4	3	2	5	1	4	4	4	4	4	4	5	4	4	5	5	5
2	1967	47	2	1	1	2	1	4	3	4	5	5	5	5	5	3	4	1	4	4	1	5	1	5	5	2	1	5	5	5	1		1	3	5	5	3	2	5	5	5	5	4	5	1	4	5	5	5
2	1960	54	2	1	1		1	2	4	3	4	4	2	4	4	3	4	4	2	4	3	4	3	2	4	2	4	3	4	3	4	2	4	4	4	1	2	3	4	5	3	3	4	1	5	4	4	3	2
2	1959	55	2	1	1	1	1	2	2	2	2	4	4	4	4	2	4	2	2	5	2	3	2	2	4	3	4		4	4	4	4	2	4	2	2	3	4	3	4	2	3	4	2	2	4	4	4	2
1	1983	31	2	2	1	2	1	3	2	2	5	4	1	5	4	4	2	4	2	5	2	2	4	2	4	4	5	3	3	4	4	4	4	5	4	1	4	4	1	3	4	2	4	3	2	5	5	5	1
1	1950	64	3	2	1	1		4	2	5	4	4	5	4	3	1	3	1	5	3	2	4	3	4	5	1	1	5	2	5	1	5	1	3	4	4	1	4	4	3	5	4	4	3	2	4	2	4	4
2	1987	27	1	2	1	2	1	5	2	4	3	5	1	4	4	4	2	3	4	4	3	3	2	3	3	2	3	2	4	4	2	5	2	4	4	3	2	2	4	2	4	4	4	5	3	2	4	4	2
2	1953	61	3	1	1	4		4	2	3	4	3	3	3	3	5	4	2	3	5	3	5	3	3	3	3	5	3	3	3	4	3	1	1	3	2	5	5	5	5	3	3	4	3	4	3	5	3	3
2	1988	26	1	2	1	3	2	3	4	2	4	5	3	4	3	4	2	4	3	4	2	4	4	2	4	5	4	3	4	3	5	4	5	4	4	3	4	3	2	3	2	3	4	4	3	4	4	4	3
2	1988	26	1	1	3	1	1	3	4	2	4	5	3	4	3	4	2	4	3	4	2	4	4	2	4	5	4	3	4	3	5	4	5	4	4	3	4	3	2	3	2	3	4	4	3	4	4	4	3
2	1977	37	2	1	1	1	2	4	3	2	4	3	1	5	4	2	1	3	5	5	2	5	1	3	4	1	5	1	4	5	5	4	4	3	2	5	1	4	4	4	4	4	4	5	4	4	5	5	5
2	1993	21	1	2	3	2	1	4	3	4	4	4	4	4	3	4	4	3	4	4	3	3	2	4	4	4	3	2	4	3	3	2	3	3	4	4	2	3	4	4	4	3	4	4	4	4	4	4	4
1	1943	71	3	1	1	3		4	1	5	5	4	4	4	4	1	4	4	3	5	4	5	1	4	4	1	5	3	3	4	1	3	2	4	4	3	1	4	1	4	4	4	4	2	2	4	5	4	3
2	1944	70	3	2	1	2		4	3	2	3	3	2	3	3	3	3	2	4	2	4	4	3	3	3	2	4	1	3	3	4	4	2	3	4	4	3	3	5	4	3	3	4	3	2	5	4	4	2
2	1960	54	2	2	2	2	3	3	4	3	4	3	4	5	2	1	2	4	3	5	4	5	2	4	5	1	4	4	4	3	2	5	3	3	4	3	1	4	2	4	4	4	4	3	4	4	4	2	3
2	1982	32	2	2	2	2	1	4	4	2	2	5	2	5	5	5	2	3	2	5	3	4	3	4	4	3	4	1	4	4	3	5	3	2	4	2	4	2	4	2	3	5	4	5	4	2	4	4	3
1	1949	65	3	1	1	3		4	2	4	3	3	5	4	4	3	3	4	3	4	3	1	1	5	5	3	3	4	4	5	1	5	3	3	2	3	4	2	3	4	4	5	4	3	3	5	5	4	3
2	1972	42	2	2	2	3	2	4	2	3	4	5	4	5	4	2	1	4	4	5	3	4	2	4	4	2	4	3	4	4	2	4	4	4	4	3	2	3	2	4	4	4	4	3	4	4	4	4	2
2	1972	42	2	2	3	1	1	4	2	3	4	5	4	5	4	2	1	4	4	5	3	4	2	4	4	2	4	3	4	4	2	4	4	4	4	3	2	3	2	4	4	4	4	3	4	4	4	4	2
2	1949	65	3	1	2	4		4	1	4	5	5	2	4	4	4	1	5	4	2	4	4	1	2	5	4	5	1	1	4	4	3	2	2	5	2	5	3	2	5	5	4	4	4	2	5	2	4	2
2	1954	60	3	1	2	2		4	3	4	5	4	4	5	4	3	4	3	4	5	3	4	4	3	4	2	3	3	4	4	4	4	2	4	4	4	3	2	4	4	3	3	4	2	2	4	5	4	4
1	1938	76	3	1	1	3		4	2	4	5	4	5	4	5	3	3	2	5	3	3	3	1	5	4	1	3	4	1	5	1	4	1	2	2	3	2	2	2	4	5	4	4	4	1	5	4	3	4
2	1988	26	1	2	1	1	1	2	2	4	4	4	4	4	4	3	2	4	4	5	4	4	3	5	4	4	4	3	1	4	5	4	4	3	4	2	2	4	4	4	4	4	4	4	3	5	3	5	3
2	1943	71	3	2	1	2		5	2	5	4	3	2	5	4	3	5	2	4	5	4	5	4	4	4	1	2	5	4	4	5	5	2	2	5	5	1	4	5	5	5	5	4	4	1	5	5	4	4
2	1991	23	1	2	1	2	1	5	2	5	4	5	4	5	5	2	2	2	5	5	4	5	1	5	4	1	5	2	5	5	1	4	5	4	5	5	2	2	2	4	4	5	4	5	4	5	4	4	5
2	1976	38	2	1	1	2	1	4	3	5	5	4	5	5	4	2	3	2	4	5	2	4	4	2	5	1	5	3	5	4	4	5	3	5	5	4	2	3	3	4	4	5	4	4	3	5	5	5	4
2	1994	20	1	2	2	3	1	5	1	5	4	3	5	5	3	3		1	4	5	3	3	2	5	5	3	3	3	5	3	4	5	1	3	3	5	3	5	5	3	5	5	4	5	1	5	3	3	5
2	1997	17	1	2	1	2	1	3	4	2	4	3	2	4	3	4	2	3	3	2	3	4	4	2	2	4	3	1	2	2	3	3	3	2	2	2	4	2	2	2	3	2	4	4	4	4	4	4	3
2	1991	23	1	1	2	3	3	5	3	2	4	2	3	4	2	3	2	2	3	1	4	4		4	4		3	4	5	4	1	2	1	1	4	2	1	4	4	2	4	3	4	4	1	4	1	4	2
2	1989	25	1	2	1	2	3	4	4	2	4	3	2	4	4	4	4	3	2	2	1	3	3	3	4	5	4	2	3		2	3	3	2	2	3	4	3	5	5	4	4	4	4	3	3	4	3	3
2	1989	25	1	2	1	2	1	5	2	4	2	5	5	4	5	3	2	2	3	4	3	2	2	4	5	2	2	3	3	4	2	2	4	3	4	2		3	3	3	4	4	4	4	4	5	4	3	2
2	1988	26	1	2	1	2	1	4	1	4	5	5	4	5	5	1	2	2	5	5	4	5	1	5	5	1	4	4	5	4	1	5	3	4	4	5	1	5	4	5	4	4	4	5	1	5	5	4	4
2	1986	28	1	1	1	2	1	4	3	2	4	5	4	5	5		2	5	4	5	3	4	4	4	5	2	3	4	5	4	2	5	3	4	3	2	2	3	3	4	4	4	4	4	4	4	4	4
2	1982	32	2	1	1	2	1	4	3	4	4	3	4	4	4	4	4	3	2	4	4	4	4	4	3		2	3	3	4	2	3	2	3	3	2	3	2	2	3	4	4	4	3	3	4	2	2
1	1977	37	2	1	1	2	1	2	2	4	4	5	4	4	4	2	2	3	3	5	4	2	1	4	4	4	4	4	4	4	1	3	4	4		2	3	3	1	3	5	4	4	5	2	4	3	4	3
2	1968	46	2	1	2	3	3	4	1	5	5	3	4	5	4	2	3	4	4	5	4	4	4	4	4	1	4	3	5	4	4	5	3	5	5	3	2	2	5	4	4	4	4	3	3	5	4	5	5
2	1965	49	2	1	1	3	3	5	3	2	4	4	3	5	3	2	5	2	2	5	2	2	3	4	4	3	5	3	4	5	1	4	4	3	4	2	4	3	2	3	4	3	4	4	2	4	3	4	2
2	1954	60	3	2	1	1	1	4	2	3	3	5	4	4	5		2	4	3	4	2	2	2	4	4	2	4	1	4	4	4	5	4	2	4	4	2	2	4	4	4	4	4	5	2	4	4	4	3
2	1991	23	1	2	1	2	2	5	3	2	4	2	3	4	2	3	2	2	3	1	4	4	3	4	4	3	3	4	5	4	1	2	1	1	4	2	1	4	4	2	4	3	4	4	1	4	1	4	2
1	1986	28	1	2	2	2	1	5	2	2	3	4	2	5	2	3	2	2	3	4	4	5	4	4	3	4	4	2	2	4	1	2	4	3	3	4	5	2	1	4	4	2	4	3	2	5	4	5	3
2	1995	19	1	2	1	2	1	2	4	2	5	4	2	4	4	5	2	4	4	4	4	4	3	4	2	4	4	1	2	4	4	4	2	1	2	4	4	2	4	1	4	4	4	4	2	4	4	2	4
2	1963	51	2	1	1	2		4	1	5	4	3	5	5	5	2	3	2	4	5	5	5	1	5	5	2	4	5	5	4	1	3	2	3	4	3	1	3	1	4	5	4	4	2	1	5	4	3	1
2	1968	46	2	1	1	2	2	5	1	5	5	4	5	5	5	1	1	2	2	5	2	5	1	5	4	1	3	3	3	5	1	5	2	2	4	3	1	1	2	5	5	5	4	5	2	3	3	3	3
2	1965	49	2	1	1	1	2	5	3	2	4	4	3	5	3	2	5	2	2	5	2	2	3	4	4	3	5	3	4	5	1	4	4	3	4	2	4	3	2	3	4	3	4	4	2	4	3	4	2
1	1961	53	2	1	1	2	1	2	5	2	3	4	4	4	4	4	2	4	3	5	1	1	2	5	4	4	4	3	1	4	2	4	5	4	3	1	5	1	1	1	2	4	4	4	2	5	4	4	2
2	1945	69	3	1	1	1		2	1	5	3	3	5	4	5	2	1	2	4	4	5	1	3	5	4	1	4	2	5	4	4	4	4	4	3	3	1	3	1	5	5	4	4	4	2	4	2	4	1
2	1963	51	2	1	2	1		4	3	3	4	4	4	4	4	3	3	2	2	4	3	3	3	4	5	3	4	4	4	3	3	4	4	4	4	2	3	3	3	3	4	4	4	4	4	4	4	2	2
2	1986	28	1	1	1	2	2	4	2	4	3	4	3	4	3	2	2	2	3	5	4	4	4	4	4	2	4	3	3	4	1	3	2	3	4	3	2	4	2	3	4	4	4	3	3	4	3	3	2
2	1986	28	1	1	2	1	1	4	2	4	3	4	3	4	3	2	2	2	3	5	4	4	4	4	4	2	4	3	3	4	1	3	2	3	4	3	2	4	2	3	4	4	4	3	3	4	3	3	2
1	1987	27	1	1	1	2	1	4	2	3	4	4	5	5	4	2	3	3	3	5	4	4	2	2	4	2	5	5	5	5	2	2	1	3	4	2	3	2	2	4	3	4	4	3	3	5	4	4	1
2	1950	64	3	2	1	1		5	1	4	4	5	2	5	5	4	3	2	4	5	4	2	3	4	4	5	4	1	5	5	1	5	5	4	2	3	5	2	1	4	4	4	4	3	1	5	4	1	3
2	1935	79	3	2	1			3	1	4	4	5	3	4	5	2	4	3	3	4	4	3	2	4	4	2	3	4	2	4	2	4	3	4	4	4	2	3	5	5	3	3	4	2	2	5	2	4	3
2	1972	42	2	1	2	1	1	3	2	4	5	4	4	5	5	3	3	3	4	4	2	3	3	4	4	2	3	3	5	4	3	4	2	4	4	3	2	3	2	4	2	4	4	4	3	3	4	4	3
2	1946	68	3	2	1	4		4	1	4	4	5	5	4	5	4	3	2	4	5	3	5	4	3	4	1	4	3	3	5	2	5	2	2	4	5	4	3	1	5	4	5	4	3	2	5	5	4	3
2	1953	61	3	1	1	2	1	4	2	5	5	4	5	4	4	2	4	2	4	5	4	5	1	4	5	1	4	5	4	5	1	3	4	4	4	2	2	3	4	4	4	4	4	3	4	5	3	4	3
2	1952	62	3	1	1	4		4	2	5	3	3	5	4	4	1	5	3	4	5	4	5	2	4	5	1	3	5	4	4	2	3	3	3	4	4	2	4	5	4	4	4	4	2	2	5	4	4	3
2	1968	46	2	2	1	2	2	4	1	5	5	3	4	5	4	2	3	4	4	5	4	4	4	4	4	1	4	3	5	4	4	5	3	5	5	3	2	2	5	4	4	4	4	3	3	5	4	5	5
2	1943	71	3	1	1	1		4	3	3	4	5	3	4	4	2	3	3	4	4	4	4	4	4	4	1	3	4	3	4	1	4	3	2	3	3	2	2	3	4	4	3	4	3	4	4	4	3	5
2	1987	27	1	1	1	2	1	4	2	4	4	4	5	4	4	2	4	4	4	5	4	4	3	4	5	1	3	5	4	4	1	5	4	4	4	4	2	4	2	5	4	4	4	5	4	4	4	4	4
2	1947	67	3	1	2	4		4	4	3	5	4	5	4	4	4	4	4	3	5	4	4	4	3	5	2	4	3	3	3	2	5	2	5	5	3	5	3	4	3	3	3	4	3	1	3	5	4	3
1	1969	45	2	1	1	1	2	3	2	4	5	5	5	4	3	3	2	3	4	4	4	4	2	4	4	3	4	5	1	5	1	5	4	4	4	4	3	4	1	4	5	4	4	3	3	5	5	5	4
2	1959	55	2	1	1	3		5	1	5	5	5	4	5	5	3	4	1	4	5	5	5	3	1	5	2	5	3	1	5	1	4	2	4	5	5	3	5	5	5	5	5	4	1	3	5	5	4	4
2	1994	20	1	2	1	4	1	4	2	5	5	3	5	5	3	4	4	2	3	4		4	1	5	5	1	4	1	3	4	1	3	4	2	1	2	4	1	3	3	4	4	4	4	4	2	3	2	2
2	1985	29	1	2	1	3	3	4	3	4	4	4	3	4	4	3	4	3	4	5	3	4	3	3	4	2	4	3	4	3	2	3	2	2	4	4	2	3	2	2	4	4	4	4	3	4	5	5	4
2	1996	18	1	1	1	4	1	3	4	3	4	3	1	4	3	5	3	2	2	4	3	1	4		3	4	4	3	2	3	4	2	4	4	4	3	3	4	3	4	3	2	4	2	4	5	3	4	3
2	1996	18	1	2	2	4	1	4	3	3	5	4	5	5	4	3	3	4	5		4			4	5	2	5	3	4	3	1	4	4	4	4	4	2	4	4	5	4	4	4	4	3	5	4	5	5
1	1960	54	2	1	1	3	2	4	1	4	5	5	1	5	5	2	2	3	4	5	4	5	1	4	5	2	1	5	2	5	2	5	4	4	4	4	2	4	4	5	5	5	4	5	1	4	2	4	5
2	1948	66	3	1	1	1	1	4	2	4	4	4	4	4	3	2	4	2	3	5	4	5	2	4	4	2	4	4	4	4	1	4	5	4	4	3	2	4	2	2	4	4	4	4	2	4	3	4	4
1	1996	18	1	1	1	2	3	4	1	4	4	3	3	2	2	2	3	2	2	1	2	2	2	5	5	3	1	3	3	4	1	2	1	1	2	2	4	3	1	1	4	3	4	5	1	1	1	4	2
1	1946	68	3	2	2	4		4	2	5	4	3	4	4	3	3	4	2	3	5	3	4	2	4	4	2	4	3	3	4	1	4	2	3	3	2	3	3	2	3	3	3	4	2	2	2	3	4	1
1	1953	61	3	1	2	1		4	2	3	4	5	5	5	5	2	5	4	2	4	4	1	2	4	2	2	4	1	5	5	3	4	4	5	2	1	3	3	1	2	3	4	4	5	2	3	2	3	2
1	1988	26	1	2	1	1	1	2	5	2	4	2	1	2	2	4	4	2	2	4	5	5	2	5	2	5	5	2	1	1	1	3	5	4	5	1	5	5	1	2	2	1	4	1	4	5	4	4	1
1	1988	26	1	1	1	3	3	2	5	2	4	2	1	2	2	4	4	2	2	4	5	5	2	5	2	5	5	2	1	1	1	3	5	4	5	1	5	5	1	2	2	1	4	1	4	5	4	4	1
2	1994	20	1	2	2	2	1	4	3	3	4	3	4	3	2	3	2	2	3	4	4	4	3	4	4	2	2	3	3	3	2	3	2	2	2	2	3	3	3	4	4	3	4	3	4	5	3	3	3
2	1956	58	3	2	2	2	1	4	1	3	5	5	5	5	5	2	2	4	4	4	3	2	4	4	5	1	4	5	5	5	1	3	1	3	5	3	1	3	2	4	3	5	4	3	1	2	3	5	3
2	1991	23	1	2	1	2	2	3	2	4	4	3	5	4	4	3	3	1	3	5	4	5	2	5	5	3	2	3	4	3	2	4	1	2	4	2	2	4	3	3	4	2	4	3	3	5	2	3	2
2	1991	23	1	1	2	1	1	3	2	4	4	3	5	4	4	3	3	1	3	5	4	5	2	5	5	3	2	3	4	3	2	4	1	2	4	2	2	4	3	3	4	2	4	3	3	5	2	3	2
2	1981	33	2	2	2	4	1	3	2	4	4	4	4	4	4	3	2	2	4	4	4	4	3	5	4	1	3	3	5	4	2	4	3	4	3	3	1	3	3	4	3	4	4	4	1	5	4	4	2
1	1978	36	2	2	2	2	2	4	2	2	4	4	3	4	2	4	5	4	1	5	3	2	4	3	2	3	4	2	4	4	1	4	3	4	5	1	4	3	1	5	3	2	4	4	3	5	4	2	1
2	1951	63	3		2	2	2	4	3	2	4	3	2	4	3	3	3	3	3	5	4	4	4	3	4	3	4	4	3	4	2	4	3	4	4	3	2	3	2	4	3	3	4	2	1	4	5	4	2
1	1941	73	3	1	1	1		4	3	4	4	4	4	4	2	4	4	2	2	5	4	4	1	4	1	1	4	3	2	4	1	5	4	4	4	3	2	4	2	4	4	3	4	3	2	4	5	2	2
2	1981	33	2	2	1	2	1	3	3	3	4	4	3	4	3	4	4	2	3	4	3	4	4	2	3	2	4	3	3	2	4	4	4	3	2	4	3	4	4	3	3	4	4	3	4	5	4	3	3
2	1948	66	3	2	2	3	1	3	2	3	5	2	3	4	4	4	4	2	4	4	3	3	2	5	4	2	3	3	2	4	1	3	2	4	4	3	3	3	4	4	4	4	4	3	2	4	4	4	4
2	1948	66	3	1	1	3		4	2	3	4	4	5	4	4	4	4	2	3	3	4	4	3	4	4	1	4	3	2	3	2	4	4	3	4	3	2	2	2	3	3	4	4	3	2	4	3	4	3
2	1979	35	2	1	1	2	1	4	1	5	5	5	5	5	5	1	1	1	5	3	1	3	4	5	5	1	3	3	5	4	4	4	2	2	2	2	2	1	3	5	4	4	4	5	2	4	4	4	3
2	1978	36	2	1	2	2	1	4	1	4	4	4	5	5	5	3	4	2	4	5	4	5	3	2	5	2	3	5	4	4	1	4	4	4	4	1	2	3	1	4	5	4	4	4	2	5	4	4	1
2	1990	24	1	2	2	2	1	3	2	5	4	3	5	4	3	2	3	2	4	5	4	4	2	5	4	2	3	4	4	5	2	3	3	4	4	3	2	2	2	4	4	4	4	3	3	4	4	3	3
2	1985	29	1	2	2	1	2	4	3	4	4	4	3	4	4	3	4	3	4	5	3	4	3	3	4	2	4	3	4	3	2	3	2	2	4	4	2	3	2	2	4	4	4	4	3	4	5	5	4
2	1954	60	3	1	1	1		4	4	5	4	4	4	5	5	3	3	4	4	4	4	4	2	5	4	1	3	5	4	4	1	2	4	3	3	1	1	3	3	3	5	4	4	4	5	5	3	3	2
2	1982	32	2	1	1	3	2	2	2	4	4	4	4	5	5	4	4	4	4	5	2	4	2	4	4	2	4	2	4	4	2	2	4	2	4	3	4	4	2	2	4	4	4	4	4	4	4	4	3
2	1982	32	2	1	3	3	3	2	2	4	4	4	4	5	5	4	4	4	4	5	2	4	2	4	4	2	4	2	4	4	2	2	4	2	4	3	4	4	2	2	4	4	4	4	4	4	4	4	3
2	1975	39	2	1	2	2		4	4	4	4	5	5	4	5	2	3	2	3	5	4	5	1	4	4	2	4	3	4	4	2	2	5	4	4	2	1	3	2	4	4	5	4	5	2	4	5	5	2
2	1982	32	2	1	1	1	2	4	1	5	4	5	5	4	4	2	4	2	4	5	2	2	1	5	5	2	4	4	5	4	1	3	2	2	4	2	4	4	4	5	5	4	4	5	1	5	4	4	4
2	1982	32	2	1	1	1	1	4	1	5	4	5	5	4	4	2	4	2	4	5	2	2	1	5	5	2	4	4	5	4	1	3	2	2	4	2	4	4	4	5	5	4	4	5	1	5	4	4	4
2	1982	32	2	2	1	2	1	5	1	5	5	5	5	5	5	1	5	1	5	5	2	4	1	5	4	1	4	1	5	5	3	5	1	3	5	4	1	5	5	5	2	5	4	5	3	3	5	5	5
2	1950	64	3	2	2	1		4	2	2	5	5	4	4	5	2	4	3	4	4	2	4	2	4	5	1	4	4	5	4	2	4	2	4	4	4	2	4	2	4	4	5	4	4	2	4	4	4	4
2	1944	70	3	2	2	2		4	2	3	5	5	5	5	5	2	4	4	4	5	4	4	3	3	5	2	2	3	4	5	2	4	5	5	5	1	2	3	3	4	5	4	4	4	1	5	4	4	1
1	1950	64	3	1	1	1		4	2	4	5	4	5	5	4	3	2	4	3	5	4	4	3	3	5	3	3	4	1	5	2	5	5	5	4	3	4	4	2	4	5	4	4	3	4	4	4	5	4
2	1969	45	2	1	1	1		4	1	5	5	5	5	5	4	2	4	3	4	5	3	3	3	5	4	1	3	5	1	5	1	4	3	3	2	1	3	3	3	3	5	5	4	4	3	5	4	4	4
2	1966	48	2	1	1	2	2	3	2	4	5	4	4	4	5	2	2	4	4	5	4	4	4	3	5	1	4	3	4	4	4	4	3	3	4	4	2	3	2	5	2	4	4	4	3	5	5	5	4
2	1966	48	2	1	2	1	1	3	2	4	5	4	4	4	5	2	2	4	4	5	4	4	4	3	5	1	4	3	4	4	4	4	3	3	4	4	2	3	2	5	2	4	4	4	3	5	5	5	4
2	1986	28	1	1	1	3	1	3	1	5	4	5	5	4	5	1	4	3	5	5	4	5	1	5	5	1	4	5	5	5	1	4	2	2	4	5	2	3	5	5	5	5	4	5	1	5	4	4	4
2	1973	41	2		1	1	1	4	4	2	5	4	5	4	5	3	2	2	4	5	1	5	2	5	2	2	4	3	4	4	4	5	2	3	4	5	4	5	4	4	4	4	4	4	4	5	2	5	5
2	1984	30	1	1	2	1	3	4	2	4	4	4	2	4	2	2	3	2	2	5	3	2	4	4	4	2	4	4	3	4	1	4	3	3	5	2	3	2	1	3	4	3	4	1	2	5	2	3	2
2	1977	37	2	2	1	1	1	2	2	4	4	4	4	4	4	2	2	3	3	5	2	4	1	5	5	2	3	3	3	4	1	4	3	4	4	2	4	3	2	4	5	3	4	2	4	5	4	4	4
2	1995	19	1	2	1	4	1	3	2	4	5	4	2	4	2	2	3	2	4	5	3	5	4	4	4	5	2	2	3	4	2	4	2	2	4	3	3	3	3	4	4	3	4	2	2	5	4	4	4
2	1995	19	1	2	2	4	1	4	2	5	4	4	3	4	2	2	3	4	2	5	4	4	1	4	4	2	4	3	4	3	2	3	3	4	4	2	2	2	1	4	5		4	2	2	4	4	5	2
2	1995	19	1	1	1	4	1	4	5	2	4	4	1	5	4	5	4	4	1	4	2	2	4	1	3	5	5	1	5	4	1	2	2		4	2	5	5	2	1	3	2	4	3	3	5	3	5	1
2	1994	20	1	1	1	2	1	4	3	4	5	4	4	4	3	4	5	2	2	4	2	5	3	2	5	1	5	1	4	4	1	3	3	4	2	2	2	3	1	2	3	4	4	5	1	5	2	5	3
2	1990	24	1	1	1	2	1	2	4	4	2	4	5	4	3	5	3	3	4	5	4	5	5	3	4	5	5	1	3	3	4	5	4	4	3	2	5	4	2	2	5	4	4	3	5	5	1	4	2
2	1964	50	2	1	1	1	1	4	2	4	4	4	5	5	4	2	3	2	4	5	4	4	3	4	5	1	3	4	4	4	1	4	2	5	2	4	2	2	2	4	4	4	4	5	2	4	1	5	3
2	1964	50	2	1	3	3	1	2	2	4	4	4	3	4	3	2	3	2	3	5	4	4	3	3	5	1	2	3	4	4	2	4	4	4	4	3	1	3	3	2	4	3	4	4	2	5	5	3	2
1	1960	54	2	1	1	3	2	4	1	5	5	4	5	4	5	2	2	2	4	4	1	4	1	4	5	1	1	4	4	4	1	5	3	3	4	4	2	5	1	5	4	5	4	5	1	4	4	5	5
2	1959	55	2	1	1	1	1	5	2	4	5	5	5	3	5	1	4	3	3	5	5	2	1	5	5	1	3	5			1	4	3	3	3	4	1	4	2	5	5	4	4	3	2	4	3	5	1
2	1955	59	3	2	1	2	1	3	2	4	3	4	3	4	4		4	2	4	4	4	5	2	5	4	1	3	4	4	5	1	5	3	3	3	4	2	4	4	4	5	4	4	4	2	5	4	4	5
2	1995	19	1	2	2	4	1	4	3	2	2	3	2	4	1	2	4	2	1	1	2	1	3	4	5	3	4	2	3	4	1	1	2	2	1	1	2	1	1	2	4	2	4	4	1	5	2	3	1
2	1997	17	1	1	2	2	1	4	4	3	5	2	2	4	3	4	4	4	2	5	4	2	4	2	2	5	4	4	4	2	3	4	2	3	4	3	5	3	2	4	2	4	4	4	4	5	5	4	2
2	1974	40	2	1	1	2	2	3	4	3	4	4	5	2	4	2	2	4	4	5	3	3	3	4	4	2	5	2	3	4	4	3	5	2	4	1	2	2	3	4	4	2	4	1	5	5	2	4	1
2	1974	40	2	1	2	3	3	3	4	3	4	4	5	2	4	2	2	4	4	5	3	3	3	4	4	2	5	2	3	4	4	3	5	2	4	1	2	2	3	4	4	2	4	1	5	5	2	4	1
2	1975	39	2	1	1	1	1	4	1	5	5	3	5	4	3	1	2	1	5	5	4	5	1	5	5	1	1	4	5	5	1	5	1	2	2	1	1	1	2	5	5	4	4	4	2	5	3	4	1
2	1953	61	3	1	2	1		4	2	5	5	4	5	5	5	2	4	2	3	4	4	4	2	4	4	2	2	4	2	4	1	4	2	2	3	4	1	2	2	4	5	4	4	3	2	4	4	3	3
2	1989	25	1	1	1	1	2	2	4	2	4	4	3	5	4	4	2	2	3	4	3	4	3	3	4	2	4	3	4	4	1	4	3	3	2	3	2	4	2	2	3	2	4	3	4	4	4	4	4
2	1989	25	1	1	1	1	1	2	4	2	4	4	3	5	4	4	2	2	3	4	3	4	3	3	4	2	4	3	4	4	1	4	3	3	2	3	2	4	2	2	3	2	4	3	4	4	4	4	4
2	1994	20	1	1	1	4	1	3	3	2	4	2	2	4	4	5	3	4	3	4	2	3	4	3	2	5	4	2	4	2	4	3	2	3	4	3	5	3	3	4	2	4	4	4	4	4	4	4	2
2	1991	23	1	2	2	2	2	4	2	4	3	4	4	5	4	3	2	3	2	5	3	4	4	4	4	2	3	3	2	4	4	4	2	4	4	2	3	2	2	3	4	4	4	4	3	4	3	4	3
2	1991	23	1	2	2	1	1	4	2	4	3	4	4	5	4	3	2	3	2	5	3	4	4	4	4	2	3	3	2	4	4	4	2	4	4	2	3	2	2	3	4	4	4	4	3	4	3	4	3
1	1932	82	3	1	1	2		5	2	1	4	5	3	4	5	5	3	1	4	2	5	5	1	1	5	2	4	1	4	4	1	3	2	5	4	4	2	5	1	1	2	5	4	4	4	4	4	4	2
2	1985	29	1	1	1	2	1	3	3	4	4	4	3	5	4	2	3	2	3	5	2	4	4	3	4	3	3	5	4	5	2	5	2	2	2	3	4	3	3	4	4	4	4	5	2	4	4	3	3
1	1966	48	2	1	1	1	2	4	2	4	4	4	4	4	4	2	3	3	3	5	4	4	2	4	4	2	4	3	4	4	2	4	4	4	4	3	3	3	2	4	3	4	4	3	2	4	4	3	3
2	1958	56	3	1	1	3		3	2	3	4	3	2	5	5	3	4	2	3	5	4	4	4	2	2	2	4	3	3	5	2	5	4	5	4	3	3	5	5	3	3	4	4	1	5	5	5	2	2
2	1950	64	3	1	1	4		4	2	4	4	4	4	4	3	2	3	3	4	5	4	4	3	4	4	1	4	4	4	4	1	3	4	4	4	3	1	3	4	4	4	4	4	3	2	4	4	4	3
2	1959	55	2	2	1	1	2	5	2	4	5	5	5	3	5	1	4	3	3	5	5	2	1	5	5	1	3	5	3	3	1	4	3	3	3	4	1	4	2	5	5	4	4	3	2	4	3	5	1
2	1955	59	3	1	2	2		3	2	4	4	4	4	4	4	3	2	2	4	5	3	3	2	4	4	2	4	3	2	4	2	4	4	4	4	3	3	4	3	4	5	4	4	3	2	5	4	4	3
2	1946	68	3	2	2	2		5	2	4	4	5	5	5	4	2	4	2	5	5	4	4	3	4	4	1	3	3	5	5	1	5	1	2	3	5	1	3	3	5	5	5	4	3	2	3	4	3	4
2	1955	59	3	1	2	4		3	2	4	5	2	5	4	3	2	4	4	4	5	3	5	4	3	5	2	3	3	4	5	3	4	3	3	4	4	2	3	3	5	4	4	4	2	3	4	4	4	5
2	1985	29	1	2	1	1	2	3	2	4	4	5	4	4	4	2	3	3	4	4	4	4	3	5	5	2	3	4	4	5	3	4	3	3	4	3	2	2	2	3	5	4	4	4	2	4	5	4	3
2	1985	29	1	1	1	1	1	3	2	4	4	5	4	4	4	2	3	3	4	4	4	4	3	5	5	2	3	4	4	5	3	4	3	3	4	3	2	2	2	3	5	4	4	4	2	4	5	4	3
2	1993	21	1	1	1	4	1	4	4	4	4	4	2	4	4	4	2	4	2	4	2	4	5	3	3	4	5	3	5	4	4	2	5	4	4	2	5	2	2	5	4	2	4	4	2	5	5	4	3
2	1957	57	3	1	1	1		4	2	4	4	4	4	4	5	4	4	1	5	5	3	4	2	4	5	1	3	4	5	4	2	4	2	3	4	3	2	3	3	4	4	4	4	4	4	4	5	4	4
2	1965	49	2	1	1	3	2	3	2	4	5	4	5	5	5	1	3	2	4	5	4	5	3	5	5	1	3	5	5	4	3	3	2	4	5	3	1	3	3	4	4	4	4	3	3	5	4	5	3
2	1965	49	2	1	3	1	1	3	2	4	5	4	5	5	5	1	3	2	4	5	4	5	3	5	5	1	3	5	5	4	3	3	2	4	5	3	1	3	3	4	4	4	4	3	3	5	4	5	3
1	1981	33	2	1	1	1	1	4	1	5	5	5	5	5	4	1	3	3	5	4	2	4	3	5	5	1	3	3	4	5	3	4	1	4	5	5	3	3	5	5	5	3	4	3	2	4	4	4	4
2	1995	19	1	2	2	4	2	4	2	2	5	4	4	4	5	3	4	4	3	5	3	5	2	2	4	2	5	2	5	3	1	3	4	4	4	2	2	4	2	3	2	4	4	5	5	5	4	5	3
2	1995	19	1	2	4	2	2	4	2	2	5	4	4	4	5	3	4	4	3	5	3	5	2	2	4	2	5	2	5	3	1	3	4	4	4	2	2	4	2	3	2	4	4	5	5	5	4	5	3
1	1988	26	1	2	1	1	1	4	2	4	5	4	4	5	4	1	2	4	4	5	5	5	2	5	5	1	5	2	5	5	1	4	4	4	5	5	1	4	1	5	5	5	4	5	4	3	4	4	5
1	1988	26	1	1	1	1	1	4	2	4	5	4	4	5	4	1	2	4	4	5	5	5	2	5	5	1	5	2	5	5	1	4	4	4	5	5	1	4	1	5	5	5	4	5	4	3	4	4	5
1	1959	55	2	1	3	4		4	2	4	5	5	5	5	5	3	3	3	3	5	3	3	3	3	4	3	5	3	5	5	3	5	2	5	5	3	3	3	3	3	3	4	4	4	2	5	5	3	3
2	1997	17	1	2	2	2	1	4	2	3	4	4	3	2	3	2	4	2	3	5	4	4	3	2	4	3	4	4	2	2	2	3	4	3	3	2	4	4	3	3	4	2	4	3	2	3	2	4
2	1993	21	1	2	1	2	1	4	4	5	5	4	3	5	2	2	1	2	3	3	2	2	4	5	5	2	4	1	5	3	2	3	3	2	4	2	2	2	2	4	5	4	4	5	1	5	5	5	2
2	1993	21	1	2	2	4	1	5	3	3	5	5	1	5		5	3	1	3	5	2	4	4	2	3	3	3	2	4	4	2	4	2	3	2	4	3	4	3	4	4	4	4	4	2	1	5	5	3
2	1989	25	1	1	2	1	1	3	4	1	4	1	1	4	1	5	5	1	5	5	2	5	5	4	1	4	4	1	2	2	4	5	1	4	2	5	5	5	3	4	2	2	4	1	4	5	5	5	5
2	1989	25	1	2	2	2	1	5	3	4	4	5		4	3	2	3	1	4	4	4	1	1	4	3	3	4	1	4	4	1	4	4	4	3	4	4	4	2	3	4	4	4	4	3	4	4	3	4
2	1982	32	2	1	1	1	1	3	2	4	4	3	4	5	4	4	2	4	3	5	3	2	5	4	4	4	4	3	2	4	4	4	4	3	3	2	5	3	2	4	3	4	4	4	3	5	4	4	3
1	1992	22	1	2	2	2	1	3	4	5	4	4	3	5	4	2	2	4	1	4	4	1	2	4	2	3	3	2	4	2	1	1	4	4	4	1	5	4	3	2	4	1	4	2	5	4	2	1	1
1	1985	29	1	1	1	4	1	4	3	3	4	4	2	4	4	2	4	3	3	5	2	2	2	2	4	2	3	4	4	4	3	3	2	3	3	2	3	3	3	4	4	3	4	3	2	4	4	4	2
2	1986	28	1	2	1	2	1	2	3	3	4	4	2	4	2	4	2	3	2	5	2	1	5	3	3	5	3	3	2	4	2	3	3	3	3	3	5	2	1	3	4	3	4	3	3	5	4	4	3
2	1944	70	3	2	1	2		4	2	2	4	3	3	3	4	3	4	2	3	4	3	2	2	4	3	3	4	1	3	5	1	5	2	2	2	3	3	2	1	3	3	4	4	4	3	5	5	4	4
2	1992	22	1	2	1	2	1	5	3	3	2	4	2	4	3	4	4	3	3	5	4	4	4	5	3	3	4	2	3	2	4	4	3	2	4	2	4	2	2	4	4	5	4	5	4	4	3	4	2
2	1969	45	2	1	2	2	1	4	2	3	4	3	4	4	4	2	3	3	2	5	2	4	4	2	2	4	2	2	4	4	3	2	3	3	4	4	5	5	2	4	4	4	4	4	5	4	4	2	3
2	1985	29	1	1	2	1	1	2	4	3	4	4	2	4	2	3	2	3	2	5	4	4	5	4	4	2	2	2	2	3	4	4	4	4	4	1	2	4	1	4	4	3	4	2	4	4	4	2	1
2	1958	56	3	1	1	4		3	4	3	4	3	4	4	3	4	4	4	4	3	3	4	3	4	4	3	4	3	4	4	3	2	3	3	4	2	4	4	3	5	3	3	4	1	4	3	3	3	2
2	1990	24	1	2	1	2	1	4	4	2	5	4	1	5	4	2	2	2	5	4	2	2	5	3	4	4	3	2	5	4	1	3	1	3	4	4	5	4	4	4	4	4	4	5	2	5	4	3	3
2	1993	21	1	2	2	2	1	4	2	5	4	3	5	5	2	2	2	4	2	5	5	4	3	4	4	2	3	3	4	5	2	2	2	4	4	4	1	3	5	5	3	2	4	2	1	5	4	4	3
2	1985	29	1	1	2	1	1	2	2	5	5	4	4	5	5	2	4	3	5	5	4	4	2	2	1	4	5	1	5	4	2	5	4	4	4	2	4	4	2	5	4	5	4	5	2	4	5	4	2
2	1952	62	3	1	1	4		3	2	3	4	4	3	4	5	3	3	3	4	3	4	4	3	4	4	3	4	5	1	5	4	3	2	4	4	3	2	4	2	3	3	3	4	4	3	4	4	4	3
2	1957	57	3	1	1	3	2	4	3	3	5	4	3	4	4	4	3	3	3	4	3	4	3	2	4	2	3	3	4	2	2	2	4	3	3	3	2	3	3	4	2	3	4	4	4	4	4	4	3
2	1957	57	3	1	3	2	2	4	3	3	5	4	3	4	4	4	3	3	3	4	3	4	3	2	4	2	3	3	4	2	2	2	4	3	3	3	2	3	3	4	2	3	4	4	4	4	4	4	3
1	1942	72	3	1	1	1	2	2	2	4	5	4	5	4	4	1	4	2	4	5	5	5	1	4	4	1	3	4	4	4	1	4	3	4	4	1	1	4	3	2	3	3	4	2	2	4	4	5	4
2	1982	32	2	2	1	1	2	3	2	4	4	3	4	5	4	4	2	4	3	5	3	2	5	4	4	4	4	3	2	4	4	4	4	3	3	2	5	3	2	4	3	4	4	4	3	5	4	4	3
2	1955	59	3	2	1	3		4	2	3	5	4	4	4	5	3	3	4	4	5	2	2	2	2	5	5	4	4	3	3	4	4	3	4	4	1	3	3	4	4	3	3	4	2	2	4	5	5	3
2	1989	25	1	2	1	2	2	3	4	1	4	1	1	4	1	5	5	1	5	5	2	5	5	4	1	4	4	1	2	2	4	5	1	4	2	5	5	5	3	4	2	2	4	1	4	5	5	5	5
	1960	54	2	1	2	2	2	4	2	4	4	4	4	4	5	2	4	2	4	4	2	2	1	4	4	2	4	3	4	4	2	4	2	4	4	5	2	2	1	4	4	5	4	5	1	4	5	4	4
2	1955	59	3	1	1	3		2	4	5	5	4	3	4	5	5	1	4	1	5	2	5	5	5	4	4	5	5	3	5	1	2	4	2	5	1	4	5	5	4	4	4	4	1	5	5	2	3	4
2	1947	67	3	2	1	1		5	1	3	4	5	4	5	4	3	2	3	5	4	4	4	3	4	4	1	4	4	5	5	1	5	2	4	2	5	1	2	4	2	4	4	4	4	3	4	2	4	5
1	1961	53	2	1	2	3		3	2	2	5	4	2	4	3	3	4	3	3	4	1	1	4	3	4	3	5	2	4	4	4	5	3	3	5	4	2	3	3	4	2	4	4	3	1	5	5	4	4
2	1990	24	1	2	1	2	1	4	3	4	5	4	5	4	4	4	4	2	4	3	2	4	2	2	3	4	4	3	3	3	4	4	3	4	3	3	4	4	2	3	3	4	4	3	2	4	3	4	3
2	1982	32	2	1	2	1	2	4	2	5	4	4	4	4	5	2	3	2	4	4	4	3	1	4	4	1	3	2	4	5	1	4	3	4	4	4	4	2	2	5	2	4	4	4	2	5	4	4	4
2	1982	32	2	2	1	3	3	4	2	5	4	4	4	4	5	2	3	2	4	4	4	3	1	4	4	1	3	2	4	5	1	4	3	4	4	4	4	2	2	5	2	4	4	4	2	5	4	4	4
2	1949	65	3	2	2	3		3	4	2	5	3	2	4	5	5	5	2	2	5	2	4	4	3	2	5	5	3	5	3	3	4	3	5	5	3	5	5	1	5	5	3	4	3	4	5	2	5	3
2	1947	67	3	2	1	4		4	2	3	5	4	4	5	5	2	4	3	4	5	2	4	2	3	4	1	5	3	5	4	1	3	5	4	5	3	1	3	4	5	2	3	4	2	2	5	5	4	3
2	1947	67	3	1	1	4		3	4	3	5	4	4	4	4	3	4	3	3	4	4	4	2	2	4	2	5	3	4	4	1	3	4	3	4	3	2	4	4	4	3	4	4	2	2	4	1	4	3
2	1979	35	2	2	1	2	2	4	2	4	5	5	3	4	5	3	4	3	3	5	3	4	3	5	5	3	5	3	1	5	1	5	5	5	4	1	3	3	1	5	4	5	4	3	3	5	4	4	1
2	1979	35	2	1	2	1	1	4	2	4	5	5	3	4	5	3	4	3	3	5	3	4	3	5	5	3	5	3	1	5	1	5	5	5	4	1	3	3	1	5	4	5	4	3	3	5	4	4	1
2	1955	59	3	2	1	1		4	2	4	4	4	4	5	3	2	3	2	4	5	3	4	1	5	4	2	4	5	4	5	1	4	2	5	4	5	1	4	1	5	4	3	4	2	2	5	5	4	5
2	1949	65	3	2	2	4		4	2	5	4	4	5	4	4	3	4	4	4	5	4	4	5	5	5	1	4	3	4	3	2	1	3	5	5	3	2	3	3	5	3	3	4	1	2	5	5	4	5
2	1978	36	2	1	1	1	1	3	1	4	4	5	5	5	5	3	3	2	3	5	3	5	2	4	5	2	5	4	5	4	5	4	4	4	4	2	2	5	3	5	5	5	4	5	4	5	5	5	3
2	1955	59	3	1	1	2	1	4	2	3	4	5	4	5	5	2	2	3	4	5	4	5	2	4	5	2	5	5	2	4	1	4	5	5	4	2	2	4	3	4	3	4	4	2	4	4	5	4	2
1	1949	65	3	2	1	1		4	2	5	5	5	5	5	3	2	4	2	5	5	2	4	2	4	5	2	4	2	5	4	2	5	4	4	4	5	2	4	4	4	4	4	4	5	3	5	4	4	4
2	1995	19	1	2	1	4	1	2	2	4	4	5	4	4	4	4	1	4	4	5	4	4	4	5	5	2	4	4	2	4	1	4	4	4	5	4	2	4	4	4	4	2	4	4	2	5	5	5	4
2	1957	57	3	1	1	4		4	1	5	5	5	5	4	5	1	4	4	2	5	5	5	1	5	5	1	3	5	3	5	4	5	4	4	5	5	1	4	4	5	4	5	4	4	2	5	4	4	4
2	1992	22	1	2	1	2	1	4	2	4	5	4	4	4	4	3	2	2	4	4	5	4	2	4	4	2	4	2	4	4	2	4	4	4	2	2	1	5	4	4	4	5	4	5	4	4	4	5	2
2	1980	34	2	1	1	2	2	2	4	2	4	2	4	4	4	5	3	4	1	5	4	5	5	4	4	2	4	2	2	4	2	2	4	4	3	2	2	2	2	4	4	2	4	4	4	4	2	5	2
1	1961	53	2	1	3	2	2	4	2	4	4	4	5	5	4	2	3	3	4	4	4	2	2	3	4	2	4	4	4	4	2	4	4	5	3	2	2	2	4	3	4	4	4	3	2	5	4	3	2
1	1992	22	1	1	1	2	1	4	2	4	2	2	3	4	2	1	1	4	3	4	2	2	2	5	3	2	3	4	4	4	1	4	4	3	5	1	1	2	1	4	1	5	4	4	4	5	2	2	2
2	1984	30	1	1	2	4	1	5	1	1	5	4	1	5	1	1	3	2	3	5	4	5	3	4	5	1	4	5	3	5	2	5	1	3	5	2	1	4	4	4	5	1	4	2	1	5	4	4	3
2	1982	32	2	1	2	2	1	4	2	4	5	5	5	4	4	4	3	2	3	1	1	4	2	4	5	1	5	1	4	5	2	5	4	2	4	1	2	4	1	5	4	4	4	5	2	5	2	4	3
1	1975	39	2	1	1	2	1	4	2	3	4	4	4	4	3	4	3	3	4	3	2	2	2	4	2	4	5	3	3	4	4	4	2	4	3	4	5	5	3	5	3	4	4	3	2	4	1	4	2
1	1972	42	2	1	1	3	1	2	2	2	4	5	3	4	4	3	3	2	3	5	2	2	3	2	3	3	4	2	3	3	2	4	3	3		3	4	4	3	3	4	4	4	4		4	3	3	3
2	1964	50	2	2	3	1	1	4	2	5	4	5	3	5	4	2	3	1	3	5	3	2	1	3	3	3	2	3	5	5	2	3	2	5	3	3	3	3	4	3	5	4	4	3	2	5	4	4	2
1	1951	63	3	1	1	3		4	2	3	4	5	4	4	3	3	2	3	3	4	2	2	2	4	3	3	3	4	5	4	3	4	2	2	4	4	3	2	2	3	4	3	4	3	2	3	3	3	3
2	1974	40	2	2	1	1	2	4	5	2	2	3	2	3	4	4	2	2	2	5	4	5	3	3	2	2	2	1	3	3	2	4	4	2	2	2	2	4	3	2	2	4	4	5	5	5	4	4	4
2	1974	40	2	1	1	3	3	4	5	2	2	3	2	3	4	4	2	2	2	5	4	5	3	3	2	2	2	1	3	3	2	4	4	2	2	2	2	4	3	2	2	4	4	5	5	5	4	4	4
2	1990	24	1	2	1	2	2	4	4	1	4	4	2	4	4	4	2	2	2	5	1	2	4	4	4	2	4	4	4	4	3	4	4	4	3	3	3	3	2	2	4	4	4	4	1	5	4	4	3
2	1990	24	1	1	2	1	1	4	4	1	4	4	2	4	4	4	2	2	2	5	1	2	4	4	4	2	4	4	4	4	3	4	4	4	3	3	3	3	2	2	4	4	4	4	1	5	4	4	3
1	1971	43	2	1	1	2	1	3	3	2	4	3	4	4	3	2	3	3	3	4	2	3	2	3	4	3	4	2	3	4	1	4	3	3	4	4	3	4	4	2	3	4	4	4	3	4	2	4	3
2	1942	72	3	1	2	3		5	1	2	4	5	3	4	5	3	4	2	3	5	4	4	1	4	4	1	4	5	4	4	1	5	2	3	3	3	4	3	2	3	4	3	4	3	3	5	3	4	3
2				1	4	1	1	4	2	2	4	3	4	4	3	3	4	3	4	3	2	4	2	3	4	2	4	2	2	3	2	4	3	2	3	4	2	3	2	3	3	5	4	4	2	4	4	4	3
1	1961	53	2	1	1	3	1	4	2	4	4	4	5	5	4	2	3	3	4	4	4	2	2	3	4	2	4	4	4	4	2	4	4	5	3	2	2	2	4	3	4	4	4	3	2	5	4	3	2
1	1965	49	2	1	1	2	1	5	2	3	5	4	5	4	5	1	3	2	4	5	3	5	1	4	4	3	4	3	4	4	2	4	2	4	3	4	1	3	2	2	4	4	4	3	2	4	4	4	5
1	1965	49	2	1	2	2	2	5	2	3	5	4	5	4	5	1	3	2	4	5	3	5	1	4	4	3	4	3	4	4	2	4	2	4	3	4	1	3	2	2	4	4	4	3	2	4	4	4	5
2	1948	66	3	2	1	2		4	2	4	4	2	5	4	4	1	2	2	4	4	5	4	2	5	5	1	4	4	3	4	1	3	5	4	4	2	2	2	2	4	4	3	4	2	2	5	4	4	1
2	1964	50	2	1	2	3	2	4	2	5	4	5	3	5	4	2	3	1	3	5	3	2	1	3	3	3	2	3	5	5	2	3	2	5	3	3	3	3	4	3	5	4	4	3	2	5	4	4	2
2	1946	68	3	1	1	1		3	2	4	5	4	5	4	4	2	4	3	3	4	3	4	2	4	4	2	3	1	3	4	1	4	3	2	3	2	3	3	2	4	4	4	4	4	3	4	4	4	2
2	1967	47	2	1	1	3	2	4	2	3	4	4	4	4	4	3	2	3	2	3	3	3	2	4	4	2	4	4	4	4	2	4	3	3	4	2	2	3	3	3	4	4	4	4	2	4	4	4	4
2	1967	47	2	1	3	2	2	4	2	3	4	4	4	4	4	3	2	3	2	3	3	3	2	4	4	2	4	4	4	4	2	4	3	3	4	2	2	3	3	3	4	4	4	4	2	4	4	4	4
2	1943	71	3	2	1	1		4	2	3	4	4	4	4	3	3	3	3	4	5	2	4	4	4	4	1	4	4	1	4	2	5	4	4	5	3	2	2	2	2	4	4	4	4	3	5	2	4	1
2	1949	65	3	2	1	2		3	2	4	4	4	3	4	4	2	2	3	4	3	4	5	4	3	4	2	4	4	4	4	2	3	4	4	4	4	2	4	3	4	4	3	4	2	4	3	4	4	3
2	1953	61	3	1	1	1		3	2	4	5	5	5	4	4	2	4	2	3	4	4	4	1	5	5	1	2	4	5	5	1	5	4	4	4	3	1	2	1	2	5	4	4	4	3	4	3	4	3
2	1941	73	3	1	1	4		2	5	2	4	3	3	5	4	4	3	5	3	5	3	4	3	1	4	5	5	3	3	2	2	3	4	5	3	3	5	4	3	5	2	2	4	1	5	5	5	4	3
2	1987	27	1	1	1	2	1	4	2	5	4	4	4	4	4	3	2	2	4	5	2	3	3	5	3	4	4	4	4	3	1	2	2	2	4	4	4	3	1	5	5	3	4	4	3	5	4	4	4
1	1993	21	1	1	1	2	1	4	2	4	4	5	4	4	4	2	4	2	3	4	2	4	3	4	4	2	5	4	4	4	2	3	2	2	3	2	2	4	3	4	4	4	4	5	2	5	3	4	3
2	1979	35	2	2	3	1	2	4	2	4	3	5	4	5	4	1	2	4	3	5	4	4	2	4	3	2	4	1	5	5	3	3	4	4	3	4	2	4	1	4	4	4	4	4	2	4	5	4	5
2	1979	35	2	3	1	1	1	4	2	4	3	5	4	5	4	1	2	4	3	5	4	4	2	4	3	2	4	1	5	5	3	3	4	4	3	4	2	4	1	4	4	4	4	4	2	4	5	4	5
2	1976	38	2	1	1	2	2	3	2	3	4	4	5	4	4	3	4	2	2	5	2	4	3	2	5	1	3	5	3	4	1	4	3	2	4	2	4	4	4	2	2	3	4	4	2	5	2	5	5
2	1947	67	3	2	1	4		4	2	3	4	5	3	4	3	1	3	2	4	5	4	5	3	3	4	1	3	5	4	4	3	4	3	2	4	5	2	4	2	4	4	4	4	3	3	4	4	4	4
2	1951	63	3	1	1	4		3	2	4	4	4	5	4	4	4	4	2	4	5	2	4	2	4	4	2	3	5	4	5	3	4	4	4	5	3	3	2	2	5	4	4	4	2	5	4	4	4	2
1	1952	62	3		2	4		4	2	3	4	4	4	4	4	2	4	2	4	4	3	4	3	4	4	2	4	4	4	4	2	4	2	2	3	3	2	3	3	4	4	4	4	4	2	5	2	4	4
2	1967	47	2	2	1	1	1	3	4	2	4	4	1	5	3	4	4	2	3	5	3	4	4	4	2	3	5	3	4	5	1	3	5	4	2	4	4	5	1	5	4	4	4	4	2	4	5	3	3
1	1949	65	3	1	1	3		5	2	4	4	4	5	5	5	3	2	2	4	4	3	5	2	4	4	2	4	3	4	4	2	4	3	4	3	3	2	3	3	4	4	4	4	3	2	5	4	4	2
2	1948	66	3	2	1	1		4	2	5	3	4	4	5	4	1	2	3	3	5	4	4	2	5	4	2	3	4	5	5	1	5	3	4	5	5	2	2	2	5	5	4	4	3	2	5	5	4	3
2	1985	29	1	2	1	2	2	4	2	4	5	4	4	5	4	3	2	2	4	5	3	4	3	4	4	3	4	3	4	4	2	3	3	4	4	2	4	3	4	4	4	4	4	4	2	4	5	3	3
2	1985	29	1	1	2	1	1	4	2	4	5	4	4	5	4	3	2	2	4	5	3	4	3	4	4	3	4	3	4	4	2	3	3	4	4	2	4	3	4	4	4	4	4	4	2	4	5	3	3
2	1964	50	2	2	1	2	1	4	2	3	4	4	2	5	4	2	2	4	3	5	4	5	2	5	5	2	4	3	4	2	1	4	3	5	5	4	2	5	2	4	5	5	4	4	2	5	2	4	3
1	1933	81	3	1	2	2		5	1	4	4	5	5	5	4	2	4	2	5	2	4	5	2	3	4	2	4	5	4	5	1	5	3	2	4	5	2	5	4	4	4	4	4	4	2	4	4	2	4
2	1938	76	3	1	1	1		3	3	3	4	4	4	4	3	4	4	3	4	5	2	4	1	4	4	3	5	4	4	4	2	5	2	3	3	3	4	4	4	3	4	4	4	3	2	5	4	5	4
2	1955	59	3	1	2	2		4	2	3	5	4	5	5	5	2	4	3	4	4	3	3	2	4	5	2	4	4	4	5	1	3	3	4	4	4	2	4	4	5	2	5	4	3	2	4	4	4	4
2	1950	64	3	1	1	1	2	3	4	4	4	4	5	4	3	4	2	4	3	5	3	3	3	3	4	2	4	4	4	4	2	5	5	4	3	3	4	4	3	4	3	4	4	3	3	4	4	5	4
2	1950	64	3	1	1	1	1	3	4	4	4	4	5	4	3	4	2	4	3	5	3	3	3	3	4	2	4	4	4	4	2	5	5	4	3	3	4	4	3	4	3	4	4	3	3	4	4	5	4
2	1985	29	1	1	1	2	1	3	2	5	5	4	5	5	5	4	2	4	3	5	2	5	2	5	5	1	3	3	5	4	3	4	3	5	4	2	1	5	4	5	4	5	4	5	2	5	4	4	3
2	1975	39	2	1	1	1	2	3	4	3	5	4	4	4	4	4	2	5	3	5	3	4	4	2	4	4	5	3	3	4	1	4	5	5	5	3	4	4	3	5	5	3	4	3	4	5	5	4	3
	1997	17	1	1	1	2	1		4		4	3	2			5	3	3	2	3	2	2	4	2	3	5	4	2	2	2	2	2	3	3	3	2	3	3	2	2	3	2	4	3	3	4	3	4	2
2	1995	19	1	1	1	4	1	4	2	2	5	5	1	5	5	5	4	4	4	5	2	1	5	1	2	5	5	1	5	4	1	4	2	5	4	5	5	5	2	4	2	3	4	3	2	5	5	5	5
2	1993	21	1	2	1	2	1	3	2	2	4	4	5	4	4	3	4	2	3	4	3	5	3	2	4	2	4	4	4	3	1	4	2	3	4	3	2	4	3	4	4	4	4	4	2	3	2	4	3
2	1990	24	1	1	1	2	1	3	2	4	4	4	4	4	4	4	2	4	3	4	4	4	2	4	4	4	4	2		3	2	2	4	3	3	1	4	2	2	3	4	4	4	4	4	2	3	4	1
2	1974	40	2	1	1	1	1	3	2	5	5	5	5	5	5	2	4	3	5	5	3	5	1	4	5	1	3	4	5	5	1	5	2	4	4	4	2	2	3	5	5	5	4	3	4	5	2	5	3
2	1963	51	2	1	2	1	2	2	2	4	5	5	5	5	5	2		2	3	5	4	2	1	5	5	2	4	2	5	5	1	5	4	4	3	3	2	3	1	4	4	4	4	5	2	5	4	4	3
2	1953	61	3	2	1	2	2	1	4	5	4	4	4	5	4	4	2		2	5	4	4	2	5	4	4	4	4	2	4	1	2	4	4	4	2	2	4	4	4	4	2	4	2	4	5	2	4	2
1	1948	66	3	1	1	3		2	2	2	2	3	4	4	3	4	4	2	3	4	3	2	3	3	2	2	2	3	3	4	2	3	2	4	2	2	2	4	2	4	3	4	4	3	3	4	2	2	3
2	1947	67	3	2	1	4		2	4	2	4	4	2	3	4	4	5	3	2	3	2	2	4	2	3	4	3	3	3	3	2	3	2	2	3	3	4	3	2	3	2	2	4	2	3	3	4	3	2
2	1986	28	1	1	1	1	2	3	4	3	4	4	2	4	2	5	2	4	2	4	2	2	4	3	2	3	4	2	3	4	4	3	4	3	4	1	3	2	1	5	5	2	4	3	2	5	5	3	1
2	1986	28	1	1	1	1	1	3	4	3	4	4	2	4	2	5	2	4	2	4	2	2	4	3	2	3	4	2	3	4	4	3	4	3	4	1	3	2	1	5	5	2	4	3	2	5	5	3	1
2	1953	61	3	1	1	4	2	3	3	4	3	3	3	3	4	4	3	2	3	3	3	2	3	2	3	4	4	2	3	3	1	2	4	2	3	4	4	4	2	3	3	2	4	2	4	4	4	3	1
2	1953	61	3	1	4	1	1	3	3	4	3	3	3	3	4	4	3	2	3	3	3	2	3	2	3	4	4	2	3	3	1	2	4	2	3	4	4	4	2	3	3	2	4	2	4	4	4	3	1
2	1989	25	1	1	1	2	1	2	2	5	5	3	3	5	2	4	2	3	2	5	2	2	4	5	4	4	4	3	4	5	3	4	4	4	2	2	4	4	1	5	4	3	4	4	2	4	4	4	1
1	1953	61	3	1	1	4		4	2	3	5	5	4	4	4	2	3	2	3	2	2	3	2	4	4	1	2	5	5	5	2	4	2	4	3	1	1	4	1	5	2	4	4	4	2	3	3	4	1
1	1935	79	3	2	2	2		1	2	4	4	3	3	4	4	4	2	2	3	4	3	5	4	3	4	2	4	3	3	4	4	4	4	4	5	3	4	4	2	5	3	3	4	1	4	4	4	4	2
2	1997	17	1	2	2	4	1	2	5	1	4	1	5	3	4	5	2	1	4	1	4	4	4	2	5	2	4	3	2	1	1	4	1	3	3	1	4	5	3	1	5	4	4	5	5	4	1	4	1
2	1941	73	3	1	1	2		3	3	2	4	4	3	4	4	2	4	2	3	4	2	2	4	4	3	3	4	2	4	4	1	3	4	3	3	3	4	3	2	3	4	4	4	4	3	4	4	2	3
2	1977	37	2	1	1	3	3	2	4	2	4	4	1	4	4	5	4	4	4	5	4	4	5	4	2	5	2	2	2	2	1	5	2	4	1	4	5	1	5	2	4	4	4	1	5	2	4	4	5
2	1955	59	3	1	1	2		4	2	4	5	4	5	4	4	4	2	3	4	4	4	2	2	4	4	2	2	4	4	4	3	4	2	4	4	4	3	4	2	4	4	2	4	4	2	4	4	3	4
1	1943	71	3	2	2	3		4	2	4	4	4	4	4	4	2	4	2	4	4	2	2	2	4	2	4	3	3	4	3	2	4	2	3	3	4	4	4	2	3	2	4	4	3	2	3	4	4	3
2	1945	69	3	1	1	4		3	2	2	3	2	3	4	3	2	4	4	3	5	2	3	4	2	2	4	4	2	4	3	4	3	2	5	3	3	4	4	4	5	3	4	4	3	3	5	5	4	3
2	1944	70	3	1	1	1		3	2	5	4	4	4	5	4	2	3	3	4	5	3	4	1	5	4	1	4	3	3	4	1	3	4	4	4	2	1	4	3	4	5	3	4	2	3	4	4	4	3
1	1936	78	3	1	1	2		4	2	5	4	5	4	5	5	2	4	2	3	5	2	2	1	4	5	1	4	5	4	4	1	4	4	5	2	3	1	3	2	4	5	4	4	5	1	4	4	4	3
2	1982	32	2	2	2	3	2	5	2	5	5	5	5	5	4	2	3	3	4	3	1	3	3	5	4	3	3	3	3	5	3	2	1	3	3	2	5	3	1	5	3	5	4	5	1	3	4	5	4
2	1982	32	2	2	3	1	1	5	2	5	5	5	5	5	4	2	3	3	4	3	1	3	3	5	4	3	3	3	3	5	3	2	1	3	3	2	5	3	1	5	3	5	4	5	1	3	4	5	4
2	1981	33	2	2	1	2	1	4	5	2	4	3	2	4	4	5	3	3	3	3	1	3	3	2	3	4	4	2	3	2	4	5	3	2	2	3	4	5	3	5	3	3	4	3	2	4	5	4	4
2	1960	54	2	2	2	4		4	3	4	4	4	4	4	4	5	3	3	3	4	4	4	2	4	4	2	4	2	4	4	4	2	4	4	4	2	3	4	2	2	4	4	4	4	3	5	4	4	2
2	1987	27	1	2	2	2	1	3	1	4	5	5	2	4	5	2	1	2	3	5	2	5	1	3	5	1	4	1	4	5	4	4	2	4	5	4	1	4	1	5	5	4	4	5	1	5	5	4	4
1	1958	56	3	1	1	2		3	2	5	5	4	5	5	4	2	2	3	4	3	2	4	2	5	5	1	4	3	4	5	1	4	4	4	4	3	1	3	2	3	5	4	4	3	1	4	5	4	3
2	1949	65	3	2	1	2		4	3	4	5	4	3	4	4	3	3	4	3	3	4	3	4	3	2	4	3	5	4	4	1	4	2	4	5	5	4	3	3	5	3	3	4	1	5	5	4	4	3
2	1990	24	1	2	1	2	1	2	5	3	4	4	4	4	2	5	2	3	2	5	4	5	3	4	5	5	4	4	3	4	2	3	4	5	4	2	4	4	2	4	5	2	4	4	4	5	4	3	1
2	1963	51	2	1	1	2	1	4	2	5	5	5	5	4	5	2	1	3	4	4	4	1	3	5	5	1	3	4	5	5	1	4	4	4	4	3	1	2	3	4	5	5	4	5	2	3	4	3	4
2	1953	61	3	2	1	4		2	3	5	4	3	5	4	4	2	2	4	4	5	4	4	1	5	5	1	1	5	3	5	1	3	3	4	5	3	2	2	2	5	5	3	4	2	3	5	4	4	3
2	1996	18	1	2	1	2	2	3	4	4	5	5	5	5	4	3	2	3	3	4	2	2	5	3	5	1	5	1	4	4	3	2	2	3	4	1	2	2	4	5	2	4	4	5	1	4	5	4	1
2	1996	18	1	1	2	1	1	3	4	4	5	5	5	5	4	3	2	3	3	4	2	2	5	3	5	1	5	1	4	4	3	2	2	3	4	1	2	2	4	5	2	4	4	5	1	4	5	4	1
2	1955	59	3	1	1	1		1	2	5	4	3	3	5	4	3	4	3	4	5	3	3	3	4	5	2	5	3	3	4	2	5	4	4	4	3	2	3	2	4	4	4	4	2	2	5	4	4	3
2	1947	67	3	1	1	2		3	4	3	4	4	4	4	4	4	3	2	3	5	3	4	2	3	4	4	4	3	4	3	4	2	5	5	5	1	4	3	3	4	3	3	4	4	5	5	1	4	1
2	1953	61	3	1	1	3		3	2	3	5	4	3	5	4	4	4	3	4	5	3	2	3	3	3	3	4	4	5	4	1	5	2	3	4	4	3	4	4	4	4	4	4	3	2	4	5	4	3
2	1951	63	3	1	1	4		4	2	3	4	4	3	4	4	2	2	3	4	4	3	4	3	5	4	2	5	4	4	4	1	3	4	4	4	3	1	4	4	4	4	4	4	2	2	4	4	5	3
1	1947	67	3	1	1	2		4	2	3	4	4	4	4	5	4	4	3	4	5	2	4	1	4	3	2	3	3	2	3	1	5	3	4	4	5	4	4	3	3	3	4	4	2	3	5	4	4	4
1	1944	70	3	1	1	2		4	3	5	4	4	5	5	4	2	3	3	4	4	3	4	2	5	3	3	4	3	4	3	1	5	2	3	3	4	3	4	2	4	3	5	4	4	2	4	3	3	3
1	1947	67	3	2	2	3		5	2	3	4	4	5	4	3	5	3	2	4	4	2	5	2	4	4	3	3	2	4	4	1	5	2	2	3	5	4	4	1	3	3	4	4	4	2	5	2	4	4
1	1954	60	3	1	1	3		4	2	4	4	4	4	4	4	2	3	3	4	4	3	4	2	4	4	3	4	3	3	4	2	3	4	4	4	4	4	2	5	4	4	4	4	3	2	4	4	4	4
2	1951	63	3	1	1	1	2	4	4	3	4	4	4	4	4	3	3	3	3	5	3	2	2	4	4	3	4	4	5	4	1	4	4	4	4	3	3	4	2	4	4	5	4	4	2	5	5	4	2
2	1951	63	3	1	1	1	1	4	4	3	4	4	4	4	4	3	3	3	3	5	3	2	2	4	4	3	4	4	5	4	1	4	4	4	4	3	3	4	2	4	4	5	4	4	2	5	5	4	2
2	1958	56	3	2	1	4	1	4	2	4	4	3	4	5	4	4	3	3	5	2	3	5	1	4	5	1	1	5	5	5	4	5	2	3	5	4	3	2	3	4	5	5	4	3	2	5	3	4	4
2	1948	66	3	1	1	2		4	3	4	4	4	4	4	5	3	3	3	4	5	3	4	2	4	4	2	3	3	4	4	1	3	3	3	4	3	2	3	3	4	4	4	4	3	3	4	4	4	4
2	1953	61	3	2	2	1		4	2	5	5	5	1	5	5	1	2	4	5	5	4	5	1	5	4	1	3	4	4	4	1	5	4	4	4	2	1	2	1	5	4	5	4	3	3	3	4	4	3
2	1982	32	2	1	2	4	1	2	1	5	5	4	5	5	4	3	1	5	4	5	4	5	1	4	5	1	5	3	5	5	4	5	3	5	4	5	1	4	2	5	4	5	4	4	1	5	4	5	3
2	1995	19	1	2	2	2	1	4	1	4	5	5	4	4	2	4	4	1	5	5	2	4	5	5	2	4	4	5	5	4	1	5	1	2	5	2	4	1	4	4	4	4	4	5	2	5	5	1	2
2	1983	31	2	2	1	2	1	1	2	4	4	5	4	5	5	2	4	2	3	4	4	5	4	4	5	1	4	4	5	4	1	2	4	4	4	1	1	2	2	5	4	5	4	5	2	5	5	2	1
2	1976	38	2	1	2	1	1	4	1	4	5	5	4	4	4	2	3	2	4	5	4	5	1	5	4	2	4	3	5	5	3	4	4	3	4	3	2	3	2	5	5	5	4	4	2	5	3	3	3
2	1971	43	2	1	2	1	1	4	2	4	4	5	4	4	4	3	2	2	4	5	4	4	2	4	4	2	4	4	3	4	2	5	4	2	4	4	2	2	4	5	4	5	4	3	4	5	5	4	4
2	1996	18	1	2	1	4	1	4	4	3	4	3	5	4	2	5	2	3	4	3	2	4	4	3	4	4	4	1	3	2	2	5	3	4	4	3	4	5	4	4	4	4	4	4	3	4	5	2	4
2	1954	60	3	2	1	1		4	3	3	5	4	3	4	4	3	2	3	3	5	3	4	3	3	4	3	3	4	4	5	1	4	3	4	5	4	3	4	3	5	4	4	4	3	2	5	4	4	4
2	1996	18	1	2	1	2	3	2	3	4	4	3	5	4	4	3	2	3	4	5	5	4	2	4	4	2	4	3	3	3	1	4	3	4	3	4	2	3	5	5	4	4	4	4	4	5	5	5	5
1	1954	60	3	1	1	2		3	2	5	5	4	5	5	4	2	4	2	5	2	3	4	3	5	4	1	3	5	5	5	1	4	2	2	5	5	2	3	5	5	5	5	4	3	2	4	5	4	5
2	1977	37	2	1	1	2	2	3	2	4	5	5	5	5	5	3	4	2	4	5	3	3	3	5	5	2	3	4	5	5	1	5	2	3	4	5	3	4	5	5	5	5	4	5	2	5	4	4	5
2	1997	17	1	2	2	2	3	4	2	3	5	4	5	5	4	4	3	3	4	4	1	3	3	2	2	3	4	2	4	3	1	4	2	3	4	5	2	3	4	4	2	5	4	5	2	4	5	3	5
2	1996	18	1	2	1	2	1	4	2	5	5	4	1	4	5	3	2	4	3	5	1	5	2	4	5	2	4	3	5	4	4	4	4	2	5	4	4	1	1	5	2	2	4	5	4	5	1	5	2
2	1995	19	1	2	1	4	1	4	3	4	4		3	4	4	3	2	3	3	5	3	5	3	3	4	3	4	3	3	2	3	3	4	3	2	4	4	3	2	4	3	3	4	3	3	4	3	4	3
2	1981	33	2	1	1	1	1	4	2	5	4	3	5	5	5	1	2	2	3	5	2	4	1	4	4	1	3	3	4	5	2	5	1	4	3	3	1	3	1	3	4	4	4	4	3	5	4	4	5
1	1996	18	1	2	1	2	1	5	3	4	3	4	3	3	3	2	2	2	3	3	1	3	3	4	4	3	2	3	4	4	3	4	2	2	3	2	4	2	1	2	4	3	4	4	2	3	2	4	3
1	1955	59	3	1	1	2	1	3	2	4	4	3	4	4	4	1	3	4	3	4	3	1	1	4	3	2	3	4	3	4	1	4	2	4	4	3	4	2	1	4	4	3	4	2	2	4	3	2	2
2	1992	22	1	1	2	2	1	2	4	4	4	2	5	5	2	4	4	2	4	5	2	2	2	2	2	4	4	1	4	5	4	4	2	4	2	2	4	2	2	4	4	4	4	4	2	5	4	4	5
2	1957	57	3	2	1	4	2	2	5	1	4	3	1	4	4	5	1	3	1	5	4	4	5	1	5	1	1	5	5	5	5	5	1	4	2	4	1	1	5	2	2	1	4	1	5	4	2	4	5
2	1957	57	3	1	4	1	1	2	5	1	4	3	1	4	4	5	1	3	1	5	4	4	5	1	5	1	1	5	5	5	5	5	1	4	2	4	1	1	5	2	2	1	4	1	5	4	2	4	5
1	1957	57	3	2	1	1	1	3	3	4	4	3	4	4	3	2	2	3	3	4	3	2	3	3	4	2	2	3	3	3	1	4	4	4	4	3	2	3	3	3	3	3	4	3	3	4	3	3	3
1	1957	57	3	1	1	2	2	3	3	4	4	3	4	4	3	2	2	3	3	4	3	2	3	3	4	2	2	3	3	3	1	4	4	4	4	3	2	3	3	3	3	3	4	3	3	4	3	3	3
2	1988	26	1	2	2	4	1	4	4	3	4	2	1	3	4	3	4	3	2	5	2	5	5	3	4	4	3	3	2	3	5	3	2	2	4	4	4	2	3	4	5	2	4	1	5	4	3	4	4
2	1944	70	3	2	1	4		3	4	2	5	3	3	4	1	4	4	4	3	5	2	2	5	1	4	5	5	3	2	3	4	3	3	5	5	3	4	3	2	5	2	3	4	3	3	5	4	5	3
2	1977	37	2	1	1	2	2	2	4	3	4	4	3	4	4	4	3	2	2	5	2	2	4	4	4	4	3	4	4	4	2	2	2	3	3	2	4	4	1	4	4	4	4	4	3	3	4	3	3
2	1977	37	2	1	2	1	1	2	4	3	4	4	3	4	4	4	3	2	2	5	2	2	4	4	4	4	3	4	4	4	2	2	2	3	3	2	4	4	1	4	4	4	4	4	3	3	4	3	3
1	1987	27	1	2	2	2	1	4	2	5	5	4	3	4	3	2	2	2	3	3	2	3	3	4	4	2	3	2	4	4	4	5	3	3	5	3	2	2	1	4	4	4	4	5	2	4	4	3	3
2	1961	53	2	2	1	2	2	2	4	3	4	3	2	4	3	4	4	3	3	5	2	4	4	2	4	4	3	3	3	2	3	4	3	3	4	4	5	2	2	5	3	2	4	1	4	3	5	4	4
2	1990	24	1	2	2	1	1	4	2	4	4	4	4	5	4	1	3	2	3	5	3	3	2	5	3	2	2	4	5	5	1	2	4	4	4	4	3	2	1	4	5	4	4	3	2	5	5	3	2
2	1962	52	2	1	1	2	2	4	2	3	4	5	5	4	4	2	3	3	4	3	4	4	1	4	4	3	4	3	4	4	1	4	2	4	4	3	1	3	1	3	4	3	4	2	2	5	4	4	3
2	1962	52	2	1	2	3	3	4	2	3	4	5	5	4	4	2	3	3	4	3	4	4	1	4	4	3	4	3	4	4	1	4	2	4	4	3	1	3	1	3	4	3	4	2	2	5	4	4	3
2	1946	68	3	1	1	4		4	2	3	3	4	4	4	4	2	4	3	4	5	4	4	2	4	3	2	4	3	4	4	2	4	3	3	3	3	2	3	3	3	3	3	4	3	4	3	3	3	3
2	1988	26	1	1	1	1	1	4	3	2	4	3	2	4	4	3	2	3	2	3	2	4	5	2	5	4	3	3	4	5	3	4	2	3	3	4	2	4	1	3	4	4	4	4	1	4	4	4	4
1	1945	69	3	1	2	3		4	3	3	4	4	3	4	4	2	4	3	4	3	2	3	3	2	4	2	4	3	4	4	2	3	4	3	4	4	3	4	4	4	3	3	4	3	2	4	3	3	3
2	1942	72	3	2	1	1		3	2	4	5	5	5	5	5	1	3	3	4	4	3	3	1	4	4	1	3	5	2	5	1	4	3	5	5	5	1	1	3	4	4	3	4	4	1	5	4	4	3
1	1957	57	3	1	2	4		3	2	3	4	5	4	4	5	2	1	5	3	4	1	2	2	4	5	2	3	5	5	5	1	5	2	5	5	3	4	3	3	2	4	4	4	5	1	5	3	3	3
2	1983	31	2	1	1	1	2	4	3	3	4	4	5	5	4	4	5	2	3	4	4	1	2	4	4	2	4	1	4	4	1	5	4	2	2	3	4	5	3	3	4	4	4	5	4	4	4	4	3
2	1983	31	2	1	1	3	3	4	3	3	4	4	5	5	4	4	5	2	3	4	4	1	2	4	4	2	4	1	4	4	1	5	4	2	2	3	4	5	3	3	4	4	4	5	4	4	4	4	3
2	1989	25	1	1	2	1	1	4	4	4	2	4	4	4	4	4	4	2	2	4	2	5	4	4	2	2	5	1	4	4	2	4	2	4	2	2	4	4	2	4	4	4	4	5	2	4	5	4	4
1	1949	65	3	1	2	3		4	1	4	4	4	4	4	5	2	3	2	4	4	3	5	2	4	3	3	4	4	4	4	1	3	3	4	2	3	3	4	4	4	4	4	4	3	2	4	3	3	4
2	1996	18	1	2	2	4	1	4	3	4	4	4	3	4	3	4	2	3	4	4	2	2	3	4	4	2	4	4	3	2	2	4	4	3	4	2	3	2	4	4	4	4	4	2	4	4	4	4	2
2	1951	63	3	1	2	2		4	2	5	4	5	5	4	4	2	2	2	3	5	3	4	2	4	4	1	3	3	4	5	4	5	2	3	4	4	1	3	1	4	4	4	4	4	2	5	4	4	3
2	1956	58	3	2	1	2		4	2	4	4	3	3	4	5	1	3	2	2	5	2	4	2	4	4	1	3	5	4	4	2	4	1	3	5	5	1	4	5	5	5	4	4	2	2	4	4	5	5
2	1986	28	1	2	1	1	2	3	4	2	5	4	2	4	3	2	3	4	3	4	2	3	4	3	5	1	4	3	3	3	3	3	4	4	4	3	4	4	4	5	3	4	4	5	3	4	4	4	3
2	1953	61	3	2	1	4		3	2	4	4	2	4	4	4	3	3	2	3	5	4	3	3	4	4	1	2	5	2	4	2	4	2	2	4	5	1	3	4	5	4	4	4	1	3	4	4	3	5
2	1983	31	2	1	1	1	2	3	2	4	4	4	4	4	4	4	3	3	3	5	3	3	3	3	4	3	3	3	3	3	1	4	3	4	3	3	4	2	3	3	4	4	4	4	3	3	3	3	3
2	1983	31	2	1	1	1	1	3	2	4	4	4	4	4	4	4	3	3	3	5	3	3	3	3	4	3	3	3	3	3	1	4	3	4	3	3	4	2	3	3	4	4	4	4	3	3	3	3	3
2	1946	68	3	2	2	3		4	2	4	4	4	5	4	4	1	4	4	4	3	4	4	1	4	4	2	4	3	4	5	1	3	4	3	4	3	3	3	4	4	4	4	4	4	2	4	4	4	3
2	1993	21	1	2	1	2	1	3	2	4	5	4	3	4	5	2	2	4	4	5	2	2	2	5	5	2	3	4	4	4	2	3	4	4	4	3	3	2	2	4	4	4	4	4	3	3	4	3	2
2	1990	24	1	2	2	2	1	4	1	4	5	3	4	4	4	2	3	3	4	5	4	5	2	4	4	1	4	3	3	3	1	3	3	4	4	4	2	4	3	4	3	5	4	4	2	4	4	4	3
1	1956	58	3	1	1	3		4	2	4	5	4	5	5	4	3	2	3	4	4	1	2	3	4	5	1	5	4	5	4	5	4	2	4	4	3	1	3	3	5	5	4	4	3	2	5	4	4	3
2	1956	58	3	1	1	4		4	2	3	4	4	4	5	4	4	3	1	4	4	3	1	2	3	3	3	4	3	4	3	1	5	2	3	5	3	4	3	4	3	4	4	4	2	3	3	2	4	5
1	1957	57	3	1	1	1		4	1	3	5	5	5	5	5	4	4	2	4	1	1	5	2	4	4	2	4	4	5	5	1	5	2	3	2	5	2	5	5	4	5	2	4	5	2	4	1	4	3
1	1943	71	3	1	2	3		4	2	2	3	5	5	5	5	3	3	2	3	3	4	4	2	2	4	2	4	4	5	4	2	3	3	4	4	3	1	3	3	2	3	5	4	3	3	4	2	3	3
2	1955	59	3	2	2	3		4	2	4	5	4	5	5	4	2	2	3	4	3	3	4	2	4	5	1	2	3	4	3	3	4	3	3	4	3	2	3	5	5	3	4	4	3	1	5	5	3	4
2	1973	41	2	1	1	1	1	5	2	5	5	5	5	5	4	1	2	3	4	5	3	3	3	5	4	1	3	3	4	4	2	1	2	4	4	4	2	4	2	5	5	5	4	4	1	5	5	3	3
2	1961	53	2	1	1	3	2	2	2	3	4	5	5	5	5	2	3	3	3	5	5	4	3	4	4	2	3	4	5	4	3	4	3	4	4	2	2	2	2	5	4	4	4	2	4	5	4	5	3
2	1961	53	2	1	3	1	1	2	2	3	4	5	5	5	5	2	3	3	3	5	5	4	3	4	4	2	3	4	5	4	3	4	3	4	4	2	2	2	2	5	4	4	4	2	4	5	4	5	3
2	1974	40	2	2	1	3	2	4	2	5	4	5	5	4	5	2	4	4	4	4	2	4	1	5	5	2	3	3	5	5	1	3	3	4	5	3	4	3	3	5	4	5	4	4	3	4	4	4	3
2	1974	40	2	1	3	1	1	4	2	5	4	5	5	4	5	2	4	4	4	4	2	4	1	5	5	2	3	3	5	5	1	3	3	4	5	3	4	3	3	5	4	5	4	4	3	4	4	4	3
2	1956	58	3	1	1	2	1	2	2	5	5	5	4	4	5	3	4	4	3	5	3	4	2	4	2	2	4	5	4	5	1	5	2	4	5	2	3	4	2	4	3	3	4	4	5	4	1	4	1
2	1944	70	3	2	2	2		5	2	3	4	5	1	5	4	3	4	1	5	4	2	5	4	4	3	2	2	4	4	4	1	5	2	2	4	4	3	5	3	5	4	4	4	2	2	4	5	5	3
2	1955	59	3	1	2	2		4	2	5	5	5	4	5	4	3	3	2	4	5	3	4	2	4	4	2	4	5	4	4	3	4	2	5	4	3	3	3	5	5	3	3	4	3	4	4	4	4	3
2	1989	25	1	1	1	1	1	5	4	5	4	5	2	4	4	4	4	4	3	5	4	4	3	4	4	2	5	4	3	4	2	4	5	5	4	4	2	3	3	5	4	4	4	4	4	5	5	4	3
2	1963	51	2	1	2	3	1	4	2	4	5	4	5	5	4	2	2	3	4	5	4	4	2	5	4	3	4	3	4	4	2	4	2	4	4	3	4	4	5	5	4	4	4	3	2	5	5	4	2
2	1973	41	2	1	1	2	1	4	2	5	4	3	5	4	4	2	2	4	5	5	3	2	2	2	5	2	5	4	4	4	1	3	4	4	4	4	4	4	2	5	4	4	4	4	2	5	5	4	5
2	1953	61	3	2	1	1		4	2	3	4	4	5	5	4	3	4	2	5	5	4	4	2	5	5	1	3	4	4	4	1	5	4	5	4	3	2	3	4	5	3	4	4	4	4	5	4	5	4
1	1992	22	1	2	1	2	1	3	4		4	4	4	2	2	1		2	3	4	4	2	2	4	4	2	4	1	3	4	2	4	3	2	2	4	4	1	2	4	2	4	4	3	4	4	4	5	4
2	1961	53	2	1	2	1	1	2	4	3	4	3	2	4	3	4	4	3		5	2	4	4	2	4	4	3	3	3	2	3	4	3	3	4	4	5	2	2	5	3	2	4	1	4	3	5	4	4
2	1961	53	2	2	1	2	1	2	2	3	5	5	4	5	5	2	3	4	3	4	4	4	2	4	4	2	2	5	5	5	3	4		4	4	1	4	2	1	4	3	4	4	3	3	5	2	3	1
2	1994	20	1	1	2	1	2	4	2	4	5	5	5	5	5	3	4	3	4	5	3	3	2	4	4	1	3	5	4	4	1	3	3	3	2	3	1	3	3	5	4	5	4	4	3	5	5	4	3
2	1996	18	1	2	1	2	2	4	1	3	4	5	4	4	3	3	3	5	2	5	3	2	1	5	2	3	5	3	4	2	2	5	3	3	5	4	3	1	4	4	3	3	4	5	4		1	2	3
2	1988	26	1	2	2	1	1	4	3	4	3	3	2	4	3	3	4	2	4	4	4	4	4	4	5	2	4	2	3	4	1	2	4	2	3	2	2	2	1	2	4	3	4		3	2	2	5	3
2	1982	32	2	1	1	1	1	2	4	5	4	3	4	3	4	4	3	3	2	5	3	4	3	3	3	2	4	3	3	4	3	3	2	4	3	2	3	3	3	4	4	4	4	3	4	4	5	4	3
2	1980	34	2	1	1	1	1	2	2	4	4	4	5	4	4	3	2	4	3	5	3	4		3	4	2	4	3	3	4	3	4	4	4	4	3	2	4	3	5	4	4	4	3	3	4		4	3
2	1977	37	2	1	1	1	1	4	2	4	4	5	2	3	4	2	5	1	2	4	2	1	2	4	4	2	1	4	5	5	1	4	2	2		2	2	1	1	3	4	4	4	5	3	3	2	4	1
2	1976	38	2	2	1	1	1	4	2	3	4	4	5	4	5	3	1	3	4	5	2	3	3	5	4	1	3	3	4	5	2	5	3	4	4	5	2	4	5	5	4	5	4	3	1	5	4	4	5
2	1975	39	2	2	1	2	1	4	2	5	5	4	1	4	4	2	2	2	3	5	3	2	3	4	4	2	3	3	5	4	1	4	1	4	4	4	3	2	3	4	4	3	4	3	2	4	4	4	3
2	1969	45	2	1	1	1	2	3	4	3	4	5	4	5	4	2	3	1	2	5	4	3	3		4	1	4	4	4	4	2	4	4	4	3	3	1	2	1	4	4	3	4	3	3	4	4	4	2
2	1983	31	2	2	1	2	2	3	4	4	4	3	3	3	3	2	2	3	2	5	3	3	4	5	4	1	3	4	1	3	1	3	4	2	2	1	2	2	2	2	3	3	4	2	2	4	1	4	1
2	1983	31	2	1	2	2	2	3	4	4	4	3	3	3	3	2	2	3	2	5	3	3	4	5	4	1	3	4	1	3	1	3	4	2	2	1	2	2	2	2	3	3	4	2	2	4	1	4	1
2	1984	30	1	1	1	2	1	4	3	3	5	4	2	4	2	2	3	2	2	4	1	1	4	2	2	4	2	4	3	4	1	3	4	3	4	2	4	1	1	4	4	4	4	4	2	5	4	4	1
2	1962	52	2	1	2	3		2	4	5	4	4	5	3	3	2	5	2	4	5	2	2	1	4	2	1	2	3	3	5	1	3	1	3	2	5	1	3	5	5	5	3	4	4	4	5	2	5	3
2	1964	50	2	1	1	1	1	4	2	4	4	2	3	5	2	2	1	2	3	5	3	2	3	2	4	2	4	3	2	5	1	5	3	4	4	4	2	3	1	4	2	4	4	3	3	4	4	4	4
2	1989	25	1	2	1	2	1	3	2	2	4	4	4	5	3	3	2	3	2	3	3	3	4	4	4	3	4	3	4	3	3	3	2	3	3	2	2	3	3	3	4	3	4	4	2	4	4	2	1
2	1986	28	1	1	1	1	2	1	2	4	3	2	3	2	4	3	2	4	4	4	4	4	3	3	4	2	4	5	4	3	1	4	4	2	3	4	2	5	4	4	4	2	4	3	3	5	2	3	5
2	1986	28	1	1	1	3	3	1	2	4	3	2	3	2	4	3	2	4	4	4	4	4	3	3	4	2	4	5	4	3	1	4	4	2	3	4	2	5	4	4	4	2	4	3	3	5	2	3	5
1	1966	48	2	1	1	1		4	3	2	4	3	3	4	4	4	4	4	2	4	3	2	2	3	3	4	4	2	4	4	1	4	3	2	4	2	4	4	1	4	4	4	4	4	2	4	4	2	2
1	1952	62	3	2	1	3		3	2	2	4	3	3	4	3	3	3	3	3	3	2	3	4	2	4	2	4	2	4	3	3	4	4	3	4	3	2	4	2	3	3	3	4	3	2	4	4	2	2
1	1969	45	2	1	2	3	2	4	3	4	4	4	5	4	5	2	3	2	3	5	2	3	1	5	4	2	2	4	4	5	2	5	2	4	3	5	2	2	1	2	4	5	4	5	2	4	2	3	1
1	1983	31	2	1	1	4	1	2	2	4	4	3	3	5	3	3	2	3	3	5	3	4	4	4	3	3	4	4	3	4	1	3	4	4	3	3	3	3	1	4	4	2	4	2	3	4	4	3	3
2	1988	26	1	2	1	2		4	4	4	5	5	4	4	4	2	2	2	4	4	2	4	2	4	4	2	2	4	4	4	4	2	2	4	4	4	4	4	2	4	4	4	4	4	2	4	4	4	3
2	1995	19	1	2	1	4	2	4	3	4	5	3	4	4	4	2	4	3	3	4	4	5	2	4	4	2	4	3	3	2	2	3	4	5	4	5	2	3	4	3	3	3	4	2	2	4	4	4	3
2	1950	64	3	2	2	3		4	2	4	4	4	4	4	4	3	4	4	3	4	4	4	3	4	4	2	4	3	3	3	2	4	4	4	3	4	2	3	3	4	4	4	4	2	2	4	4	3	4
1	1994	20	1	2	2	2	1	4	1	5	4	2	4	4	3	2	2	4	4	4	4	4	2	5	4	4	4	2	4	4	1	3	2	4	5	3	4	4	2	4	4	3	4	3	2	5	3	4	3
1	1985	29	1	2	1	3	1	3	4	4	4	4	2	4	3	4	4	4	3	4	3	3	4	3	2	4	3	3	3	2	3	4	4	3	4	3	4	3	2	4	3	4	4	3	4	4	4	4	3
1	1937	77	3	1	1	3		2	2	3	4	5	3	4	4	3	4	2	3	4	4	4	2	3	4	2	3	2	4	4	3	4	4	3	4	1	2	4	3	4	3	3	4	4	2	5	3	3	3
1	1959	55	2	1	2	4		3	5	4	5	1	3	4	5	4	3	2	4	3	3	4	2	1	5	1	4	5	1	3	4	3	5	2	5	3	3	3	3	3	3	5	4	3	3	5	4	4	3
2	1959	55	2	2	1	1		3	2	3	5	5	2	5	5	3	4	2	5	5	2	3	1	3	4	3	3	4	5	4	1	5	1	3	4	4	3	3	2	4	4	4	4	4	2	4	4	4	5
2	1990	24	1	2	1	2	1	2	5	4	4	2	3	5	4	4	3	4	4	4	2	3	3	5	4	4	4	3	4	4	4	3	4	4	3	2	4	4	2	1	4	4	4	2	3	5	3	4	3
2	1956	58	3	1	1	4		3	2	4	4	4	3	4	4	2	3	2	4	4	2	2	3	3	4	2	4	2	2	3	4	3	2	2	4	2	4	4	4	3	4	4	4	3	2	2	4	4	3
2	1989	25	1	1	1	1	1	4	2	4	5	5	4	4	3	3	2	3	4	4	3	2	2	4	3	4	4	4	5	4	1	4	3	4	4	4	4	3	2	4	4	4	4	4	3	4	4	4	4
1	1952	62	3	2	2	4		2	2	3	4	4	2	3	4	4	3	2	3	5	3	3	4	4	4	2	4	3	4	3	1	4	2	4	4	4	3	3	2	2	3	3	4	3	2	4	3	4	3
1	1950	64	3	1	1	2		3	2	5	4	3	5	4	4	2	2	2	4	5	3	2	2	4	4	3	2	4	4	4	1	4	3	4	3	4	4	4	2	3	3	4	4	3	3	5	4	3	3
1	1947	67	3	1	1	3		4	2	3	4	4	4	4	4	3	3	3	4	4	3	4	1	3	3	1	5	2	4	3	2	4	3	3	4	3	1	4	2	4	3	3	4	3	2	3	4	3	4
2	1944	70	3	2	2	2		5	2	1	3	4	4	4	5	3	2	2	4	5	3	4	1	4	3	2	3	4	3	3	1	4	4	3	2	3	4	4	3	4	3	5	4	2	2	4	5	3	2
2	1944	70	3	1	1	2		3	2	3	4	4	5	4	2	4	3	3	4	5	2	2	3	3	4	3	4	4	3	4	1	4	4	4	5	3	2	3	3	4	4	3	4	2	4	5	5	3	3
2	1989	25	1	1	1	1	1	4	2	4	5	4	4	4	4	3	2	3	3	5	2	1	2	4	3	4	4	4	5	4	2	4	3	3	4	4	4	2	2	4	4	4	4	4	3	4	4	4	4
2	1961	53	2	1	2	2		1	5	4	5	2	1	4	5	3	1	2	3	4	3	4	4	1	4	2	4	2	3	4	3	4	3	2	4	3	3	5	2	4	4	4	4	3	4	4	5	4	3
2	1979	35	2	1	2	1	2	4	2	4	5	5	4	5	2	4	2	2	4	5	1	4	1	5	4	3	4	4	5	5	2	4	1	4	5	2	4	4	2	5	4	4	4	5	2	4	3	4	1
2	1979	35	2	2	1	1	1	4	2	4	5	5	4	5	2	4	2	2	4	5	1	4	1	5	4	3	4	4	5	5	2	4	1	4	5	2	4	4	2	5	4	4	4	5	2	4	3	4	1
2	1953	61	3	2	1	2		4	2	5	4	5	5	4	4	1	4	2	4	5	1	3	1	5	3	1	4	3	4	4	1	4	2	2	5	2	2	3	3	5	5	4	4	3	2	5	5	4	2
2	1951	63	3	2	1	4		3	2	3	4	4	3	5	4	3	3	3	4	5	3	4	3	3	3	3	4	2	4	4	2	4	3	3	4	4	3	4	2	3	2	4	4	3	2	4	4	4	3
2	1951	63	3	2	2	4		4	1	4	5	5	5	4	5	3	4	2	4	4	1	2	1	4	5	3	4	2	3	3	2	3	2	2	4	3	4	5	1	2	3	5	4	5	2	2	5	5	3
2	1980	34	2	2	1	2	1	4	2	5	5	5	4	5	4	1	3	4	4	4	3	3	1	3	5	1	4	5	5	5	2	5	2	4	5	3	2	2	4	5	5	5	4	5	2	5	1	4	2
1	1941	73	3	1	1	2		4	4	4	4	4	5	5	4	3	3	2	2	5	4	4	4	4	4	2	4	5	2	5	1	4	2	4	4	5	1	4	1	3	4	5	4	2	3	4	4	2	4
2	1953	61	3	1	2	3		5	2	3	4	5	4	4	5	2	4	2	3	5	2	4	3	5	4	3	4	4	5	5	1	4	2	3	4	3	4	3	3	3	4	4	4	1	2	4	4	3	1
2	1951	63	3	2	1	2		4	2	3	4	4	4	5	5	2	2	3	5	4	2	5	2	4	4	2	4	4	4	4	1	4	4	4	4	2	2	4	5	4	4	5	4	3	3	4	4	4	5
2	1954	60	3	1	2	2		3	3	4	4	4	4	4	3	3	4	3	3	5	2	4	4	4	3	3	4	4	3	3	1	4	4	5	4	4	4	5	3	4	4	3	4	3	3	5	4	4	2
2	1984	30	1	2	1	2	1	3	2	4	4	4	5	4	3	2	2	4	3	5	3	4	1	5	4	2	4	3	4	4	1	3	4	4	4	3	2	3	3	4	5	4	4	4	4	4	4	4	3
2	1954	60	3	1	2	2		4	2	4	5	3	5	5	4	5	5	2	4	5	3	2	1	4	4	1	5	1	3	4	1	3	4	4	4	5	2	2	5	4	4	4	4	1	1	4	4	5	5
2	1948	66	3	2	2	4		3	2	4	5	4	4	4	5	4	2	4	3	5	2	3	2	5	4	4	3	4	5	4	3	4	3	2	5	3	4	4	4	5	4	4	4	2	2	2	4	4	3
2	1980	34	2	1	1	1	2	2	2	4	4	4	5	4	4	3	2	4	3	5	3	4	3	3	4	2	4	3	3	4	3	4	4	4	4	3	2	4	3	5	4	4	4	3	3	4	3	4	3
2	1953	61	3	1	2	3		3	2	3	5	4	4	5	4	4	3	3	4	5	4	5	3	4	5	1	4	2	4	4	3	5	4	4	4	3	3	4	1	4	5	5	4	4	4	5	5	5	3
2	1956	58	3	1	1	2		4	2	4	5	4	4	5	4	3	2	3	4	5	3	3	4	4	4	3	5	3	5	5	1	4	3	4	4	5	2	4	4	4	3	4	4	3	3	4	4	4	5
2	1975	39	2	1	1	2	1	3	4	2	5	5	4	4	3	4	4	1	4	5	2	2	4	2	5	4	4	3	3	5	1	5	2	4	4	5	5	5	2	4	4	4	4	2	2	5	5	5	4
2	1952	62	3	2	2	3		3	3	5	4	4	5	4	5	1	2	4	4	5	4	4	1	5	5	1	3	5	5	5	1	4	3	4	4	5	1	2	4	5	4	5	4	3	3	4	1	4	3
2	1980	34	2	1	1	1	2	4	1	5	5	5	5	5	5	4	5	2	4	5	2	4	2	5	5	1	5	3	5	5	3	4	4	3	4	3	5	5	2	5	3	5	4	4	4	5	5	5	4
2	1955	59	3	2	1	3		4	3	5	5	3	5	4	5	1	2	3	5	5	3	3	1	5	5	1	2	5	1	5	1	5	4	5	5	5	2	5	5	5	5	5	4	1	4	5	3	4	4
2	1982	32	2	1	1	3	1	4	1	5	5	4	3	4	4	3	4	2	4	4	3	4	2	1	4	1	3	4	4	4	1	4	2	2	4	4	4	4	3	3	3	4	4	4	4	5	4	4	4
2	1997	17	1	1	2	2	1	2	4	2	4	3	2	4	4	5	2	4	3	3	2	4	4	2	4	2	5	2	3	2	2	4	4	4	4	3	2	5	2	2	4	4	4	4	4	5		4	1
2	1986	28	1	1	2	4	1	3	4	3	5	5	4	4	5	4	3	2	5	4	3	3	4	2	3	5	3	3	5	5	3	4	2	4	5	3		2	2	3	4	5	4	5	2	5	5	4	3
1	1982	32	2	1	1	1	1	4	2	2	3	3	2	3	3	3	3	3	3	3	2	4	4	2	2	4	2	4	2	4	2	2	4	3	3	3	3	3	3	3	4	2	4	2	4	4	2	3	3
2	1977	37	2	1	1	2	1	4	1	3	4	4	4	4	5	5	4	2	4	4	4	4	2	4	2	4	5	1	5	2	1	3	4	4	1	4	5	2	2	2	4	5	4	5	3	4	2	2	3
2	1964	50	2	1	1	1	1	4	2	3	4	4	4	5	4	1	2	4	4	5	4	3	1	4	4	1	4	2	4	3	4	4	4	5	4	4	1	4	2	4	3	4	4	3	2	5	5	3	2
2	1959	55	2	1	1	2	2	4	4	3	4	5	4	5	5	4	3	4	2	3	4	2	1	4	2	2	3	4	4	4	1	2	3	4	4	1	3	5	1	3	3	2	4	2	2	3	4	4	1
2	1954	60	3	1	4	1	1	2	2	5	4	5	5	5	5	1	1	4	3	5	5	1	1	5	5	1	4	3	4	4	1	1	4	5	5	1	2	2	2	3	3	4	4	4	2	5	1	4	1
2	1991	23	1	1	1	2	2	4	3	3	4	2	4	4	3	2	4	2	3	4	2	2	3	4	3	4	3	3	2	3	1	4	2	2	3	3	4	2	2	3	2	3	4	4	1	4	3	4	4
2	1991	23	1	1	2	1	1	4	3	3	4	2	4	4	3	2	4	2	3	4	2	2	3	4	3	4	3	3	2	3	1	4	2	2	3	3	4	2	2	3	2	3	4	4	1	4	3	4	4
1	1952	62	3	1	1	3		3	2	5	4	3	4	4	3	3	4	3	2	4	3	4	2	3	3	3	4	3	5	4	1	3	2	2	4	2	3	3	2	3	2	4	4	3	2	5	2	3	1
2	1940	74	3	1	1	3		4	2	3	2	4	3	5	3	4	5	1	3	2	1	2	3	3	2	2	1	3	5	5	1	3	1	1	3	3	2	1	1	3	4	3	4	5	1	3	4	4	5
1	1940	74	3	2	1	3		3	3	2	4	3	2	3	4	3	4	2	3	4	3	3	4	3	3	2	4	2	3	3	2	4	3	3	3	2	3	3	2	4	3	3	4	3	4	3	3	3	2
2	1976	38	2	2	1	2	2	2	2	5	5	5	4	4	4	1	3	3	3	4	1	1	4	3	2	4	4	4	4	4	1	2	2	3	4	1	4	1	2	5	4	3	4	3	3	4	4	4	1
2	1976	38	2	1	2	1	1	2	2	5	5	5	4	4	4	1	3	3	3	4	1	1	4	3	2	4	4	4	4	4	1	2	2	3	4	1	4	1	2	5	4	3	4	3	3	4	4	4	1
1	1945	69	3	1	1	3		3	3	5	4	4	3	4	3	2	4	2	2	5	3	3	2	4	4	3	4	4	4	4	1	3	4	3	4	1	3	4	2	4	4	3	4	4	2	5	4	3	1
2	1995	19	1	2	1	2	2	4	4	2	4	3	4	4	3	4	2	2	4	4	4	1	3	4	2	4	4	2	3	3	1	4	4	3	4	4	4	4	2	3	4	4	4	4	3	5	2	4	2
2	1995	19	1	1	2	1	1	4	4	2	4	3	4	4	3	4	2	2	4	4	4	1	3	4	2	4	4	2	3	3	1	4	4	3	4	4	4	4	2	3	4	4	4	4	3	5	2	4	2
2	1984	30	1	1	1	2	2	4	3	5	4	3	2	4	2	4	2	3	3	5	3	4	4	3	4	3	3	4	4	4	1	4	4	3	4	4	3	4	2	4	4	2	4	3	4	4	4	3	3
2	1984	30	1	1	2	1	1	4	3	5	4	3	2	4	2	4	2	3	3	5	3	4	4	3	4	3	3	4	4	4	1	4	4	3	4	4	3	4	2	4	4	2	4	3	4	4	4	3	3
1	1948	66	3	1	1	3		4	2	3	4	4	4	4	4	4	3	3	3	3	2	5	3	4	4	2	3	5	4	4	1	3	4	3	4	3	2	4	1	3	3	4	4	3	2	5	4	2	3
2	1964	50	2	1	1	1	2	4	2	3	4	4	4	5	4	1	2	4	4	5	4	3	1	4	4	1	4	2	4	3	4	4	4	5	4	4	1	4	2	4	3	4	4	3	2	5	5	3	2
2	1959	55	2	1	1	1	2	4	4	3	4	5	4	5	5	4	3	4	2	3	4	2	1	4	2	2	3	4	4	4	1	2	3	4	4	1	3	5	1	3	3	2	4	2	2	3	4	4	1
2	1990	24	1	2	1	2	2	3	4	3	3	5	4	4	4	4	2	3	2	5	4	4	2	2	2	3	3	3	4	2	2	4	5	3	3	3	2	2	3	3	3	4	4	3	4	3	5	3	4
2	1950	64	3	1	2	3		3	2	2	4	5	2	4	5	3	2	3	4	4	4	3	3	2	4	3	4	1	4	4	2	2	3	3	4	3	2	3	2	3	3	4	4	4	2	5	4	2	1
2	1993	21	1	1	1	2	2	4	3	2	4	4	2	4	3	5	2	2	2	4	3	4	5	4	1	5	4	3	4	4	1	5	4	3	4	2	5	4	2	3	2	5	4	5	2	5	2	2	2
2	1948	66	3	2	1	1		4	4	4	5	4	4	4	5	2	4	3	3	5	2	2	2	4	4	1	4	4	4	5	1	3	2	4	4	3	2	1	3	4	4	4	4	4	4	4	4	3	1
2	1991	23	1	2	2	2	2	5	2	4	3	4	5	4	3	2	3	2	5	4	1	2	1	4	3	2	4	3	4	5	1	4	2	4	3	4	3	5	2	5	4	3	4	5	2	5	1	2	2
2	1991	23	1	2	2	1	1	5	2	4	3	4	5	4	3	2	3	2	5	4	1	2	1	4	3	2	4	3	4	5	1	4	2	4	3	4	3	5	2	5	4	3	4	5	2	5	1	2	2
2	1954	60	3	2	1	4	2	2	2	5	4	5	5	5	5	1	1	4	3	5	5	1	1	5	5	1	4	3	4	4	1	1	4	5	5	1	2	2	2	3	3	4	4	4	2	5	1	4	1
2	1963	51	2	1	1	3		3	3	3	4	4	3	4	4	2	4	2	3	5	3	4	4	3	3	4	3	3	4	3	1	3	3	4	4	3	3	4	3	4	4	4	4	4	4	5	4	4	3
2	1987	27	1	2	1	2	2	3	4	4	5	5	4	5	4	1	2	3	3	5	3	3	2	4	5	2	3	3	4	5	3	4	3	3	3	4	3	2	1	5	4	3	4	4	3	2	3	4	3
2	1992	22	1	2	1	2	1	3	5	4	5	4	5	4	3	3	3	4	1	5	2	4	4	4	5	2	4	3	4	4	1	4	1	4	4	1	3	2	5	4	3	3	4	4	3	5	4	5	3
2	1982	32	2	1	2	1	2	4	3	5	4	4	4	4	4	1	2	3	3	5	4	4	2	3	4	2	3	4	4	4	1	3	3	4	3	3	2	3	1	5	5	4	4	3	2	5	4	4	2
2	1982	32	2	2	1	1	1	4	3	5	4	4	4	4	4	1	2	3	3	5	4	4	2	3	4	2	3	4	4	4	1	3	3	4	3	3	2	3	1	5	5	4	4	3	2	5	4	4	2
2	1974	40	2	1	1	2	1	4	3	3	5	4	3	2	5	3	3	4	4	5	4	3	4	5	4	2	1	1	3	4	1	1	5	2	5	3	3	5	5	5	3	4	4	3	2	3	2	3	4
2	1952	62	3	1	1	4		4	3	4	2	4	4	4	4	2	4	5	2	5	4	3	2	5	5	1	5	2	4	4	1	4	4	5	5	3	2	3	3	3	4	3	4	2	3	4	2	4	2
2	1983	31	2	1	1	1	2	4	3	3	2	4	4	4	4	4	4	1	4	2	2	1	3	4	4	4	4	5	4	4	1	4	4	2	2	4	5	3	4	2	4	4	4	5	2	2	3	4	3
2	1983	31	2	1	1	1	1	4	3	3	2	4	4	4	4	4	4	1	4	2	2	1	3	4	4	4	4	5	4	4	1	4	4	2	2	4	5	3	4	2	4	4	4	5	2	2	3	4	3
2	1948	66	3	2	1	2		4	2	4	4	4	4	4	4	2	2	3	3	5	3	4	3	4	3	3	3	4	3	4	2	4	3	3	4	3	3	4	3	3	3	4	4	3	3	4	3	4	3
2	1937	77	3	2	1	2		3	2	4	4	3	3	3	3	4	4	2	3	4	2	4	3	3	4	3	2	2	4	3	1	4	2	3	3	4	4	4	4	5	3	3	4	2	3	3	4	4	4
1	1951	63	3	1	1	2		4	3	4	4	4	4	4	5	3	3	4	4	5	4	4	3	5	4	1	3	5	3	4	3	3	3	3	4	3	2	3	2	5	4	3	4	2	3	4	3	2	3
2	1985	29	1	2	1	1	2	3	3	5	5	4	4	4	4	4	3	2	3	5	2	3	4	3	4	4	4	2	5	3	1	5	4	3	4	3	5	4	1	3	5	4	4	4	4	5	4	4	3
2	1985	29	1	1	1	1	1	3	3	5	5	4	4	4	4	4	3	2	3	5	2	3	4	3	4	4	4	2	5	3	1	5	4	3	4	3	5	4	1	3	5	4	4	4	4	5	4	4	3
2	1951	63	3	1	1	4		2	3	3	3	3	3	4	4	3	3	3	4	3	3	4	3	4	3	2	4	3	4	3	4	3	2	3	4	3	2	5	2	3	3	4	4	3	4	3	4	4	3
1	1951	63	3	1	1	4		4	2	5	5	5	5	5	5	3	3	4	4	3	5	5	1	4	3	1	5	3	5	3	1	3	5	4	4	3	1	1	1	4	3	4	4	4	3	4	4	4	3
2	1993	21	1	2	2	2	1	3	2	4	4	4	3	4	2	5	4	2	2	5	3	2	5	2	1	5	4	3	4	2	2	4	5	4	2	4	4	5	2	4	3	4	4	2	5	2	4	5	4
2	1948	66	3	2	2	2		4	2	4	5	3	5	5	4	3	3	2	4	5	3	3	1	5	5	2	5	4	3	5	1	4	3	3	4	3	3	3	4	4	5	4	4	3	2	5	4	4	2
2	1944	70	3	1	1	4		4	2	2	5	4	4	4	5	3	4	3	4	4	3	4	3	4	4	2	4	4	4	4	2	4	4	4	4	2	2	4	3	4	4	4	4	4	3	4	4	4	2
1				1	1	3		4	2	4	4	4	5	4	4	3	4	3	4	4	2	4	3	3	3	2	3	3	4	3	1	4	3	3	3	3	3	4	4	4	4	4	4	4	3	2	4	3	3
1	1940	74	3	1	1	4		3	2	3	4	5	5	5	5	2	3	2	4	5	4	3	1	5	5	1	4	5	5	4	1	5	3	2	5	3	2	4	3	3	3	5	4	4	3	1	4	4	3
2	1986	28	1	1	1	2	2	5	2	3	4	4	4	4	4	4	3	2	3	4	3	5	4	4	4	3	4	3	4	4	1	3	4	4	3	3	2	4	3	2	4	4	4	4	4	4	4	4	3
2	1986	28	1	1	2	3	3	5	2	3	4	4	4	4	4	4	3	2	3	4	3	5	4	4	4	3	4	3	4	4	1	3	4	4	3	3	2	4	3	2	4	4	4	4	4	4	4	4	3
2	1978	36	2	2	1	1		4	2	5	4	5	4	4	3	2	3	2	4	4	4	4	2	5	4	1	5	3	4	4	1	4	2	4	4	3	1	4	2	3	5	5	4	5	3	4	4	5	3
2	1972	42	2	1	1	1		3	2	5	4	5	1	4	4	2	3	3	4	5	4	3	2	5	5	1	2	4	5	5	1	5	3	3	4	4	1	4	3	5	5	5	4	3	3	4	3	3	4
2				1	2	2		4	2	5	3	2	5	3	4	2	4	4	3	3	5	5	2	3	5	1	4	5	5	3	1	2	4	5	5	4	1	2	4	5	5	4	4	3	2	5	5	4	1
2	1972	42	2	1	1	2	2	3	2	4	4	4	4	5	4	4	2	4	2	5	3	4	2	3	5	2	4	4	3	5	1	4	5	4	4	2	2	2	2	5	4	5	4	4	3	5	5	5	2
2	1972	42	2	1	2	1	1	3	2	4	4	4	4	5	4	4	2	4	2	5	3	4	2	3	5	2	4	4	3	5	1	4	5	4	4	2	2	2	2	5	4	5	4	4	3	5	5	5	2
2	1989	25	1	1	1	1	1	4	3	3	4	4	4	5	5	3	2	3	3	5	3	5	2	4	4	2	4	2	4	4	1	4	4	4	3	3	3	2	2	3	3	4	4	4	3	5	1	4	3
2	1946	68	3	2	2	4		3	2	4	4	5	5	5	5	1	4	2	4	5	5	4	3	5	5	1	2	4	4	5	1	3	3	3	5	3	1	4	3	3	3	4	4	4	4	4	3	4	2
2	1990	24	1	1	2	3	1	4	2	4	5	5	4	5	5	2	4	3	4	5	3	5	3	4	5	2	4	3	5	5	1	3	2	4	5	3	3	3	2	5	5	5	4	3	2	5	5	5	3
2	1945	69	3	2	1	4		4	2	4	5	4	5	4	4	4	4	2	4	5	3	5	3	5	5	4	4	4	4	3	1	4	5	3	5	3	2	2	2	3	4	4	4	4	2	4	4	4	3
2	1954	60	3	1	2	4		4	2	5	5	5	5	5	3	3	4	3	4	5	3	4	1	4	4	1	4	3	5	4	2	4	2	4	4	5	3	3	3	5	4	5	4	2	2	5	5	4	5
2	1948	66	3	1	1	1		4	2	5	4	5	5	5	5	1	2	2	4	5	4	5	2	5	5	1	1	5	5	5	1	4	2	4	4	3	1	1	2	5	5	5	4	3	3	5	5	4	2
2	1950	64	3	1	1	2		3	2	5	5	4	5	5	4	2	2	4	4	5	3	4	1	4	5	1	5	5	5	4	2	4	3	5	4	3	3	4	3	5	4	3	4	2	4	5	5	4	3
1	1959	55	2	1	1	4		3	3	5	4	3	5	4	4	2	2	3	3	5	3	5	2	5	4	1	4	3	4	4	1	5	3	4	5	5	2	3	5	4	5	5	4	3	2	5	4	3	5
2	1988	26	1	1	1	1	2	3	4	5	5	4	5	4	4	4	2	2	3	5	3	5	4	5	5	3	4	5	4	5	2	3	4	4	3	2	4	4	2	4	4	4	4	5	4	5	4	4	3
2	1993	21	1	2	1	1	1	2	5	4	4	5	5	4	5	4	4	4	3	5	2	2	2	4	4	2	5	1	5	5	1	4	4	2	4	3	4	3	2	4	1	5	4	2	2	5	1	4	4
2	1987	27	1	1	2	2	2	3	4	4	5	5	4	5	4	1	2	3	3	5	3	3	2	4	5	2	3	3	4	5		4	3	3	3	4	3	2	1	5	4	3	4	4	3	2	3	4	3
2	1969	45	2	1	1	1	1	3	2	2	5	5	2	5	4	3	1	2	3	5		2	3	3	5	1	5	2	5	5	3	4	3	4	3	3	2	4	4	2	3	5	4	5	1	5	3	5	3
1	1966	48	2	1	2	1	1	4	2	5	5	3	5	5	4	1	1	2	3	4	1	4	2	4	4	2	4	2	4	4	4	5	2	3	5	2	3	4	2	5	4	5	4	4	1	5	5	3	1
2	1954	60	3	1	1	1	2	4	2	4	4	5	5	5	5	2	3	3		5	4	4	1	4		1	3	5	4	4	1	4	2	4	4	5	1	2		4		4	4	3	2		4	4	4
2	1994	20	1	2	1	2	3	2	2	3	4	4	2	3	4	4	3	4	2	4	2	4	4	2	2	2	3	2		3	3	3	3	2	2	4	4	3	3	3	4	2	4	2	2	2	4	4	4
2	1994	20	1	2	2	3	1	4	2	2	3	3	4	4	4	4	4	2	3	5	3	5	3	4	4	2	4	1	4	2	1	4	4	3	2	5	2	4	2	1	3	4	4	5	4	4	3	4	3
2	1992	22	1	1	1	2	1	3	2	4	5	4	5	3	3	2	2	3	3	5	4	4	2	4	4	1	4	3	2		1	3	3	4	5	2	2	3	3	3	4	2	4	4	3	5	4	3	3
2	1995	19	1	2	1	4	1	4	2	3	5	4	3	4	3	4	2	2	2	4	2	2	3	3	2	5	3	2	4	4	3	3	1	2	3	2	5	4	2	3	4	4	4	4	2	4	3	3	2
2	1955	59	3	1	1	4		4	2	3	4	4	3	4	4	3	3	2	3	4	3	2	2	3	4	2	3	3	4	4	2	3	2	2	3	2	2	2	2	3	3	3	4	3	4	4	4	2	1
1	1949	65	3	2	1	2		3	2	4	2	4	3	4	4	4	3	3	4	5	3	3	3	4	4	4	2	2	3	5	3	3	1	4	3	4	4	4	3	1	3	4	4	3	1	5	3	2	3
2	1989	25	1	2	1	1	2	4	2	3	4	4	2	4	3	3	2	3	2	4	3	3	4	4	4	3	4	1	4	4	3	4	4	3	2	2	3	2	1	3	4	4	4	3	4	4	4	3	4
2	1989	25	1	1	1	1	1	4	2	3	4	4	2	4	3	3	2	3	2	4	3	3	4	4	4	3	4	1	4	4	3	4	4	3	2	2	3	2	1	3	4	4	4	3	4	4	4	3	4
1	1946	68	3	1	2	4		4	2	3	3	3	2	4	4	2	3	3	3	4	2	3	3	3	4	2	4	3	4	4	1	3	4	3	2	3	2	4	2	2	2	3	4	3	2	4	3	4	2
1	1995	19	1	2	1	2	1	2	2	4	4	3	2	5	4	4	3	2	4	5	2	2	1	3	4	4	5	2	4	3	1	3	2	3	3	2	5	5	1	2	3	5	4	4	2	4	2	4	3
2	1954	60	3	1	1	3		3	2	5	4	5	4	5	5	2	4	3	4	4	2	2	2	4	4	4	3	1	5	5	1	5	1	3	4	2	4	4	2	3	3	4	4	4	4	3	4	5	1
2	1973	41	2	1	1	3	1	3	2	4	4	5	5	5	5	2	3	2	4	4	2	4	2	4	4	3	3	2	4	4	2	3	2	2	2	3	4	4	3	3	4	4	4	5	2	4	4	4	3
2	1959	55	2	1	1	3		3	3	4	4	4	2	3	3	2	3	3	3	4	3	3	3	4	2	3	4	2	4	4	1	3	4	3	4	4	3	4	3	4	5	4	4	2	4	4	4	3	2
2	1990	24	1	1	2	2	1	3	4	4	4	3	2	4	4	5	2	4	3	5	3	4	4	2	4	4	4	2	2	2	1	3	5	4	2	3	3	4	2	4	3	2	4	2	4	4	4	4	2
2	1949	65	3	2	1	1		5	1	4	4	5	4	4	5	2	4	4	4	5	4	4	1	1	5	2	4	4	2	4	1	3	2	3	4	4	2	3	1	3	4	3	4	3	2	4	3	4	4
2	1996	18	1	2	1	4	1	2	2	5	5	3	2	3	2	2	2	5	3	5	1	1	4	2	4	4	5	3	4	3	1	5	5	5	5	3	2	5	1	4	3	3	4	3	1	5	1	4	3
2	1934	80	3	2	3	3		4	2	5	5	3	4	4	4	2	4	2	4	5	1	1	2	4	4	2	4	2	4	3	1	4	3	4	5	4	5	3	2	4	2	4	4	1	2	3	4	3	3
1	1939	75	3	2	2	3		3	3	4	4	4	5	4	3	2	4	2	4	5	2	2	2	3	2	2	3	2	4	4	2	4	2	3	4	5	3	4	4	4	4	4	4	2	2	5	5	4	5
1	1944	70	3	2	1	4		4	2	3	4	4	4	4	4	2	2	4	4	4	4	4	2	5	4	1	4	3	4	5	1	3	4	2	4	4	1	3	1	5	3	3	4	4	3	2	4	4	3
2	1997	17	1	2	1	4	1	3	3	4	4	3	4	4	4	4	3	2	3	5	2	1	2	4	3	5	4	2	5	4	1	4	4	4	3	3	5	4	2	3	3	4	4	4	3	3	3	4	3
2	1996	18	1	2	2	2	1	4	3	4	5	2	5	5	2	2	2	5	3	5	3	5	3	1	5	3	5	5	2	4	1	5	5	4	5	2	2	4	4	4	3	2	4	3	5	5	2	5	1
2	1995	19	1	1	2	4	1	4	2	4	5	4	4	4	4	2	4	2	3	3	3	4	2	4	4	1	4	3	4	4	1	3	3	3	3	2	4	2	2	4	3	4	4	5	2	3	4	5	3
1	1946	68	3	1	2	4		3	2	4	4	4	5	5	3	2	3	2	4	5	3	3	1	4	4	3	3	5	4	5	1	4	4	5	4	3	2	3	2	5	4	4	4	3	3	4	4	4	1
2	1979	35	2	2	1	2	2	4	1	4	4	4	3	5	3	1	1	2	3	5	3	4	4	4	5	1	2	4	1	5	1	5	1	2	4	2	1	4	1	4	5	4	4	3	2	4	4	4	3
2	1979	35	2	1	2	1	1	4	1	4	4	4	3	5	3	1	1	2	3	5	3	4	4	4	5	1	2	4	1	5	1	5	1	2	4	2	1	4	1	4	5	4	4	3	2	4	4	4	3
2	1964	50	2	1	1	3	1	4	2	4	2	4	4	5	5	4	3	4	3	3	3	5	1	4	4	2	4	2	3	5	1	3	4	3	3	2	3	2	4	1	3	4	4	4	4	3	3	4	3
2	1953	61	3	2	1	2		4	2	5	4	4	5	4	5	1	2	3	4	5	5	4	2	4	5	1	2	5	4	5	1	3	3	4	4	3	1	3	2	4	4	3	4	3	3	4	3	3	3
2	1987	27	1	1	1	2	1	2	4	3	3	2	3	4	4	4	2	4	3	4	1	4	2	2	4	2	5	4	4	3	5	4	5	5	5	3	2	4	4	4	3	2	4	3	4	5	5	3	2
2	1969	45	2	1	1	1	1	4	3	4	4	4	4	5	4	2	2	3	1	5	3	4	2	4	4	3	3	4	4	5	1	4	2	5	5	4	4	3	2	4	4	4	4	3	2	5	4	4	4
2	1987	27	1	2	1	1	1	2	2	3	4	4	3	5	4	4	2	2	4	5	2	3	1	5	4	3	3	5	5	4	1	5	2	4	4	3	4	3	3	4	4	3	4	4	2	4	3	4	3
2	1957	57	3	1	2	2		4	2	4	4	4	4	4	3	3	2	4	4	4	2	4	2	4	3	3	2	3	3	4	2	5	2	1	4	3	2	3	4	4	4	4	4	2	3	4	4	4	2
1	1948	66	3	1	1	1		4	3	4	4	4	5	5	5	3	2	4	4	3	2	4	1	4	4	2	4	4	5	5	1	5	2	4	4	4	2	3	2	4	5	5	4	2	2	4	4	4	4
2	1995	19	1	1	1	2	1	4	3	4	5	3	4	4	4	3	1	2	4	4	3	5	4	3	4	1	3	2	5	5	1	4	1	3	5	5	1	4	2	3	3	4	4	5	2	4	4	4	5
2	1950	64	3	1	1	3		4	2	5	5	5	5	4	5	1	3	2	5	5	3	4	3	4	5	1	3	3	4	5	1	4	2	3	4	5	2	3	3	4	4	3	4	3	1	5	4	5	4
1	1945	69	3	2	1	2		3	2	4	3	5	5	5	5	2	2	2	3	5	2	3	2	4	4	3	3	5	5	4	1	3	3	5	2	3	4	2	1	4	4	5	4	3	2	4	3	3	1
2	1978	36	2	1	1	2	2	4	2	4	4	4	5	5	5	2	3	2	4	5	2	4	3	3	4	2	4	3	4	4	2	5	2	3	4	4	4	4	2	4	4	4	4	4	2	4	4	4	4
2	1978	36	2	1	2	2	2	4	2	4	4	4	5	5	5	2	3	2	4	5	2	4	3	3	4	2	4	3	4	4	2	5	2	3	4	4	4	4	2	4	4	4	4	4	2	4	4	4	4
2	1986	28	1	2	2	1	2	2	3	4	4	3	4	4	2	4	2	4	3	5	2	4	3	4	5	2	4	3	3	4	1	4	3	4	3	3	2	4	5	3	4	4	4	4	4	4	4	4	2
2	1986	28	1	2	1	1	1	2	3	4	4	3	4	4	2	4	2	4	3	5	2	4	3	4	5	2	4	3	3	4	1	4	3	4	3	3	2	4	5	3	4	4	4	4	4	4	4	4	2
2	1984	30	1	1	1	1	1	4	2	4	4	4	2	5	4	3	2	2	4	5	5	2	3	4	4	4	4	3	4	4	1	3	4	4	3	3	4	4	3	4	4	4	4	5	4	5	4	4	4
1	1952	62	3	1	1	2		3	2	4	4	4	4	3	3	3	3	2	4	4	2	4	1	4	3	2	4	3	4	4	4	2	4	3	2	3	2	4	4	4	4	4	4	2	3	4	4	4	3
2	1997	17	1	2	2	4	1	3	1	4	5	4	4	5	4	4	4	4	4	4	2	3	2	2	3	4	5	3	5	3	1	3	5	4	4	3	4	4	2	3	4	4	4	4	4	5	5	4	3
2	1989	25	1	1	2	2	1	2	2	5	2	5	5	5	4	4	2	2	4	5	2	5	5	2	3	2	4	5	5	5	4	5	2	4	4	4	4	2	1	5	4	4	4	5	3	4	4	4	3
2	1968	46	2	1	1	2	1	2	4	4	4	5	5	5	5	3	2	3	4	5	4	5	2	3	5	1	5	3	5	3	2	3	5	3	4	2	1	4	4	5	3	4	4	4	3	5	5	5	2
2	1930	84	3	2	1	2		3	2	5	4	3	5	4	4	2	3	2	4	5	3	5	4	4	5	1	3	4	4	3	1	5	3	3	4	4	2	4	4	3	4	5	4	4	2	4	4	5	5
2	1996	18	1	1	2	4	1	4	3	4	4	5	5	4	4	3	4	2	3	5	3	4	2	1	4	2	3	4	2	4	1	4	3	2	4	4	2	4	3	5	4	4	4	5	3	4	4	4	3
2	1954	60	3	1	1	2		3	3	3	4	3	5	4	4	4	2	3	3	5	2	3	4	4	4	3	4	4	3	4	1	3	3	5	3	3	3	4	4	5	3	4	4	3	4	5	4	4	3
2	1989	25	1	1	1	2	1	4	2	5	4	4	5	5	5	3	3	2	4	5	4	4	1	5	5	2	2	5	4	5	1	4	1	5	5	3	2	2	1	5	5	4	4	4	3	4	5	4	5
2	1952	62	3	1	1	1		2	4	5	4	2	4	5	4	4	4	3	2	5	2	5	5	5	4	5	3	4	3	4	2	3	5	4	2	2	4	3	2	5	5	3	4	1	5	5	5	3	3
1	1979	35	2	1	2	1	1	3	2	5	5	4	4	5	4	1	1	3	4	5	4	5	1	5	5	2	5	2	5	4	1	4	4	3	4	3	2	5	5	5	5	5	4	5	4	4	3	4	4
1	1968	46	2	1	1	2	1	5	2	4	5	4	5	4	4	2	2	4	4	5	4	3	3	4	4	2	5	5	4	4	4	4	4	4	5	5	2	2	4	5	4	5	4	2	2	5	5	4	4
2	1944	70	3	1	1	4		4	1	5	5	5	5	5	5	1	2	2	5	2	5	5	1	5	5	1	2	5	4	5	1	4	2	5	5	3	2	4	2	5	5	4	4	4	2	5	4	5	3
2	1955	59	3	1	2	2		2	3	5	4	4	5	4	4	4	3	3	5	5	2	3	3	4	5	4	4	3	4	5	1	4	2	4	4	4	4	5	3	4	4	4	4	2	4	4	4	5	3
2	1988	26	1	2	1	1	1	4	4	5	4	4	5	4	4	3	2	4	3	5	3	5	4	4	5	2	5	3	3	4	2	4	4	5	3	4	4	4	4	4	3	4	4	3	4	5	4	4	3
2	1996	18	1	1	1	2	1	4	3	2	5	4	4	5	4	4	3	4		2	2	1	5	3	3	2	5	2	4		4	3	2	3	4	3	4	5	4	5	4	4	4	4	4	4	4	4	3
2	1993	21	1	2	1	2	1	4	2	5	4	3	1	4	4	5	5	2	1	5	1	1	5	1	1	5	4	1	4	2	1	4	1	4	4	1	5	5	1	1	2	1	4	2	5	2	2	4	3
2	1971	43	2	1	1	1	1	3	2	5	4	5	4	5	4	4	2	2	3	5	2	2	4	4	4	2	2	3	5	5	3	4	2	2	3	2	3	2	1	4	5	4	4	4	3	5	4	2	1
2	1968	46	2	2	2	1	1	4	2	3	5	4	4	5	5	2		3	4	5	3	4	2	4	4	1	4	3	2	3	1	5	4	4	4	5	1	3	3	3	5	4	4	4	2	4	4	4	4
2	1964	50	2	1	1	1	2	2	2	5	4	4	5	4	4	1	2	3	4	5	5	4	1	5	4	1	3	4	4	4	1	2	4	4	4	1	2	2	1	5	4	3	4	2	3	4	2	4	1
2	1995	19	1	2	1	4	1	4	1	5	5	4	5	5	3	2	3	3	4	4	4	2	1	4	5	1	5	3	4	4	1	3	3	3	4	4	1	4	3	5	3	5	4	5	3	3	4	3	3
2	1987	27	1	2	1	3	3	2	5	4	1	4	2	3	4	5	2	3	3	5	3	4	3	5	3	5	4	4	4	2	3	3	5	3	3		5	3	2	3	4	3	4	4	4	4	2	3	3
2	1984	30	1	1	1	3	3	3	2	4	2	4	5	4	3	2	2	2		5	2	5	3	1	4	2	3	3	3	4	1	5	2	2	2	4	2	2	1	2	4	4	4	4	3	4	4	4	3
1	1976	38	2	1	4	1	1	3	5	3	4	3	2	5	3		4	3	2	5	2	4	3	4	4	3	5	3	3	3	2	4	1	4	3	2	5	5	2	4	3	2	4	2	1	3	3	4	2
2	1969	45	2	1	2	1	1	1	2	5	4	3	4	4	3	2	3	3	2	4	3	2	2	4	4	2	3	3	4	4	2	4	3	4	3	2	2	2	2	4	4	4	4	3	4	4	4	4	1
2	1991	23	1	2	1	2	1	4	1	4	4	4	5	4	4	1	4	1	2	2	2	2	2	4	4	1	1	3	4	5	1	4	1	1	3	1	1	2	4	3	4	4	4	5	4	3	2	4	3
2	1996	18	1	2	1	2	2	3	3	3	4	3	4	4	3	4	3	3	3	3	2	3	3	3	4	4	4	2	3	2	2	4	3	2	3	2	4	4	2	2	3	4	4	4	2	4	2	4	3
2	1996	18	1	1	2	1	1	3	3	3	4	3	4	4	3	4	3	3	3	3	2	3	3	3	4	4	4	2	3	2	2	4	3	2	3	2	4	4	2	2	3	4	4	4	2	4	2	4	3
2	1969	45	2	1	1	2	2	1	2	5	4	3	4	4	3	2	3	3	2	4	3	2	2	4	4	2	3	3	4	4	2	4	3	4	3	2	2	2	2	4	4	4	4	3	4	4	4	4	1
2	1941	73	3	2	1	4		2	3	5	2	3	4	2	2	4	4	2	3	4	2	2	3	4	4	2	3	3	3	4	1	4	2	2	4	3	3	3	1	3	3	4	4	3	4	4	3	4	2
1	1946	68	3	1	1	2		4	3	4	3	4	3	4	4	4	3	2	2	5	3	2	2	3	4	2	3	2	4	3	2	3	3	2	2	1	3	4	2	3	3	4	4	4	2	4	4	4	1
2	1987	27	1	1	1	2	2	2	3	4	4	4	2	4	3	5	4	2	2	5	1	1	3	4	2	4	4	4	4	4	2	3	2	3	4	3	5	2	1	4	4	4	4	3	4	4	3	4	3
1	1966	48	2	2	1	1	1	4	2	3	3	4	4	5	3	3	1	2	2	5	1	4	3	5	4	3	2	3	2	5	3	5	2	2	4	2	5	3	1	4	4	4	4	4	2	3	2	3	2
1	1966	48	2	1	1			4	2	3	3	4	4	5	3	3	1	2	2	5	1	4	3	5	4	3	2	3	2	5	3	5	2	2	4	2	5	3	1	4	4	4	4	4	2	3	2	3	2
1	1942	72	3	2	1	1		1	4	3	4	4	4	4	3	4	2	3	2	3	2	2	2	4	4	2	2	4	2	4	5	2	2	2	4	2	2	2	4	2	2	4	4	4	3	3	2	2	2
2	1989	25	1	1	1	2	1	2	5	3	2	2	2	4	2	5	2	1	2	5	4	4	4	4	4	5	2	4	2	3	2	4	2	2	2	2	5	4	2	2	4	4	4	3	4	4	2	4	2
2	1962	52	2	1	2	2	1	4	3	4	4	4	2	4	5	2	4	1	3	5	1	1	4	2	4	2	2	3	4	4	1	5	1	3	4	3	4	4	3	3	4	4	4	3	3	3	3	4	3
1	1946	68	3	1	1	2		3	3	3	4	3	2	4	3	4	3	2	2	4	2	4	3	3	5	1	4	4	3	4	2	4	2	3	3	3	4	4	1	3	3	4	4	3	2	5	4	4	5
2	1990	24	1	1	1	1	1	2	5	4	3	2	2	4	2	5	2	4	2	5	2	5	4	2	4	5	3	2	4	1	4	5	4	4	3	3	4	4	2	2	3	2	4	3	4	5	4	4	3
2	1984	30	1	2	1	1	2	3	2	4	2	4	5	4	3	2	2	2	3	5	2	5	3	1	4	2	3	3	3	4	1	5	2	2	2	4	2	2	1	2	4	4	4	4	3	4	4	4	3
1	1976	38	2	2	1	4	1	3	5	3	4	3	2	5	3	3	4	3	2	5	2	4	3	4	4	3	5	3	3	3	2	4	1	4	3	2	5	5	2	4	3	2	4	2	1	3	3	4	2
2	1993	21	1	1	2	2	3	2	5	3	4	2	4	4	3	4	2	5	2	4	2	3	3	4	4	4	5	1	2	4	4	3	4	4	3	2	5	4	5	2	3	2	4	4	5	5	2	2	4
1	1950	64	3	1	1	3		2	3	3	5	4	2	4	4	3	4	3	2	5	2	4	2	4	3	4	4	2	4	4	1	4	4	4	5	3	4	4	3	5	4	2	4	3	4	5	1	3	3
2	1997	17	1	2	1	4	1	3	4	3	5	2	3	4	4	5	1	3	4	5	3	3	3	5	5	2	5	3	3	2	2	3	5	4	4	1	4	4	3	4	3	3	4	3	5	5	2	5	4
1	1953	61	3	1	2	4		4	1	5	2	4	4	4	4	2	4	2	4	5	2	2	2	4	3	2	4	4	4	5	1	3	2	4	3	3	4	2	4	3	4	4	4	3	3	4	4	2	3
2	1946	68	3	1	1	2		2	2	5	4	4	5	4	5	3	2	3	2	5	3	2	3	4	4	3	4	4	2	4	1	2	3	4	4	1	3	3	3	4	4	4	4	2	4	5	4	4	3
2	1987	27	1	2	2	1	2	2	5	4	1	4	2	3	4	5	2	3	3	5	3	4	3	5	3	5	4	4	4	2	3	3	5	3	3	3	5	3	2	3	4	3	4	4	4	4	2	3	3
2	1982	32	2	1	1	2	2	4	4	3	4	4	4	4	4	4	1	4	3	5	3	2	2	4	4	3	4	3	3	5	2	4	3	5	4	5	2	2	1	5	5	5	4	3	1	5	5	3	4
2	1982	32	2	1	2	1	1	4	4	3	4	4	4	4	4	4	1	4	3	5	3	2	2	4	4	3	4	3	3	5	2	4	3	5	4	5	2	2	1	5	5	5	4	3	1	5	5	3	4
2	1956	58	3	1	1	4		4	2	3	4	4	4	4	3	2	3	4	3	4	3	5	2	3	4	2	4	4	4	4	1	3	2	4	4	2	1	4	2	4	4	4	4	4	2	4	3	4	3
2	1991	23	1	2	1	3	1	2	3	5	5	4	2	4	4	4	2	4	4	5	3	4	5	1	4	2	3	2	3	4	2	2	5	2	2	3	2	4	4	4	4	5	4	4	2	4	5	4	3
1	1931	83	3	1	1	4		2	2	3	1	2	5	4	4	3	4	4	4	5	5	5	3	4	5	1	4	1	3	3	1	4	3	3	2	4	2	5	1	3	3	4	4	4	5	5	5	4	3
2	1970	44	2	1	1	2	2	2	4	4	4	3	4	4	3	4	3	3	3	4	2	2	3	3	4	2	3	4	2	4	3	2	4	4	4	2	2	2	2	4	4	3	4	2	5	4	4	3	2
2	1970	44	2	1	2	1	1	2	4	4	4	3	4	4	3	4	3	3	3	4	2	2	3	3	4	2	3	4	2	4	3	2	4	4	4	2	2	2	2	4	4	3	4	2	5	4	4	3	2
2	1955	59	3	2	1	1		3	4	2	3	4	4	4	4	4	2	4	2	4	2	4	3	2	2	4	4	3	4	3	2	4	4	4	2	2	5	3	3	2	3	4	4	3	3	4	4	4	2
2	1964	50	2	2	1	2	2	4	4	4	5	3	3	3	4	4	3	4	3	4	3	2	3	3	4	2	4	2	4	4	1	3	4	4	4	3	3	3	3	3	3	3	4	2	3	5	4	3	3
2	1964	50	2	1	2	1	1	4	4	4	5	3	3	3	4	4	3	4	3	4	3	2	3	3	4	2	4	2	4	4	1	3	4	4	4	3	3	3	3	3	3	3	4	2	3	5	4	3	3
2	1937	77	3	1	2	3		3	4	2	3	2	3	4	2	4	3	3	2	5	4	3	4	4	4	4	4	3	2	3	2	4	4	3	2	3	4	3	2	5	3	4	4	3	5	5	4	3	3
2	1992	22	1	2	2	1	3	3	3	4	4	4	5	4	4	3	3	4	3	5	3	2	2	4	4	2	4	5	2	4	1	3	4	3	4	3	2	4	3	3	4	3	4	3	4	4	3	5	3
2	1948	66	3	2	1	2		4	2	5	4	4	5	4	4	1	4	2	4	4	3	4	2	4	5	1	2	3	4	4	1	5	4	3	4	5	2	2	1	5	4	4	4	3	1	4	4	4	4
2	1959	55	2	1	1	2		4	2	4	4	4	4	4	5	2	3	3	4	4	3	3	3	5	5	1	2	5	2	4	1	4	4	4	5	2	3	1	2	5	4	3	4	4	3	4	4	5	1
2	1949	65	3	1	1	3		3	2	3	4	4	3	4	4	2	2	4	3	5	3	2	3	2	4	3	4	3	2	3	2	3	4	4	4	4	3	4	4	3	3	3	4	3	2	2	5	4	2
2	1958	56	3	2	2	2		2	2	4	4	4	4	4	4	3	2	3	4	4	4	4	2	4	4	2	3	3	4	4	1	3	3	3	4	4	2	3	3	3	4	4	4	3	3	4	4	4	3
2	1989	25	1	1	2	3	2	3	2	5	4	4	5	4	4	1	3	3	4	5	4	5	3	5	4	3	4	3	4	4	1	2	3	3	4	1	3	2	4	4	5	4	4	3	4	3	3	4	1
2	1951	63	3	1	2	4		3	2	4	4	4	5	3	2	4	4	2	3	5	3	4	5	5	3	1	4	2	3	5	1	4	4	4	4	5	2	3	1	5	5	1	4	1	4	5	4	4	5
2	1959	55	2	1	2	3		1	1	5	4	5	5	5	4	2	4	4	4	5	1	1	2	2	5	5	4	5	2	5	5	5	4	5	3	4	5	1	1	5	5	5	4	1	4	5	4	5	3
1	1954	60	3	1	1	4		3	3	3	5	5	4	4	4	3	3	2	4	5	3	4	3	3	3	2	3	3	3	4	1	3	3	3	4	4	1	3	5	3	3	4	4	3	3	3	5	4	3
2	1989	25	1	2	1	2		4	3	2	3	5	4	5	3	3	1	4	3	5	1	5	3	4	3	2	4	3	5	4	2	3	3	2	2	3	3	4	3	5	4	5	4	3	3	3	4	4	3
2	1962	52	2	1	1	2	1	4	2	5	4	4	5	5	5	2	2	3	4	5	3	2	3	5	4	2	4	3	4	5	1	4	3	2	3	4	2	4	3	2	4	4	4	3	2	4	5	4	3
1	1988	26	1	1	2	4	1	5	3	4	5	4	4	4	5	2	2	2	3	5	2	4	2	4	4	4	4	3	4	4	1	3	4	4	4	3	5	2	1	4	5	4	4	4	2	5	3	4	3
2	1958	56	3	1	2	3		3	1	5	5	4	4	5	5	1	3	2	4	5	2	2	2	4	5	5	4	5	5	5	2	5	2	3	5	3	4	3	3	4	5	3	4	3	3	5	3	3	3
1	1959	55	2	1	1	2		4	3	4	5	4	5	4	4	3	3	3	4	3	2	5	2	5	5	1	4	3	3	4	1	4	2	4	5	2	4	3	3	2	4	5	4	5	2	5	4	4	3
1	1956	58	3	1	1	4		4	2	5	4	4	5	5	5	2	1	2	4	5	2	3	1	5	5	1	4	3	5	4	1	3	4	3	4	3	1	3	3	3	5	4	4	4	2	5	4	4	3
2	1963	51	2	1	1	3	1	3	2	4	5	3	5	5	4	1	4	2	3	5	4	4	1	4	5	2	4	4	5	4	1	3	2	1	2	3	2	4	4	5	5	5	4	4	1	5	2	4	3
2	1952	62	3	1	2	3		3	1	4	5	5	4	4	4	2	3	3	4	4	3	5	2	4	4	1	5	3	4	5	2	3	4	4	3	3	2	4	4	4	4	4	4	3	3	5	3	4	3
2	1940	74	3	2	1	3		4	4	3	4	3	3	3	4	4	4	2	3	5	2	2	2	4	3	2	4	3	4	3	2	4	4	3	3	4	4	4	5	5	3	4	4	3	3	4	2	3	3
1	1957	57	3	1	1	1		2	3	5	4	3	5	4	5	3	2	2	4	5	2	3	2	4	4	2	3	5	4	4	3	4	2	3	4	5	3	4	1	4	4	3	4	1	2	5	5	4	3
2	1952	62	3	1	2	3	1	2	2	5	4	5	5	4	4	2	2	2	4	5	4	3	2	4	4	1	4	1	5	4	1	4	2	4	5	5	2	4	4	5	4	4	4	4	2	5	2	4	5
2	1968	46	2	2	2	2	2	4	2	4	2	4	3	5	5	4	2	2	4	5	4	4	5	3	4	2	4	2	5	4	3	5	4	4	1	3	2	5	4	2	4	4	4	2	5	5	4	5	5
2	1968	46	2	2	2	1	1	4	2	4	2	4	3	5	5	4	2	2	4	5	4	4	5	3	4	2	4	2	5	4	3	5	4	4	1	3	2	5	4	2	4	4	4	2	5	5	4	5	5
2	1971	43	2	1	1	1	1	3	4	5	4	2	4	5	4	2	2	3	4	5	4	4	2	3	4	2	4	5	5	5	2	4	4	3	5	2	2	3	3	4	5	5	4	3	4	5	4	4	1
1	1939	75	3	2	1	4		3	2	5	5	4	5	5	5	2	4	4	4	4	3	5	2	5	5	2	4	3	2	5	1	3	4	3	4	3	4	4	2	5	2	4	4	3	2	4	4	4	3
2	1988	26	1	1	1	2	2	2	2	4	3	2	4	4	4	5	1	3	4	5	3	4	4	4	4	2	4	3	5	3	1	4	3	4	2	3	3	3	5	4	4	5	4	5	3	4	4	4	1
2	1988	26	1	1	2	1	1	2	2	4	3	2	4	4	4	5	1	3	4	5	3	4	4	4	4	2	4	3	5	3	1	4	3	4	2	3	3	3	5	4	4	5	4	5	3	4	4	4	1
1	1980	34	2	2	2	1	1	4	2	4	4	4	4	5	4	2	2	2	4	5	3	5	4	5	5	2	2	5	4	4	1	3	2	3	5	4	3	3	4	3	5	4	4	5	1	4	4	4	5
1	1941	73	3	1	1	1		4	2	5	5	5	5	5	4	1	2	4	4	5	3	5	1	5	5	1	4	5	5	5	1	5	4	5	5	5	1	1	1	5	4	4	4	3	1	5	5	4	2
2	1996	18	1	1	1	4	1	4	1	4	5	5	4	5	5	4	1	1	2	4	4	5	4	3	5	4	5	1	5	5	1	4	5	4	5	4	1	4	4	5	3	5	4	5	4	5	5	3	4
2	1973	41	2	1	1	1	1	2	2	5	5	4	5	4	4	1	2	2	4	5	5	5	3	4	5	1	2	4	4	5	1	4	2	3	3	5	1	2	5	5	5	4	4	1	2	4	5	5	4
1	1955	59	3	1	1	1		5	1	3	5	4	5	5	4	4	3	3	5	5	3	5	1	3	5	1	5	5	5	3	1	5	4	3	4	5	3	5	3	3	4	5	4	4	1	5	5	4	4
2	1950	64	3	2	1	1		3	3	3	5	5	5	5	5	2	2	4	3	5	3	4	3	5	5	2	3	5	4	4	1	3	3	5	4	3	4	4	4	5	4	4	4	3	4	3	5	4	3
2	1993	21	1	1	2	4	1	4	3	3	4	4	3	4	4	2	3	2	4	5	4	4	4	5	4	2	5	2	3	5	1	4	3	4	4	3	2	5	3	3	3	3	4	4	3	5	2	3	3
1	1991	23	1	2	1	2	1	5	1	4	5	5	5	5	5	1	5	2	4	5	3	4	1	2	5	1	5	3	5	5	1	2	2	5	5	3	1	5	2	3	5	5	4	5	1	5	5	5	3
2	1989	25	1	2	3	1	1	3	2	5	4	4	5	4	4	1		3	4	5	4	5	3	5	4	3	4	3	4	4	1	2	3	3	4	1	3	2	4	4	5	4	4	3	4	3	3	4	1
2	1996	18	1	1	1	2	1	3	2	2	5	4		5	4	5	3	4	3	3	1	5	5	2	3	5		3	3	4	3	4		3	4	3	4	4	3	3	3	4	4	4	4	4	4	4	2
2	1989	25	1	2	1	2	1	3		3	4	4	4	4	4	4	4	3	2	4	2	2	3	2	3	5	4	3	4	4	1	3	4	4	4	3	4	3	2	4	3	3	4	3	2	3	3	4	3
2	1987	27	1	1	1	1	3	2	4	5	4	4	4	4	4	3	3	4	4	5	4	4	2	4	5	2	4	2	4		1	4	4	4	4	5	2	4	3	3	5	4	4	5	4	5	5	5	4
2	1985	29	1	1	2	3	3	4	3	3	4	5	4	4	4	3	4	3	3	4	2	2	4	4	3	2	4	5	4	4	1		2	4	3	1	4	5	3	4	3	2	4	3	1	4	4	5	1
2	1981	33	2	1	1	4	1	4	2	2	3	3	3	5	5	4	2	2	3	5	2	2	4	3	4	4	4	1	2	4	4	4	2	3	4	2	4	4	2	2	3	4	4	3	4	3	5	2	1
2	1980	34	2	2	2	1	1	3	2	4	5	4	5	4	3	3	2	5	4	5	3	4	2	5	5	3	3	5	3	4	1	3	3	4	5	3	5	3	2	5	5	4	4	3	2	5	4	5	2
2	1976	38	2	1	2	1	1	4	3	5	4	3	5	4	4	2	2	3	3	5	3	2	3	4	4	2	4	3	4	5	2	4	4	4	4	4	2	2	2	4	4	4	4	3	2	5	3	4	2
2	1969	45	2	1	4	1	1	4	2	5	5	3	5	4	4	1	2		2	5	3	4	3	4	5	3	4	5	2	3	1	1	3	4	4	1	3	3	4	5	5	3	4	1	2	4	1	3	1
1	1960	54	2	1	1	4		2	2	2	4	3	3	4	3	3	2	3	4	5	3	2	4	3	2	5	3	3	4	3	2	4	2	3	3	3	5	4	1	3	3	3	4	1	3	5	4	4	3
1	1950	64	3	1	1	2		4	2	5	4	3	4	4	4	3	2	2	4	4	4	3	2	4	2	4	3	2	3	4	2	4	2	2	4	4	4	2	2	4	3	3	4	2	2	4	4	3	3
2	1969	45	2	1	1	4	2	4	2	5	5	3	5	4	4	1	2	3	2	5	3	4	3	4	5	3	4	5	2	3	1	1	3	4	4	1	3	3	4	5	5	3	4	1	2	4	1	3	1
2	1945	69	3	1	1	1		2	3	3	4	4	3	4	4	4	4	2	4	5	2	4	4	4	4	3	3	4	4	4	2	4	2	3	4	1	4	2	2	3	3	2	4	2	4	4	4	4	1
2	1951	63	3	2	1	1		3	2	4	4	4	4	4	4	2	2	2	3	5	4	4	2	4	1	2	2	4	2	4	1	3	2	3	2	3	2	3	2	4	4	4	4	3	2	4	4	4	3
2	1985	29	1	1	1	2	2	4	3	3	4	5	4	4	4	3	4	3	3	4	2	2	4	4	3	2	4	5	4	4	1	3	2	4	3	1	4	5	3	4	3	2	4	3	1	4	4	5	1
2	1957	57	3	1	1	3		4	2	4	4	3	5	4	4	2	3	3	4	4	2	5	2	4	4	2	3	2	3	3	2	3	3	4	3	4	2	4	2	4	4	4	4	3	2	4	4	3	2
1	1945	69	3	2	1	1		4	2	4	4	2	4	4	4	4	4	2	4	3	2	4	3	4	4	2	3	2	3	4	2	4	2	3	4	2	4	4	2	4	4	4	4	3	2	4	4	4	3
1	1994	20	1	2	2	2	1	4	4	4	5	4	2	5	2	5	2	1	2	5	2	2	4	4	2	5	4	1	4	4	1	4	2	2	5	3	5	2	3	4	4	5	4	2	3	5	5	3	1
2	1953	61	3	2	1	3		2	2	4	5	4	5	5	5	1	2	2	4	5	2	5	3	5	5	3	1	3	4	5	1	4	1	2	4	5	4	4	2	5	5	4	4	1	1	2	1	5	3
1	1992	22	1	1	1	4	2	2	1	4	4	4	5	5	5	4	2	4	2	5	2	5	3	5	5	2	4	1	4	4	1	5	1	4	2	1	4	4	2	5	5	1	4	4	1	4	1	4	1
2	1977	37	2	1	1	2		2	4	4	4	3	4	4	4	4	2	2	2	4	2	1	3	4	3	4	3	2	4	4	3	4	2	2	3	4	4	3	2	4	4	4	4	3	4	5	4	4	1
2	1957	57	3	2	1	3		3	1	3	4	5	4	4	4	2	3	2	3	5	4	4	5	2	4	2	3	4	4	4	2	3	1	4	3	1	2	4	2	2	4	4	4	2	2	3	4	4	3
2	1947	67	3	2	1	4		4	3	5	3	4	2	4	4	4	4	3	4	3	2	5	3	4	2	2	4	3	4	4	1	4	3	3	4	4	2	3	2	4	2	4	4	4	4	4	3	4	2
2	1976	38	2	1	1	2	2	4	3	5	4	3	5	4	4	2	2	3	3	5	3	2	3	4	4	2	4	3	4	5	2	4	4	4	4	4	2	2	2	4	4	4	4	3	2	5	3	4	2
2	1954	60	3	1	1	2		5	2	3	4	4	3	4	4	3	3	4	4	5	3	4	2	4	4	2	2	2	3	4	1	3	4	4	4	3	3	3	4	3	3	4	4	3	2	5	3	4	3
2	1981	33	2	1	1	1	2	4	2	5	4	4	5	3	3	3	2	3	5	5	4	4	2	4	4	2	2	4	2	3	1	3	2	2	5	4	2	2	2	5	5	3	4	2	4	4	5	4	4
2	1981	33	2	1	1	1	1	4	2	5	4	4	5	3	3	3	2	3	5	5	4	4	2	4	4	2	2	4	2	3	1	3	2	2	5	4	2	2	2	5	5	3	4	2	4	4	5	4	4
2	1955	59	3	1	2	2		3	2	4	4	4	5	4	4	2	4	2	4	3	3	3	2	4	4	1	4	2	4	4	1	4	2	2	3	3	1	3	2	2	4	4	4	4	2	4	4	4	2
2	1996	18	1	1	2	3	1	3	4	3	4	5	3	4	4	5	3	3	3	3	1	2	4	2	4	5	5	2	3	4	3	4	4	3	3	3	5	4	2	2	3	3	4	4	3	3	4	5	3
2	1949	65	3	1	1	1		4	2	4	4	4	3	4	5	2	2	4	3	5	2	2	4	4	5	4	4	5	3	5	1	5	2	4	4	4	4	2	4	4	4	4	4	1	3	4	4	4	3
2	1953	61	3	2	1	3		4	1	4	5	4	3	4	5	2	4	2	5	4	2	3	3	5	4	3	4	2	3	4	1	4	2	2	3	4	3	4	3	3	3	4	4	4	2	4	4	4	3
2	1945	69	3	1	2	1		4	2	4	4	4	5	5	5	3	1	2	4	3	1	4	1	1	5	1	4	5	5	5	1	4	2	5	5	4	1	4	1	5	3	3	4	1	1	5	4	4	5
1	1941	73	3	1	1	2	1	4	2	5	4	4	5	4	5	2	3	2	4	5	2	3	2	4	4	1	5	2	3	4	1	4	5	4	4	2	1	4	1	4	4	4	4	4	2	5	4	4	2
2	1961	53	2	1	1	2	1	3	2	5	4	5	5	5	5	2	3	1	4	4	2	5	3	5	5	2	3	2	3	4	1	2	2	4	3	3	3	3	4	3	5	2	4	5	3	5	1	3	2
2	1974	40	2	1	1	2	1	3	4	5	4	4	2	4	4	4	2	4	2	5	2	2	4	4	4	2	4	2	4	4	1	4	4	4	4	2	3	4	3	4	4	4	4	2	4	4	1	5	2
2	1956	58	3	1	1	1		4	4	2	5	4	5	5	5	1	4	3	3	5	3	2	1	5	4	1	4	5	5	5	1	4	2	5	5	3	1	4	1	5	5	3	4	1	1	5	5	5	1
2	1993	21	1	1	2	2	1	2	2	5	4	5	5	5	5	3	3	1	4	3	3	2	2	4	4	1	5	4	5	5	1	5	1	3	3	4	2	4	5	2	4	5	4	5	2	4	4	4	3
2	1978	36	2	1	1	3	1	3	3	5	4	4	5	4	3	2	2	3	4	5	2	3	3	4	4	3	4	4	4	4	2	3	3	4	4	3	4	4	3	5	4	5	4	4	2	4	4	4	3
2	1953	61	3	1	2	2		4	1	5	5	4	5	4	4	2	4	2	4	5	2	2	3	4	4	2	2	5	5	5	1	4	2	4	5	3	3	3	4	5	4	4	4	3	2	4	4	3	4
1	1953	61	3	2	2	1		4	3	3	4	4	4	5	4	3	2	4	4	5	3	4	3	4	4	2	4	5	5	4	1	3	4	4	4	3	3	3	2	4	4	5	4	4	4	4	4	4	3
2	1980	34	2	2	1	1	2	4	4	3	4	3	5	4	5	4	3	4	3	5	3	4	3	3	4	3	4	3	3	4	3	4	4	3	3	4	4	4	1	2	3	4	4	4	4	4	3	4	2
2	1980	34	2	1	1	3	3	4	4	3	4	3	5	4	5	4	3	4	3	5	3	4	3	3	4	3	4	3	3	4	3	4	4	3	3	4	4	4	1	2	3	4	4	4	4	4	3	4	2
2	1935	79	3	1	1	2		4	3	4	4	3	4	4	3	2	4	3	4	5	2	3	1	2	4	2	4	4	4	4	1	4	3	4	5	2	4	3	3	5	2	3	4	2	2	5	4	5	2
2	1951	63	3	2	2	2		4	2	3	4	4	5	5	5	2	2	2	4	5	4	4	1	5	5	1	2	5	5	5	1	5	2	4	4	4	1	4	5	5	5	2	4	3	2	4	4	3	3
1	1952	62	3	1	1	2		3	2	3	4	4	4	4	4	3	3	4	4	4	4	3	2	3	4	2	3	4	4	5	1	2	4	4	4	2	4	4	4	5	4	4	4	3	3	4	4	4	3
1	1951	63	3	1	2	2		3	2	5	4	3	5	5	4	2	3	2	5	5	3	4	2	5	4	1	4	5	4	5	1	5	2	5	5	4	1	3	1	5	5	5	4	2	3	5	3	4	2
1	1943	71	3	2	2	1		4	4	1	5	5	5	5	5	3	4	1	3	5	3	5	4	5	4	1	2	5	5	5	1	5	1	2	4	2	1	5	1	4	5	5	4	5	3	5	2	3	3
2	1955	59	3	1	1	2		2	2	2	5	4	3	5	5	3	4	4	4	5	3	2	3	2	4	2	5	3	4	5	1	3	4	5	5	3	3	4	4	5	2	3	4	3	4	5	5	3	3
2	1945	69	3	1	2	3		4	2	1	4	4	4	5	4	2	2	4	4	4	5	4	4	2	4	1	5	4	4	4	1	2	2	4	4	3	1	3	5	3	4	4	4	3	3	5	5	3	4
2	1941	73	3	1	2	2		4	1	5	5	5	5	5	5	1	2	4	3	5	2	4	2	4	5	1	4	5	4	5	1	4	2	5	5	3	2	2	4	3	4	4	4	3	2	5	4	5	3
2	1969	45	2	1	1	1	2	4	2	4	5	4	3	5	5	2	2	4	4	5	3	2	4	3	4	1	5	2	5	5	1	4	2	4	4	3	2	4	2	5	5	4	4	4	3	4	4	4	3
2	1969	45	2	1	1	1	1	4	2	4	5	4	3	5	5	2	2	4	4	5	3	2	4	3	4	1	5	2	5	5	1	4	2	4	4	3	2	4	2	5	5	4	4	4	3	4	4	4	3
1	1961	53	2	1	1	1	2	3	4	4	4	4	4	5	4	2	2	2	3	5	2	4	2	3	4	4	4	4	4	4	2	4	4	4	4	4	4	4	1	4	4	4	4	4	2	5	4	4	4
2	1938	76	3	2	1	4		1	2	5	3	3	5	4	3	3	3	3	4	5	3	4	3	5	5	2	4	5	3	4	1	3	5	4	4	3	3	4	5	4	4	4	4	3	3	5	4	4	3
2	1952	62	3	2	1	2		2	2	4	4	4	4	5	4	3	2	4	2	5	2	4	1	5	5	2	3	5	2	4	1	4	3	4	4	3	4	4	4	3	4	4	4	2	2	5	5	5	2
2	1992	22	1	2	2	2	1	4	2	5	5	4	5	5	4	2	2	4	4	5	2	4	1	4	5	2	4	4	4	5	1	4	4	5	5	2	2	4	3	5	4	4	4	3	2	5	5	5	3
2	1996	18	1	2	1	2	2	5	2	5	5	4	4	5	4	1	2	4	3	5	5	5	2	2	4	1	3	4	5	5	1	5	1	4	5	2	2	2	5	5	4	5	4	5	1	4	5	5	5
2	1947	67	3	1	1	4		2	2	4	4	5	5	5	5	4	2	3	3	5	2	2	2	3	5	3	5	3	5	5	3	5	3	4	5	3	4	4	4	5	4	4	4	2	2	4	4	4	3
1	1995	19	1	2	1	4	1	4	2	3	4	2	3	4	4	2	2	3	3	3	2	4	2	4	3	2	4	4	4	4	2	4	3	4	2	4	2	5	1	4	4	4	4	2	2	4	4	4	1
2	1960	54	2	2	2	2	1	2	4	4	4	2	4	1	4	3	4	4	4	5	2	4	3	4	4	4	5	3	4	5	1	3	4	5	5	4	4	4	4	5	4	5	4	3	2	1	5	4	3
2	1996	18	1	2	2	4	1	3	2	2	4	2	4	4	4	4	2	4	2	3	2	2	4	3	4	2	5	2	4	3	1	2	4	4	4	3	4	3	2	3	4	3	4	3	4	2	3		2
2	1994	20	1	1	2	2	1	2	3	2	2	2	4	4	5	5	2	4	3	3	4	5	5	3	4	2	4	1	3	2	1		4	3	1	1	2	3	2	2	4	4	4	4	5	2	3	4	1
1	1994	20	1	2	1	2	1	4	1	4	5	5	4	5	3	2	2	2	5	5	3	4	1	4	4	2	5	4	3	4	1	5	5	4	4	4	1	3	4	4	3	4	4	4	3	5	5	3	2
1	1989	25	1	2	2	3	1	2	3	4	4	4	3	5	4	3	2	3		5	3	4	3	4	4	3	4	4	4	4	2	4	2	3	4	4	4	4	4	5	5	4	4	2	2	3	4	3	4
2	1985	29	1	1	1	3	1	3	4	3	2	2	3	3	2	5	2	2	3	5	4	5	4	4	2	4	3	2	2	2	4	5	3	2	2	2	5	5	2	3	3	2	4	2	3	4	3	4	4
2	1978	36	2	2	1	2	3	3	2	5	4	4	5	3	4	1	2	2		3	2	4	2	5	5	3	2	2	4	3	1	5	3	4	5	5	4	3	5	5	5	4	4	3	4	5	4	4	4
2	1974	40	2	1	2	1	3	2	3	3	2	4	4		4	4	2	4	3	5	2	3	3	2	3	4	4	4	3	3	2	2	5	4	4	2	4	4	1	5	4	4	4	4	3	3	5	4	3
2	1966	48	2	1	1	4	1	3	2	5	4	5	5		5	2	2	3	5	5	2	5	2	4	5	3	4	2	5	5	2	4	4	4	4	5	2	4	2	5	4	5	4	4	1	5	5	4	3
2	1957	57	3	1	2	2	2	3	2	5	5	4	4	4	4	3	3	3	3	5	3	4	2	3	4	3	2	4	5	5	1	3	2	3	5	3	4	4	2	5	5	3	4	3	2	5	4	4	3
1	1945	69	3	1	1	1	2	3	3	4	4	4	4	4	4	3	3	3		5	4	4	2	4	4	2	4	4	2	4	1	4	5	4	4	2	2	3	2	3	4	3	4	4	3	4	2	3	4
2	1991	23	1	2	1	2	2	3	4	3	4	2	4	3	3	3	3	4	2	4	1	2	3	3	4	2	3	2	2	3	2	2	4	4	3	1	3	2	1	4	2	3	4	2	4	5	3	3	1
2	1991	23	1	1	2	1	1	3	4	3	4	2	4	3	3	3	3	4	2	4	1	2	3	3	4	2	3	2	2	3	2	2	4	4	3	1	3	2	1	4	2	3	4	2	4	5	3	3	1
1	1948	66	3	1	1	2		2	1	5	5	3	2	5	2	2	1	4	3	1	1	1	3	4	5	1	4	5	3	4	3	5	4	4	5	2	2	4	2	4	3	2	4	1	2	5	3	5	3
1	1991	23	1	2	1	2	1	3	2	5	4	4	2	5	2	2	1	4	3	5	1	2	2	4	3	4	4	3	4	4	1	4	3	4	3	1	4	2	1	5	5	1	4	3	2	5	4	3	2
1	1991	23	1	1	2	1	1	3	2	5	4	4	2	5	2	2	1	4	3	5	1	2	2	4	3	4	4	3	4	4	1	4	3	4	3	1	4	2	1	5	5	1	4	3	2	5	4	3	2
1	1996	18	1	1	2	4	1	4	3	3	4	4	4	5	2	4	2	3	4	5	1	2	1	2	3	2	4	1	4	3	1	4	4	2	3	4	4	4	4	3	2	3	4	4	2	3	1	2	3
2	1948	66	3	1	1	4		3	2	3	4	4	4	5	5	3	3	3	4	3	2	3	2	3	3	2	3	3	4	4	1	3	3	3	3	3	2	2	3	4	3	4	4	2	2	4	4	3	3
1	1947	67	3	1	2	1		2	2	5	4	4	2	4	4	2	3	3	4	5	4	3	2	4	4	2	3	5	3	4	1	3	4	4	5	2	2	2	3	4	5	4	4	2	3	5	2	3	1
2	1959	55	2	1	2	4		2	4	3	4	3	4	4	4	4	3	3	4	4	2	4	3	4	4	2	4	5	2	4	1	1	2	3	4	1	3	4	2	3	4	4	4	4	4	3	4	2	2
2	1963	51	2	2	1	1	2	3	3	4	4	4	4	4	4	3	4	3	2	5	2	3	2	3	4	3	2	3	3	5	1	4	2	4	4	2	3	3	3	4	4	4	4	4	2	4	4	4	2
2	1963	51	2	1	1	1	1	3	3	4	4	4	4	4	4	3	4	3	2	5	2	3	2	3	4	3	2	3	3	5	1	4	2	4	4	2	3	3	3	4	4	4	4	4	2	4	4	4	2
1	1947	67	3	2	1	2		4	2	5	4	5	4	4	4	1	1	3	3	4	2	3	1	5	4	2	3	4	5	5	1	4	3	3	4	3	3	2	1	3	3	3	4	3	2	4	3	3	3
2	1956	58	3	2	1	4		2	2	4	4	4	5	4	4	2	4	2	3	5	2	4	1	5	5	1	4	4	4	4	1	4	4	2	4	4	2	2	2	4	5	4	4	4	4	5	2	5	3
2	1985	29	1	1	1	1	2	3	2	5	3	5	5	4	5	2	2	3	4	4	3	4	2	4	5	1	4	2	4	4	1	2	3	4	4	1	1	3	2	3	4	4	4	5	3	3	3	4	1
2	1996	18	1	1	1	2	1	2	2	4	5	4	4	4	2	4	3	2	3	5	4	2	3	2	4	4	4	4	4	4	2	4	4	4	4	3	4	3	2	4	4	3	4	2	4	4	4	4	3
2	1959	55	2	1	2	2		4	2	4	4	3	3	5	5	3	2	3	2	4	3	4	3	4	4	2	4	4	4	5	2	4	3	3	4	2	3	3	1	2	4	5	4	2	4	4	2	3	4
2	1956	58	3	1	1	4		3	2	3	4	3	5	4	4	2	2	2	3	5	4	4	2	4	5	1	5	3	4	4	1	3	4	5	3	2	2	2	1	5	4	3	4	3	3	4	4	4	1
2	1984	30	1	2	1	1	2	4	4	5	4	4	4	3	4	2	2	2	2	5	4	5	2	2	3	2	3	4	4	5	1	4	2	3	4	3	3	3	1	4	3	4	4	4	2	3	4	3	2
2	1985	29	1	1	1	1	3	2	5	3	4	2	2	4	3	4	4	4	3	5	2	4	4	4	4	4	4	2	2	2	4	4	3	3	2	2	5	4	4	4	3	4	4	2	3	4	4	4	2
2	1977	37	2	1	1	2	2	3	3	2	4	4	3	4	3	4	2	5	2	5	1	3	4	5	4	4	2	4	1	5	3	3	3	5	5	1	3	3	3	4	3	5	4	5	3	5	3	4	3
2				2	1	2	1	3	2	2	4	5	3	4	4	2	4	1	3	4	2	2	2	4	4	1	4	3	4	4	1	4	3	4	4	2	2	4	4	3	3	3	4	2	4	4	3	4	2
2	1993	21	1	2	1	4	1	2	5	4	4	4	4	4	2	4	2	5	2	5	3	2	2	4	2	5	4	1	4	4	2	2	2	4	2	1	3	3	2	5	5	4	4	5	5	5	5	3	2
2	1980	34	2	1	1	2		2	3	5	4	4	4	4	4	3	1	4	3	5	3	2	2	5	4	2	2	3	2	5	1	4	5	5	4	2	2	2	1	5	5	4	4	4	3	5	3	2	2
2	1953	61	3	2	1	4		3	2	3	4	5	4	4	4	3	4	2	4	4	2	3	3	3	4	3	3	5	4	5	3	3	2	4	3	3	2	3	2	3	4	4	4	3	2	4	3	4	3
2	1952	62	3	1	2	3		3	2	2	4	4	3	4	4	3	2	4	2	5	2	4	4	2	3	2	3	4	3	4	1	4	2	3	4	3	3	3	3	4	3	4	4	3	3	4	4	4	3
2	1948	66	3	1	2	2		2	2	5	4	3	4	3	4	3	3	2	4	4	3	4	4	3	4	2	3	4	3	3	2	4	4	3	4	3	3	4	3	5	3	3	4	2	3	4	3	3	3
2	1989	25	1	1	1	2	1	2	2	4	4	4	5	4	4	4	2	4	3	5	2	2	3	4	4	3	4	3	3	2	2	4	4	4	3	3	4	4	2	4	4	4	4	5	3	5	4	4	1
2	1938	76	3	2	2	4		4	2	5	4	4	5	3	4	1	1	2	4	5	3	4	2	4	4	2	4	5	1	5	1	2	3	4	5	2	2	3	5	5	5	2	4	1	4	4	1	4	2
1	1952	62	3	1	1	3		3	2	2	4	4	4	5	4	4	2	4	4	5	4	4	3	3	4	2	4	5	2	4	1	4	2	4	3	4	2	4	4	4	4	4	4	3	4	4	2	4	3
1	1928	86	3	1	1	2		4	2	4	5	4	5	4	4	3	3	2	4	4	2	4	4	4	4	2	4	3	4	3	1	3	3	4	5	4	3	4	4	3	3	4	4	4	2	5	3	4	3
2	1943	71	3	2	1	3		4	2	4	4	4	3	4	4	4	2	2	3	5	4	2	2	5	4	3	2	3	4	5	1	5	2	2	3	3	3	2	2	5	5	5	4	4	2	5	4	4	2
1	1950	64	3	1	2	2		3	2	2	4	3	4	5	4	4	4	2	4	5	2	2	4	3	4	1	5	4	4	4	4	4	4	3	4	4	2	4	3	4	4	4	4	2	4	3	4	4	3
2	1978	36	2	1	1	2	1	4	2	3	4	4	3	4	4	2	2	4	3	5	2	4	5	3	4	2	4	3	4	4	1	5	4	4	4	4	2	2	3	5	3	4	4	2	2	5	5	4	3
2	1967	47	2	2	1	1	1	2	4	4	4	2	4	3	2	3	2	4	5	5	3	4	5	2	5	3	5	4	2	1	1	5	4	4	5	5	2	3	4	5	5	2	4	1	5	5	5	3	5
1	1938	76	3	1	2	2		4	2	4	5	4	5	4	5	3	2	2	4	5	3	4	2	4	5	1	4	3	4	4	1	4	4	3	3	3	2	4	2	4	5	3	4	4	2	4	4	3	4
2	1985	29	1	1	2	2	1	2	4	2	4	5	4	5	4	3	1	4	3	5	2	1	3	4	5	4	4	3	4	5	1	1	4	4	4	3	3	1	3	5	3	4	4	5	2	4	5	4	3
2	1956	58	3	1	1	4		4	2	3	5	5	4	5	5	4	4	4	3	5	4	4	3	3	3	2	4	2	4	3	1	2	4	3	4	3	3	2	4	2	2	5	4	4	3	4	4	3	3
2	1947	67	3	2	1	3		4	3	4	5	5	4	5	4	2	4	1	4	5	2	3	3	4	4	4	4	2	4	5	2	3	2	4	4	4	4	4	3	4	4	5	4	2	2	5	5	4	4
1	1974	40	2	2	1	1	1	4	2	4	4	3	4	4	4	4	2	4	3	5	2	5	3	3	4	4	5	2	3	5	3	4	3	4	5	3	4	4	2	4	5	4	4	3	3	4	4	4	4
1	1974	40	2	1	1	1	1	4	2	4	4	3	4	4	4	4	2	4	3	5	2	5	3	3	4	4	5	2	3	5	3	4	3	4	5	3	4	4	2	4	5	4	4	3	3	4	4	4	4
2	1992	22	1	2	1	2	1	4	4	3	4	3	4	5	4	4	3	3	3	5	2	3	3	3	4	2	3	5	5	4	1	3	3	4	4	3	3	5	5	4	3	4	4	4	4	5	5	4	3
2	1936	78	3	1	1	2		4	1	5	5	5	5	5	5	1	4	3	4	5	3	3	1	4	5	1	5	4	1	5	1	4	4	5	5	3	1	4	2	5	4	4	4	3	1	5	5	4	4
2	1941	73	3	1	1	2		3	2	5	3	4	5	5	4	3	1	3	5	5	2	3	2	4	4	3	4	3	4	4	1	4	5	5	3	5	3	4	2	5	5	5	4	2	1	5	4	4	3
2	1996	18	1	2	2	3	2	3	4	2	5	3	3	4	3	4	4	3	3	5	3	3	5	3	5	4	4	2	3	3	1	3	4	2	2	2	4	5	5	4	4	4	4	3	3	4	4	4	4
2	1950	64	3	1	1	1		3	1	4	5	4	3	5	4	3	2	4	4	5	2	2	2	5	5	2	5	5	4	4	1	4	4	4	5	4	4	4	2	5	4	4	4	3	2	4	5	4	3
2	1964	50	2	2	1	3		3	1	3	5	5	5	5	5	3	3	3	4	2	2	4	3	4	4	1	3	3	5	5	1	5	3	3	4	4	2	3	3	5	5	5	4	5	2	5	4	5	4
2	1947	67	3	2	2	4		3	2	3	4	4	4	4	4	2	1	4	5	5	3	5	1	4	3	3	5	3	4	5	1	5	3	3	3	5	3	5	5	5	3	4	4	2	3	5	5	5	3
2	1970	44	2	1	2	1		2	4	5	4	4	4	4	4	4	4	3	3	5	4	4	3	3	4	4	4	4	4	5	1	2	4	4	4	3	3	3	3	4	5	5	4	4	4	4	4	4	3
2	1995	19	1	2	1	2	1	4	4	3	5	4	5	4	3	4	4	3	4	5	2	4	4	4	3	4	5	3	3	4	1	4	5	5	4	4	4	4	3	5	4	5	4	4	3	4	4	4	4
2	1962	52	2	1	1	2	1	2	3	5	5	3	5	5	5	4	2	4	4	5	3	3	2	4	4	4	5	3	4	4	4	2	5	5	5	4	5	4	5	4	5	4	4	2	4	5	5	4	1
2	1989	25	1	1	1	1	2	4	2	4	5	4	5	4	4	2	3	4	4	4	1	4	3	4	4	3	4	2	4	4	1	4	4	5	5	3	4	4	4	4	2	4	4	5	3	4	4	5	3
2	1988	26	1	1	2	2	1	4	2	3	4	4	5	4	5	4	2	3	4	5	3	4	3	4	4	4	4	3	4	4	1	4	3	3	4	4	4	3	4	5	4	5	4	5	2	5	4	4	5
	1996	18	1	2	2	2	1		2	2	4	4	5	4	4	2	3	3	4	4	3	5	2	4	4	2	4	2	4	4	1	4	3	3	4	3	2	4	5	4	4	4	4	5	4	4	4	4	4
2	1985	29	1	1	1	1	1	3	2	5	3	5	5	4	5	2	2	3	4	4	3	4	2	4	5	1	4	2	4	4	1	2	3	4	4	1	1	3	2	3	4	4	4	5	3	3	3	4	1
2	1997	17	1	2	2	4	1	2	5	3		4	2	5	4	5	5	3	1	5	2	1	3	2	2	5	5	2	5	3	1	4	5	3	3	4	5	2	4	4	4	4	4	3	5	5	4	4	3
2	1996	18	1	1	2	2	1	4	2		2	4	4	5	5	3	2	3	3	5	2	2	3	4	4	4	3	2	3	5	1	4	2	4	5	3	4	5	2	4	5	4	4	5	2	5	5	3	4
2	1993	21	1	2	1	4	1	4	2	4	4	4	5	5	4	2	2	4	4	4	2	4	2	4	4	2	4	4	4	5	1	4	4	4	4	3	2	4	4	4	5	5	4	4	1	4	5	4	3
2	1988	26	1	1	1	1	1	2	4	4	4	4	4	4	3		3	3	4	5	4	4	2	4	4	2	5	4	3	4	1	4	4	4	4	2	3	2	3	4	4	4	4	4	4	4	4	4	3
2	1983	31	2	1	1	1	2	4	2	3	5	3	5	3	4	3	4	3	4	4	2	5	1	5	3	2	3	3	4	4	1	3	1	2	4	4	4	4	3	4		5	4	4	2	4	4	4	3
1	1956	58	3	1	1	1	1	3	2	3	4		2	4	4	3	2	4	4	5	2	2	3	3	4	3	3	4	4	4	2	4	4	4	4	2	3	3	2	4	3	4	4	2	2	4	3	4	2
1	1967	47	2	2	1	2	1	3	3	4	4	2	2	4	4	3	2	5	2	5	1	2	3	4	3	3	4	3	2	5	2	3	3	4	4	3	4	3	1	3	5	3	4	1	3	5	4	3	1
1	1967	47	2	1	2	1	1	3	3	4	4	2	2	4	4	3	2	5	2	5	1	2	3	4	3	3	4	3	2	5	2	3	3	4	4	3	4	3	1	3	5	3	4	1	3	5	4	3	1
2	1953	61	3	1	1	2		2	3	4	5	3	4	4	4	2	4	2	3	5	1	1	2	2	2	5	3	4	5	4	1	5	2	3	2	4	5	2	2	4	3	4	4	2	2	4	2	3	2
1	1957	57	3	1	1	2		4	1	4	5	3	4	4	4	3	4	2	3	4	3	3	2	4	3	2	4	2	3	5	1	4	2	3	3	2	2	2	2	4	4	5	4	4	1	4	4	2	2
2	1985	29	1	2	1	2		3	2	3	4	3	3	4	3	4	2	3	2	4	3	2	2	3	4	3	4	2	4	4	2	3	2	4	3	2	3	4	2	4	4	3	4	3	2	3	2	4	1
2	1997	17	1	2	1	4	1	3	2	4	5	2	3	4	2	4	1	4	2	5	2	4	2	4	3	4	4	3	3	2	1	3	4	2	4	1	4	5	4	5	3	3	4	4	3	4	5	4	1
1	1932	82	3	1	1	2		2	5	2	4	3	5	3	4	4	4	2	5	4	2	3	4	4	2	4	4	3	4	4	1	3	2	2	4	1	4	5	2	3	3	4	4	2	2	4	2	2	2
2	1996	18	1	2	1	2	1	2	2	3	4	4	4	4	2	3	3	4	4	4	2	4	4	4	4	2	4	2	3	4	1	3	4	3	2	2	2	3	3	2	3	3	4	4	4	3	3	4	2
2	1945	69	3	2	1	3		3	4	4	4	3	4	4	2	4	3	5	4	4	3	3	3	2	4	2	4	3	3	3	1	3	4	3	4	4	3	3	3	4	3	3	4	3	3	4	4	4	3
2	1961	53	2	2	2	3	2	3	4	4	4	4	2	4	4	4	4	2	2	5	1	5	5	2	2	4	3	2	1	4	1	1	2	5	4	1	4	4	3	5	4	4	4	1	2	4	1	4	5
2	1995	19	1	2	1	2	1	4	1	4	5	5	4	4	4	2	2	4	1	5	2	3	3	5	4	2	2	4	4	4	1	3	2	2	4	2	3	2	2	4	5	5	4	5	2	4	4	2	4
2	1950	64	3	1	1	1		4	2	4	4	3	4	4	3	4	2	2	4	5	2	2	3	4	4	2	3	2	3	4	2	4	2	3	4	3	4	1	2	3	4	4	4	2	2	4	4	3	2
2	1949	65	3	2	1	2		3	2	5	4	4	5	5	5	3	3	3	3	3	3	4	3	4	5	1	2	3	3	4	1	3	3	3	4	3	2	2	3	3	3	4	4	3	2	4	3	4	3
1	1940	74	3	1	2	2		4	2	5	4	4	5	4	5	1	3	2	5	5	2	4	1	5	5	1	3	4	1	5	1	5	2	3	3	2	2	3	1	3	4	4	4	3	2	5	5	4	1
2	1975	39	2	1	1	1	1	4	2	4	5	3	4	5	3	3	3	3	3	5	2	2	2	4	4	3	3	4	3	4	2	4	4	4	4	4	4	2	2	5	5	3	4	2	3	5	4	3	2
2	1946	68	3	2	2	2		4	1	4	4	3	5	3	2	1	2	2	3	5	3	5	2	5	4	1	5	3	4	3	1	4	2	4	5	2	1	4	5	4	4	3	4	3	2	4	4	4	3
1	1991	23	1	2	1	2	1	2	3	3	4	4	4	4	3	2	3	2	4	5	1	2	2	2	3	2	3	1	3	4	1	5	2	3	3	4	4	4	3	4	4	3	4	5	3	5	4	5	4
2	1944	70	3	2	1	3		4	2	4	4	4	5	3	4	2	3	4	3	5	3	4	2	5	4	2	5	3	3	4	1	2	5	3	5	1	2	2	2	4	3	4	4	3	2	3	4	4	1
1	1991	23	1	2	1	1	2	4	1	4	4	4	2	5	4	5	2	4	1	4	2	4	4	4	4	5	5	2	3	4	1	4	5	5	4	4	4	2	1	2	4	2	4	2	2	4	4	3	2
2	1950	64	3	1	1	4		3	2	4	3	3	4	3	3	2	2	4	3	5	4	4	4	4	4	2	4	4	4	4	2	3	4	4	4	3	2	4	3	3	4	3	4	4	2	4	4	4	2
2	1963	51	2	1	1	2	2	2	4	4	4	2	5	4	4	5	3	4	3	4	5	4	4	3	4	1	4	4	3	5	1	3	5	4	4	1	2	4	2	3	3	3	4	3	4	4	2	2	3
2	1949	65	3	2	1	2		4	1	4	4	4	4	4	2	2	2	4	4	4	2	2	4	4	4	2	4	4	3	3	2	5	2	4	4	5	2	4	5	4	4	4	4	2	1	4	4	4	5
1	1946	68	3	1	1	2		3	2	5	4	3	3	4	2	4	4	2	4	5	2	2	2	4	4	4	4	5	3	5	1	3	4	4	4	3	4	4	3	5	4	4	4	4	2	5	4	3	1
1	1946	68	3	1	1	4		3	2	4	4	4	4	4	4	3	2	3	4	2	3	2	2	4	4	3	2	2	3	4	1	4	4	3	3	2	3	3	4	4	4	4	4	4	2	3	4	4	2
2	1952	62	3	1	2	4		2	2	5	4	3	5	4	3	2	3	4	3	5	3	3	3	4	2	2	3	4	4	4	2	3	4	4	4	2	2	4	3	5	3	3	4	3	3	4	4	3	3
1	1979	35	2	1	1	3		5	1	4	4	4	4	5	5	2	2	2	4	5	2	4	2	4	4	2	4	4	5	4	1	4	4	4	2	2	2	4	2	3	5	4	4	4	2	4	1	4	2
1	1941	73	3	1	1	2		4	2	5	5	5	4	4	4	2	3	4	3	5	3	4	2	3	4	2	2	4	4	4	1	4	4	2	4	3	3	4	2	3	2	4	4	3	4	4	3	4	3
1	1976	38	2	1	1	1	1	4	1	5	4	3	5	5	4	1	1	1	1	5	5	5	2	5	5	1	3	3	5	5	1	2	1	3	2	5	1	1	5	1	5	5	4	5	1	5	1	5	2
2	1959	55	2	1	1	2		4	2	3	4	3	3	4	5	2	2	4	3	5	2	4	3	4	4	1	4	2	2	4	1	3	4	4	3	4	2	5	3	3	4	4	4	2	4	4	3	4	2
2	1957	57	3	1	2	4		4	2	4	5	4	5	5	5	2	2	3	3	5	3	3	2	4	4	5	5	3	4	5	1	3	2	3	4	1	5	3	2	5	5	5	4	1	2	5	4	3	3
2	1936	78	3	1	1	3		4	3	5	4	5	5	4	5	3	4	1	4	5	3	5	1	5	4	2	3	5	5	5	1	4	2	2	3	3	2	1	3	2	5	4	4	5	2	3	3	5	4
2	1981	33	2	1	1	2	2	5	2	1	5	4	5	4	4	1	3	2	4	5	3	4	2	5	5	1	3	5	4	4	1	5	3	4	3	4	2	3	1	4	4	4	4	4	4	4	4	4	4
1	1938	76	3	1	1	1		2	2	4	4	3	5	5	5	2	3	3	3	5	2	4	2	5	3	3	4	3	2	3	1	3	4	3	3	2	4	4	4	3	4	4	4	3	3	5	5	3	1
2	1994	20	1	2	1	4	1	2	4	3	4	3	1	4	2	5	2	5	4	3	4	4	3	4	5	4	5	1	3	4	1	4	5	4	3	3	4	5	2	3	4	5	4	5	4	5	4	2	4
2	1988	26	1	1	1	1	2	2	4	4	4	4	4	4	3	3	3	3	4	5	4	4	2	4	4	2	5	4	3	4	1	4	4	4	4	2	3	2	3	4	4	4	4	4	4	4	4	4	3
2	1949	65	3	1	2	3		4	3	4	3	4	3	4	4	2	2	3	3	4	2	4	3	2	3	4	4	3	4	5	1	4	4	3	4	5	4	3	3	4	3	4	4	3	3	5	5	4	3
2	1945	69	3	2	1	2		2	2	5	4	3	4	5	2	2	4	2	4	3	4	5	5	5	4	1	3	4	4	5	1	5	2	4	4	4	1	4	5	5	5	5	4	1	3	5	5	3	5
2	1995	19	1	1	2	2	1	3	4	5	5	3	5	5	4	4	2	4	1	5	3	5	3	2	4	5	4	3	5	4	1	1	5	5	4	1	4	2	1	5	4	4	4	4	5	4	4	4	1
2	1953	61	3	1	3	4		2	1	5	5	4	5	5	5	1	2	3	4	5	2	2	2	5	5	2	4	3	4	4	1	4	4	4	5	4	3	3	5	5	5	4	4	3	4	5	2	4	1
2	1950	64	3	2	1	4		3	2	5	4	3	5	4	4	2	3	3	4	5	4	4	2	4	4	2	4	4	3	4	1	3	3	4	4	2	2	3	5	5	5	4	4	2	3	4	4	3	3
2	1944	70	3	1	1	4		2	3	4	3	4	4	4	3	3	3	4	3	5	3	4	3	4	4	2	4	5	3	4	1	5	4	4	4	3	2	3	3	4	4	3	4	3	4	5	3	4	3
2	1989	25	1	1	1	3	1	2	5	3	4	4	4	4	4	5	4	4	2	4	2	4	5	2	2	5	4	2	2	1	2	4	4	4	4	5	5	4	1	5	4	4	4	4	5	4	5	4	2
1	1944	70	3	1	1	2		3	3	5	4	5	5	4	4	1	1	4	4	5	4	4	2	3	4	1	4	5	4	5	1	3	1	5	5	3	1	3	2	5	5	4	4	4	3	5	4	4	3
2	1983	31	2	1	1	2	2	3	4	5	4	4	4	5	4	2	2	4	3	4	2	5	2	5	5	4	4	4	5	4	2	4	4	4	4	1	3	4	2	4	4	4	4	4	2	4	2	4	1
2	1983	31	2	1	2	1	1	3	4	5	4	4	4	5	4	2	2	4	3	4	2	5	2	5	5	4	4	4	5	4	2	4	4	4	4	1	3	4	2	4	4	4	4	4	2	4	2	4	1
1	1947	67	3	1	1	2		3	1	2	5	5	5	5	5	4	2	2	4	3	2	4	3	4	4	1	5	5	5	3	1	4	2	4	3	2	4	4	2	2	3	4	4	3	1	5	5	3	3
2	1954	60	3	2	2	2		2	2	5	5	3	4	5	5	2	1	4	4	5	5	5	1	3	5	2	4	5	4	5	1	2	2	5	5	2	4	3	4	5	5	4	4	1	5	4	4	5	1
2	1954	60	3	2	1	4		4	2	5	4	3	4	5	3	2	2	4	5	5	2	2	4	4	4	2	4	3	5	4	2	4	4	5	5	3	4	3	5	4	5	5	4	2	4	5	5	4	3
2	1952	62	3	1	3	2		5	2	5	4	4	5	4	4	2	2	4	4	5	2	4	2	4	4	2	4	5	5	4	1	4	2	4	5	4	5	3	5	5	5	4	4	2	1	5	5	4	5
2	1945	69	3	1	1	3		5	3	3	4	4	3	5	5	4	3	3	4	5	4	4	3	3	4	2	4	4	5	5	1	3	3	4	4	3	3	5	3	4	4	4	4	2	2	5	5	4	3
1	1951	63	3	2	2	2		4	3	4	4	4	5	4	4	4	3	3	4	5	3	3	3	4	4	2	3	5	3	4	1	4	2	5	5	2	4	3	4	5	5	4	4	2	2	5	5	4	2
1	1949	65	3	1	1	1		4	1	5	5	4	5	4	4	1	2	4	5	5	3	4	1	5	5	1	2	5	4	5	1	4	2	5	5	5	1	3	2	5	5	5	4	4	2	5	4	4	4
2	1958	56	3	1	1	4		4	1	5	5	5	5	5	5	2	4	3	5	5	4	4	1	4	5	1	2	3	5	5	1	3	3	5	5	3	1	3	2	5	5	5	4	5	1	5	5	3	3
2	1966	48	2	1	2	4		4	2	3	4	4	5	5	4	2	3	4	4	5	3	2	4	2	5	3	5	3	4	4	2	5	5	4	5	4	3	4	4	5	5	4	4	4	2	5	4	5	3
2	1948	66	3	1	1	4		3	2	5	5	4	5	4	4	4	3	4	3	5	3	2	2	2	5	3	4	5	4	5	1	3	5	5	5	3	4	3	4	5	5	5	4	1	4	5	5	5	4
2	1995	19	1	2	1	2	3	3	4	3	4	3	2	3	4	4	3	4	3	5	3	3	2	3	3	4	3	2	3	4	3	4	4	4		4	4	4	3	4	3	4	4	3	3	4	4	4	3
2	1963	51	2	1	2	2	2	2	4	4	4	2	5	4	4	5	3	4	3	4	5	4	4	3	4	1	4	4	3	5	1	3	5	4	4	1	2	4	2	3	3	3	4	3	4	4	2	2	3
2	1995	19	1	2	2	4	1	1	3	3	5	3	5	3	4	4	3	4	4	4	3	4	2	3	4	2	4	5	3	2	2	3	4	4	4	2	2	4	3	4	4	3	4	3	4	5	4	4	3
2	1995	19	1	2	2	4	1	3	4	4	4	4	2	4	4	5	4	2	3	3	2	4	4	3	3	4	4	2	3	2	1	4	4	4	3	3	5	4	2	4	2	4	4	3	4	5	2	4	2
1	1991	23	1	1	2	1	1	2	4	2	4	4	3	4	4	4	3	2	2	5	2	3	4	3	3	3	4	2	3	3	2	3	4	4	3	2	4	4	2	2	3	3	4	3	3	4	2	3	2
2	1990	24	1	1	1	3	1	3	3	4	4	4	5	4	4	3	2	3	4	4	3	4	2	4	4	2	4	4	4	5	1	3	2	3	4	3	2	3	2	5	5	5	4	4	3	4	4	4	1
1	1987	27	1	2	1	2	2	4	2	2	4	5	2	4	4	4	5	1	3	4	2	2	2	3	5	4	2	2	5	4	1	5	2	3	4	4	3	5	4	4	2	4	4	5	2	4	4	4	4
2	1985	29	1	2	1	4	1	3	5	2	5	3	4		4	5	3	2	4	4	2	3	5	2	2	4	4	3	3	4	1	4	3	3	5	4	5	4	1	4	5	4	4	4	4	5	5	4	4
2	1971	43	2	1	1	1	1	4	3	2	4	3	4	4	4	4	3	4	2	5	2	4	3	4	4	4	4	4	4	4	4	4	4	4	4	4	4	4	3	4	2	4	4	4	2	4	4	4	4
2	1971	43	2	1	1	2	1	3	2	4	5	4	4	5	4	2	2	4	4	5	3	3	2	4	5	1	2	5	4	5	2	3	1	5	5	4	2	1	3	5	5	4	4	3	2	5	4	4	3
2	1956	58	3	1	1	1	1	4	4	3	5	5	3	5	2	3	2	2	3	5	2	4	3	2	4	4	4	5	5	5	1	4	2	5	4	1	4	5	2	2	4	4	4	4	5	4	3	3	1
2	1954	60	3	2	1	3	2	4	3	2	4	3	2	3	5	4	3		4	5	4	5	4	2	4	1	5	2	3	4	1	4	2	4	4	3	2	5		2	2	3	4		3	5	4		3
2	1953	61	3	1	1	3	3	3	2	4	2	4		2	4	3	2	4	3	5	3	4	1	4	5	2	3	4	4	5	1	3	4	4	4	4	3	2	2	4	4	1	4	2	2	4	4	3	4
1	1947	67	3		1	1		3	4	3	3	3	2	3	4	3	3	3	2	2	3	2	4	2	1	3	3	2	3	3	1	3	3	3	3	4	3	4	2	3	3	4	4	3	4	3	4	2	4
1	1932	82	3	2	2	3		3	2	5	5	4	5	3	4	1	4	2	4	3	3	4	3	2	4	4	4	3	4	4	1	4	2	2	4	3	2	4	1	5	2	4	4	3	2	3	4	4	4
2	1995	19	1	2	1	2	1	3	4	4	3	3	4	3	3	4	2	2	2	4	1	1	3	4	3	4	4	2	3	3	1	3	4	4	3	2	4	3	3	2	3	3	4	4	3	4	3	4	2
1	1991	23	1	2	2	2	1	4	3	3	5	4	3	5	3	2	2	2	2	5	2	2	2	3	2	4	3	1	4	4	2	4	3	3	4	3	5	3	2	3	4	5	4	3	3	5	4	3	4
1	1977	37	2	1	1	2	2	4	2	5	4	5	3	4	4	2	2	3	3	5	1	4	4	4	5	2	4	4	5	5	1	3	3	2	2	4	2	4	2	3	2	4	4	3	2	4	5	4	3
2	1945	69	3	2	1	4		2	2	3	4	4	2	3	4	4	4	2	3	4	2	2	3	4	4	4	4	2	3	4	2	3	4	2	3	4	4	2	4	3	3	4	4	3	3	5	2	4	2
1	1991	23	1	2	1	2	1	2	4	2	4	4	3	4	4	4	3	2	2	5	2	3	4	3	3	3	4	2	3	3	2	3	4	4	3	2	4	4	2	2	3	3	4	3	3	4	2	3	2
2	1942	72	3	1	1	2		2	3	3	4	2	5	3	4	4	3	2	4	5	3	2	2	3	2	4	4	4	3	3	2	4	2	4	4	3	3	3	4	5	5	3	4	2	4	4	4	2	3
1	1952	62	3	1	1	4		4	1	3	4	3	3	5	2	2	2	3	2	4	1	2	2	4	4	2	4	3	3	5	1	3	2	3	4	4	1	5	5	4	5	3	4	2	2	4	5	5	5
2	1994	20	1	2	2	4	1	4	2	4	5	3	3	4	2	3	3	1	3	5	2	2	2	5	4	4	2	3	4	4	1	5	2	4	4	3	4	3	3	5	5	3	4	2	3	4	3	2	3
2	1949	65	3	2	1	1		4	2	4	4	5	3	4	5	2	4	2	4	5	2	3	3	4	4	2	3	4	4	3	1	4	2	3	3	3	2	3	2	4	4	4	4	2	2	3	3	5	3
2	1997	17	1	2	3	2	1	2	1	4	5	3	2	3	4	3	3	3	4	1	1	3	2	2	4	2	4	1	5	3	1	4	1	2	4	4	2	4	4	4	3	5	4	4	1	5	3	5	3
2	1951	63	3	1	1	3		4	2	5	4	3	5	5	4	3	2	3	3	5	2	4	1	5	5	2	5	4	4	3	1	2	4	2	3	3	2	2	1	4	5	4	4	4	3	4	3	3	1
1	1946	68	3	1	1	3		4	2	5	4	4	5	4	5	2	1	2	3	4	2	2	1	5	3	1	3	3	5	5	1	3	2	2	4	3	1	4	3	3	4	4	4	3	2	2	2	3	3
2	1988	26	1	2	1	4	3	3	2	2	5	5	2	3	4	4	4	2	4	4	1	5	5	1	3	2	5	2	4	2	2	4	2	3	4	4	5	2	4	3	2	4	4	5	4	3	2	5	4
1	1988	26	1	2	1	1	1	1	1	4	2	5	5	5	5	1	1	4	3	4	4	4	2	5	4	5	2	5	2	5	1	5	1	2	4	1	5	4	1	1	4	4	4	5	3	4	2	4	2
1	1988	26	1	1	1	3	3	1	1	4	2	5	5	5	5	1	1	4	3	4	4	4	2	5	4	5	2	5	2	5	1	5	1	2	4	1	5	4	1	1	4	4	4	5	3	4	2	4	2
2	1961	53	2	1	2	4		4	4	1	4	5	2	5	5	4	3	4	3	5	3	1	1	2	4	3	5	3	3	4	1	3	4	4	3	2	4	4	1	3	3	4	4	4	4	3	2	4	1
1	1949	65	3	1	1	2		3	4	3	4	3	4	4	4	4	2	3	3	4	3	4	2	3	4	2	3	4	5	4	1	3	4	4	4	3	3	4	2	5	4	3	4	3	3	5	2	4	1
1	1947	67	3	1	1	2		3	2	5	4	5	5	4	3	2	2	3	4	5	2	2	3	4	4	3	4	4	3	4	1	4	5	5	4	3	2	3	2	4	4	4	4	1	2	4	4	3	2
1	1995	19	1	2	1	2	1	4	2	5	4	4	3	5	4	3	2	3	3	1	3	5	4	3	5	5	3	2	5	5	1	2	2	1	4	1	4	2	2	4	4	4	4	5	1	4	4	5	3
2	1966	48	2	1	2	2		3	2	4	4	4	5	4	4	1	2	4	4	5	2	2	2	4	4	2	4	5	4	4	1	3	2	4	4	4	4	2	3	5	4	4	4	2	1	4	2	4	3
2	1953	61	3	2	1	1	2	3	2	4	2	4	3	2	4	3	2	4	3	5	3	4	1	4	5	2	3	4	4	5	1	3	4	4	4	4	3	2	2	4	4	1	4	2	2	4	4	3	4
1	1939	75	3	1	1	4		3	4	2	4	2	3	4	4	4	4	4	4	4	4	4	2	4	3	2	4	2	2	2	1	4	4	2	4	2	4	4	4	4	4	4	4	4	4	5	4	3	1
2	1978	36	2	2	1	1	1	3	3	4	4	4	4	4	4	3	2	2	3	5	4	4	3	4	4	3	3	4	3	4	2	3	2	4	4	3	3	3	4	4	4	4	4	2	4	4	4	4	2
2	1955	59	3	2	1	2	2	3	2	4	4	4	4	5	3	3	2	3	4	5	2	4	3	4	4	2	4	3	2	4	2	5	4	4	4	4	4	3	4	4	4	4	4	2	3	3	4	4	2
2	1955	59	3	1	2	1	1	3	2	4	4	4	4	5	3	3	2	3	4	5	2	4	3	4	4	2	4	3	2	4	2	5	4	4	4	4	4	3	4	4	4	4	4	2	3	3	4	4	2
1	1953	61	3	2	1	2		3	2	2	5	4	4	5	5	2	1	4	3	4	3	3	1	4	5	1	2	5	5	5	1	5	2	3	4	3	3	3	3	3	4	4	4	3	1	5	5	3	3
2	1996	18	1	1	2	4	1	2	2	3	5	4	5	5	3	4	2	4	3	5	3	4	2	3	5	2	4	3	4	4	1	3	4	4	2	2	3	5	5	4	3	4	4	3	4	5	4	5	1
2	1971	43	2	2	1	1	2	4	3	2	4	3	4	4	4	4	3	4	2	5	2	4	3	4	4	4	4	4	4	4	4	4	4	4	4	4	4	4	3	4	2	4	4	4	2	4	4	4	4
1	1972	42	2	1	1	2	1	3	2	4	5	4	5	4	5	2	2	2	3	4	3	4	1	4	4	1	3	4	2	4	1	4	4	3	4	4	2	4	1	3	3	4	4	4	2	5	4	4	4
2	1989	25	1	1	2	1	2	2	2	4	2	5	5	4	3	2	2	3	3	5	3	4	2	5	4	4	2	4	4	4	1	3	5	4	3	3	4	2	1	5	5	3	4	4	5	4	2	3	3
2	1989	25	1	2	1	1	1	2	2	4	2	5	5	4	3	2	2	3	3	5	3	4	2	5	4	4	2	4	4	4	1	3	5	4	3	3	4	2	1	5	5	3	4	4	5	4	2	3	3
2	1962	52	2	2	1	2	1	2	2	5	5	2	5	4	5	3	2	3	4	5	4	4	2	4	5	2	4	5	4	5	1	3	3	5	3	4	3	1	1	5	5	4	4	1	2	5	5	4	3
2	1994	20	1	2	1	2	1	3	4	5	5	4	5	5	4	4	2	3	2	5	2	5	3	5	5	2	4	2	5	5	1	4	3	4	5	3	3	4	2	5	5	5	4	4	3	4	4	5	2
2	1996	18	1	2	1	4	1	3	4	4	4	4	2	5	2	5	2	2	3	5	2	3	5	4	5	4	4	2	3	5	1	2	5	5	3	3	3	5	2	5	4	4	4	3	4	5	4	4	3
2	1983	31	2	2	1	2	1	3	2	4	4	4	4	5	4	4	2	3	2	4	4	4	2	4	4	2	4	3	2	4	3	2	4	5	5	1	3	4	1	5	3	5	4	5	2	5	4	5	1
1	1953	61	3	1	1	4		2	2	4	5	4	4	4	4	2	3	2	4	5	4	3	3	4	4	2	4	4	4	4	1	3	4	4	4	3	2	4	4	5	4	4	4	3	2	5	2	3	3
2	1992	22	1	1	1	2	2	5	1	3	2	4	5	4	2	4	1	1	3	5	2	1	3	4	4	4	2	3	5	4	1	5	2	2	1	5	4	2	5	3	5	4	4	3	3	3	5	4	4
2	1992	22	1	1	2	1	1	5	1	3	2	4	5	4	2	4	1	1	3	5	2	1	3	4	4	4	2	3	5	4	1	5	2	2	1	5	4	2	5	3	5	4	4	3	3	3	5	4	4
2	1950	64	3	1	2	2		3	2	5	5	4	4	5	5	2	2	3	4	5	4	2	3	4	5	1	5	3	4	5	1	5	4	5	5	3	1	4	3	4	5	4	4	3	4	5	5	5	3
1	1942	72	3	1	1	3		4	2	5	5	3	4	5	5	2	3	4	5	3	4	4	1	5	5	1	3	5	5	5	1	5	2	4	4	5	1	4	2	5	5	5	4	3	4	2	5	3	5
2	1975	39	2	1	1	1	2	4	4	4	4	5	3	4	5	5	1	3	3	4	2	3	1	4	4	2	4	5	5	4	1	5	4	4	4	4	4	4	2	4	4	4	4	4	2	5	3	4	4
2	1970	44	2	2	1	4	2	1	2	5	5	3	5	4	4	2	1	5	3	5	3	4	3	5	4	2	4	2	4	4	3	3	4	4	4	2	2	2	2	5	4	3	4	2	5	5	4	4	1
2	1997	17	1	2	1	4	2	2	4	2	4	3	3	3	4	5	4	3	3	3	2	3	5	2	2	4	3	2	4	3	2	4	2	3	2	3	4	4	2	3	3	4	4	4	4	3	3	4	3
2	1996	18	1	2	1	3	1	2	4	3	3	3	2	3	2	4	3	2	2	4	3	1	4	3	2	4	4	3	3	2	2	2	2	3	4	2	5	3	3	4	3	2	4	3	4	4	2	3	2
2	1996	18	1	1	1	2	1	3	2	5	5	5	5	5	5	4	4	3	2	5	3	2	1	4	2	5	3	5	5	5	1	3	2	5	5	3	5	3	3	5	5	4	4	3	2	5	5	5	1
2	1962	52	2	2	1	1	1	2	4	5	4	4	5	4	2	4	2	2	2	5	2	4	4	5	5	2	4	2	5	5	1	5	2	2	4	2	2	2	4	5	5	5	4	2	4	4	1	5	2
2	1956	58	3	1	1	2	1	2	2	5	5	4	5	5	5	2	2	2	2	5	2	1	1	4	4	1	4	5	4	4	1	4	2	4	4	2	1	2	2	4	5	5	4	4	2	5	4	4	1
1	1944	70	3	1	2	1	1	4	2	5	4	4	4	4	4	2	3	3	3	4	3	2	3	4	4	3	4	4	4	4	2	4	2	3	4	3	3	3	3	3	4	4	4	3	2	4	4	3	3
1	1995	19	1	2	2	4	2	1	2	4	5	2	1	5	1	5	2	2	1	5	1	2	5	5	2	4	5	1	2	1	1	4	3	4	2	3	5	3	1	4	4	1	4	2	4	5	5	4	1
1	1982	32	2	1	1	2	1	4	4	2	2	3	2	4	3	5	2	4	2	2	3	2	3	4	4	2	4	2	3	3	1	3	3	3	3	2	2	3	2	4	4	2	4	3	4	2	5	2	2
2	1983	31	2	1	2	3	1	4	3	5	3	5	2	4	4	1	3	2	2	5	2	3	1	5	3	1	1	5	5	5	1	3	2	3	3	2	1	1	4	2	5	4	4	4	1	3	4	2	1
1	1996	18	1	1	1	4	1	2	3	4	4	4	1	4	2	4	4	2	1	2	1	3	2	3	2	5	3	3	4	3	1	5	2	2	4	2	5	2	2	3	3	2	4	2	1	2	3	4	3
1	1949	65	3	1	1	4		4	3	3	4	3	3	3	2	3	3	2	3	5	3	3	4	3	3	2	3	3	2	4	1	3	3	3	3	3	3	3	3	3	4	2	4	3	2	4	2	3	3
2	1984	30	1	2	1	2	2	1	5	2	2	3	2	4	3	4	4	2	2	5	5	4	4	5	3	5	2	5	5	5	1	1	5	4	2	1	2	2	1	5	4	4	4	2	4	5	4	2	1
1	1948	66	3	1	1	4		3	2	4	5	3	2	4	5	5	2	1	2	5	2	1	5	2	4	4	4	4	2	5	1	3	1	4	5	2	5	2	1	3	4	1	4	1	4	5	5	1	1
2	1948	66	3	1	1	1		4	2	4	4	4	3	4	4	1	2	3	3	5	3	4	3	4	4	1	4	5	4	4	1	4	4	4	4	2	1	1	1	5	4	5	4	1	2	5	3	4	1
2	1996	18	1	2	1	4	2	3	4	3	4	3	4	4	3	4	2	3	4	4	2	2	4	2	3	4	4	2	4	3	3	3	2	2	3	3	4	2	4	4	2	3	4	2	3	4	4	3	3
1	1951	63	3	1	1	3		4	2	4	4	4	4	5	4	4	2	3	3	5	2	1	2	4	5	4	4	3	5	5	1	5	2	4	4	3	4	4	1	3	3	4	4	3	2	4	2	4	2
1	1923	91	3	1	1	3		2	2	4	4	4	3	4	4	2	2	2	4	2	2	4	1	2	4	2	4	3	2	4	1	3	4	4	5	3	2	2	1	4	4	4	4	2	2	5	4	3	3
2	1936	78	3	1	1	4		3	2	4	5	4	4	4	2	2	2	2	3	4	4	4	1	4	5	2	4	3	3	3	1	3	5	4	3	3	2	2	2	3	4	3	4	2	3	4	4	5	3
2	1958	56	3	1	1	3		3	2	2	4	5	3	5	4	2	4	4	2	5	4	4	4	1	2	3	4	2	5	4	1	4	2	4	4	3	2	4	2	5	2	3	4	2	2	5	4	3	3
2	1948	66	3	2	1	2		2	2	5	5	3	5	4	4	2	2	5	2	5	3	1	2	4	5	2	3	2	4	5	1	3	3	5	4	2	3	3	5	5	5	4	4	1	2	5	5	5	1
2	1996	18	1	2	1	4	2	2	5	2	3	2	1	4	2	5	2	3	2	5	1	4	4	2	2	5	3	2	3	4	2	4	3	4	3	1	5	4	1	3	4	2	4	3	2	4	4	4	3
2	1996	18	1	1	4	1	1	2	5	2	3	2	1	4	2	5	2	3	2	5	1	4	4	2	2	5	3	2	3	4	2	4	3	4	3	1	5	4	1	3	4	2	4	3	2	4	4	4	3
2	1995	19	1	2	1	2	2	2	5	2	4	2	2	4	3	4	2	4	3	2	2	4	4	3	4	4	4	2	3	4	1	4	4	2	2	2	4	3	4	2	4	4	4	2	4	2	4	4	4
2	1995	19	1	1	2	1	1	2	5	2	4	2	2	4	3	4	2	4	3	2	2	4	4	3	4	4	4	2	3	4	1	4	4	2	2	2	4	3	4	2	4	4	4	2	4	2	4	4	4
2	1954	60	3	2	1	3		3	2	4	5	5	3	4	5	4	4	4	3	3	2	4	2	4	4	4	4	4	5	4	2	4	2	2	4	2	3	4	2	4	4	4	4	3	4	3	4	3	1
2	1952	62	3	2	1	3		2	2	2	5	5	2	5	4	3	4	2	5	5	3	4	1	2	4	1	4	3	4	5	1	5	2	3	4	4	2	4	3	5	1	4	4	3	1	1	5	4	5
2	1996	18	1	2	1	2	1	4	1	3	5	5	3	4	5	4	2	3	3	2	1	2	4	1	2	3	2	1	4	4	1	4	1	2	4	5	4	3	3	4	3	4	4	5	1	5	4	5	5
2	1992	22	1	1	1	2		5	3	2	4	5	2	5	4	1	2	2	3	5	3	2	4	5	2	3	4	4	5	5	2	5	3	3	2	1	2	3	1	2	5	4	4	5	1	5	4	5	1
2	1952	62	3	1	1	2		3	2	5	4	5	4	4	4	2	3	2	3	5	3	4	1	5	5	1	2	4	2	3	1	3	4	2	4	3	3	3	1	5	5	5	4	4	3	4	3	4	3
1				1	1	1	1	2	2	5	5	4	5	3	4	1	1	3	3	5	4	4	2	5	2	2	3	4	4	5	1	4	3	4	3	2	3	2	2	3	4	4	4	3	2	5	3	4	1
1	1992	22	1	2	1	2	1	3	5	2	5	3	2	4	3	5	2	3	1	4	3	4	3	1	2	5	4	4	4	4	1	4	2	4	4	2	5	1	2	5	2	3	4	3	5	5	3	4	2
2	1983	31	2	1	2	3	1	3	4	3	4	4	5	4	4	4	2	4	3	5	1	4	2	2	3	5	2	4	3	5	1	5	4	4	4	2	4	3	4	4	3	5	4	5	4	3	4	4	4
2	1945	69	3	1	1	4		2	2	5	5	4	5	4	3	4	4	4	4	5	5	4	1	5	5	1	4	5	5	5	1	4	2	5	5	2	1	5	3	5	4	5	4	4	4	5	4	4	1
1	1988	26	1	2	1	1	1	4	2	5	4	4	5	3	3	3	2	3	4	5	1	4	3	4	4	3	4	3	4	4	1	3	2	3	4	4	4	3	4	4	4	4	4	4	2	4	4	4	4
1	1988	26	1	1	1	1	1	4	2	5	4	4	5	3	3	3	2	3	4	5	1	4	3	4	4	3	4	3	4	4	1	3	2	3	4	4	4	3	4	4	4	4	4	4	2	4	4	4	4
2	1954	60	3	1	1	2		2	2	5	4	4	4	4	4	1	1	3	4	5	5	2	2	5	5	2	4	5	3	4	1	1	5	5	5	1	1	1	1	5	5	3	4	3	2	5	5	5	1
2	1968	46	2	1	2	1	1	3	4	4	4	4	3	5	4	4	2	5	3	5	2	3	4	2	4	5	5	1	4	4	1	4	5	5	4	2	4	2	2	2	3	4	4	2	2	5	4	3	2
2	1997	17	1	2	1	4	1	4	3	4	4	4	2	5	4	2	2	3	2	4	1	1	3	1	5	3	4	4	5	5	1	5	4	4	4	2	4	2	5	4	2	4	4	5	3	4	4	3	3
2	1952	62	3	2	2	4		4	3	2	5	4	3	5	4	3	2	4	4	5	2	4	4	4	4	2	4	4	4	3	1	3	4	4	5	3	4	4	3	4	3	3	4	1	3	5	5	4	3
1	1951	63	3	1	1	2		4	2	4	5	4	4	5	5	3	2	3	5	2	2	4	3	4	3	2	4	3	5	3	2	4	2	2	4	4	2	3	2	4	3	4	4	4	2	5	2	4	4
2	1997	17	1	2	2	4	1	4	2	5	4	4	5	4	4	2	4	2	3	5	2	2	2	5	4	4	4	2	4	4	1	4	2	4	4	1	4	4	4	4	4	4	4	5	1	5	4	4	5
2	1939	75	3	2	2	2		3	2	5	4	3	5	4	4	2	3	4	4	5	4	4	3	4	5	2	4	5	3	4	1	3	2	4	5	3	2	3	3	5	4	3	4	2	4	4	4	4	2
2	1954	60	3	1	1	3		4	3	4	5	2	4	4	4	4	2	4	4	5	3	5	2	4	5	3	5	4	4	3	1	4	5	5	5	4	4	4	3	5	4	3	4	2	3	4	5	5	2
2	1949	65	3	2	1	2		4	2	5	3	4	5	5	4	1	3	3	3	5	4	1	2	5	4	3	4	3	4	5	1	3	5	4	5	3	3	3	4	5	5	3	4	2	3	5	5	4	3
2	1947	67	3	1	1	4		4	2	5	4	3	5	4	4	2	2	2	4	5	3	4	3	5	5	1	3	3	4	5	1	4	3	2	4	4	2	4	5	5	4	4	4	1	2	4	4	4	3
2	1989	25	1	1	1	4	1	3	4	4	4	2	4	5	4	5	2	2	2	5	1	4	4	4	4	4	5	1	4	4	1	4	2	4	5	4	4	3	2	4	5	4	4	4	5	5	5	4	4
1	1946	68	3	1	1	1		2	2	5	5	5	5	5	4	2	1	2	5	5	3	5	1	5	5	1	3	3	4	3	2	5	2	3	4	4	1	2	3	5	5	4	4	3	3	4	4	4	5
2	1984	30	1	1	2	4	1	2	5	3	4	4	5	5	3	2	2	3	3	5	4	5	4	4	4	2	4	4	5	4	5	4	4	5	4	1	2	4	2	5	5	4	4	5	5	5	4	4	1
2	1955	59	3	1	1	2		3	1	5	4	4	5	4	5	1	1	4	4	5	4	4	1	5	5	1	2	5	4	5	1	4	5	4	4	3	1	4	5	5	5	5	4	3	2	5	3	4	3
2	1955	59	3	1	2	3		3	2	3	5	5	2	5	3	4	2	2	5	5	2	4	5	2	3	1	4	3	4	5	5	5	1	2	4	5	2	5	5	4	3	5	4	4	2	2	4	5	3
2	1946	68	3	1	1	4		4	4	5	4	4	5	5	4	4	2	4	4	5	4	2	1	4	4	3	4	4	4	4	1	4	4	5	4	3	2	2	5	5	5	4	4	3	4	5	4	3	4
2	1952	62	3	1	1	4		4	2	4	4	4	3	4	4	3	2	4	4	5	2	1	3	3	5	4	4	5	5	5	1	3	5	5	3	3	4	4	5	5	4	3	4	2	3	5	5	3	1
2	1991	23	1	2	2	2	1	2	4	4	5	4	5	4	4	4	2	3	3	5	2	3	2	4	4	4	4	3	4	4	1	3	4	3	4	3	4	4	4	5	4	4	4	5	2	5	4	4	3
2	1994	20	1	1	2	4	1	2	4	3	4	4	3	3	4	5	2	2	3	5	3	4	5	5	3	4	2	5	3	4	1	2	2	2	4	2	5	5	2	4	3	4	4	4	4	5	4	4	3
2	1992	22	1	2	1	4	2	3	4	4	5	3	3	5	4	4	4	2	4	5	2	5	3	5	5	3	3	5	4	5	1	3	3	5	4	2	2	5	3	4	4	5	4	3	4	5	5	4	4
2	1992	22	1	1	4	1	1	3	4	4	5	3	3	5	4	4	4	2	4	5	2	5	3	5	5	3	3	5	4	5	1	3	3	5	4	2	2	5	3	4	4	5	4	3	4	5	5	4	4
1	1944	70	3	1	1	1		5	2	3	4	4	5	5	5	3	3	2	3	5	4	5	2	4	3	2	4	5	5	5	1	4	3	3	2	1	1	4	4	5	4	4	4	5	2	3	5	4	3
2	1954	60	3	2	1	2		4	4	4	4	3	5	5	4	3	3	3	4	5	3	4	3	5	4	2	4	5	3	4	1	4	3	4	4	2	2	4	5	5	5	4	4	1	3	5	4	4	5
2	1961	53	2	2	2	1		4	2	4	4	5	5	5	4	2	2	3	5	2	2	4	2	4	4	2	4	3	4	4	1	5	2	3	4	5	2	4	5	3	4	5	4	5	3	5	4	4	5
2	1945	69	3	1	1	4		1	5	3	5	4	2	5	4	5	5	5	4	5	1	2	5	1	1	4	5	1	5	2	1	5	5	5	5	5	5	5	5	5	2	4	4	3	2	5	5	5	3
2	1968	46	2	1	2	1	2	4	3	4	4	5	5	5	5	2	1	3	4	5	4	5	1	4	4	2	4	3	5	5	1	5	3	4	4	4	2	3	3	5	5	5	4	4	2	4	5	5	5
2	1968	46	2	2	1	1	1	4	3	4	4	5	5	5	5	2	1	3	4	5	4	5	1	4	4	2	4	3	5	5	1	5	3	4	4	4	2	3	3	5	5	5	4	4	2	4	5	5	5
2	1951	63	3	2	1	4		4	2	4	5	3	5	5	5	2	1	2	5	4	1	5	2	5	5	1	5	4	5	5	1	5	2	3	4	5	2	5	2	3	5	5	4	2	2	5	5	5	5
1				1	1	2	2	2	2	5	5	4	5	3	4	1	1	3	3	5	4	4	2	5	2	2	3	4	4	5	1	4	3	4	3	2	3	2	2	3	4	4	4	3	2	5	3	4	1
2	1996	18	1	1	2	4	1	4	3	2	4	3	5	4	4	4	3	2	3	2	2	3	3	4	3	3	4	1	4	4	1	4	4	2	3	2	4	4	3	3	4	4	4	5	4	2	4	4	4
2	1983	31	2	1	1	2	3	2	3	4	5	4	5	5	5	2	2	4	3	4	3	3	2	2	4	3	3	3	4	4	2	4	3	3	4	2	3	4	5	5	3	5	4	3	4	5	2	4	2
2	1996	18	1	2	1	4	1	3	3	4	5	4	2	4	4	4	2	2	3	4	3	4	2	4	3	3	4	2	4	4	1	4	2	4	3	4	3	2	3	4	4	4	4	5	3	4	3	3	4
1	1993	21	1	2	2	2	1	3	1	4	4	4	5	4	3	1	2	3	4	4	2	2	1	5	5	2	4	3	5	5	1	3		4	4	1	2	2	2	1	4	4	4	5	1	5	3	4	3
2	1988	26	1	1	1	1	1	4	2	4	4	5	4	5	4	2	3	3	3	5	4	4	1	5	5	1	4	4	3	4	1	4	5	3	5	3	2	4	3	5	5	4	4	4	2	4	4	5	4
2	1988	26	1	2	4	1	1	3	4	4	4	4	3	4	3	4	2	3	3	5	2	2	3	4	4	4	4	4	3	4	1	3	3	4	4	2	4	3	4	4	4	3	4	2	4	4	4	4	2
2	1976	38	2	1	2	2	1	3	3	3	4	4	4	4	4	2	2	4	4	5	3	3	2	3	4	2	4	4	5	4	1	4	4	3	3	3	1	2	4	5	4	4	4	5	4	3	4	4	4
2	1969	45	2	1	1	2	1	2	2	2	4	4	2	5	5	5	4	3	2	5	2	4	5	2	4	4	3	4	5	5	1	4	4	4	4	1	4	2	2	4	3	2	4	2	2	4	4	4	1
2	1969	45	2	1	1	2	2	4	2	2	5	5	4	5	5	2	2	5	4	5	2	5	3	2	5	1	4		3	5	1	5	5	5	5	4	2	4	5	5	4	5	4	4	2	5	5	4	2
1	1967	47	2	1	1	1	1	3	2	4	5	4	5	5	4	2	2	2	4	5	2	2	2	3	2	2	4	2	2	4	1	5	4	4	5	4	3	2	2	4	4	4	4	2	2	5	4	4	4
2	1961	53	2	2	1	4	1	4	2	3	4	5	3	4	5	4	3	3	4	4	2	4	1	3	2	2	5	1	5	4	1	4	4	2	3	3	2	5	2	4	4	5	4	4	2	4	5	4	3
2	1960	54	2	1	2	1	1	3	2	5	5	4	5	5	5	2	2	4	4	5	3	2	2	4	5	2	4	3	5	5	1	3	4	4	4	3	2	2	4	5	5	4	4	3	4	5	1	4	3
1	1960	54	2	1	1	1	2	4	3	4	2	3	5	3	4	3	2	2	3	4	3	2	1	3	4	2	2	4	3	5	1	3	1	2	1	1	2	3		2	4	4	4	3	3	4	2	4	3
1	1935	79	3	1	2	4		4	2	2	5	4	3	4	3	2	3	2	4	4	2	1	1	4	4	3	3	3	4	4	1	4	2	3	3	3	4	3	2	2	3	3	4	3	2	3	4	5	3
1	1990	24	1	1	1	3	1	4	3	5	4	4	3	3	4	3	2	2	3	3	4	3	4	4	2	4	3	3	1	5	1	3	3	2	2	3	3	4	1	3	5	3	4	4	2	4	4	4	3
2	1943	71	3	1	1	3		3	2	2	4	3	5	4	3	4	3	2	4	5	2	2	3	2	3	2	4	2	3	4	1	3	4	4	4	3	3	2	3	3	3	3	4	2	3	4	4	3	3
2	1953	61	3	2	2	2		1	2	4	5	5	3	5	4	2	2	3	3	5	2	1	4	5	2	4	2	4	5	5	4	4	4	2	4	2	4	2	3	5	4	5	4	3	1	5	5	5	1
2	1947	67	3	1	2	1		4	3	3	3	4	3	4	3	2	3	3	3	3	2	3	3	3	3	2	4	3	4	3	1	4	3	3	4	3	3	4	3	4	4	4	4	4	2	5	4	4	4
1	1977	37	2	1	1	2	2	3	4	2	3	4	3	5	3	5	2	4	3	5	3	4	3	2	3	5	4	2	4	3	1	4	2	4	4	2	4	3	1	3	4	3	4	3	4	5	4	3	3
2	1985	29	1	1	2	2	1	2	4	3	4	3	3	5	2	4	3	2	3	5	2	2	5	2	3	4	3	4	3	5	1	3	2	5	4	2	5	4	2	4	3	4	4	3	4	5	1	4	1
2	1956	58	3	1	1	2		5	2	3	4	2	2	5	5	4	4	2	4	5	1	1	5	4	1	1	1	4	5	5	1	4	1	4	4	5	1	2	4	5	3	5	4	4	2	4	3	4	4
1	1945	69	3	1	1	4		3	4	2	4	2	4	4	3	4	2	2	4	3	2	4	5	2	4	4	5	1	3	2	1	3	2	2	3	3	4	4	3	2	2	4	4	4	4	4	3	4	3
1	1954	60	3	1	2	4		3	2	3	4	3	5	4	3	4	3	4	4	4	2	3	3	4	4	3	4	3	3	4	1	3	3	4	4	3	4	3	2	3	5	4	4	4	2	5	3	4	3
1	1950	64	3	1	2	1		2	2	4	4	5	5	4	5	2	3	2	3	5	2	2	1	5	4	3	4	4	4	5	1	3	3	4	2	3	3	2	1	4	5	3	4	4	2	4	3	2	2
2	1954	60	3	2	2	2		4	2	4	4	4	5	4	4	1	4	2	3	5	3	2	2	4	4	2	2	4	4	4	1	3	2	3	4	3	3	3	3	3	3	4	4	2	2	3	3	3	3
1	1994	20	1	2	2	4	1	3	3	3	5	5	3	4	4	3	2	4	2	5	3	1	3	3	4	2	4	4	4	5	1	2	2	4	5	2	3	2	3	4	5	4	4	3	4	5	5	3	1
1	1942	72	3	1	1	1		4	2	5	4	4	5	4	4	3	2	2	3	4	3	3	2	4	4	2	3	5	4	5	1	4	2	4	4	3	3	3	3	4	4	4	4	3	2	4	4	3	2
2	1955	59	3	2	2	2		4	3	5	3	4	4	4	3	2	2	3	4	5	5	3	2	5	5	2	3	5	4	5	1	4	2	2	5	4	3	3	2	5	5	4	4	3	3	5	2	4	1
2	1952	62	3	1	2	2		3	2	5	4	3	4	5	4	1	2	4	2	5	3	3	2	4	4	1	5	5	2	5	1	2	4	4	5	1	2	3	1	5	4	3	4	1	3	5	4	3	2
2	1974	40	2	1	1	2	2	3	4	4	4	4	5	5	5	5	2	5	3	5	2	4	2	4	3	4	4	3	4	4	1	3	3	4	3	3	4	1	2	3	4	3	4	3	3	4	4	4	3
2	1974	40	2	1	2	1	1	3	4	4	4	4	5	5	5	5	2	5	3	5	2	4	2	4	3	4	4	3	4	4	1	3	3	4	3	3	4	1	2	3	4	3	4	3	3	4	4	4	3
2	1948	66	3	2	1	2		3	3	4	4	4	2	4	4	3	4	2	4	3	2	3	3	3	4	2	4	3	4	4	1	4	2	4	3	4	3	4	2	4	4	3	4	2	2	4	4	4	3
2	1995	19	1	1	2	4	1	4	2	5	4	3	5	3	4	1	3	4	2	5	3	4	1	5	5	1	4	4	4	3	1	1	4	4	5	1	1	4	4	5	5	4	4	4	4	5	4	4	1
2	1988	26	1	2	2	4	2	3	4	4	4	4	3	4	3	4	2	3	3	5	2	2	3	4	4	4	4	4	3	4	1	3	3	4	4	2	4	3	4	4	4	3	4	2	4	4	4	4	2
1	1955	59	3	2	1	2		3	2	4	5	4	4	5	4	3	2	2	4	4	3	5	3	4	4	3	5	3	3	4	1	4	4	4	4	3	3	4	2	4	4	4	4	2	2	4	3	4	2
2	1997	17	1	2	1	4	1	4	3	3	4	4	5	4	4	3	2	4	4	4	4	5	2	4	4	2	3	3	4	4	1	3	2	4	3	2	4	2	4	3	2	3	4	5	4	5	3	3	1
1	1996	18	1	2	1	4	2	3	2	5	4	4	5	4	4	2	3	2	4	3	2	4	2	4	5	2	2	4	5	5	1	4	3	1	1	2	2	2	4	4	4	5	4	5	3	3	4	2	4
1	1996	18	1	2	1	4	1	2	2	3	4	4	3	3	5	2	2	1	5	4	2	2	1	4	3	3	3	3	5	4	1	4	2	2	4	4	3	3	3	4	2	5	4	5	2	3	4	3	2
2	1991	23	1	1	1	2	3	2	4	4	5	4	2	5	4	2	2	2	4	5	1	2	3	4	2	4	4	4	5	4	1	2	4	2	4	2	4	4	3	4	4	4	4	4	4	5	4	4	1
2	1981	33	2	1	2	1	1	2	5	3	3	3	4	4	4	5	2	3	3	5	3	2	4	2	3	3	4	4	4	4	1	4	3	3	3	2	3	2	2	4	2	4	4	1	2	5	4	4	2
1	1976	38	2	1	1	1	2	3	3	2	5	4	4	5	2	4	1	3	4	5	3	4	3	4	3	1	4	4	4	4	1	5	2	2	5	2	4	3	1	5	4	2	4	4	3	5	5	3	3
2	1955	59	3	1	1	2		2	4	3	4	4	3	4	3	4	2	2	2	5	3	4	2	4	4	3	4	5	3	4	1	3	4	5	4	2	3	2	1	4	5	4	4	1	5	5	2	4	1
1	1959	55	2	1	1	2		3	3	4	4	4	5	5	5	2	4	1	4	4	2	2	1	4	3	3	3	2	4	5	1	4	2	3	3	4	3	3	3	3	5	5	4	3	3	4	4	4	4
2	1955	59	3	2	1	1		2	4	5	4	4	5	5	3	3	2	4	3	5	2	3	2	4	4	3	3	4	4	5	2	3	4	5	4	2	4	2	1	4	4	3	4	2	3	5	4	2	3
2	1959	55	2	1	1	2		2	3	4	3	3	2	3	4	3	3	3	3	4	2	3	3	4	3	4	4	3	3	4	2	4	4	4	4	2	4	4	4	4	3	3	4	3	5	5	4	4	3
2	1950	64	3	1	3	4	1	3	3	4	4	4	4	4	4	3	3	4	4	5	2	2	3	3	4	2	4	3	4	4	1	4	2	4	4	3	3	3	2	4	3	4	4	4	3	4	4	4	3
2	1950	64	3	1	1	2		2	2	5	4	4	4	5	4	2	4	2	4	5	4	4	4	4	5	1	4	5	4	4	1	4	4	2	4	3	2	2	4	5	5	4	4	2	2	4	5	4	1
2	1958	56	3	1	1	2		2	4	5	2	3	5	4	5	4	2	4	4	5	2	4	3	4	4	3	4	2	4	5	1	4	5	4	4	4	4	3	2	4	4	4	4	2	5	4	4	1	3
2	1993	21	1	2	2	4	1	2	5	4	5	4	4	4	4	5	1	2	3	5	3	2	3	5	5	4	4	3	4	4	2	4	1	4	4	1	4	4	1	4	4	4	4	4	5	5	4	5	3
1	1944	70	3	1	1	2		3	2	5	5	4	5	4	4	2	2	3	3	5	2	4	2	4	4	2	4	5	4	4	1	3	4	5	5	4	1	3	2	4	5	4	4	2	2	5	4	4	4
2	1949	65	3	2	2	2		3	3	4	5	4	4	5	4	2	2	2	4	5	5	4	1	4	5	2	5	4	5	5	1	3	3	5	5	3	2	3	3	5	3	5	4	4	2	5	5	5	3
2	1952	62	3	1	2	2		3	1	5	5	5	5	5	5	2	4	3	2	5	2	4	1	2	4	2	2	4	3	5	1	4	4	4	5	4	2	2	4	4	5	2	4	3	3	5	4	4	4
2	1991	23	1	1	2	4	1	3	4	4	4	3	3	4	3	5	3	4	3	5	2	4	4	4	2	5	4	3	4	4	2	3	4	4	3	3	5	3	4	4	3	3	4	3	4	5	4	4	4
2	1951	63	3	2	1	4		4	2	1	4	4	4	4	4	2	4	2	4	4	2	3	4	4	4	2	4	3	5	5	1	5	4	4	3	5	4	5	4	4	4	4	4	3	2	5	4	5	5
2	1990	24	1	2	1	2	1	4	2	4	4	4	4	5	4	4	3	2	2	5	4	5	3	3	1	2	4	1	5	4	1	5	4	3	1	1	2	4	1	3	5	5	4	4	4	5	3	3	1
1	1943	71	3	2	1	4		3	2	5	4	5	5	5	5	1	1	4	5	5	5	5	2	4	5	1	3	5	5	5	1	3	2	4	5	4	1	3	3	3	4	4	4	4	1	5	3	4	1
2	1941	73	3	2	1	4		4	2	4	4	4	4	5	4	5	4	1	4	5	2	5	1	5	2	2	5	5	4	5	1	5	2	2	4	5	1	5	1	4	4	4	4	4	4	3	2	5	2
1	1946	68	3	1	1	1		2	2	5	5	5	5	5	5	2	1	3	4	4	2	2	2	4	4	1	4	5	4	5	1	3	4	4	4	2	2	3	4	5	4	4	4	3	3	5	5	4	2
2	1952	62	3	1	1	2		3	4	4	4	5	3	4	4	3	2	5	4	5	2	2	2	2	4	4	5	4	5	5	1	3	3	5	5	4	4	4	3	5	5	3	4	3	4	5	5	3	1
2	1960	54	2	1	1	2	2	3	2	5	5	4	5	5	5	2	2	4	4	5	3	2	2	4	5	2	4	3	5	5	1	3	4	4	4	3	2	2	4	5	5	4	4	3	4	5	1	4	3
2	1988	26	1	1	1	1	2	4	2	4	4	5	4	5	4	2	3	3	3	5	4	4	1	5	5	1	4	4	3	4	1	4	5	3	5	3	2	4	3	5	5	4	4	4	2	4	4	5	4
2	1956	58	3	1	1	2		2	3	4	4	4	4	5	4	4	2	2	3	4	3	3	3	4	4	4	5	4	4	4	1	4	5	5	4	3	3	4	4	5	5	4	4	4	4	5	5	5	3
1	1949	65	3	1	2	2		4	2	5	5	5	5	5	5	2	2	4	5	2	2	4	2	5	5	1	4	2	5	4	1	3	5	2	5	4	2	4	5	4	4	5	4	5	2	5	2	4	5
2	1989	25	1	1	1	2	2	4	4	2	4	3	3	5	5	4	2	4	4	5	2	5	5	3	5	4	5	2	4	5	2	3	4	3	3	2	2	5	3	5	4	4	4	4	3	5	5	4	3
2	1989	25	1	1	2	1	1	4	4	2	4	3	3	5	5	4	2	4	4	5	2	5	5	3	5	4	5	2	4	5	2	3	4	3	3	2	2	5	3	5	4	4	4	4	3	5	5	4	3
2	1970	44	2	1	2	1	1	2	2	4	4	5	4	5	5	1	3	3	5	5	2	5	3	5	5	1	2	5	5	5	1	5	1	4	4	5	1	5	2	5	4	5	4	4	3	5	5	5	5
2	1972	42	2	1	1	1	3	2	5	2	5	5	5	5	4	5	2	4	4	5	2	2	3	4	5	4	5	4	5	5	2	4	5	4	5	2	4	4	4	4	4	5	4	4	2	5	4	4	2
2	1971	43	2	1	1	1	1	1	2	5	5	5	5	5	5	1	4	3	4	3	3	4	1	5	5	1	3	5	4	5	1	5	3	4	4	4	2	2	5	4	4	5	4	4	2	2	3	5	4
2	1995	19	1	2	2	2	1	4	2	3	5	3	2	3	3	1	2	2	3	5	2	1	3	4	2	4	3	3	4	3	1	2	3	3	4	1	5	2	2	4	3	3	4	2	3	4	4	4	2
1	1945	69	3	1	1	2		3	3	3	4	3	5	4	3	3	4	2	3	4	2	2	3	3	3	3	2	3	3	3	3	3	2	2	3	1	4	4	1	3	2	3	4	2	4	4	4	4	1
2	1989	25	1	1	1	2	2	4	2	4	4	5	4	4	4	1	1	3	4	5	2	1	4	5	3	2	2	4	1	5	2	1	2	3	3	2	4	2	2	4	5	3	4	2	2	2	3	3	3
2	1989	25	1	1	2	1	1	4	2	4	4	5	4	4	4	1	1	3	4	5	2	1	4	5	3	2	2	4	1	5	2	1	2	3	3	2	4	2	2	4	5	3	4	2	2	2	3	3	3
2	1986	28	1	1	2	2	2	3	1	4	4	4	5	4	5	2	4	2	4	5	3	4	1	4	3	1	5	3	4	4	1	1	3	3	3	3	2	2	2	4	4	3	4	3	2	4	4	4	2
2	1986	28	1	2	2	1	1	3	1	4	4	4	5	4	5	2	4	2	4	5	3	4	1	4	3	1	5	3	4	4	1	1	3	3	3	3	2	2	2	4	4	3	4	3	2	4	4	4	2
1	1958	56	3	1	1	3	2	2	4	4	3	5	2	4	5	4	1	3	2	5	1	1	5	1	2	5	4	2	2	5	1	2	2	5	4	1	5	1	1	2	3	3	4	5	3	5	2	5	1
1	1991	23	1	1	1	2		1	4	4	1	2	2	4	4	5	2	2	2	5	2	4	4	3	2	5	2	4	4	3	1	2	2	3	2	2	5	3	1	4	4	3	4	4	1	2	4	3	4
1	1939	75	3	1	1	4		2	3	4	4	3	4	4	4	1	1	3	3	5	3	3	1	4	5	3	4	5	1	4	1	3	4	3	4	3	3	3	1	3	4	3	4	2	2	4	3	4	1
2	1955	59	3	2	1	1		4	2	2	4	3	4	4	4	2	2	2	2	5	2	4	2	4	4	2	3	4	4	4	1	4	2	4	4	2	3	4	2	4	4	4	4	2	2	4	4	3	1
2	1946	68	3	1	1	3		2	2	3	3	3	3	4	3	4	2	2	4	4	3	4	4	3	4	2	3	3	2	3	2	3	3	3	3	3	4	3	4	3	3	3	4	2	2	4	4	4	3
2	1981	33	2	1	2	1	1	2	4	2	4	4	4	4	3	4	2	4	3	4	2	2	3	3	4	4	3	3	4	3	1	3	3	3	4	2	4	3	3	3	4	4	4	4	3	4	4	4	3
2	1996	18	1	2	1	4	2	4	2	3	5	3	2	5	4	4	2	3	3	4	2	1	1	4	4	4	5	1	3	4	1	4	4	3	3	2	4	3	2	4	3	3	4	5	2	3	4	3	4
2	1996	18	1	1	4	1	1	4	2	3	5	3	2	5	4	4	2	3	3	4	2	1	1	4	4	4	5	1	3	4	1	4	4	3	3	2	4	3	2	4	3	3	4	5	2	3	4	3	4
2	1989	25	1	2	2	3	1	1	5	3	4	3	4	2	5	5	4	4	1	1	2	4	5	4	4	5	4	1	4	4	1	1	2	4	4	1	1	5	1	3	2	4	4	3	5	4	4	5	5
2	1970	44	2	1	1	4	1	3	4	3	3	4	3	4	5	4	4	2	3	5	2	4	3	2	3	5	3	3	3	4	2	3	3	2	3	1	5	4	2	5	2	3	4	2	4	3	2	4	1
1	1967	47	2	1	2	3	1	4	2	2	4	4	5	4	5	4	2	4	2	5	2	2	2	4	4	2	4	2	4	4	1	1	4	4	4	2	3	3	4	4	4	4	4	4	2	4	2	3	2
2	1986	28	1	2	2	2	2	2	3	3	2	4	4	5	3	3	2	3	3	5	1	2	3	3	2	3	5	5	3	3	1	3	2	3	2	1	5	5	5	2	2	2	4	3	2	4	2	3	2
2	1986	28	1	2	2	1	1	2	3	3	2	4	4	5	3	3	2	3	3	5	1	2	3	3	2	3	5	5	3	3	1	3	2	3	2	1	5	5	5	2	2	2	4	3	2	4	2	3	2
1	1949	65	3	1	2	2		2	2	5	4	4	3	5	5	4	2	3	3	5	2	2	3	4	4	3	3	4	3	4	1	3	2	4	4	2	3	5	2	5	4	3	4	3	2	3	4	4	3
2	1980	34	2	1	1	2	2	2	2	4	4	4	3	4	4	4	2	3	4	4	2	4	2	3	4	4	3	3	4	4	1	4	2	4	4	2	4	4	4	4	4	3	4	3	2	2	4	3	2
2	1980	34	2	1	2	2	2	2	2	4	4	4	3	4	4	4	2	3	4	4	2	4	2	3	4	4	3	3	4	4	1	4	2	4	4	2	4	4	4	4	4	3	4	3	2	2	4	3	2
1	1943	71	3	2	2	4		4	3	3	4	4	3	4	5	2	4	2	4	4	2	3	3	4	4	2	3	4	4	4	1	3	3	2	4	4	3	3	2	3	3	4	4	3	3	3	4	4	2
2	1952	62	3	1	2	3		4	2	1	4	4	3	4	4	3	3	3	4	5	2	4	2	4	2	3	4	4	5	3	1	2	5	4	4	3	4	4	3	4	2	4	4	3	2	4	4	4	2
2	1953	61	3	2	1	2		4	2	5	4	4	4	3	2	1	1	3	3	5	4	5	4	4	4	1	2	3	5	4	1	3	2	5	5	2	1	2	3	5	4	2	4	2	1	5	5	5	2
2	1954	60	3	1	1	2		3	2	4	3	4	5	4	4	2	1	4	3	5	4	3	3	4	4	3	3	3	3	4	1	3	3	4	3	2	4	3	2	4	5	3	4	3	3	4	3	4	2
1	1933	81	3	1	1	2		4	2	2	5	4	4	5	5	3	2	2	3	3	2	2	3	4	4	1	3	3	3	4	1	4	4	4	4	1	3	4	2	3	5	4	4	4	2	5	3	4	1
1	1941	73	3	1	1	2		4	4	4	4	4	4	5	4	3	4	2	4	4	2	4	3	4	4	2	3	3	5	4	1	4	3	4	4	3	2	3	1	3	3	4	4	4	3	4	2	3	3
2	1950	64	3	2	1	3		3	4	3	4	3	4	4	3	5	4	4	3	4	1	3	5	2	3	4	5	3	2	3	2	3	5	4	4	2	4	4	2	4	3	4	4	2	4	5	2	3	2
2	1993	21	1	2	1	2	1	1	4	3	4	2	1	4	3	5	3	5	2	4	2	4	4	2	3	5	5	2	3	2	2	4	5	4	4	2	4	5	3	5	3	3	4	3	5	4	5	4	3
2	1988	26	1	2	1	2	1	3	2	3	4	5	5	5	3	4	1	4	3	5	1	3	2	5	3	3	4	1	4	3	3	4	2	5	3	2	4	4	3	4	5	4	4	4	2	5	4	4	2
2	1942	72	3	1	1	2		4	3	4	4	4	4	4	4	3	2	3	3	4	3	2	2	2	4	2	4	4	4	4	2	4	4	3	4	3	3	2	2	4	4	4	4	3	3	4	4	4	3
1	1940	74	3	1	1	3		2	2	4	4	3	4	3	3	3	2	2	3	5	2	2	4	4	3	3	2	4	3	4	2	3	3	5	5	3	4	3	4	5	4	3	4	1	2	5	3	3	1
1	1950	64	3	1	2	1		3	2	5	4	4	5	4	4	4	2	3	3	4	2	3	2	4	4	2	3	3	4	4	1	3	3	4	4	2	2	3	4	4	4	4	4	4	3	4	4	3	1
2	1989	25	1	1	1	1	1	3	2	4	4	5	5	5	5	1	2	3	4	5	2	2	2	5	4	2	4	4	5	5	1	3	3	4	4	3	2	2	2	4	5	5	4	4	3	5	4	4	2
2	1951	63	3	2	2	3		2	4	2	4	4	4	4	3	4	3	3	3	5	2	4	4	3	4	2	4	4	4	2	1	4	4	4	4	2	2	4	5	5	5	4	4	3	4	5	4	3	1
2	1968	46	2	1	1	3	1	2	2	4	4	4	4	5	5	4	3	3	4	5	2	2	2	4	1	5	4	2	5	5	1	4	4	4	4	3	5	4	4	4	4	4	4	4	4	4	2	4	2
2	1955	59	3	2	1	3		4	4	2	4	2	2	4	4	5	3	4	4	4	2	4	5	3	4	4	5	3	3	4	1	4	5	3	4	3	4	4	5	3	4	3	4	2	5	4	3	4	4
2	1953	61	3	1	1	4		3	2	2	5	4	3	5	5	4	2	4	3	5	2	3	2	4	4	3	5	3	5	4	1	4	4	4	4	3	2	5	2	5	2	3	4	4	2	5	3	4	2
2	1963	51	2	2	2	3	2	3	2	5	4	5	5	5	4	2	1	5	3	4	3	4	2	5	5	1	3	3	5	5	1	3	2	5	5	3	3	3	3	5	5	3	4	3	2	5	4	4	3
2	1963	51	2	2	3	2	2	3	2	5	4	5	5	5	4	2	1	5	3	4	3	4	2	5	5	1	3	3	5	5	1	3	2	5	5	3	3	3	3	5	5	3	4	3	2	5	4	4	3
2				1	1	3		4	3	3	3	4	4	5	4	3	2	3	3	4	2	4	1	3	3	3	3	3	4	4	1	4	3	4	4	2	4	2	4	5	4	4	4	1	2	5	5	3	4
2	1956	58	3	2	1	3		4	1	4	5	5	5	5	5	1	1	3	5	5	1	5	1	5	5	1	5	3	5	5	1	5	1	3	2	3	1	5	1	5	1	5	4	4	1	5	5	5	5
1	1984	30	1	1	1	1	1	4	2	4	4	4	5	5	3	2	1	4	3	5	3	5	2	3	5	2	4	4	2	4	1	4	4	4	4	4	2	4	2	5	4	4	4	4	3	5	4	4	4
2	1995	19	1	2	1	2	1	2	4	3	4	5	2	4	5	5	3	5	3	5	2	1	4	4	2	5	4	1	4	3	2	4	5	3	2	1	5	4	4	5	4	4	4	5	4	5	4	4	1
2	1951	63	3		1	2		2	2	4	4	4	4	4	4	2	2	3	3	4	2	3	2	4	4	3	2	3	3	4	2	5	2	4	4	4	4	4	3	4	4	4	4	3	3	4	4	4	2
2	1945	69	3	2	1	2		3	3	4	4	3	5	5	5	5	3	3	3	5	2	5	1	3	4	3	3	5	4	4	1	4	4	3	5	3	4	3	2	5	3	4	4	3	3	3	4	4	2
1	1939	75	3	2	1	1		3	2	5	5	4	5	4	5	2	2	3	4	4	2	3	1	4	4	1	4	4	4	4	1	3	2	3	4	4	2	3	4	5	4	4	4	3	2	5	4	4	3
2	1947	67	3	1	1	4		3	4	2	4	5	3	4	5	5	2	3	3	5	3	3	3	4	4	1	3	1	5	5	1	4	4	5	4	3	2	3	4	3	3	4	4	3	5	5	4	3	2
2	1989	25	1	1	2	1	2	2	5	4	4	4	4	4	4	5	2	4	3	4	2	4	4	2	3	3	5	4	4	4	2	3	5	4	4	3	3	3	2	2	3	4	4	5	4	2	2	4	3
2	1989	25	1	2	1	1	1	2	5	4	4	4	4	4	4	5	2	4	3	4	2	4	4	2	3	3	5	4	4	4	2	3	5	4	4	3	3	3	2	2	3	4	4	5	4	2	2	4	3
2	1949	65	3	2	1	2		3	2	5	4	4	5	5	5	4	2	3	5	5	1	2	3	5	4	2	5	4	4	5	1	5	3	4	4	5	4	3	4	5	4	4	4	3	3	3	4	5	5
2	1956	58	3	1	2	3	1	2	5	4	4	5	4	3	4	4		2	2	5	4	4	4	4	3	5	4	5	3		1	1	2	4	5	1	5	3	2	3	5	3	4	2	4	4	2	3	1
2	1979	35	2	1	1	1	1	3	4	3	2	3	3	4	3	4	3	3	3	4	2	4	4	4	3	4	4	4	2	4	1	4	5	4	2	2	4	4	2	2	3	4	4	4	4	4	4	4	3
2	1955	59	3	1	1	4		2	4	3	4	2	4	2	4	2	4	2	4	4	2	5	2	4	2	2	4	2	3	2	1	2	4	2	4	2	4	4	4	2	4	2	4	2	4	4	4	4	1
2	1951	63	3	1	1	4		1	2	4	3	3	3	3	2	4	2	3	3	5	4	3	3	4	4	1	5	3	4	3	1	3	4	3	4	3	3	4	2	3	4	3	4	1	4	2	3	3	3
2	1996	18	1	2	1	2	2	3	5	5	5	3	1	5	3	5	3	3	3	4	1	1	4	4	3	5	4	1	2	4	2	3	3	3	4	2	5	3	3	4	4	3	4	3	4	4	4	3	2
2	1958	56	3	1	1	2		2	1	4	3	3	4	5	4	3	1	2	3	5	2	4	3	3	4	2	3	4	3	4	1	3	4	4	3	2	2	3	3	4	4	4	4	3	4	4	4	4	1
2	1993	21	1	1	1	2	1	2	4	2	4	4	2	4	3	4	2	4	1	5	2	3	4	3	2	2	4	3	3	3	1	1	4	4	2	1	4	4	2	5	3	4	4	3	5	5	5	4	1
2	1954	60	3	2	1	2		3	4	4	4	4	4	3	4	4	3	4	3	5	2	2	3	4	4	3	4	4	3	4	1	3	4	4	3	2	4	3	3	4	4	2	4	2	3	4	4	5	1
2	1996	18	1	2	2	2	1	2	5	3	5	4	2	4	4	5	5	2	2	4	1	2	5	4	3	5	5	1	4	3	2	3	4	4	4	1	5	2	1	4	4	3	4	2	1	5	4	3	1
1	1947	67	3	1	2	4		4	2	4	4	3	5	4	5	4	2	2	4	4	3	4	1	4	4	2	3	5	4	4	1	3	2	3	3	5	2	4	3	4	4	3	4	3	3	3	3	4	3
2	1956	58	3	1	1	2		4	2	4	5	4	3	4	4	3	2	4	3	4	4	4	2	3	4	4	4	3	4	4	1	3	4	2	4	3	4	3	3	3	4	4	4	2	2	5	4	4	2
2	1958	56	3	1	2	4		4	4	3	4	3	4	4	4	4	2	2	3	4	3	4	2	4	4	3	3	3	4	4	1	3	3	4	4	2	4	4	2	4	4	3	4	2	4	4	4	4	2
2	1947	67	3	1	1	1		4	2	4	4	4	3	4	4	2	4	2	3	5	1	2	2	3	3	3	3	4	4	4	1	5	2	4	4	3	4	4	1	2	5	3	4	4	2	4	3	3	2
2	1982	32	2	2	1	2	2	3	3	4	2	5	5	1	5	1	2	3	3	5	3	2	1	3	4	2	3	3	3	5	1	3	4	4	3	2	3	2	3	3	5	4	4	3	3	3	3	4	2
1	1941	73	3	2	2	4		3	3	4	4	3	4	5	4	2	3	3	4	5	2	4	3	3	4	1	3	5	5	5	1	4	4	4	5	3	2	4	2	5	5	4	4	3	3	4	4	3	1
2	1945	69	3	2	1	2		2	2	4	4	3	5	4	4	2	4	2	3	5	3	4	3	4	5	2	4	3	3	5	1	3	5	4	5	3	3	3	1	4	3	4	4	3	4	4	4	4	1
2	1952	62	3	2	1	2		2	5	5	3	4	2	3	5	5	3	3	1	5	2	4	4	2	3	4	4	2	3	3	1	3	2	3	3	2	5	5	3	2	3	3	4	1	5	5	5	3	2
1	1937	77	3	1	1	2		2	2	4	4	4	5	4	4	3	2	2	4	4	2	2	1	4	2	4	4	5	2	4	1	3	4	2	4	1	3	2	5	5	3	4	4	3	2	2	2	2	2
2	1954	60	3	2	2	2		3	2	4	4	4	4	4	4	2	2	4	3	5	2	2	4	5	4	2	2	5	3	4	1	4	4	4	4	3	4	3	2	4	5	4	4	2	4	5	4	4	3
1	1947	67	3	1	1	2		2	1	5	4	4	5	5	4	1	2	4	4	5	3	4	2	5	5	1	4	5	1	5	1	4	4	4	4	3	1	3	3	5	4	4	4	3	2	4	4	4	1
2	1942	72	3	2	2	3		3	2	4	4	4	4	5	4	1	2	4	4	5	3	4	3	4	3	1	3	5	4	5	1	5	3	4	5	5	2	3	2	5	3	4	4	3	2	5	5	3	3
2	1960	54	2	1	1	4		2	3	4	5	4	2	4	5	4	3	3	3	5	2	3	5	2	4	5	4	3	5	4	1	3	2	4	5	4	5	4	1	4	2	3	4	3	4	4	4	4	3
2	1985	29	1	2	1	1	2	4	3	2	4	4	3	4	4	4	2	2	4	5	1	3	2	4	5	2	2	1	4	5	1	3	4	1	3	1	3	2	2	5	5	5	4	5	4	4	2	5	1
2	1975	39	2	1	1	1	2	4	2	3	5	4	4	4	4	2	2	4	4	4	2	4	2	3	4	4	4	2	3	5	1	3	3	3	4	2	4	4	2	4	4	5	4	4	3	4	4	4	2
2	1975	39	2	1	1	3	3	4	2	3	5	4	4	4	4	2	2	4	4	4	2	4	2	3	4	4	4	2	3	5	1	3	3	3	4	2	4	4	2	4	4	5	4	4	3	4	4	4	2
2	1950	64	3	2	2	3		4	2	3	5	5	4	5	5	1	4	4	4	5	1	2	1	3	4	2	5	5	5	4	1	3	3	2	3	5	4	4	3	5	3	4	4	5	1	1	4	5	4
2	1981	33	2	2	1	1	2	3	2	4	4	4	4	4	4	2	4	3	3	5	4	5	2	5	4	2	5	4	5	4	1	4	4	4	2	2	2	4	2	4	4	4	4	4	4	5	4	4	1
2	1981	33	2	1	1	2	2	3	2	4	4	4	4	4	4	2	4	3	3	5	4	5	2	5	4	2	5	4	5	4	1	4	4	4	2	2	2	4	2	4	4	4	4	4	4	5	4	4	1
2	1960	54	2		1	2		1	2	5	3	4	3	4	4	3	5	3	4	5	1	1	3	5	5	4	5	3	4	5	1	3	2	3	4	3	4	3	2	5	3	4	4	3	2	5	5	4	1
2	1990	24	1	1	1	2	1	1	4	4	3	5	4	5	4	4	2	3	2	5	3	2	4	4	4	4	3	3	4	5	1	1	3	4	3	2	5	5	2	4	4	4	4	3	5	4	4	3	2
2	1940	74	3	1	1	4		2	2	5	5	4	3	5	4	2	2	2	5	4	2	3	2	3	4	2	3	4	5	5	1	5	2	3	4	4	2	2	5	5	3	4	4	4	2	5	2	4	5
2	1952	62	3	1	2	2		4	1	4	4	4	5	5	4	2	3	2	4	5	4	3	2	5	5	2	3	5	5	5	1	3	3	5	4	5	3	2	3	5	5	4	4	4	3	5	5	5	3
2					1	3		5	2	5	5	4	5	5	4	4	3	3	5	3	4	4	4	1	4	1	5	5	5	5	2	5	2	2	5	2	1	2	5	5	5	4	4	4	3	4	1	3	2
1	1953	61	3	1	1	4		2	2	5	4	3	4	3	4	2	3	3	4	5	3	4	4	4	4	1	4	5	3	3	1	3	4	4	5	2	2	3	5	5	4	3	4	3	3	5	1	4	4
2	1993	21	1	2	1	2	3	2	4	4	5	4	4	4	4	3	2	4	4	5	2	4	2	4	4	3	4	4	4	4	1	2	3	3	4	2	4	4	3	4	4	4	4	4	2	5	4	3	2
2	1971	43	2	1	1	1	1	3	4	4	5	3	4	5	4	3	2	3	3	5	1	5	2	4	5	1	4	5	2	5	1	3	4	4	5	3	3	4	4	4	4	5	4	4	5	4	2	4	3
2	1946	68	3	2	1	2		1	2	4	5	5	5	4	5	1	2	4	4	5	3	4	3	4	4	1	2	4	5	4	1	3	4	4	5	3	1	2	2	5	3	5	4	3	2	5	2	4	2
2	1948	66	3	1	2	3		2	2	2	4	4	5	5	5	5	1	2	3	4	1	4	3	5	4	2	4	4	5	4	1	5	1	2	3	4	2	5	3	2	3	4	4	4	2	5	4	4	3
2	1951	63	3	1	1	2		2	2	4	4	4	5	5	5	4	2	3	4	5	3	4	3	4	4	1	3	3	3	4	1	4	2	4	4	5	2	3	3	4	5	5	4	4	4	5	5	5	4
2	1950	64	3	2	2	2		2	2	3	4	4	3	5	4	2	4	3	4	5	4	5	2	4	4	1	4	3	4	4	1	4	4	4	4	3	2	4	4	5	5	3	4	2	2	5	4	5	3
2	1955	59	3	2	1	2		4	4	4	4	4	2	4	4	4	2	3	4	5	1	2	4	4	5	2	5	5	4	5	3	2	4	5	5	5	5	5	4	5	4	4	4	3	2	5	5	4	1
2	1972	42	2	2	1	2	1	2	2	2	5	3	1	5	4	5	3	2	2	5	2	2	3	2	1	4	3	4	3	4	1	5	2	5	3	4	5	4	5	5	3	4	4	2	4	5	5	3	2
2	1993	21	1	1	1	4	1	4	3	5	4	4	5	4	5	3	2	4	4	5	1	3	2	2	4	2	2	4	5	5	1	4	3	4	4	4	3	4	3	5	5	5	4	4	3	5	4	4	4
1	1960	54	2	1	2	1	1	2	4	2	4	4	4	4	4	3	3	3	3	4	4	3	2	3	4	4	4	4	4	4	1	4	2	3	3	3	4	3		2	3	3	4	4	2	5	3	3	2
2	1945	69	3	1	1	1	1	3	3	3	4	4	2	4	4		2	4	3	5	2	4	2	4	4	4	3	4	4	3	1	4	4	4	3	2	4	2	2	4	4	3	4	2	4	5	5	4	2
2	1955	59	3	1	2	3		2	4	2	4	4	4	4	4	4	2	2	2	4	4	2	4	2	4	2	4	4	3	3	1	2	3	4	4	2	4	2	1	4	4	3	4	3	4	4	4	4	3
2	1954	60	3	1	1	2		2	4	2	5	4	1	4	5	4	1	3	2	5	2	1	2	3	3	3	2	4	5	3	2	2	2	3	4	2	5	3	1	4	3	2	4	3	4	3	3	4	1
1	1983	31	2	1	1	2	2	4	4	2	3	4	4	4	3	4	1	3	2	5	2	3	2	2	3	2	4	2	5	5	1	4	4	4	3	2	3	4	2	2	4	3	4	3	2	3	4	4	2
1	1970	44	2	1	1	2		2	4	3	4	5	4	4	1	5	2	1	2	4	1	1	3	3	3	4	4	3	5	5	1	4	2	2	2	3	5	3	1	3	5	4	4	2	2	3	4	4	3
1	1960	54	2	1	1	2	1	2	4	2	4	4	4	4	4	3	3	3	3	4	4	3	2	3	4	4	4	4	4	4	1	4	2	3	3	3	4	3	3	2	3	3	4	4	2	5	3	3	2
2	1977	37	2	1	1	2	1	2	4	3	2	3	4	4	5	3	2	3	4	5	3	3	2	4	3	2	3	4	4	3	1	4	2	4	2	2	2	2	2	2	4	4	4	4	4	5	3	3	3
2	1945	69	3	1	1	1	2	3	3	3	4	4	2	4	4	3	2	4	3	5	2	4	2	4	4	4	3	4	4	3	1	4	4	4	3	2	4	2	2	4	4	3	4	2	4	5	5	4	2
2	1983	31	2	1	2	1	1	2	2	4	3	3	5	4	5	3	4	1	3	5	1	4	1	3	4	2	4	5	3	5	1	4	4	3	2	2	2	2	1	4	4	3	4	2	3	5	3	4	2
1	1955	59	3	1	1	1		4	2	2	4	4	3	5	5	3	2	3	4	4	2	2	2	4	3	4	4	3	5	4	1	4	2	4	4	3	4	4	2	4	4	4	4	3	3	4	4	4	1
2	1948	66	3	2	2	4		3	2	3	4	4	3	4	5	3	4	3	3	5	2	2	2	3	4	2	3	5	5	5	1	3	3	4	5	3	2	3	2	3	3	3	4	3	3	5	4	3	1
2	1946	68	3	2	1	2		3	4	2	4	4	3	4	4	4	2	3	4	5	3	2	4	4	4	3	4	4	2	4	1	4	4	4	5	2	4	4	5	5	2	4	4	3	3	5	4	2	4
2	1951	63	3	2	1	2		3	4	4	4	3	3	4	4	4	2	3	4	4	2	2	3	4	4	2	4	4	4	3	1	2	4	4	3	3	3	4	4	3	3	3	4	2	2	4	5	4	3
1	1945	69	3	1	2	4		2	3	5	4	3	4	4	4	2	2	2	3	5	2	3	2	4	4	2	4	4	4	4	1	3	4	3	3	3	3	3	3	3	4	4	4	3	2	4	3	3	1
2	1985	29	1	1	1	1	2	3	1	5	3	5	4	4	5	2	3	2	3	4	2	3	3	3	5	2	3	3	4	4	1	4	2	4	3	2	3	3	2	4	5	3	4	3	1	5	3	4	3
1	1931	83	3	2	1	2		2	2	3	4	3	4	4	4	3	4	2	4	5	2	1	5	2	2	2	4	3	4	4	1	5	2	2	5	4	4	4	3	5	1	4	4	2	3	4	2	3	5
1	1970	44	2	1	1	1	2	2	2	4	4	2	4	5	5	3	2	3	4	4	3	4	1	4	3	2	4	3	4	3	1	3	2	3	3	4	3	3	3	3	4	3	4	3	3	4	4	3	3
2	1982	32	2	1	1	2	2	2	2	5	5	4	5	4	4	2	2	3	3	5	2	4	2	4	5	3	4	3	3	5	1	2	4	4	5	2	3	4	2	3	4	2	4	3	2	5	4	4	2
2	1982	32	2	1	2	1	1	2	2	5	5	4	5	4	4	2	2	3	3	5	2	4	2	4	5	3	4	3	3	5	1	2	4	4	5	2	3	4	2	3	4	2	4	3	2	5	4	4	2
1	1954	60	3	1	1	3		3	4	3	4	2	3	4	2	3	2	1	3	5	2	5	4	4	5	1	3	5	3	4	3	4	4	4	5	1	3	3	2	5	4	3	4	1	3	5	4	3	4
1	1944	70	3	1	2	4		1	4	3	4	4	5	4	5	3	1	3	4	2	2	2	3	3	4	2	3	2	5	5	3	3	4	4	5	3	4	3	1	4	4	4	4	4	2	5	5	4	3
2	1980	34	2	2	2	1	1	2	5	4	4	3	3	4	4	4	2	4	3	5	1	3	3	3	4	4	4	3	4	4	1	3	3	4	4	3	4	4	2	4	4	4	4	3	3	5	4	4	2
2	1973	41	2	1	1	2	1	4	2	4	4	4	4	5	5	2	3	3	3	5	2	4	3	4	4	2	4	4	2	4	1	4	4	4	4	2	3	3	2	5	4	3	4	4	4	4	4	4	1
1	1944	70	3	1	2	2		4	2	4	4	4	5	4	5	2	3	4	4	5	5	3	1	5	4	1	3	4	4	4	1	3	3	4	5	4	1	2	1	5	4	4	4	4	4	4	4	4	4
2	1951	63	3	1	1	4		2	3	3	4	3	2	4	4	3	2	3	4	5	3	4	2	4	4	2	3	3	5	5	2	3	3	3	3	5	3	4	1	5	3	4	4	2	3	5	5	5	3
1	1945	69	3	1	2	4		2	4	2	4	2	4	4	4	4	2	2	4	4	2	2	2	4	4	2	4	2	4	4	1	3	4	4	4	2	4	4	2	4	2	3	4	4	2	4	2	4	3
2	1949	65	3	1	3	4		3	2	4	4	4	3	4	5	2	2	4	3	5	2	2	4	2	4	1	5	4	5	4	1	3	3	4	4	4	2	4	3	5	2	4	4	3	3	4	4	3	3
2	1967	47	2	1	1	1	1	1	3	5	3	3	5	3	3	1	1	3	3	5	1	4	3	5	3	1	3	3	5	5	1	3	3	5	5	3	1	1	5	5	5	3	4	3	3	5	3	3	3
2				1	1	1	2	3	2	5	5	4	5	5	4	1	1	3	3	5	3	5	1	5	5	1	2	5	2	4	1	3	2	3	4	4	3	1	3	5	4	4	4	2	3	5	4	3	1
2				1	1	1	1	3	2	5	5	4	5	5	4	1	1	3	3	5	3	5	1	5	5	1	2	5	2	4	1	3	2	3	4	4	3	1	3	5	4	4	4	2	3	5	4	3	1
2	1947	67	3	2	1	2		2	2	4	4	4	4	5	5	2	1	3	4	5	1	2	2	4	4	2	3	2	4	5	1	3	4	4	4	4	2	2	3	5	4	4	4	3	2	4	4	4	1
2	1988	26	1	1	2	1	2	2	5	5	2	4	5	4	2	1	2	4	4	5	2	4	2	4	4	4	4	2	2	5	1	2	5	4	4	2	4	3	2	5	2	4	4	4	5	5	4	4	1
2	1988	26	1	2	1	1	1	2	5	5	2	4	5	4	2	1	2	4	4	5	2	4	2	4	4	4	4	2	2	5	1	2	5	4	4	2	4	3	2	5	2	4	4	4	5	5	4	4	1
2	1959	55	2	1	2	2		2	3	4	5	4	4	4	4	4	2	3	2	5	2	2	4	3	4	4	4	3	3	4	1	4	4	4	4	1	4	3	4	4	4	3	4	3	2	4	4	4	1
2	1995	19	1	1	1	4	2	5	2	5	5	4	5	5	4	5	2	4	3	5	1	4	5	5	5	5	5	2	4	5	1	3	4	5	4	2	5	1	1	5	3	5	4	5	2	4	4	4	1
2	1995	19	1	1	4	1	1	5	2	5	5	4	5	5	4	5	2	4	3	5	1	4	5	5	5	5	5	2	4	5	1	3	4	5	4	2	5	1	1	5	3	5	4	5	2	4	4	4	1
2	1994	20	1	2	1	2	2	4	2	5	4	5	4	4	4	4	2	3	4	5	1	2	2	4	4	3	4	4	4	5	2	4	3	4	4	3	4	4	2	5	4	4	4	5	2	4	4	4	2
2	1959	55	2	1	1	3		2	2	5	5	5	5	5	5	2	4	2	4	5	2	4	4	4	4	2	4	4	4	4	1	4	5	4	4	2	4	4	2	4	4	4	4	2	5	5	4	4	2
2	1992	22	1	1	1	2	1	4	2	3	5	3	4	5	1	5	2	4	3	4	1	2	5	3	4	5	5	2	4	4	1	5	5	5	3	4	5	5	4	4	3	3	4	3	4	5	4	4	4
2	1953	61	3	2	2	3		3	2	4	4	4	5	5	5	2	3	4	5	5	2	3	1	4	5	2	4	4	5	5	1	5	4	4	5	5	3	5	4	5	4	4	4	4	1	4	1	5	3
2	1994	20	1	2	2	2	1	2	2	3	4	5	5	5	4	2	1	3	3	5	2	3	2	4	4	2	4	3	4	4	1	4	4	3	4	4	3	4	3	4	5	4	4	5	3	4	5	4	4
2	1972	42	2	1	1	2	1	2	4	4	4	4	5	4	4	4	2	4	3	5	1	4	1	4	5	2	4	5	4	5	1	5	5	4	5	4	5	5	1	4	4	5	4	3	4	5	2	3	3
2	1994	20	1	2	1	2	2	2	4	4	4	2	5	5	4	4	2	4	4	5	2	4	4	4	4	2	4	1	4	2	1	3	4	4	4	3	3	4	5	4	2	4	4	4	4	5	5	4	2
2	1985	29	1	1	3	1	2	2	4	4	4	4	4	4	4	4	2	2	4	5	1	4	4	2	5	4	4	4	5	5	1	4	5	5	3	4	5	4	4	5	3	4	4	4	4	5	4	4	3
2	1994	20	1	1	2	2	2	2	4	4	4	2	5	5	4	4	2	4	4	5	2	4	4	4	4	2	4	1	4	2	1		4	4	4	3		4	5	4	2	4	4	4	4	5	5	4	2
2	1995	19	1	2	1	2	2	3	2	5	5	5	5	5	4	2	1	3	3	5	2	2	2	5	5	1	3	3	4	5	1	3	3	5	5	3	2	2	2	4	4	5	4	5	2	4	5	4	3
2	1994	20	1	2	1	2	3	2	4	3	5	2	2	4	4	5	2	3	2	5	2	2	3	4	4	2	4	2	3		1	3	4	2	4	2	4	4	4	4	2	3	4	4	4	4	4	4	3
2	1985	29	1	1	1	1	2	2	2	5	4	5	4	5	5	2	1	2	4	5	2	5	2	4	5	1	3	3	5	5	1	4	2	3	4	1	1	5	1	3	5	5	4	5	2	5	5	5	2
2	1962	52	2	1	1	3	1	4	2	5	4	3	5	4	4	4	2	4	4	5	1	1	2	5	4	5	4	3	4	4	2	4	2	2	5	3	5	2	4	5	5	4	4	2	4	4	5	4	3
2	1959	55	2	1	2	1	1	2	4	3	4	4	5	4	4	5	3	4	4	5	2	2	2	4	4	4	4	2	4	4	1	3	5	3	4	4	4	3	3	4	4	4	4	4	4	5	4	3	3
2	1950	64	3	1	1	1	1	3	3	4	4	4	5	3	3	1	1	4	3	5	2	3	2	4	4	1	2	5	4	4	1	2	4	4	5	3	1	2	5	5	4	3	4	2	2	4	4	3	3
2	1989	25	1	2	2	4	1	3	5	2	2	2	2	3	1	5	2	2	2	5	2	4	5	5	2	5	4	2	2	2	1	1	5	3	2	2	5	4	2	2	4	2	4	2	4	5	2	3	1
2	1947	67	3	2	1	3		2	4	2	5	4	1	3	3	5	3	2	3	2	1	2	3	1	4	5	2	1	4	3	1	3	2	2	1	5	5	5	2	3	2	4	4	3	3	4	3	3	3
1	1931	83	3	2	1	1		3	3	5	4	4	5	3	4	2	1	3	4	5	2	3	4	5	4	3	3	4	4	4	1	4	3	5	4	3	4	2	1	3	5	3	4	1	3	5	1	4	1
1	1989	25	1	2	1	1	1	4	2	4	3	3	4	3	4	4	2	5	4	5	2	2	2	4	4	3	3	2	3	2	1	4	4	3	3	4	4	4	2	3	3	4	4	4	4	3	3	3	4
1	1989	25	1	1	1	3	3	4	2	4	3	3	4	3	4	4	2	5	4	5	2	2	2	4	4	3	3	2	3	2	1	4	4	3	3	4	4	4	2	3	3	4	4	4	4	3	3	3	4
2	1980	34	2	1	2	1	1	4	2	4	3	4	4	4	4	3	2	4	4	5	4	4	1	4	3	3	4	3	3	4	1	2	2	4	3	3	2	1	2	4	4	4	4	3	3	4	3	5	2
2	1954	60	3	2	1	2		2	3	4	4	2	4	4	2	3	3	3	3	5	2	4	5	4	3	4	3	4	3	2	2	4	3	4	3	4	3	3	2	4	4	3	4	2	5	5	4	3	3
1	1943	71	3	1	2	4		3	2	4	3	5	5	4	5	2	2	2	4	4	2	1	2	4	4	3	3	2	4	4	1	4	4	4	3	2	3	3	2	2	4	2	4	3	4	3	2	4	3
2	1958	56	3	1	1	2	1	1	2	5	4	4	5	5	5	2	1	4	3	5	3	2	2	5	5	2	2	4	5	5	1	3	3	5	4	3	3	2	4	2	4	4	4	2	3	4	4	4	1
1	1954	60	3	1	1	2		2	2	5	4	4	4	5	4	2	2	2	4	5	3	3	2	3	4	1	2	4	4	5	1	4	4	3	3	3	3	3	3	3	5	4	4	3	3	4	3	4	3
2	1954	60	3	1	2	2		2	3	4	4	3	4	4	4	4	2	3	3	4	2	2	3	4	3	4	4	4	4	3	2	4	3	4	4	3	4	2	4	4	4	4	4	2	4	4	4	3	3
1	1945	69	3	1	3	2		2	2	4	4	3	4	5	4	2	2	3	3	5	3	4	2	4	4	2	3	4	4	4	1	4	3	4	4	3	2	3	3	3	4	3	4	2	3	2	3	3	2
1	1981	33	2	1	2	2	2	3	2	5	5	4	5	4	5	2	2	3	4	4	2	3	2	4	4	2	4	4	4	5	1	4	3	3	4	2	3	4	2	4	4	5	4	3	2	3	3	4	3
2	1959	55	2	1	2	4		4	2	3	4	3	5	5	3	4	4	3	3	5	2	1	3	4	4	4	3	2	4	5	1	3	3	3	5	2	4	3	1	5	3	5	4	1	2	5	5	5	1
1	1986	28	1	2	1	1	1	1	5	4	4	5	2	3	5	5	3	2	3	5	2	5	4	2	4	5	5	1	2	4	1	3	5	4	1	2	5	2	1	3	5	5	4	5	4	4	2	4	5
2	1995	19	1	2	1	2	1	3	5	3	5	3	4	4	4	4	1	3	3	4	2	4	3	3	5	3	3	3	3	4	1	3	3	3	4	3	5	4	3	4	3	3	4	3	5	5	4	4	4
2	1947	67	3	1	1	2		4	1	5	5	4	4	5	4	4	2	4	4	5	2	2	2	5	4	1	4	4	4	4	1	5	1	4	4	4	1	4	2	5	5	4	4	4	1	4	4	4	1
2	1985	29	1	1	1	2	2	3	2	5	4	4	5	5	5	2	2	2	4	5	2	3	2	4	4	2	4	2	4	5	1	4	3	4	4	4	2	4	1	3	4	5	4	5	2	4	4	4	3
2	1985	29	1	1	2	1	1	3	2	5	4	4	5	5	5	2	2	2	4	5	2	3	2	4	4	2	4	2	4	5	1	4	3	4	4	4	2	4	1	3	4	5	4	5	2	4	4	4	3
2	1950	64	3	2	1	1	2	3	3	4	4	4	5	3	3	1	1	4	3	5	2	3	2	4	4	1	2	5	4	4	1	2	4	4	5	3	1	2	5	5	4	3	4	2	2	4	4	3	3
2	1942	72	3	1	1	3		2	3	5	5	4	5	3	3	3	3	3	3	5	3	4	2	3	5	1	5	3	5	5	3	3	5	5	5	1	1	3	5	5	5	3	4	3	3	5	3	4	1
1	1985	29	1	2	1	2	1	2	3	5	4	5	4	5	4	3	2	4	3	4	1	2	1	5	5	2	3	5	5	4	1	5	4	2	4	2	4	2	1	3	5	4	4	4	2	5	3	4	4
2	1992	22	1	1	1	2	1	2	3	4	4	4	4	4	5	4	2	3	3	5	2	4	4	4	4	2	3	2	4	4	1	2	4	4	3	3	4	2	1	3	5	4	4	4	4	4	4	4	2
2	1947	67	3	2	1	4		3	3	3	4	2	4	4	5	5	4	4	4	5	1	4	3	4	2	4	3	3	3	4	1	4	3	3	5	4	4	3	2	5	3	4	4	2	5	5	5	4	4
2	1959	55	2	1	1	2	2	2	4	3	4	4	5	4	4	5	3	4	4	5	2	2	2	4	4	4	4	2	4	4	1	3	5	3	4	4	4	3	3	4	4	4	4	4	4	5	4	3	3
1	1953	61	3	1	2	2		3	3	5	3	5	5	5	5	3	1	1	3	5	2	3	1	5	5	1	3	5	5	5	1	4	1	3	3	5	3	4	3	3	5	5	4	5	1	5	4	4	4
2	1960	54	2	2	1	1		2	2	3	4	3	5	3	4	2	3	3	4	5	4	4	4	3	5	2	4	5	3	3	1	3	4	5	2	3	3	3	5	3	4	3	4	3	4	5	5	4	3
2	1954	60	3	2	1	2		2	4	2	3	3	3	5	3	4	2	4	2	5	2	4	3	2	4	3	5	5	4	3	1	3	4	5	3	3	3	4	3	5	3	3	4	2	4	5	5	4	3
2	1974	40	2	1	1	2	1	1	4	2	2	4	5	4	5	4	2	4	4	5	1	2	4	2	4	4	4	2	4	5	1	4	2	5	4	2	4	3	3	2	4	4	4	4	3	4	4	4	3
1	1949	65	3	1	2	3		2	2	4	4	3	4	5	3	2	2	4	2	5	2	2	4	4	4	2	4	5	4	4	1	3	2	5	4	1	2	3	4	5	4	2	4	1	1	5	5	3	3
1	1946	68	3	1	1	4		2	4	2	4	4	2	4	2	4	2	3	2	4	2	4	4	2	4	2	4	2	2	4	2	4	4	4	4	3	4	4	2	4	3	4	4	2	4	3	3	4	3
2	1950	64	3	1	1	4		2	3	4	4	4	4	4	3	4	3	4	3	4	3	4	3	2	4	2	3	3	3	4	2	3	3	4	4	3	2	3	2	4	4	4	4	3	3	4	4	4	1
2	1983	31	2	2	1	2	2	2	4	4	3	4	3	4	4	4	1	2	3	5	2	3	3	4	3	2	2	4	4	4	1	5	2	3	4	3	4	3	1	4	4	4	4	3	3	5	2	2	2
2	1983	31	2	1	2	1	1	2	4	4	3	4	3	4	4	4	1	2	3	5	2	3	3	4	3	2	2	4	4	4	1	5	2	3	4	3	4	3	1	4	4	4	4	3	3	5	2	2	2
1	1977	37	2	1	1	2	1	2	4	5	4	2	2	4	1	4	1	4	4	4	2	3	1	5	5	1	4	4	2	4	1	4	4	2	5	4	1	1	4	5	5	4	4	2	4	4	2	4	4
1	1977	37	2	1	2	1	1	2	4	5	4	2	2	4	1	4	1	4	4	4	2	3	1	5	5	1	4	4	2	4	1	4	4	2	5	4	1	1	4	5	5	4	4	2	4	4	2	4	4
2	1960	54	2	2	1	4		2	2	4	5	4	4	4	2	2	4	4	2	5	3	5	4	2	5	2	4	4	4	5	1	4	2	5	5	1	2	5	2	5	4	4	4	1	2	5	5	3	1
2	1974	40	2	1	1	3	2	2	2	4	4	3	4	4	3	3	2	2	4	4	1	2	4	4	4	4	4	3	4	4	1	2	2	3	4	1	4	1	2	4	4	4	4	5	5	4	3	4	2
2	1949	65	3	2	1	3	2	3	2	4	4	4	5	5	4	2	2	3	3	5	2	4	2	5	4	1	3	5	5	5	1	3	1	5	4	3	1	3	3	3	4	4	4	1	4	5	4	3	1
2	1948	66	3	2	1	2		3	2	4	4	4	5	4	4	2	2	2	4	5	4	4	2	4	3	2	2	5	2	4	1	3	3	2	4	4	2	2	1	4	4	4	4	4	4	4	4	4	2
2	1983	31	2	1	1	2		2	2	4	5	4	5	4	3	2	1	5	1	5	3	3	2	5	5	2	4	5	4	5	1	4	2	4	4	2	2	2	2	4	5	4	4	5	2	2	5	3	3
2	1988	26	1	2	1	2	1	2	4	4	4	4	3	4	3	3	2	4	3	5	2	4	4	2	2	4	1	4	2	4	2	3	2	4	4	1	4	2	5	5	4	4	4	3	4	5	2	4	3
1	1944	70	3	1	1	3		3	2	4	4	4	4	4	5	2	2	2	3	4	2	2	2	3	4	2	4	4	4	5	1	4	3	4	4	4	3	3	2	3	4	4	4	3	2	4	4	4	3
2	1959	55	2	1	2	1	1	2	4	3	4	3	4	4	4	4	1	2	3	5	4	4	4	3	4	2	4	2	3	3	1	4	4	4	4	2	3	3	2	3	4	4	4	2	4	5	2	5	1
2	1995	19	1	2	1	4		3	3	4	4	3	4	4	4	3	2	3	4	4	2	4	2	3	4	3	4	3	4	4	1	3	3	4	4	2	4	4	3	4	4	4	4	5	3	3	2	3	3
2	1953	61	3	1	1	2		4	3	4	4	4	5	5	5	4	3	2	3	5	2	4	4	3	4	2	4	3	4	4	1	4	4	3	4	3	3	4	1	4	4	4	4	2	5	5	4	4	1
2	1996	18	1	1	2	4	1	2	4	5	4	3	4	5	4	5	3	4	3	4	2	4	3	3	4	4	4	2	3	2	1	3	4	4	4	3	2	5	2	5	4	4	4	5	4	5	4	4	3
2	1957	57	3	1	1	1		2	2	5	4	4	5	5	4	3	2	2	4	5	3	4	2	5	5	1	4	3	4	3	1	3	4	4	4	4	2	3	3	5	5	4	4	4	3	4	4	4	2
2	1958	56	3	1	1	4		4	2	4	5	5	5	5	4	3	5	1	5	5	2	3	3	4	5	1	4	4	5	5	1	5	1	2	5	3	1	3	3	4	5	5	4	5	1	5	4	5	3
2	1958	56	3	1	1	2		1	2	4	4	3	5	4	4	2	2	4	2	5	4	4	4	4	4	2	5	3	4	4	1	2	4	4	4	2	3	3	5	5	5	4	4	3	4	5	4	4	1
2	1991	23	1	1	1	2	1	2	2	4	5	4	2	5	5	5	2	4	4	5	2	5	3	4	5	3	5	2	4	3	1	4	4	4	5	2	4	4	1	5	4	5	4	4	5	5	5	4	3
2	1952	62	3	2	1	2		2	2	5	5	4	5	5	5	2	2	3	4	5	2	3	1	4	5	2	5	5	1	5	1	5	4	5	4	3	4	4	4	5	4	4	4	3	2	5	4	4	3
2	1949	65	3	1	3	1	1	3	2	4	4	4	5	5	4	2	2	3	3	5	2	4	2	5	4	1	3	5	5	5	1	3	1	5	4	3	1	3	3	3	4	4	4	1	4	5	4	3	1
2	1993	21	1	2	2	4	1	2	4	3	4	4	2	4	4	4	2	1	2	4	1	1	5	1	4	2	4	2	4	4	1	4	1	2	3	2	4	4	2	4	4	4	4	2	4	4	2	4	4
2	1952	62	3	2	1	2		2	3	3	2	4	2	4	5	2	3	2	2	4	3	4	3	3	3	3	4	4	4	3	1	2	3	4	2	2	3	4	2	2	3	1	4	2	4	3	3	4	3
1	1995	19	1	1	2	4	2	5	2	4	4	4	5	5	3	1	2	3	3	4	2	4	1	5	4	1	4	5	3	4	1	4	2	4	2	3	2	1	1	4	5	3	4	3	4	4	4	4	1
2	1958	56	3	2	2	3		3	2	4	5	5	2	4	5	2	3	2	3	5	2	2	2	4	4	4	3	4	4	4	1	3	2	2	4	3	4	3	2	4	4	4	4	2	2	4	5	3	1
1	1990	24	1	2	2	1	1	3	2	5	2	4	4	4	4	2	2	4	1	4	2	1	1	5	5	2	4	2	3	4	1	3	4	4	4	1	3	2	1	5	5	5	4	5	2	2	4	4	1
1	1967	47	2	1	2	2		2	2	5	4	4	5	4	4	2	1	2	2	4	2	4	2	2	2	4	4	3	4	4	1	2	4	4	4	2	4	4	1	4	4	4	4	3	2	5	4	2	1
2	1954	60	3	1	2	3		1	2	4	4	2	4	3	2	4	3	4	4	5	2	4	4	5	4	4	4	4	4	4	1	1	4	4	4	2	4	4	2	5	4	4	4	3	4	4	4	4	1
2	1951	63	3	1	2	2		2	3	4	5	2	4	4	4	4	3	4	3	5	2	2	3	4	3	3	4	3	2	3	1	3	3	3	5	3	5	4	2	5	4	2	4	3	3	5	5	3	1
2	1974	40	2	1	1	1	2	4	3	1	4	4	4	4	4	2	1	4	4	5	2	3	4	3	5	1	4	4	2	4	1	4	4	4	4	4	1	4	3	2	4	4	4	5	2	4	4	5	3
2	1974	40	2	1	1	3	3	4	3	1	4	4	4	4	4	2	1	4	4	5	2	3	4	3	5	1	4	4	2	4	1	4	4	4	4	4	1	4	3	2	4	4	4	5	2	4	4	5	3
1	1932	82	3	1	1	2		3	2	3	4	4	3	4	4	2	2	3	3	5	3	3	4	4	4	2	3	4	4	4	1	3	4	3	4	2	3	4	1	4	4	4	4	3	3	4	3	3	1
2	1953	61	3	2	1	4		2	2	5	5	4	5	4	4	2	1	3	3	5	3	5	2	5	5	1	3	5	3	4	1	3	4	4	5	4	2	3	3	5	4	3	4	3	3	4	2	4	2
2	1953	61	3	2	1	2		3	4	4	4	4	3	4	4	4	2	2	2	4	2	2	2	4	3	4	3	4	4	5	1	4	3	4	5	4	4	3	3	4	4	4	4	3	3	4	4	4	3
1	1985	29	1	1	1	1	1	4	2	4	5	5	4	3	4	2	2	3	3	5	2	2	2	4	4	2	4	3	2	4	1	5	4	3	5	3	3	2	2	4	3	4	4	4	3	5	4	3	1
2	1961	53	2	2	1	2	1	2	3	4	4	5	3	4	4	4	2	1	3	5	2	5	1	2	5	2	4	5	4	5	2	4	4	4	3	1	2	5	4	5	3	4	4	4	5	5	4	4	1
2	1997	17	1	2	1	4	3	2	4	4	4	4	5	4	3	2	2	4	2	4	3	2	1	2	4	3	5	2	4	2	1	4	5	4	4	4	5	4	2	4	4	5	4	5	2	4	5	4	4
2	1950	64	3	1	2	3		2	3	4	4	3	4	5	4	2	2	4	3	5	4	4	2	4	4	1	4	3	4	4	1	4	4	4	4	3	2	3	4	4	2	4	4	2	3	4	4	5	2
2	1993	21	1	2	2	2	1	1	2	2	4	4	4	5	4	5	1	1	4	1	2	5	5	3	4	5	3	1	4	5	1	5	2	1	4	4	4	2	5	2	1	5	4	4	5	4	2	4	4
2	1951	63	3	1	1	2		4	2	4	5	2	5	5	3	2	1	3	5	5	2	1	3	3	4	2	4	5	4	5	1	5	5	4	4	3	3	4	2	4	5	4	4	1	2	5	4	2	2
2	1958	56	3	2	2	2		2	1	5	4	3	5	4	4	3	2	2	3	5	4	4	3	5	4	2	4	5	3	5	1	3	3	4	5	4	3	3	4	5	4	3	4	3	3	3	4	4	2
2	1997	17	1	1	1	2	3	2	4	5	4	5	1	4	4	5	2	3	3	5	2	2	5	5	5	4	5	1	4	5	1	1	3	2	5	2	5	4	4	5	4	5	4	5	3	5	4	5	2
1	1939	75	3	1	3	1		5	3	5	5	4	5	5	5	1	1	5	3	5	3	3	3	5	4	1	3	5	3	5	1	3	4	3	5	2	1	3	3	5	5	4	4	3	2	5	5	3	1
2	1986	28	1	1	1	1	1	2	4	5	2	4	4	4	3	5	4	3	2	2	1	3	4	3	4	4	4	5	4	3	1	3	5	5	4	3	5	5	5	5	5	5	4	4	4	5	5	5	5
2	1974	40	2	1	1	2	1	2	3	5	4	3	4	5	4	3		2	2	5	2	4	3	4	4	2	4	3	4	4	1	3	2	3	4	2	4	3	2	4	3	5	4	3	2	4	4	3	2
2	1951	63	3	2	1	4		3	3	4	4	3	3	4	3	2	2	3	3	5	2	2	3	4	4	1	3	4	2	4	1	3	3	2	2	3	2	4	1	3	4	4	4	2	4	4	3	2	1
2	1985	29	1	2	1	2	1	2	2	4	3	4	2	4	2	3	2	4	3	5	2	2	2	3	2	4	4	3	4	3	1	4	4	4	2	5	4	4	3	3	4	2	4	4	4	4	4	3	2
1	1945	69	3	1	2	3		4	2	3	4	5	5	5	5	2	1	2	4	5	2	2	2	2	4	1	4	5	5	5	1	5	1	5	4	4	4	2	1	5	2	5	4	4	2	3	2	2	1
1	1988	26	1	2	1	2	3	3	3	4	4	4	3	3	4	2	2	2	3	5	2	2	2	4	4	2	3	5	4	4	1	1	4	4	2	2	2	2	1	5	5	4	4	4	3	5	3	3	2
2	1972	42	2	1	1	2	2	2	3	4	4	4	3	4	4	3	3	3	3	4	2	3	2	4	4	3	4	4	3	4	1	3	3	4	4	2	4	4	4	4	4	3	4	2	3	4	4	3	2
2	1972	42	2	1	2	1	1	2	3	4	4	4	3	4	4	3	3	3	3	4	2	3	2	4	4	3	4	4	3	4	1	3	3	4	4	2	4	4	4	4	4	3	4	2	3	4	4	3	2
2	1957	57	3	2	1	2		1	4	4	4	3	2	3	3	2	3	2	3	4	2	4	1	4	4	4	3	5	3	4	1	1	4	3	4	1	4	4	5	5	4	3	4	2	5	5	4	4	1
2	1948	66	3	1	2	2		4	2	4	5	5	5	4	4	3	1	2	3	5	2	4	2	5	5	4	2	4	3	5	1	3	4	4	4	3	4	3	2	4	4	4	4	2	3	3	3	2	5
2	1974	40	2	2	1	1	2	3	2	4	4	5	5	4	4	2	1	2	4	5	1	1	4	5	4	3	4	4	5	4	3	5	2	3	4	4	4	4	4	4	3	3	4	3	4	5	2	4	3
2	1974	40	2	1	1	1	1	3	2	4	4	5	5	4	4	2	1	2	4	5	1	1	4	5	4	3	4	4	5	4	3	5	2	3	4	4	4	4	4	4	3	3	4	3	4	5	2	4	3
2	1955	59	3	2	2	4		2	2	5	4	4	4	5	4	3	2	3	4	5	1	1	4	4	5	4	4	4	5	5	1	4	4	2	4	4	2	3	5	4	4	4	4	2	2	4	5	4	2
2	1941	73	3	1	2	3		2	3	5	5	3	4	5	4	2	2	3	4	5	2	2	2	5	5	2	4	5	4	4	1	5	5	5	4	4	2	2	4	5	5	4	4	2	5	5	4	4	5
2	1996	18	1	2	1	4	2	2	2	5	5	4	5	4	4	4	2	3	4	5	2	4	2	4	3	5	3	4	5	4	1	4	1	3	4	4	4	3	4	5	5	5	4	3	4	5	5	3	5
2	1996	18	1	1	4	1	1	2	2	5	5	4	5	4	4	4	2	3	4	5	2	4	2	4	3	5	3	4	5	4	1	4	1	3	4	4	4	3	4	5	5	5	4	3	4	5	5	3	5
2	1986	28	1	1	1	2	1	2	4	3	4	4	5	4	5	5	2	4	2	5	3	4	4	3	2	4	4	2	5	3	1	3	4	5	4	2	4	5	5	4	2	5	4	3	4	5	4	4	1
2	1952	62	3	1	2	1		2	3	5	2	4	5	5	5	3	2	3	5	5	4	5	1	5	4	3	4	3	5	5	1	4	4	4	4	5	2	4	2	4	5	5	4	5	2	4	4	4	4
2	1986	28	1	1	2	1	1	1	5	3	4	3	5	4	4	4	3	4	3	4	1	3	3	4	4	4	4	2	4		4	4	4	4	4	3	5	5	2	5	4	4	4	4	4	3	2	2	1
1	1984	30	1	1	1	3	3	4	1	4	4	5	5	5	1	2	1	4	5	1	1		1	4	5	2	5	1	5	5	2	1	5	4	5	5	4	4	5	4	5	2	4	5	1	5	5	4	4
2	1953	61	3	2	1	4		2	2	5	4	3	5	5	3	1	1	2	1	5	2	3	2	5	4	2	4	5	3	4	1	3	4	4	3	1	5	3	4	4	4	3	4	3	4	5	3	4	1
2	1947	67	3	1	1	4		3	2	3	4	3	3	4	3	4	2	3	4	5	2	4	1	3	3	1	3	4	4	3	1	3	4	4	4	1	1	3	5	5	4	3	4	1	5	4	4	4	1
2	1982	32	2	1	1	1	2	4	4	2	3	3	5	4	4	4	2	4	3	5	1	2	3	3	4	5	4	3	3	4	1	3	5	4	4	3	5	2	4	5	3	4	4	4	4	4	4	3	3
2	1982	32	2	1	1	3	3	4	4	2	3	3	5	4	4	4	2	4	3	5	1	2	3	3	4	5	4	3	3	4	1	3	5	4	4	3	5	2	4	5	3	4	4	4	4	4	4	3	3
1	1973	41	2	2	1	3		3	1	5	4	5	5	5	5	1	1	2	3	4	2	3	1	5	5	1	3	5	5	5	1	5	1	1	2	4	1	1	1	2	5	5	4	5	1	1	1	5	5
2	1954	60	3	2	2	3		2	3	5	5	4	4	5	4	1	2	4	3	5	3	4	3	4	3	1	4	4	4	5	1	4	2	4	5	3	2	3	1	5	4	4	4	1	3	5	5	4	3
2	1961	53	2	1	1	1	1	3	1	5	5	4	5	5	5	2	1	2	4	5	1	4	4	2	4	2	4	3	5	5	1	5	1	2	4	3	2	3	3	5	4	4	4	3	1	4	5	3	3
2	1959	55	2	1	2	4		3	1	3	4	4	5	5	4	2	2	3	4	5	2	2	2	2	3	2	2	4	4	4	1	4	2	4	4	3	2	2	5	4	5	4	4	4	4	4	4	4	1
2	1954	60	3	2	2	3		3	1	5	5	5	5	5	5	3	1	2	5	5	3	4	1	5	5	1	3	3	4	5	1	3	2	1	5	3	1	3	3	5	5	5	4	2	3	4	4	4	1
1	1984	30	1	2	1	1	1	4	1	4	4	5	5	5	1	2	1	4	5	1	1	3	1	4	5	2	5	1	5	5	2	1	5	4	5	5	4	4	5	4	5	2	4	5	1	5	5	4	4
2	1968	46	2	1	1	3	1	4	2	5	4	4	4	4	5	3	2	2	3	5	2	2	2	4	4	2	3	4	4	5	1	4	4	4	4	4	4	2	4	5	5	4	4	2	3	5	5	4	3
2	1944	70	3	1	1	4		2	4	3	4	3	3	4	3	4	2	4	3	5	2	4	5	4	4	2	4	4	4	4	1	3	2	4	5	2	3	4	3	4	4	4	4	2	4	5	4	4	3
2	1989	25	1	1	1	2	2	4	4	5	4	5	1	4	5	4	1	4	4	5	2	2	4	4	5	1	5	3	4	4	1	5	5	4	1	4	1	4	1	5	3	5	4	5	5	4	5	4	2
2	1989	25	1	1	2	1	1	4	4	5	4	5	1	4	5	4	1	4	4	5	2	2	4	4	5	1	5	3	4	4	1	5	5	4	1	4	1	4	1	5	3	5	4	5	5	4	5	4	2
2	1953	61	3	1	1	2		2	3	4	4	5	1	5	4	2	2	2	2	5	4	5	1	5	4	2	4	3	4	5	1	3	5	3	4	4	2	3	4	5	4	4	4	4	4	4	4	4	4
2	1953	61	3	1	3	3		4	3	2	5	5	4	5	5	1	2	4	4	5	1	4	1	2	5	2	5	3	5	5	1	4	4	3	5	5	4	4	1	5	3	4	4	1	2	4	5	5	3
2	1974	40	2	1	1	3	3	2	3	5	5	2	5	2	4	3	2	5	3	5	3	2	2	2	4	3		3	3	3	1	4	5	4	3	1	3	2	3	2	3	3	4	1	3	5	3	4	1
2	1994	20	1	2	2	4	1	2	2	3	3	4	4	3	4	4	2	2	4	5	2	4	3	2	3	3	4	1	4	4	3	4	4	2	3	1	3	4	2	4	3	4	4	4	2	3	4	4	3
2	1997	17	1	2	1	4	1	1	5	2	5	4	5	5	2	5	1	3	3	5	3	1	5	3	3	5	5	1	3	3	1	4	4	4	2	2	5	3	3	5	3	4	4	1	5	5	5	4	3
1	1981	33	2	1	1	1	1	2	2	4	4	5	4	4	2	4	1	1	3	5	1	2	3	5	4	3	4	2	4	4	1	4	4	5	2	2	5	4	2	4	5	2	4	2	4	5	4	4	2
1	1981	33	2	1	1	1	1	2	2	4	4	5	4	4	2	4	1	1	3	5	1	2	3	5	4	3	4	2	4	4	1	4	4	5	2	2	5	4	2	4	5	2	4	2	4	5	4	4	2
1	1947	67	3	1	1	4		2	2	3	5	2	3	4	5	2	4	1	4	5	2	5	3	5	4	1	4	3	3	5	1	5	2	2	5	5	1	3	1	5	4	3	4	1	2	5	2	2	1
1	1937	77	3	1	1	2		2	2	4	5	4	4	5	4	1	1	4	4	5	4	5	1	4	5	1	4	5	2	5	1	3	4	4	5	1	1	4	1	4	4	2	4	1	2	5	4	2	1
2	1986	28	1	2	2	3	1	3	2	4	5	5	3	4	4	3	3	3	3	5	2	3	2	4	4	3	3	3	4	4	1	4	5	4	3	2	3	3	3	3	3	4	4	3	1	4	3	3	3
1	1956	58	3	1	2	2		2	2	4	5	4	5	4	4	4	2	4	3	5	2	4	1	2	5	2	4	3	2	4	1	2	4	4	4	1	2	2	5	4	5	4	4	2	2	4	4	5	2
2	1950	64	3	1	1	4		3	3	5	5	2	2	4	5	2	2	4	4	5	2	1	1	2	4	1	5	2	5	3	1	3	2	5	5	3	4	4	1	5	2	4	4	1	3	5	5	5	3
2	1994	20	1	2	1	2	1	4	2	2	4	4	2	3	3	5	1	4	3	5	1	4	4	3	4	2	4	3	4	2	1	5	3	3	2	5	5	1	1	4	3	4	4	2	2	5	3	3	3
2	1995	19	1	2	1	4	1	3	5	4	4	4	3	5	4	4	1	3	3	4	3	4	2	4	3	4	5	2	4	4	1	3	3	4	4	3	4	3	2	3	4	4	4	5	5	3	4	3	4
2	1959	55	2	1	1	2		2	1	5	4	3	5	5	3	1	1	2	4	5	4	3	3	4	5	1	5	5	5	5	1	4	2	5	4	4	1	4	4	5	5	3	4	3	3	4	5	4	3
2	1955	59	3	1	2	4		3	4	4	4	3	5	4	4	3	2	3	4	3	1	4	1	5	5	3	4	4	4	5	1	4	3	5	4	3	3	4	4	4	5	5	4	3	3	5	4	4	2
2	1983	31	2	1	1	1	1	2	2	4	4	4	5	5	5	1	1	4	4	4	3	5	1	4	4	1	4	2	5	4	1	3	4	3	3	2	1	2	5	5	5	5	4	5	3	5	4	4	3
1	1945	69	3	1	1	4		1	3	2	2	3	4	5	5	4	4	1	4	5	4	2	1	4	3	5	5	5	4	4	1	3	4	2	2	1	2	3	1	4	4	3	4	2	2	1	2	3	1
2	1944	70	3	1	2	3		2	5	1	4	2	2	4	2	5	4	5	4	5	2	1	5	1	1	4	4	3	1	3	1	4	2	5	5	3	4	5	4	3	1	4	4	1	2	4	3	3	3
2	1977	37	2	2	1	1	1	2	3	5	4	4	4	3	4	2	2	3	3	5	2	1	3	5	3	4	3	5	4	4	1	3	2	3	4	2	4	2	2	5	4	3	4	2	2	5	4	2	2
2	1989	25	1	2	1	2	1	2	4	3	4	4	3	2	4	5	2	4	3	5	2	2	4	4	4	5	4	2	3	3	1	3	5	5	4	1	5	3	2	5	4	3	4	4	3	5	4	3	2
1	1989	25	1	2	1	2	1	2	5	4	2	4	4	4	4	4	2	2	2	5	1	2	2	4	2	5	4	3	4	4	1	2	3	4	3	2	5	4	2	3	4	4	4	3	3	4	4	2	1
2	1983	31	2	1	1	1	1	2	4	5	4	4	4	4	4	5	2	3	3	5	2	4	5	3	3	1	4	2	3	4	1	2	3	3	4	4	2	3	3	4	3	4	4	4	4	4	3	3	2
2	1943	71	3	2	1	2		1	3	4	4	5	5	5	5	4	1	4	3	5	1	2	1	5	3	1	3	5	5	5	1	5	4	5	4	1	3	3	1	5	4	4	4	5	1	4	2	4	1
2	1957	57	3	1	1	4		1	4	4	4	4	4	4	2	4	2	4	3	4	1	1	4	2	4	4	4	3	5	4	1	4	4	4	5	4	5	5	4	5	5	5	4	2	4	5	2	4	1
1	1947	67	3	1	1	3		2	4	4	4	2	4	5	4	4	3	4	4	5	1	5	1	5	5	1	5	4	2	4	1	3	5	5	5	1	2	5	3	5	5	4	4	2	2	5	5	4	3
2	1942	72	3	2	1	4		4	2	3	5	5	5	5	5	4	4	1	5	3	1	5	5	5	4	1	5	3	5	3	1	4	4	5	3	4	1	3	5	5	3	5	4	1	1	5	5	4	1
2	1994	20	1	2	1	2	1	2	5	4	5	2	5	4	4	5	4	3	2	5	1	2	5		5	2	5	2	4	5	1	2	2	1	4	1	5	2	1	4	5	3	4	5	5	5	5	5	1
2	1975	39	2	2	1	1	1	1	5	4	4	1	1	4	2	5	1	5	2	4	1	4	5	2	2	5	5	1	2	3	1	2	5	5	4	1	5	5	2	3	2	2	4	2	4	4	4	4	1
2	1954	60	3	1	2	2		3	4	4	4	3	2	4	4	3	2	4	2	5	2	1	1	3	3	4	3	4	2	3	1	2	3	5	5	1	3	2	1	5	4	3	4	1	2	5	5	4	1
2	1955	59	3	1	2	4		1	3	3	4	3	4	4	4	4	2	3	3	3	2	4	4	4	4	4	4	3	3	4	1	3	4	3	5	1	5	3	2	2	3	3	4	3	3	4	3	2	1
2	1975	39	2	1	2	1	2	1	5	4	4	1	1	4	2	5	1	5	2	4	1	4	5	2	2	5	5	1	2	3	1	2	5	5	4	1	5	5	2	3	2	2	4	2	4	4	4	4	1
2	1974	40	2	1	1	4	2	3	2	2	4	3	3	4	4	3	2	4	4	5	3	3	1	4	4	2	4	3	4	5	1	3	4	4	4	2	3	2	2	5	4	3	4	3	3	5	4	3	2
2	1974	40	2	1	4	2	2	3	2	2	4	3	3	4	4	3	2	4	4	5	3	3	1	4	4	2	4	3	4	5	1	3	4	4	4	2	3	2	2	5	4	3	4	3	3	5	4	3	2
2	1941	73	3	1	1	4		3	5	3	2	3	3	4	4	5	1	3	3	1	2	3	1	3	4	2	4	3	3	3	1	4	2	3	5	3	3	4	3	3	3	3	4	3	5	3	4	3	3
1	1927	87	3	1	1	2		1	2	5	4	4	4	4	4	2	2	3	3	5	2	2	3	4	4	1	4	5	5	4	1	2	4	4	5	1	3	3	5	4	4	3	4	2	3	4	5	2	2
2	1970	44	2	1	2	1		5	2	5	4	5	4	5	5	2	1	4	4	2	1	1	1	4	4	4	3	4	4	4	1	5	2	2	4	5	4	3	2	4	4	5	4	4	2	2	4	4	3
1	1993	21	1	2	2	2	1	2	5	4	3	5	5	5	3	5	3	4	3	5	1	1	3	5	2	5	5	2	4	5	1	4	1	4	4	1	5	3	2	5	4	3	4	5	2	5	3	2	1
2	1956	58	3	1	2	3		2	2	5	4	4	5	4	4	2	2	3	4	4	2	3	2	4	4	3	4	4	5	4	1	3	4	5	5	4	2	4	3	4	3	4	4	2	2	5	4	4	2
	1995	19	1	2		4	1	3	2	4	5	3	5	5	3	4	1	3	3	5	1	3	3	4	5	4	4	4	3	4	1	4	3	5	2	3	5	4	5	5	4	3	4	3	4	5	5	4	3
1	1946	68	3	2	2	2		3	2	2	4	4	5	5	4	4	1	4	4	4	1	3	2	4	4	5	4	4	4	5	1	3	4	3	4	4	5	4	2	5	4	4	4	4	3	4	4	4	2
2	1951	63	3	1	1	3		1	2	4	4	4	4	4	4	5	1	4	3	5	1	1	2	4	2	5	5	5	5	5	1	3	3	4	4	2	5	5	5	5	4	3	4	4	4	4	4	4	1
2	1985	29	1	1	2	2	2	1	4	3	4	3	4	4	4	4	1	4	3	5	1	5	3	2	4	2	4	2	3	4	1	4	4	4	4	1	3	3	2	4	4	4	4	5	3	5	5	3	3
2	1985	29	1	2	2	1	1	1	4	3	4	3	4	4	4	4	1	4	3	5	1	5	3	2	4	2	4	2	3	4	1	4	4	4	4	1	3	3	2	4	4	4	4	5	3	5	5	3	3
2	1976	38	2	1	1	2	2	1	2	5	4	5	5	5	4	4	1	4	2	5	1	2	1	5	4	2	5	5	4	5	1	3	2	5	4	1	2	1	1	5	5	4	4	4	2	5	5	4	1
2	1976	38	2	1	2	1	1	1	2	5	4	5	5	5	4	4	1	4	2	5	1	2	1	5	4	2	5	5	4	5	1	3	2	5	4	1	2	1	1	5	5	4	4	4	2	5	5	4	1
2	1970	44	2	2	2	2	2	2	1	5	4	4	5	5	4	2	1	4	4	5	2	2	1	2	4	1	4	5	4	5	1	5	4	5	4	5	2	2	2	5	4	4	4	2	2	5	1	4	5
2	1970	44	2	2	2	1	1	2	1	5	4	4	5	5	4	2	1	4	4	5	2	2	1	2	4	1	4	5	4	5	1	5	4	5	4	5	2	2	2	5	4	4	4	2	2	5	1	4	5
2	1959	55	2	1	1	4		2	1	5	5	3	5	4	5	1	1	5	5	5	1	3	1	5	5	1	5	5	5	4	1	3	2	4	5	3	2	4	4	5	5	5	4	4	2	5	5	5	4
2	1991	23	1	2	1	3	1	2	4	5	4	3	5	5	5	4	2	5	4	5	1	2	2	5	4	5	4	5	5	5	1	4	2	5	5	5	5	5	4	5	4	4	4	2	5	5	5	4	1
1	1962	52	2	2	2	2		2	4	4	4	3	2	5	3	3	1	3	2	5	2	2	5	4	5	3	4	2	4	5	1	4	2	3	3	1	3	2	2	2	5	4	4	3	2	4	4	4	2
2	1947	67	3	2	1	2		2	3	3	4	3	3	3	3	4	4	2	4	3	2	2	2	3	4	3	3	5	4	4	1	4	3	2	4	3	4	3	2	3	3	3	4	2	3	3	4	4	3
2	1952	62	3	1	1	2		3	4	5	4	4	4	4	3	2	2	4	4	5	2	2	3	4	4	4	3	3	4	4	1	3	4	5	5	5	5	4	3	5	5	4	4	2	3	4	2	4	5
2	1944	70	3	1	1	2		2	2	5	4	3	5	4	4	2	2	5	3	5	2	2	1	4	3	2	4	4	4	3	1	3	4	3	5	1	4	3	5	5	3	4	4	2	2	4	3	3	4
2	1993	21	1	2	2	3	1	2	4	3	4	5	4	5	5	5	2	1	3	4	1	2	5	2	1	5	3	3	5	4	1	4	2	3	3	3	5	1	3	5	3	5	4	5	3	3	5	5	5
2	1946	68	3	1	1	4		1	3	2	3	4	2	4	5	3	1	3	4	3	1	2	2	3	2	4	5	1	4	5	1	4	2	3	4	2	4	2	2	3	2	4	4	3	3	4	3	2	1
2	1948	66	3	1	1	4		1	3	4	3	3	5	4	4	5	2	2	3	5	1	1	3	3	1	5	2	4	3	4	1	1	2	5	3	1	5	3	1	4	3	3	4	1	3	4	4	3	1
2	1984	30	1	2	1	1	2	2	5	3	5	4	2	3	3	5	1	1	1	2	1	2	3	4	4	3	2	5	2	4	1	5	2	2	4	1	4	5	2	1	5	5	4	2	3	2	2	2	1
1	1949	65	3	1	1	2		2	3	3	4	3	4	4	4	3	2	4	3	5	2	2	2	5	4	2	3	4	3	4	1	3	4	5	5	2	3	4	4	3	5	2	4	2	3	4	3	4	1
1	1996	18	1	2	2	2	1	2	2	5	4	4	5	5	4	3	2	3	1	5	1	2	3	4	4	4	1	5	4	4	1	5	2	3	3	1	4	3	4	4	5	4	4	2	2	5	4	3	4
2	1935	79	3	2	1	3		4	2	4	2	4	5	3	4	2	1	4	2	5	3	4	3	4	2	1	5	5	4	5	1	4	4	5	5	1	1	4	4	5	2	2	4	2	2	4	4	2	1
2	1945	69	3	2	2	4		2	4	4	3	2	4	3	5	4	2	3	3	5	2	3	2	5	3	4	3	4	3	5	1	3	2	2	4	3	4	4	5	5	4	4	4	3	5	5	2	3	1
2	1994	20	1	1	2	2	3	2	4	4	4	4	4	4	2	2	1	1	5	5	1	4	2	2	4	2	1	3	5	5	1	1	2	4	4	5	1	4	5	5	4	3	4	2	2	5	5	4	5
2	1986	28	1	1	2	2	1	1	2	3	4	2	2	5	3	5	1	5	1	4	1	1	5	2	1	5	5	3	3	2	1	2	5	5	4	1	5	1	1	3	5	4	4	4	2	4	4	3	1
2	1949	65	3	1	1	2		2	2	3	2	4	4	5	5	2	1	4	3	5	2	2	1	3	4	2	4	4	2	5	1	3	4	3	4	3	2	1	2	3	2	4	4	3	3	5	2	4	3
2	1962	52	2	1	1	4	2	1	2	5	4	4	4	4	5	1	1	2	3	5	1	1	2	3	1	4	2	2	4	5	1	3	1	3	1	1	4	1	5	5	5	5	4	4	2	5	4	2	1
2	1997	17	1	2	1	4	2	1	5	5	2	4	1	2	1	4	1	4	1	2	1	1	2	4	2	2	4	1	4	4	1	2	2	4	4	1	2	4	2	4	5	4	4	4	4	1	2	4	1
2	1960	54	2	1	2	2		2	5	5	3	5	5	5	5	5	1	3	4	5	2	2	3	3	5	4	5	3	5	4	1	4	5	5	2	5	5	4	4	3	5	3	4	3	4	4	3	5	3
[truncated: 98 more columns]

## Sheet: PANAS& SWL
PANAS 1	2	3	4	5	6	7	8	9	10	11	12	13	14	15	16	17	18	19	20	21	22	swl 1	S2	S3	S4	S5
5	2	4	4	4	2	2	2	4	5	3	4	1	3	4	5	3	4	2	2	3	3	4	6	4	2	5
4	3	4	4	2	4	4	1	4	2	2	4	4	4	5	4	3	4	3	4	4	4	5	6	7	6	2
4	1	4	1	5	5	1	1	3	4	3	4	2	1	3	4	4	5	3	2	1	5	2	2	2	2	2
4	1	4	1	5	5	1	1	3	4	3	4	2	1	3	4	4	5	3	2	1	5	2	2	2	2	2
4	1	3	2	1	4	2	1	3	2	2	4	3	2	3	4	2	1	4	1	2	3	6	6	5	5	3
4	1	5	2	4	3	2	2	5	4	3	4	3	4	2	4	4	1	3	1	2	4	1	2	2	1	1
4	2	3	1	4	4	1	1	3	3	3	3	1	2	1	3	4	1	2	1	2	4	2	2	2	2	2
4	2	3	1	4	4	1	1	3	3	3	3	1	2	1	3	4	1	2	1	2	4	2	2	2	2	2
4	3	3	2	3	4	3	2	3	3	2	3	3	4	3	4	3	3	3	3	2	3	5	5	5	6	5
5	2	5	2	4	2	2	2	5	3	2	2	1	4	1	5	3	2	3	2	2	5	6	5	5	6	7
5	3	3	3	2	4	4	1	3	2	3	3	2	3	4	3	3	4	2	2	3	3	2	2	4	2	1
1	4	1	4	1	2	1	2	1	3	4	2	1	2	4	2	1	3	1	1	5	2	2	5	1	4	1
1	4	1	4	1	2	1	2	1	3	4	2	1	2	4	2	1	3	1	1	5	2	2	5	1	4	1
4	2	4	3	3	4	2	2	4	4	4	4	3	4	2	4	4	3	3	2	2	3	2	3	4	3	3
4	1	3	2	1	1	1	1	3	4	2	4	1	5	2	5	4	1	3	1	2	5	5	7	6	2	7
5	1	3	2	4	3	1	4	1	2	4	1	2	2	1	2	2	2	3	1	5	2	1	5	1	6	1
5	1	4	2	4	2	1	1	5	3	2	4	1	5	2	5	4	3	4	2	3	4	2	6	3	5	6
4	3	3	1	5	1	1	2	3	4	3	3	1	3	2	4	4	3	5	1	1	3	3	6	5	3	5
4	1	4	1	4	2	2	2	5	5	2	3	2	5	3	5	5	1	5	2	2	4	7	6	6	5	6
5	1	4	1	5	1	1	1	4	5	1	2	1	4	1	4	4	1	5	1	1	5	7	7	7	7	7
5	1	4	1	5	1	1	1	4	5	1	2	1	4	1	4	4	1	5	1	1	5	7	7	7	7	7
4	3	5	2	2	3	2	3	5	4		3	2	3	2	3	3	2	3	2	3	4	6	6	6	5	3
3	1	3	2	4	3	2	1	4	3	3	4	3	4	2	3	4	2	4	2	2	4	6	6	6	5	3
3	1	3	2	4	3	2	1	4	3	3	4	3	4	2	3	4	2	4	2	2	4	6	6	6	5	3
4	1	3	1	4	1	1	1	4	4	2	4	1	4	1	3	3	1	3	1	1	5	6	6	7	7	5
4	1	3	1	4	1	1	1	4	4	2	4	1	4	1	3	3	1	3	1	1	5	6	6	7	7	5
5	3	5	2	4	2	2	1	5	5	2	4	1	4	2	3	3	1	3	2	1	5	7	6	6	7	3
4	1	4	2	4	1	1	1	4	3	2	4	1	3	1	3	3	1	3	1	2	4	5	6	7	6	7
3	4	3	3	3	2	2	1	4	3	3	3	1	2	3	3	3	4	3	3	2	4	5	4	4	3	2
4	1	5	2	4	1	1	1	4	5	1	5	1	4	1	4	4	1	4	1	1	4	5	4	6	4	2
4	1	4	2	3	2	1	1	5	3	2	3	1	5	2	5	4	1	4	1	1	4	5	5	6	3	2
4	2	5	2	3	5	1	2	5	3	4	4	3	4	2	4	3	3	4	3	2	4	5	5	5	3	2
3	2	3	2	3	1	1	3	3	4	4	3	1	4	3	3	4	2	2	1	2	3	4	3	3	2	5
4	1	4	2	3	2	1	1	5	3	2	3	1	5	2	5	4	1	4	1	1	4	5	5	6	3	2
4	1	3	2	4	1	1	1	4	3	2	4	1	4	2	4	4	1	2	1	2	4	6	6	6	7	6
4	1	5	4		1	1	1	4	4	1	4	4	4	1	3	4	1	3	1	1	5	6	7	7	6	6
5	1	4	2	4	1	1	1	4	4	2	4	1	5	2	4	4	2	4	1	1	4		6	6	6	5
4	1	3	1	2	2	1	1	3	3	1	3	1	4	1	3	4	1	3	1	1	4	6	6	6	4	7
4	1	4	1	4	1	1	1	4	3	2	4	1	3	1	4	4	1	4	1	1	3	4	6	6	5	2
4	1	4	1	5	1	1	1	5	3	2	4	1	5	2	4	3	1	5	2	1	5	7	7	7	7	7
5		1	2	4	1	1	1	4	5	2	4	1	5	3	4	5	1	4	2	1	3	1	4	2	1	3
4	2	3	2	4	1	2	2	2	2	4	2	1	2	1	1	4	1	1	1	1	4	1	4	2	1	1
3	3	4	4	4	2	2	1	4	3	2	2	1	4	3	4	4	1	4	1	2	3	3	5	5	5	5
3	2	3	2	2	3	2	1	3	3	3	3	2	3	2	2	3	3	2	2	2	3	2	2	5	6	6
2	4	3	1	3	1	2	1	3	4	2	3	1	4	1	5	3	1	3	1	1	5	7	7	7	7	7
2	4	3	1	3	1	2	1	3	4	2	3	1	4	1	5	3	1	3	1	1	5	7	7	7	7	7
4	1	3	1	4	2	2	1	3	4	3	5	1	4	1	5	4	1	4	1	1	4	5	6	6	7	5
4	2	3	2	4	3	1	1	3	4	2	3	1	4	2	5	4	2	2	1	1	3	2	3	2	3	2
5	1	4	1	5	1	3	1	5	5	1	5	1	5	1	5	2	4	1	1	1	4	4	5	7	3	3
4	4	5	2	3	1	5	1	4	3	2	3	3	2	5	4	2	4	4	5	1	4	6	2	5	2	3
3	4	3	3	2	3	3	4	3	4	4	3	2	4	3	4	2	2	3	3	4	3	3	3	3	3	3
3	2	4	3	3	2	1	1	4	2	2	3	1	3	1	4	3	1	3	1	1	4	3	3	3	5	3
4	3	3	3	3	2	2	2	4	3	3	4	3	4	3	4	4	2	2	2	2	3	5	6	5	6	6
4	2	5	1	5	1	1	1	5	4	1	3	1	4	1	4	4	1	4	1	1	5	6	6	6	6	7
3	2	1	3	1	5	1	1	2	2	5		1	3	1	4	4	3	5	1	5	2	1	3	1	1	6
4	2	5	2	5	3	2	1	5	3	3	4	2	4	3	3	4	5	4	2	2	3	4	5	5	4	3
4	2	5	2	5	3	2	1	5	3	3	4	2	4	3	3	4	5	4	2	2	3	4	5	5	4	3
4	3	3	3	3	2	2	2	4	3	3	4	3	4	3	4	4	2	2	2	2	3	5	6	5	6	6
5	2	2	3	1	2	2	1	3	3	3	4	2	4	2	5	1	2	3	2	2	3	3	5	5	3	3
4	2	5	2	2	2	2	1	5	3	2	3	2	5	3	3	3	3	4	2	2	4	5	7	7	6	2
4	2	4	2	4	3	2	1	5	5	2	4	1	5	2	5	5	2	3	2	1	5	5	6	6	6	6
4	1	5	2	3	2	5	1	5	5	1	4	1	4	4	5	5	2	2	4	1	5	6	6	7	6	6
3	1	4	2	2	4	2	2	4	2	1	3	3	2	1	3	4	2	2	2	4	5	3	3	3	2	1
4	3	4	2	3	2	2	2	4	3	2	3	1	4	2	3	4	2	4	2	4	2	5	4	2	5	6
4	3	4	2	3	2	2	2	4	3	2	3	1	4	2	3	4	2	4	2	4	2	5	4	2	5	6
5	3	4	2	5	2	3	4	3	4	4	4	2	4	5	4	3	4	4	3	2	3	5	5	4	5	7
5	3	4	2	5	2	3	4	3	4	4	4	2	4	5	4	3	4	4	3	2	3	5	5	4	5	7
4	3	4	3	3	2	2	2	4	4	3	3	1	3	1	3	4	1	2	1	1	3	5	6	5	6	7
4	1	3	3	4	2	1	2	3	5	2	4	1	4	1	5	4	1	4	2	2	4	6	3	6	6	7
3	2	4	1		1	1	2	4	1	4	5	2	1	3	4	4	1	4	1	2	4	5	3	6	6	2
4	4	4	3	3	2	2	1	4	4	4	4	2	3	3	5	4	1	4	2	3	4	2	3	3	6	2
4	3	3	2	3	2	1	2	3	3	2	3	1	3	2	3	3	1	2	1	2	3	5	6	5	5	5
4	3	3	2	3	2	1	2	3	3	2	3	1	3	2	3	3	1	2	1	2	3	5	6	5	5	5
4	1	4	2	4	1	1	1	4	3	2	4	1	4	1	4	4	1	4	1	1	4	7	6	7	7	6
5	1	5	1	5	1	1	1	5	5	1	5	1	5	1	5	5	1	5	1	1	5	1	1	1	1	1
4	3	4	3	2	2	3	2	4	4	4	2	3	4	4	3	2	1	2	3	4	4	5	5	5	5	3
4	3	3	4	2	1	2	1	2	4	2	2	1	3	4	4	3	1	2	1	2	3	2	5	2	2	2
3	4	3	3	2	3	4	4	3	1	4	2	4	2	4	2	2	3	1	4	4	3	1	2	2	1	4
4	1	4	3	2	4	4	3	3	3	3	3	4	3	3	2	2	3	1	4	2	3	2	5	3	4	2
3	1	3	2	3	1	1	1	4	2	2	3	1	3	1	3	4	2	3	1	2	3	5	5	5	6	6
5	1	3	2	4	1	2	1	1	4	3	5	1	3	3	5	5	1	5	1	3	4	3	3	6	7	4
4	2	3	1	3	1	1	1	3	3	2	3	1	4	2	4	4	2	2	2	2	4	4	5	4	2
4	2	4	2	4	3	2	1	5	5	2	4	1	5	2	5	5	2	3	2	1	5	5	6	6	6	6
4	2	4	1	5	1	2	1	4	2	1	2	1	3	2	4	4	1	3	1	2	3	2	6	3	5	2
5	2	4	1	4	2	1	1	4	5	2	3	1	4	3	3	3	1	4	2	2	3	6	5	6	5	6
5	2	4	1	3	2	1	1	5	4	1	3	1	4	2	4	3	1	4	1	2	4	2	6	3	5	3
4	4	4	3	4	4	4	2	4	4	2	3	3	4	4	4	5	4	4	4	4	4	6	6	6	6	5
4	3	3	2	4	1	1	1	5	4	2	3	1	5	1	5	3	2	4	1	2	4	4	6	6	6	6
3	1	3	1	2	1	1	2	4	3	2	4	1	3	2	3	4	2	4	1	2	3	6	6	6	5	6
4	1	4	1	4	1	1	4	4	4	2	4	1	5	2	5	4	3	4	2	1	3	6	6	6	5	4
3	2	3	2	1	2	2	1	3	2	2	3	2	3	4	3	3	2	3	3	3	3	3	6	4	6	3
4	3	4	3	2	1	1	1	4	3	4	4	1	3	4	2	4	4	4	1	2	5	5	5	5	3	3
3	1	3	1	2	1	1	2	4	3	2	4	1	3	2	3	4	2	4	1	2	3	6	6	6	5	6
4	1	4	1	4	1	2	1	5	4	2	5	1	4	2	4	5	2	5	2	1	5	6	7	7	6	6
4	1	4	1	3	2	1	1	5	5	2	4	1	3	2	4	4	1	3	1	2	4	6	6	6	7	6
4	2	4	3	2	3	2	2	3	3	2	3	2	4	1	2	3	1	3	2	3	4	6	6	6	6	2
2	3	2	1	3	1	1	1	3	4	2	4	1	4	2	4	3	3	3	2	1	4	4	6	6	5	3
4	3	3	3	4	2	3	2	4	4	3	3	3	4	2	4	4	1	3	3	3	4	3	4	3	3	3
5	2	5	2	4	1	1	1	5	3	2	4	1	5	2	4	4	2	3	1	2	4	5	6	6	6	6
3	1	4	1	3	1	1	1	4	4	1	3	1	4	1	4	4	1	5	1	1		1	1	1	1	1
4	2	4	2	3	1	2	1	4	4	2	3	1	4	2	5	4	2	4	2	2	4	3	5	5	3	3
4	2	3	2	4	2	2	1	4	4	2	5	2	4	2	3	3	2	4	2	2	3		6	6	6	2
4	1	4	2	5	2	1	1	5	4	2	4	1	4	2	4	4	1	4	1	1	4	6	6	6	5	3
4	1	4	1	3	1	1	1	4	3	2	3	1	3	1	3	3	1	3	1	2	4	7	7	7	6	7
3	4	2	4	1	3	3	1	2	3	4	3	5	2	4	1	2	4	1	3	4	2	2	2	5	3	2
5	1	4	1	5	1	1	1	5	4	2	5	1	5	1	5	4	1	4	1	1	5	5	7	7	5	5
5	2	4	2	3	2	2	2	5	4	2	3	1	4	2	3	3	2	3	2	2	3	3	3	3	5	2
4	1	3	1	4	1	1	1	4	4	2	4	1	4	1	5	4	1	4	1	1	5	6	6	7	6	5
4	1	4	2	4	1	1	2	5	4	2	5	1	5	2	5	4	1	5	1	1	5	7	6	7	6	6
4	1	2	1	4	2	1	3	2	3	3	4	2	4	1	4	3	1	4	1	2	2	3	5	5	5	2
4	1	2	1	4	2	1	3	2	3	3	4	2	4	1	4	3	1	4	1	2	2	3	5	5	5	2
5	1	4	1	5	1	1	1	5	4	2	5	1	5	1	5	4	1	4	1	1	5	5	7	7	5	5
3	3	3	5	3	3	3	3	3	3	3	2	3	3	3	3	3	3	3	3	3	3	4	6	3	2	3
3	2	3	3	2	1	1	5	3	3	3	3	1	2	3	4	4	2	1	1	2	2	3	5	2	2	2
4	3	3	3	2	2	1	1	3	2	2	4	2	3	3	2	3	2	3	1	3	3	5	6	3	5	2
4	3	3	3	2	2	1	1	3	2	2	4	2	3	3	2	3	2	3	1	3	3	5	6	3	5	2
4	1	4	1	3	2	1	1	5	3	2	2	2	3	2	4	2	1	5	1	1	5	6	7	7	6	2
4	1	3	2	3	1	2	2	4	4	2	3	1	3	1	2	4	1	5	1	2	4	5	6	4	3	3
4	4	3	2	2	2	2	2	2	3	2	2	2	2	2	2	2	2	2	2	2	2	1	1	1	1	1
3	2	4	3	2	4	3	1	3	2	1	2	1	3	4	3	2	3	2	2	2	5	3	5	3	5	7
4	2	2	2	3	2	2	1	2	4	3	4	1	2	2	3	2	1	3	1	2	4	6	6	4	5	3
5	2	5	2	4	1	2	1	5	3	4	5	1	5	4	4	3	4	5	3	2	4	5	7	6	6	5
4	1	4	2	4	3	1	2	5	5	2	5	2	4	1	4	4	1	5	1	1	5	6	7	7	6	6
5	1	4	2	3	2	2	4	3	3	4	3	1	4	2	3	4	3	3	2	2	3	5	3	4	5	4
5	2	4	1	4	2	1	1	5	1	3	5	1	4	1	4	3	1	4	1	2	4	4	6	6	6	2
4	2	4	1	4	1	1	2	4	3	3	3	1	3	2	4	3	2	4	2	1	4	6	6	6	6	3
5	2	4	2	3	2	2	2	5	4	2	3	1	4	2	3	3	2	3	2	2	3	3	3	3	5	2
4	1	4	3	4	2	1	2	4	5	2	4	1	5	2	4	4	2	4	1	2	4	5	6	6	6	2
4	2	3	2	4	1	2	1	5	4	2	3	1	5	2	5	5	1	3	2	1	4	6	7	6	6	6
5	2	4	3	4	2	2	2	5	5	2	5	1	3	3	4	4	2	4	1	2	4	1	6	5	5	2
4	1	3	1	4	1	1	1	4	4	2	4	1	4	1	5	4	1	4	1	1	5	6	6	7	6	5
5	1	5	1	5	1	1	1	5	5	2	4	1	5	4	5	5	2		1	1	5	6	7	7	6	6
5	1	5	1	5	1	1	1	5	5	2	4	1	5	4	5	5	2		1	1	5	6	7	7	6	6
5	1	5	2	4	1	1	1	5	4	2	5	1	5	1	4	5	1	5	1	2	5	6	7	7	6	4
5	4	3	3	5	5	4	1	3	3	4	4	4	4	5	5	4	5	4	4	4	4	4	7	2	1	7
5	1	5	2	5	1	1	2	5	5	2	5	1	5	2	5	5	2	5	1	2	5	6	6	6	6	6
4	1	4	3	3	2	3	1	4	3	4	2	1	3	3	3	3	3	4	2	3	4	6	6	6	4	4
4	1	3	1	4	1	1	1	4	4	2	4	1	4	1	4	4	1	4	1	1	4	6	6	6	6	4
3	3	2	2	1	1	2	2	3	3	4	3	1	2	4	3	3	4	1	2	3	3	3	3	2	5	2
3	2	4	1	2	2	3	2	4	2	3	3	2	4	3	4	4	2	3	2	2	4	4	5	5	3	3
4	2	3	2	4	3	1	4	3	3	4	4	2	2	1	3	3	3	3	2	2	4	5	5	4	3	3
4	2	3	2	4	3	1	4	3	3	4	4	2	2	1	3	3	3	3	2	2	4	5	5	4	3	3
4	1	3	2	3	2	1	2	3	3	3	4	2	4	1	4	4	2	5	1	2	5	5	7	6	5	6
5	3	2	1	2	1	1	1	3	1	4	3	2	4	2	2	3	1	2	1	2	4	5	5	6	6	2
4	1	3	2	4	2	1	1	5	3	2	4	1	4	3	5	5	2	4	1	2	5	6	6	6	6	4
4	1	5	2	4	1	2	1	5	4	1	4	1	5	2	5	4	1	5	2	1	5	6	6	7	6	6
3	2	2	3	3	3	2	4	4	2	3	3	1	4	2	4	3	3	2	2	3	3	5	5	5	6	5
4	1	3	2	4	1	1	1	3	4	3	4	1	3	2	3	3		4	1	1	5	6	6	7	6	7
3	3	3	3	3	2	2	2	3	3	4	3	3	3	4	3	3	2	2	2	3	3	4	6	5	4	4
4	1	4	1	3	1	1	1	4	4	1	4	1	3	2	3	4	1	4	1	2	4	6	6	6	6	3
2	3	1	2	1	4	4	2	1	1	2	1	2	1	4	2	2	3	1	4	4	2	5	5	5	2	1
2	3	1	2	1	4	4	2	1	1	2	1	2	1	4	2	2	3	1	4	4	2	5	5	5	2	1
3	1	2	2	2	2	1	1	3	2	1	2	1	3	2	3	3	1	2	1	2	2	6	5	7	6	7
4	1	3	1	4	2	1	1	4	3	1	4	1	4	1	3	4	1	3	1	1	4	6	6	6	7	6
4	3	4	3	3	2	2	2	4	4	2	4	2	3	3	3	4	1	4	2	2	4	5	5	6	6	5
4	3	4	3	3	2	2	2	4	4	2	4	2	3	3	3	4	1	4	2	2	4	5	5	6	6	5
4	1	4	1	4	2	1	1	4	4	1	4	1	4	1	4	4	1	4		1	4	1	5	6	5	1
4	1	4	1	4	1	1	1	4	3	2	4	1	4	1	3	4	1	3	1	1	4	6	6	6	6	3
4	2	4	1	4	1	1	1	5	5	2	4	1	4	1	5	5	1	5	1	1	5	6	6	6	6	6
4	2	4	1	4	1	1	1	5	5	2	4	1	4	1	5	5	1	5	1	1	5	6	6	6	6	6
3	3	2	1	4	2	2	2	3	4	2	2	2	5	3	5	2	1	4	1	1	5	4	6	6	3	2
3	3	2	1	4	2	2	2	3	4	2	2	2	5	3	5	2	1	4	1	1	5	4	6	6	3	2
4	2	4	2	3	1	1	1	4	5	2	2	1	3	2	3	5	1	3	2	2	4	6	5	6	6	3
4	4	4	4	4	3	3	3	4	4	3	4	1	4	3	4	4	2	4	2	2	5	3	4	4	5	3
5	2	4	1	4	3	2	2	4	4	3	5	2	4	3	4	4	2	4	2	2	4	6	6	6	6	2
4	1	3	1	2	1	1	1	4	4	2	4	1	4	1	4	4	1	4	1	2	4	6	6	7	7	6
4	2	5	4	4	3	2	3	5	5	4	4	3	5	1	5	4	1	4	2	1	5	5	6	5	7	6
5	2	4	2	4	1	2	1	5	4	2	4	1	4	1	4	4	1	5	1	2	4	5	6	5	6	5
5	2	4	2	4	1	2	1	5	4	2	4	1	4	1	4	4	1	5	1	2	4	5	6	5	6	5
5	4	5	3	3	4	2	2	5	4	2	2	1	5	2	5	3	3	4	1	2	4
4	2	4	2	4	1	1	1	4	4	2	4	1	3	2	4	4	1	3	1	2	4	6	5	7	6	6
3	3	3	3	2	2	2	3	3	2	4	2	1	2	2	3	2	2	3	2	3	3	3	4	2	2	3
4	2	5	1	5	4	1	1	5	2	2	3	1	2	2	4	4	4	3	1	1	5	6	7	7	3	6
4	5	4	5	2	3	5	3	3	3	4	5	3	4	5	2	3	5	2	5	5	3	5	3	3	5	2
5	5	5	5	2	5	4	4	5	2	4	5	5	5	5	5	4	5	4	4	4	4	5	6	7	7	2
4	3	2	3	3	2	1	1	4	3	4	5	1	5	3	4	5	1	4	1	3	3	5	6	5	5	1
3	2	3	2	4	1	1	1	3	3	1	4	1	4	1	4	3	1	3	1	2	3	6	6	6	6	5
3	4	2	4	1	3	3	1	3	3	4	2	2	1	2	2	3	1	3	4	5	3	2	3	2	5	2
4	2	2	2	3	1	1	1	3	3	2	3	1	2	2	3	3	2	2	1	2	3		3	5	6	2
3	4	3	3	2	2	2	1	3	2	4	2	2	3	4	2	3	2	2	4	4	3	7	2	2	2	2
4	1	4	1	4	1	1	1	4	3	2	3	1	4	1	4	3	1	3	1	2	4	6	6	5	6	3
4	3	4	2	5	3	2	2	4	5	3	4	3	5	4	5	3	2	4	2	3	4	5	6	6	5	6
3	4	3	2	1	1	5	3	4	4	2	3	3	3	4	4	3	5	3	4	1	5	4	6	4	7	1
4	2	3	1	3	1	2	1	3	3	2	3	1	2	4	2	3	4	2	1	1	4	3	6	3	4	2
4	2	3	1	3	1	2	1	3	3	2	3	1	2	4	2	3	4	2	1	1	4	3	6	3	4	2
4	3	2	3	3	2	1	1	4	3	4	5	1	5	3	4	5	1	4	1	3	3	5	6	5	5	1
4	2	3	3	4	2	2	1	4	4	3	4	1	4	2	4	4	1	5	2	2	4	6	7	6	6	6
5	3	4	2	3	1	3	1	4	4	2	2	1	3	2	4	3	2	3	2	1	3	4	4	4	6	1
5	3	5	2	3	1	2	1	5	3	2	3	1	4	2	3	3	1	4	2	3	5		6	7	6	4
4	3	2	4	4	3	1	4	4	5	4	3	2	3	4	5	4	3	3	1	4	3	2	2	2	2	6
5	1	3	2	4	1	2	2	4	3	2	3	2	4	2	4	4	2	5	2	2	4	6	6	7	6	6
4	2	3	2	2	2	2	1	4	4	1	2	1	4	2	3	4	1	4	1	2	4	5	5	6	6	3
4	2	3	2	2	2	2	1	4	4	1	2	1	4	2	3	4	1	4	1	2	4	5	5	6	6	3
5	2	5	2	4	2	2	1	5	5	2	4	2	5	3	5	5	2	5	2	2	5	2	3	3	3	2
4	2	2	2	3	2	3	1	3	3	2	3	1	3	1	3	4	3	3	1	3		5	6	6	5	6
4	2	4	2	5	1	2	1	5	5	3	4	1	4	3	5	5	2	5	1	1	5	6	6	7	6	6
4	3	4	3	3	2	2	1	4	3	2	3	1	4	3	3	3	4	3	2	2	4	5	6	6	4	6
5	2	5	2	4	1	2	2	5	5	2	5	1	5	2	5	4	2	5	2	2	5	3	2	4	5	7
5	1	5	2	4	2	1	1	5	4	2	5	1	5	3	4	4	2	4	1	2	5	7	7	7	6	6
5	1	4	2	3	1	1	1	5	3	4	5	1	5	3	4	5	3	4	1	1	4	5	5	5	6	3
3	4	4	4	2	3	1	1	3	2	4	2	2	2	3	2	2	2	1	1	2	4	3	4	2	2	2
3	2	2	2	3	2	3	2	3	1	4	3	2	2	2	5	4	2	2	2	1	1	2	6	3	1	3
4	4	3	2	3	1	5	1	3	3	1	2	4	4	4	4	3	3	3	5	2	3	3	5	2	2	2
4	1	4	2	4	2	1	2	4	4	4	4	1	3	3	4	4	2	4	1	3	5	5	7	5	5	7
5	2	5	3	4	1	1	1	5	5	2	5	1	5	2	5	5	2	5	2	3	4	5	6	6	6	6
3	2	3	2	3	2	2	4	3	3	4	2	2	3	3	4	3	2	3	2	3	3	4	4	5	5	3
4	2	4	2	4	3	2	2	5	5	2	4	2	4	2	4	4	1	5	2	3	4	5	6	6	6	6
4	2	4	1	3	1	1	1	5	4	2	4	3	4	4	4	4	3	2	1	1	5	6	7	7	6	3
4	1	3	1	3	1	1	1	2	1	1	3	1	2	1	3	4	1	3	1	1	3	2	4	4	5	5
4	3	4	3	4	2	2	1	4	3	4	4	2	4	3	4	4	3	4	2	2	4	6	6	6	5	2
3	2	2	2	3	2	3	2	3	1	4	3	2	2	2	5	4	2	2	2	1	1	2	6	3	1	3
4	2	5	1	4	2	2	2	4	3	3	2	1	4	2	2	2	1	3	1	2	4	3	5	2	3	2
2	5	4	4	2	3	3	3	4	4	4	4	2	2	5	4	4	5	2	3	4	3	5	5	3	3	1
4	1	4	1	4	2	1	1	4	3	2	4	2	3	1	4	3	1	4	1	1	4	7	7	7	7	7
5	1	5	1	5	1	1	1	5		2	5	1	5	1	5	5	1	5	1	1	5	7	7	7	7	6
4	1	3	1	3	1	1	1	2	1	1	3	1	2	1	3	4	1	3	1	1	3	2	4	4	5	5
4	3	4	2	3	4	4	3	4	4	3	4	4	3	4	4	4	4	4	4	3	3	3	5	5	4	2
5	1	3	1	3	1	1	1	5	5	4	4	2	4	2	4	4	1	4	1	1	5	7	7	6	6	7
4	3	4	4	3	4	3	3	3	3	4	3	2	3	3	3	3	3	3	3	3	3	3	3	3	5	3
4	2	4	2	4	2	2	2	5	4	2	3	1	5	2	5	4	3	4	2	2	4	6	6	6	6	5
4	2	4	2	4	2	2	2	5	4	2	3	1	5	2	5	4	3	4	2	2	4	6	6	6	6	5
3	2	4	1	4	1	1	1	4	3	2	5	1	3	2	4	3	1	5	1	1	5	6	5	5	6	6
5	2	2	1	3	1	2	1	4	3	1	4	1	2	1	3	3	1	3	2	3	3	3	5	3	5	1
3	1	2	1	3	1	2	1	3	3	2	3	1	3	3	3	2	2	4	1	2	3	5	3	3	6	3
4	1	3	2	5	2	1	1	4	4	2	4	1	4	2	5	5	1	3	1	2	4	6	6	6	6	7
4	1	3	1	3	1	1	1	3	4	2	3	1	3	1	4	4	1	4	1	1	4	6	7	6	7	6
4	2	4	2	5	1	2	2	4	5	3	4	1	4	2	4	4	1	3	1	3	5	6	6	6	7	5
4	2	4	1	3	1	1	1	5	4	2	4	3	4	4	4	4	3	2	1	1	5	6	7	7	6	3
4	1	3	2	3	2	2	2	4	3	2	4	1	4		5		1	3	2	2	4	6	6	6	5	4
4	1	4	1	4	1	1	1	4	4	1	3	1	4	1	4	4	1	4	1	1	4	6	7	7	7	7
5	2	4	3	3	2	1	1	3	5	1	3	2	5	3	5	3	2	2	2	5	5	4	2	3	5	1
5	1	3	1	3	1	1	1	4	4	2	3	1	4	2	3	4	1	4	1	1	4	5	6	6	6	3
4	2	3	2	4	2	1	1	4	3	1	4	1	4	2	4	4	2	4	1	3	4	6	5	6	5	2
3	3	5	2	2	3	1	1	4	3	3	4	2	5	3	4	4	2	4	2	2	5	5	7	6	6	4
4	3	4	4	3	2	2	2	4	3	3	3	2	5	4	4	4	3	4	3	4	4	4	3	6	6	3
4	2	4	2	4	3	2	2	4	4	2	4	2	3	2	4	3	2	3	2	2	4	6	6	6	7	5
2	2	3	2	3	1	1	4	2	2	4	3	1	1	1	3	2	2	2	1	3	2	6	7	5	6	3
4	1	2	1	4	1	1	2	3	2	2	3	1	2	2	2	3	1	3	1	1	3	5	5	6	6	5
4	3	4	2	4	2	1	3	5	5	4	4	2	3	1	5	4	1	5	2	2	3	2	2	2	5	1
2	4	2	4	1	4	2	2	2	2	4	1	3	1	2	1	1	2	3	1	4	3	2	5	2	1	1
2	4	2	4	1	4	2	2	2	2	4	1	3	1	2	1	1	2	3	1	4	3	2	5	2	1	1
3	2	3	1	4	1	1	2	3	3	2	3	1	4	2	3	4	1	3	1	1	4	3	5	3	2	2
4	2	2	2	3	1	1	1	4	3	2	4	1	2	1	5	3	1	4	1	1	3	5	3	6	3	3
5	1	4	1	4	1	2	1	4	4	2	3	1	2	2	3	2	1	3	2	2	5	5	6	7	6	7
5	1	4	1	4	1	2	1	4	4	2	3	1	2	2	3	2	1	3	2	2	5	5	6	7	6	7
4	1	3	2	4	2	2	2	4	4	3	3	1	3	2	3	4	2	4	2	2	4	6	6	6	5	5
5	3	1	2	3	4	2	1	1	1	3	3	3	2	3	4	3	2	3	1	3	2	5	5	3	3	1
3	2	2	3	1	2	2	1	3	2	2	2	1	4	2	4	3	1	1	2	4	2	2	2	1	3	1
4	2	3	2	2	2	2	2	4	3	4	4	2	4	3	3	2	2	2	2	2	3	5	5	5	3	2
2	2	2	3	2	2	2	1	2	2	3	2	2	3	3	2	2	2	2	2	2	2	2	4	3	3	3
4	1	3	1	3	2	1	1	4	4	4	3	1	4	3	4	4	2	3	2	3	4	5	6	6	2	2
5	3	4	4	2	2	3	2	4	4	3	4	1	4	3	5	4	2	3	3	3	4	5	6	3	3	2
4	1	4	1	5	1	1	1	5	5	1	5	1	5	2	5	4	2	1	1	1	4	7	7	7	7	7
5	1	5	2	5	2	2	2	5	5	2	5	1	4	2	5	5	2	4	1	1	5	7	7	7	7	7
4	1	4	1	4	1	2	2	4	4	2	4	1	3	2	4	3	2	4	2	1	5	6	6	6	7	6
4	3	4	4	3	2	2	2	4	3	3	3	2	5	4	4	4	3	4	3	4	4	4	3	6	6	3
4	1	4	1	4	1	2	1	5	5	2	4	1	5	2	4	4	1	4	1	2	5	7	7	7	7	6
4	2	4	1	3	1	1	1	3	5	2	3	1	3	3	4	4	1	3	1	1	5	6	6	6	7	6
4	2	4	1	3	1	1	1	3	5	2	3	1	3	3	4	4	1	3	1	1	5	6	6	6	7	6
5	3	3	2	5	1	1	1	4	5	4	5	1	5	2	5	5	1	5	1	2	4	6	6	6	6	3
5	1	3	1	3	1	1	1	2	3	2	3	1	2	1	4	3	1	3	1	1	4	6	6	6	6	6
5	1	3	1	3	1	1	1	2	3	2	3	1	2	1	4	3	1	3	1	1	4	6	6	6	6	6
5	1	5	2	5	1	1	1	5	5	2	5	1	5	2	5	5	1	5	1	1	5	6	4	6	7	6
4	1	5	1	4	1	1	1	4	4	1	4	1	4	1	5	4	1	5	1	1	4	6	6	7	5	6
5	1	3	1	5	1	1	1	4	4	1	4	1	5	4	5	5	1	5	1	1	5		7	3	5	5
5	1	4	1	3	2	2	1	5	4	2	4	2	5	3	3	4	1	2	2	1	4	6	5	7	5	5
5	1	4	2	4	1	1	1	5	4	2	4	1	4	2	5	5	1	5	1	1	4	6	6	6	6	3
5	2	4	3	4	2	1	1	4	4	4	4	2	4	2	5	4	2	4	2	2	4	4	5	5	5	2
5	2	4	3	4	2	1	1	4	4	4	4	2	4	2	5	4	2	4	2	2	4	4	5	5	5	2
5	2	4	2	4	3	3	3	4	4	2	5	1	4	2	5	5	2	5	2	2	4	6	6	6	6	6
3	1	4	1	3	1	1	1	4	3	2	4	1	3	1	3	3	1	4	1	1	4	6	6	6	5	5
3	2	2	2	3	2	1	1	2	2	1	3	1	3	2	2	3	1	3	1	2	4	2	2	5	3	2
3	5	3	5	2	5	5	5	3	1	5	2	5	1	5	2	2	5	2	5	5	3	2	1	1	5	1
4	3	3	2	3	2	2	1	3	5	5	4	1	3	4	4	3	2	2	2	2	4	6	5	6	6	5
4	1	3	1	4	1	1	1	4	4	2	4	1	4	1	4	4	1	4	1	1	4	6	6	6	6	6
4	3	3	4	4	2	2	3	4	4	3	3	1	3	3	4	4	1	3	2	2	4	3	5	5	5	3
5	2	5	2	5	3	2	5	5	2	2	5	2		2	5	5	1	5	1	1	5	6	6	6	6	6
5	2	5	2	4	1	1	1	5	5	1	5	1	4	1	4	5	1	5	2	2	5	5	5	6	5	1
4	2	4	2	4	1	2	2	4	3	2	4	1	4	2	5	4	1	5	2	2	4	3	6	6	4	3
3	2	2	1	4	2	1	4	3	3	2	4	1	1	2	3	2	1	2	1	1	3	5	6	6	6	3
4	4	3	3	3	2	2	1	4	4	3	3	1	3	1	3	3	1	3	2	2	4	5	4	6	6	2
4	4	3	3	3	2	2	1	4	4	3	3	1	3	1	3	3	1	3	2	2	4	5	4	6	6	2
4	1	5	1	5	1	1	1	5	5	2	4	1	5	1	4	4	1	3	1	1	5	7	7	7	7	7
5	2	4	1	4	1	1	1	4	3	2	4	1	5	1	4	5	1	4	2	2	4	6	6	6	6	6
3	2	3	2	3	3	1	2	4	3	2	3	1	3	2	3	4	2	3	1	2	4	5	5	5	5	5
3	2	3	2	3	3	1	2	4	3	2	3	1	3	2	3	4	2	3	1	2	4	5	5	5	5	5
2	3	4	3	2	1	2	1	3	2	1	2	1	4	4	3	3	1	4	2	3	4	2	3	3	2	2
4	2	4	3	3	4	2	2	4	4	4	4	2	3	3	4	4	3	3	2	2	4	6	6	6	6	6
4	2	4	3	3	4	2	2	4	4	4	4	2	3	3	4	4	3	3	2	2	4	6	6	6	6	6
3	1	4	2	4	4	2	3	5	5	3	3	2	4	2	4	3	2	5	2	3	3	5	5	5	6	3
2	1	2	3	3	1	1	1	2	1	2	4	1	2	1	3	4	2	2	1	3	3	2	3	2	4	1
4	2	4	2	4	2	2	2	4	3	2	3	2	4	2	4	4	2	4	2	2	4	6	6	6	6	6
4	4	3	4	1	2	3	1	4	3	2	3	1	4	4	3	3	4	1	3	5	2		2	2	6	3
5	2	4	2	3	1	2	1	4	4	2	3	1	4	2	4	4	1	4	2	2	4	6	6	6	6	5
5	2	5	2	4	1	1	1	5	5	1	5	1	4	1	4	5	1	5	2	2	5	5	5	6	5	1
4	2	3	2	3	2	2	1	4	4	2	4	1	4	2	4	4	1	4	1	2	4	5	5	5	3	2
5	1	4	1	4	2	1	1	5	4	2	4	1	5	2	4	4	1	4	1	2	4	6	6	6	2	5
4	1	4	1	4	1	1	1	4	4	1	3	1	4	1	4	4	1	1	1	1	4	6	6	6	7	5
3	2	3	2	3	2	2	1	3	3	2	3	1	3	3	3	3	3	2	1	2	3	6	6	6	5	5
3	2	3	2	3	2	2	1	3	3	2	3	1	3	3	3	3	3	2	1	2	3	6	6	6	5	5
4	4	4	5	2	3	5	1	5	3	4	3	5	4	5	5	4	5	4	5	5	3	3	3	3	2	3
4	2	3	2	4	1	2	1	5	4	2	4	1	3	2	4	3	2	4	2	2	4	6	6	6	6	5
4	2	4	2	3	1	1	1	4	4	2	3	1	4	1	4	4	1	3	2	2	4	6	7	7	6	6
4	2	4	2	3	1	1	1	4	4	2	3	1	4	1	4	4	1	3	2	2	4	6	7	7	6	6
4	1	3	2	4	1	1	1	5	3	2	4	1	5	1	3	4	1	4	1	3	3	7	7	6	6	7
4	3	2	3	2	4	2	3	4	4	2	4	2	4	3	4	4	2	3	1	2	3	5	5	5	4	2
4	3	2	3	2	4	2	3	4	4	2	4	2	4	3	4	4	2	3	1	2	3	5	5	5	4	2
4	1	4	1	4	2	1	1	5	4	3	4	1	4	2	5	4	2	4	1	1	4	5	7	5	6	2
4	1	4	1	4	2	1	1	5	4	3	4	1	4	2	5	4	2	4	1	1	4	5	7	5	6	2
4	1	3	1	4	1	1	1	4	4	1	5	1	4	2	4	4	1	4	1	1	4	4	4	6	6	6
3	2	4	2	3	1	1	2	3	3	3	2	1	4	3	3	3	4	3	1	2	4	4	6	5	4	3
5	3	4	4	2	3	1	1	4	2	3	3	2	4	5	4	5	3	2	2	3	4	4	4	4	4	1
4	2	4	2	2	4	1	1	3	2	4	3	1	3	1	4	4	1	4	1	1	5	1	1	1	5	1
5	4	4	4	2	3	3	2	2	2	4	3	4	5	5	3	4	4	1	4	4	3	5	5	5	5	3
5	1	5	3	4	2	2	2	4	3	1	1	1	4	5	5	2	1	5	1	1	4	6	6	6	5	5
4	1	4	1	2	2	1	1	4	3	3	3	1	2	2	3	2	1	1	1	1	2	5	6	6	6	6
2	1	2	1	1	3	1	2	1	2	2	2	1	2	2	2	2	1		1	2	3	5	7	7	6	5
3	3	3	2	2	2	2	3	2	4	4	3	1	2	2	3	4	2	4	1	3	3	4	4	5	5	4
3	2	1	1	1	2	2	2	2	3	2	1	3	3	3	3	2	2	1	2	1	2	5	6	5	6	3
4	2	4	2	3	2	2	3	4	4	3	3	2	4	2	3	3	1	3	2	2	3	5	6	5	5	1
5	3	4	3	2	3	2	1	5	3	3	3	3	4	4	5	3	2	2	2	3	3	2	6	3	4	2
4	3	3	2	4	3	2	2	4	4	3	3	3	4	4	4	4	3	4	3	2	4	5	5	5	6	2
4	2	3	3	3	2	2	1	3	3	2	3	1	3	2	3	4	2	2	2	2	5	6	4	6	7	4
4	5	3	4	3	2	2	4	3	2	4	2	1	2	4	2	2	3	2	2	4	4	2	2	2	3	2
4	2	4	2	3	2	1	1	4	3	2	3	1	2	1	3	3	1	3	1	2	4	6	6	6	5	5
4	2	4	2	5	2	2	3	4	3	2	4	2	5	5	5	4	5	5	2	2	4	5	5	3	6	1
4	1	3		3	1	1	2	4	4	2	4	1	4	1	4	4	1	4	1	1	4	3	3	3	3	6
4	3	3	3	3	3	3	2	4	4	2	4	1	3	2	3	4	2	4	2	3	3	2	2	3	3	1
4	3	3	3	3	3	3	2	4	4	2	4	1	3	2	3	4	2	4	2	3	3	2	2	3	3	1
5	1	5	1	5	1	1	1	5	4	4	5	1	4	1	5	5	1	5	1	1	5	6	7	7	7	5
4	1	4	1	2	2	1	1	4	3	3	3	1	2	2	3	2	1	1	1	1	2	5	6	6	6	6
4	2	3	2	4	2	1	3	4	4	2	3	1	3	3	3	3	2	3	2	4	3	2	3	2	2	6
5	4	4	4	2	3	3	2	2	2	4	3	4	5	5	3	4	4	1	4	4	3	5	5	5	5	3
4	1	4	1	4	1	1	1	4	4	1	4	1	4	1	4	4	1	4	1	1	4	5	6	6	6	3
3	2	1	1	3	4	3	2	2	3	5	4	1	1	4	3	4	1	1	1	4	2			3	6	1
5	3	4	2	4	2	2	2	4	4	3	5	1	5	3	5	4	3	4	1	3	4	5	3	5	3	2
4	3	3	2	3	2	2	1	4	4	2	4	1	4	3	4	4	1	4	1	2	4	4	4	5	4	2
3	3	3	3	4	1	3	1	3	4	2	2	1	3	3	3	2	2		2	3	4	2	5	6		3
4	1	4	1	4	1	1	1	4	3	2	5	1	5	2	5	5	2	5	1	2	4	6	6	6	6	5
4	1	4	1	4	1	1	1	4	3	2	5	1	5	2	5	5	2	5	1	2	4	6	6	6	6	5
4	5	4	5	3	5	4	2	4	3	4	3	4	2	4	3	3	5	5	4	3	4	5	5	5	4	1
4	1	4	1	4	2	1	1	4	3	2	4	1	4	1	4	4	1	4	1	3	4	5	5	5	5	3
5	2	3	3	1	3	3	1	3	4	3	2	3	2	3	3	4	1	3	2	3	4	2	3	3	4	2
4	1	4	2	4	3	2	1	3	3	2	1	2	4	3	3	3	1	3	1	2	3	5	6	6	5	6
4	1	4	2	4	3	2	1	3	3	2	1	2	4	3	3	3	1	3	1	2	3	5	6	6	5	6
4	1	4	1	4	1	1	1	4	3	1	5	1	5	1	5	5	1	5	1	2	4	6	6	6	6	5
5	1	5	2	5	2	1	1	5	2	5	5	2	4	1	5	5	1	5	1	2	3	6	6	6	7	2
4	2	3	2	4	4	2	1	4	4	2	5	1	5	3	5	4	3	5	2	2	4	6	6	6	6	5
4	2	4	3	3	4	2	2	4	3	3	3	1	3	2	3	3	1	3	1	3	4	2	5	6	1	2
5	1	4	1	4	1	1	1	5	4	2	4	1	5	2	5	4	1	4	1	1	4			7	6	6
4	2	3	1	4	1	1	1	4	4	1	3	1	3	2	3	4	2	3	1	1	4	7	6	6	2	3
5	1	5	2	5	2	2	1	5	5	1	5	1	5	2	5	5	1	5	2	2	5	6	6	6	6	6
4	2	5	2	4	3	1	1	5	4	3	4	2	4	5	3		2	5	2	2	3	5	6	6	6	7
3	3	2	4	2	2	3	2	2	1	3	2	1	2	3	2	2	3	1	3	3	3	2	2	2	2	2
4	1	4	1	4	1	1	1	5	4	2	3	1	4	2	3	3	1	4	1	1	4	5	6	6	6	4
2	1	2	2	4	1	1	1	2	3	2	2	1	2	1	2	2	2	2	1	2	3	1	2	2	2	2
3	1	1	1	1	1	1	1	3	4	2	5	1	3	1	5	3	1	2	1	1	4	2	2	2	2	1
4	2	3	3	3	4	4	2	4	3	3	2	4	4	4	4	3	3	3	3	3	3	5	6		6	5
4	1	2	1	4	1	1	2	3	2	3	4	1	2	2	4	4	1	4	1	2	4	3	4	5	5	3
3	1	3	1	4	1	1	2	3	3	2	4	1	3	1	3	4	1	4	1	1	3	6	4	6	6	3
3	3	2	4	3	2	2	3	4	2	4	2	4	2	2	3	3	1	3	2	4	3	2	2	2	2	2
3	3	2	4	3	2	2	3	4	2	4	2	4	2	2	3	3	1	3	2	4	3	2	2	2	2	2
3	2	2	2	2	3	2	1	3	2	3	2	3	2	3	3	3	2	2	2	2	3	5	6	5	6	6
3	2	2	2	2	3	2	1	3	2	3	2	3	2	3	3	3	2	2	2	2	3	5	6	5	6	6
3	2	2	2	2	3	2	2	2	3	2	2	2	3	2	2	2	2	3	2	2	3	5	5	5	5	3
5	2	3	2	4	1	1	1	4	3	3	4	1	3	1	3	4	1	5	1	1	3	5	6	4	6	2
4	1	4	1	4	1	1	1	5	4	2	3	1	4	2	3	3	1	4	1	1	4	5	6	6	6	4
4	2	4	1	4	1	1	1	4	4	2	4	1	4	2	5	5	2	5	1	1	5	7	7	7	7	6
4	2	4	1	4	1	1	1	4	4	2	4	1	4	2	5	5	2	5	1	1	5	7	7	7	7	6
4	1	3	1	4	1	1	1	4	4	1	4	1	3	1	4	4	1	3	1	1	4	6	6	6	6	6
4	1	2	1	4	1	1	2	3	2	3	4	1	2	2	4	4	1	4	1	2	4	3	4	5	5	3
4	1	3	1	3	1	1	1	3	3	2	4	1	3	2	4	4	1	4	1	2	4	5	6	6	6	5
4	2	5	2	4	2	1	2	5	4	2	5	1	5	2	5	4	2	5	1	2	4	6	6	6	6	5
4	2	5	2	4	2	1	2	5	4	2	5	1	5	2	5	4	2	5	1	2	4	6	6	6	6	5
4	2	4	2	4	1	1	2	5	5	3	5	1	2	2	5	4	1	4	1	2	4	3	5	6	6	5
4	1	4	2	4	1	1	1	4	5	2	4	1	4	1	4	4	1	1	1	2	4	3	5	4	6	3
5	1	4	1	4	1	2	1	5	4	2	4	1	4	1	5	5	1	4	1	1	4	6	6	6	6	3
4	2	3	2	1	2	3	2	4	1	2	1	1	2	2	1	3	2	2	3	3	4	3	3	5	3	3
4	1	3	2	2	1	1	1	3	4	1	2	1	2	1	2	4	3	2	1	1	4	5	6	6	3	5
4	1	4	1	4	1	1	1	4	4	1	4	1	4	1	4	4	2	4	1	1	4	6	6	6	6	5
4	2	3	1	4	3	1	1	4	4	3	3	2	4	1	5	4	3	4	1	2	4	6	6	6	6	7
4	2	3	1	4	3	1	1	4	4	3	3	2	4	1	5	4	3	4	1	2	4	6	6	6	6	7
4	2	4	3	4	1	1	1	3	4	3	4	1	3	2	4	5	2	3	1	3	3	3	3	6	5	3
5	2	4	4	4	1	2	1	4	4	2	4	1	3	2	4	4	2	4	1	1	5		6	6	6	5
4	2	4	3	3	1	1	3	4	4	1	5	1	4	2	5	4	1	3	2	2	4	1	1	6	1	1
5	4	3	4	4	5	4	2	4	4	5	3	5	4	5	4	3	5	4	4	5	3	5	6	5	4	3
4	1	4	2	4	2	1	1	4	4	2	4	1	4	2	5	4	1	4	1	2	4	6	6	6	6	6
4	2	3	2	4	1	1	1	4	3	2	4	1	5	3	4	4	2	3	1	2	4	6	6	6	5	5
4	3	4	3	3	1	2	2	4	4	3	4	1	4	3	4	4	3	3	1	2	4	3	5	5	5	6
4	3	4	3	3	1	2	2	4	4	3	4	1	4	3	4	4	3	3	1	2	4	3	5	5	5	6
4	1	3	1	3	1	2	1	4	3	1	4	1	4	2	4	4	1	4	2	2	4	2	2	5	3	2
4	1	4	1	4	1	1	1	5	5	1	3	1	5	1	5	4	1	4	1	1	5	7	7	7	7	3
4	1	2	2	4	1	1	1	3	3	2	3	1	3	2	4	5	2	3	2	2	4		7	7	6	3
5	1	4	1	4	1	1	1	5	4	2	4	1	5	1	5	5	1	5	1	1	4	7	6	7	7	4
4	1	4	2	3	4	1	1	5	3	2	3	3	5	2	4	3	2	2	2	1	4	5	5	6	5	4
4	1	4	2	3	4	1	1	5	3	2	3	3	5	2	4	3	2	2	2	1	4	5	5	6	5	4
4	2	5	2	4	1	2	1	5	3	1	4	1	3	3	5	4	2	5	2	2	5	7	7	7	7	7
4	3	2	2	1	2	2	1	3	1	2	2	2	4	4	3	3	2	1	2	3	2	2	3	2	2	4
3	2	3	4		4	4	4	2	2	4	3	4	2	4	2	3	3		4	4	3		3	3	3	3
4	5	3	5	2	5	5	5	3	2	5	4	5	3	5	3	4	5	4	5	5	2	1	2	1	1	1
5	3	5	1	4	1	1	1	4	4	3	4	1	4	2	4	4	4	4	2	2	5	6	6	7	6	6
4	2	3	2	2	1	1	2	3	4	2	3	1	3	2	4	3	1	2	1	1	4	6	6	6	5	4
4	1	5	2	4	2	2	1	5	5	2	4	1	5	2	5	4	1	4	2	2	5	6	7	7	7	7
5	2	3	1	3	1	1	1	4	3	1	4	1	4	1	4	5	1	4	1	2	4	7	7	7	7	7
4	2	3	2	3	2	1	1	3	3	2	3	1	2	1	3	3	2	3	1	2	3	3	3	5	1	2
4	2	3	1	3	1	1	1	3	3	1	3	1	3	1	3	3	1	3	1	1	3	5	5	5	5	3
2	4	2	2	1	4	3	1	2	2	1	2	1	2	2	1	3	2	2	2	2	2	2	2	2	2	1
4	3	2	2	3	4	2	1	3	3	2	3	2	2	4	2	4	2	2	2	2	3	3	4	3	3	2
4	3	2	2	3	4	2	1	3	3	2	3	2	2	4	2	4	2	2	2	2	3	3	4	3	3	2
2	3	2	3	1	1	2	2	2	2	2	3	1	2	2	2	2	1	2	2	2	2	4	4	4	4	2
2	3	2	3	1	1	2	2	2	2	2	3	1	2	2	2	2	1	2	2	2	2	4	4	4	4	2
3	1	1	1	4	1	1	1	2	3	3	3	1	1	1	3	2	1	2	1	2	2	5	6	6	7	6
4	2	3	1	4	1	1	1	4	4	1	4	1	4	1	4	4	1	4	1	1	4	5	5	5	3	3
4	2	4	2	2	1	2	1	2	3	2	1	1	1	1	1	2	1	1	1	1	2	5	4	4	6	3
4	3	2	2	5	1	3	4	3	4	4	4	1	2	5	4	4	2	1	2	2	4	7	7	6	3	2
4	3	2	3	3	1	2	3	3	3	2	3	1	2	3	4	4	2	2	3	4	4	5	5	5	7	3
3	4	2		1	5	3	3	3	1	4	2	4	4	4	2	2	3	1	4	4	2	1	3	2	4	6
4	1	4	1	4	2	1	1	3	3	1	4	1	3	1	4	2	2	4	1	1	4	3	2	1	6	6
4	1	4	1	4	1	1	1	4	4	2	4	1	3	3	3	3	2	4	2	2	4	6	6	6	6	3
4	2	4	3	3	4	3	2	3	3	3	3	3	3	3	3	3	3	3	2	3	3		6	6	6	3
4	1	3	2	4	2	1	1	4	5	2	4	3	3	1	4	4	1	4	2	2	4	6	7	7	6	6
4	2	4	2	4	2	2	2	4	4	2	4	2	4	3	4	4	3	2		3	4	6	6	5	5	3
4	2	4	2	5	1	2	1	4	5	2	4	1	4	3	5	4	2	5	2	2	4	7	5	7	6	7
4	2	4	2	5	1	2	1	4	5	2	4	1	4	3	5	4	2	5	2	2	4	7	5	7	6	7
4	4	3	3	3	3	4	2	3	4	4	4	3	4	5	4	4	4	4	4	3	4	3	5	5	5	2
4	3	4	2	4	3	2	1	4	4	3	3	1	3	4	4	4	4	4	1	1	4	4	4	4	2	3
4	1	2	1	4	1	1	1	2	3	2	4	1	2	1	4	3	1	5	1	1	4	4	5	5	5	7
4	1	4	1	3	1	1	1	4	4	2	4	1	3	1	4	4	1	4	1	1	4	6	6	6	6	5
4	2	2	2	3	1	1	1	3	1	2	3	2	2	2	3	3	1	3	2	2	3	4	4	4	4	2
4	4	3	3	2	3	3	3	4	3	4	3	3	4	4	2	2	4	2	3	3	3	3	4	5	3	2
5	1	4	2	5	2	1	1	5	4	2	5	1	4	1	5	5	1	4	1	1	3	5	6	6	7	5
3	1		1	3	1	1	1	4	3	1	5	1	3	1	2	5	1	5	1	1	4	3	4	6	4	3
4	4	4	4	1	5	2	1	5	4	2	3	2	4	5	5	4	4	4	2	3	5	2	5	4	5	2
4	4	4	4	1	5	2	1	5	4	2	3	2	4	5	5	4	4	4	2	3	5	2	5	4	5	2
4	1	4	1	4	1	1	1	4	4	2	4	1	4	2	4	4	1	4	1	1	4	6	6	6	6	5
5	1	3	1	3	2	1	1	4	4	2	4	1	3	1	4	4	1	3	1	1	4	2	2	2	5	2
4	2	3	2	4	1	2	1	3	3	3	4	1	3	2	5	4	2	3	2	2	3	3	4	4	3	2
4	2	3	2	4	5	1	1	4	4	2	4	5	4	2	4	4	1	4	1	4	4	2	3	3	1	2
3	2	3	2	3	2	2	2	4	4	2	3	2	4	3	4	3	2	3	2	2	4	6	6	6	5	4
4	2	4	2	4	2	2	2	4	4	2	4	2	4	3	4	4	2	4	2	2	4	6	6	6	6	6
4	1	3	2	4	1	1	1	4	4	2	4	1	4	3	4	4	2	4	2	3	4	5	5	5	5	2
4	1	4	2	3	1	1	1	4	4	2	4	1	4	1	4	4	1	4	1	1	5	6	6	6	6	3
4	2	3	1	4	1	2	3	4	4	2	4	1	4	3	4	4	1	4	1	2	4	5	6	6	6	2
4	2	3	1	4	1	2	3	4	4	2	4	1	4	3	4	4	1	4	1	2	4	5	6	6	6	2
4	2	3	2	5	1	2	1	5	5	1	4	1	4	2	4	4	2	5	2	2	4	2	2	6	6	2
4	2	3	1	3	1	2	1	3	1	1	4	1	3	2	3	4	1	3	1	1	3	6	6	6	6	3
5	1	4	2	4	1	1	1	4	5	2	4	1	4	1	5	4	1	5	1	2	4	6	4	6	6	5
4	1	4	1	4	1	1	1	4	4	2	4	1	5	1	5	4	2	3	1	1	4	6	6	6	6	6
2	4	2	1	4	1	1	1	2	2	1	4	1	5	1	5	4	1	2	1	1	5	5	7	7	7	6
4	2	3	2	5	1	2	1	5	4	2	3	1	2	1	5	4	1	3	1	2	4	6	6	6	5	2
4	2	4	2	4	2	2	2	4	3	2	4	2	4	2	4	4	2	4	2	2	4	5	5	5	5	3
4	4	4	3	4	4	4	3	4	4	4	2	2	4	4	3	4	2	2	3	2	3	4	5	6	4	6
4	2	4	2	4	2	3	3	4	3	2	4	2	4	3	4	4	3	4	3	2	4	4	4	4	6	5
4	2	5	3	3	3	2	1	4	3	4	3	2	5	3	4	3	3	4	1	2	5	6	6	6	6	5
4	1	2	2	4	1	1	1	4	2	2	3	1	3	1	4	4	1	3	1	1	4	5	7	7	7	6
4	1	3	2	4	1	1	2	4	3	2	4	1	5	2	5	5	1	4	1	1	4	6	7	7	7	5
5	3	4	3	4	3	3	3	3	3	3	4	2	5	4	4	4	3	3	3	3	4	6	6	6	6	2
4	4	4	3	3	2	3	2	4	3	2	3	2	3	4	3	3	2	2	2	2	4	5	6	6	6	5
4	1	4	2	4	1	1	2	4	4	3	3	1	4	1	4	3	1	4	1	1	4	5	5	6	6	5
5	1	3	2	3	2	1	3	3	3	2	4	2	4	2	5	5	1	4	2	2	3	3	6	4	4	3
3	2	3	1	3	2	1	1	3	2	1	4	2	2	1	3	2	1	3	2	2	4	6	5	6	6	2
3	2	3	2	4	2	1	2	4	5	4	3	1	3	3	4	3	3	3	1	1	4	3	5	6	6	5
2	5	3	5	1	4	5	5	2	2	5	2	4	2	4	5	4	5	1	5	4	1	1	1	1	1	1
2	5	3	5	1	4	5	5	2	2	5	2	4	2	4	5	4	5	1	5	4	1	1	1	1	1	1
4	2	3	2	3	1	1	2	2	2	2	3	1	3	1	3	3	1	4	1	2	3	4	4	5	5	4
4	2	3	2	3	1	1	2	2	2	2	3	1	3	1	3	3	1	4	1	2	3	4	4	5	5	4
4	1	3	2	1	3	1	1	4	2	3	3	2	3	2	2	4	2	3	1	3	3	1	2	2	3	2
3	4	2	3	2	4	2	1	2	4	3	1	4	2	2	4	4	4	2	3	4	3	2	4	4	3	2
3	3	2	3	3	2	1	2	2	2	3	2	1	3	3	4	2	2	2	1	3	2	1	2	2	1	1
3	3	2	3	3	2	1	2	2	2	3	2	1	3	3	4	2	2	2	1	3	2	1	2	2	1	1
4	1	4	1	4	1	1	1	3	3	2	4	1	4	2	5	4	2	4	1	1	4	6	6	6	6	4
2	2	1	1	3	4	1	1	2	1	2	3	2	3	2	3	4	1	3	1	3	2	1	3	2	2	1
4	1	4	1	4	2	1	1	4	3	2	3	1	4	1	4	4	1	4	1	1	4	6	6	6	6	6
4	1	4	2	4	1	1	1	4	4	2	4	1	3	1	4	4	2	4	1	1	4	6	7	6	6	6
4	1	4	2	4	1	1	1	4	4	2	4	1	3	1	4	4	2	4	1	1	4	6	7	6	6	6
3	2	4	2	3	3	3	2	4	3	2	4	2	4	2	4	3	2	5	2	2	4	5	6	6	6	5
3	2	2	2	4	1	2	2	3	3	2	3	1	5	2	4	3	1	3	1	2	4	6	6	5	6	5
3	2	2	1	3	1	1	1	3	3	2	3	1	3	2	4	3	1	4	1	1	3	5	5	6	5	6
5	1	3	1	3	1	2	1	5	3	2	5	1	4	1	3	3	2	4	1	1	4	6	6	6	6	4
3	4	3	3	4	2	1	1	4	5	3	4	1	4	1	5	4	1	3	1	1	3	4	4	3	4	2
3	3	4	3	4	3	3	2	4	4	5	4	1	4	4	5	4	2	4	4	4	4	3	6	4	5	2
3	3	4	3	4	3	3	2	4	4	5	4	1	4	4	5	4	2	4	4	4	4	3	6	4	5	2
4	4	2	4	2	4	2	2	2	2	4	3	1	3	4	4	3	4	4	2	4	3	5	5	5	3	3
4	1	3	2	3	1	2	2	5	3	2	3	2	4	2	4	4	2	5	1	2	4	6	6	7	6	5
4	3	3	1	2	1	2	1	3	2	1	3	1	4	4	3	3	1	2	4	1	5	6	3	6	5	5
4	1	4	3	5	1	2	1	4	4	1	4	2	5	1	5	4	1	3	2	4	5	6	6	6	4	3
5	1	3	2	4	1	2	1	4	5	2	4	1	4	1	4	4	1	4	1	1	4	5	7	6	5	3
3	4	3	4	2	4	4	2	3	4	3	3	4	3	2	3	3	2	2	4	4	3	2	2	2	2	2
4	1	2	2	4	2	2	1	3	2	2	4	1	3	2	4	4	1	4	2	2	4	4	2	5	6	2
4	3	3	2	4	1	2	1	5	3	2	4	1	4	3	3	3	1	5	1	2	4	6	6	6	6	5
4	3	3	2	4	1	2	1	5	3	2	4	1	4	3	3	3	1	5	1	2	4	6	6	6	6	5
4	1	4	1	3	1	1	1	4	3	1	4	1	4	1	3	3	1	4	1	1	4	6	6	6	6	5
4	3	5	2	4	1	1	1	5	4	2	4	1	3	2	4	4	2	5	2	2	5	6	6	7	5	6
4	2	3	2	2	2	1	1	4	5	2	5	1	5	2	5	4	1	3	2	2	5	4	4	6	4	2
5	1	4	1	4	2	2	1	4	4	1	5	1	5	1	4	4	1	4	1	1	3	6	6	6	6	4
4	2	4	2	5	2	2	2	5	5	4	4	2	5	2	5	5	2	2	2	2	5	2	5	1	5	2
4	1	3	1	3	1	1	1	4	4	1	5	1	4	1	5	4	1	5	1	1	4	6	6	6	6	6
5	1	2	1	4	2	1	1	4	2	1	4	1	4	1	3	4	1	3	1	2	3	4	4	4	6	1
5	1	4	1	5	1	1	1	5	3	1	5	1	4	1	5	5	1	4	1	1	4	6	7	7	6	7
4	1	2	1	3	1	1	1	4	3	1	3	1	3	1	3	4	3	2	1	1	3	5	5	5	6	4
4	1	2	1	3	1	1	1	4	3	1	3	1	3	1	3	4	3	2	1	1	3	5	5	5	6	4
4	1	4	1	4	2	1	1	4	4	1	3	1	3	1	4	4	4		2	1	4	6	6	6	6	3
4	1	4	1	4	2	1	1	4	4	1	3	1	3	1	4	4	4		2	1	4	6	6	6	6	3
4	2	4	2	1	2	3	1	4	3	3	3	2	3	3	4	4	2	3	2	3	3	5	6	6	6	4
4	2	3	2	4	3	2	1	4	5	2	2	2	4	2	5	3	2	3	2	2	4	7	7	7	7	6
4	2	4	2	3	1	1	2	4	3	3	3	1	4	1	4	4	1	3	2	2	4	5	6	6	5	7
5	3	3	2	2	1	1	1	4	3	2	3	1	3	2	3	4	2	3	1	2	4	6	6	6	6	6
5	2	4	2	4	1	2	1	5	2	3	4	1	4	3	4	4	1	3	1	2	4	7	6	7	6	5
4	3	4	3	4	2	2	1	4	5	3	3	1	3	3	4	4	3	3	2	2	4	5	6	6	5	6
4	3	4	1	4	1	1	1	4	4	2	4	1	4	1	4	4	1	3	1	1	4	6	6	5	6	5
2	1	2	1	1	1	1	1	1	1	1	1	1	1	1	1	1	1	1	1	1	2	6	5	5	5	5
2	2	1	1	3	4	1	1	2	1	2	3	2	3	2	3	4	1	3	1	3	2	1	3	2	2	1
4	2	4	1	4	1	3	1	4	4	3	4	1	4	3	4	3	2	3	2	4	3	5	6	5	5	4
4	3	4	2	4	1	3	1	5	4	1	4	1	5	3	4	4	2	4	3	1	4	6	6	6	6	7
4	1	4	3	4	2	1	1	5	5	3	2	1	4	4	5	3	4	2	1	2	5	5	6	7	7	7
4	2	3	2	4	4	2	1	4	3	3	4	2	4	4	3	4	2	2	2	1	4	5	6	6	7	5
4	3	3	3	2	4	1	2	3	3	3	3	3	4	2	3	3	2	3	1	2	4	6	6	6	5	5
3	1	2	1	4	1	1	1	2	2	2	4	1	3	1	5	4	1	3	1	1	1	2	3	2	2	2
5	2	5	2	4	2	3	2	5	3	2	4	3	5	3	4	4	2	4	2	2	4	5	5	5	5	4
4	2	3	2	3	2	1	1	2	2	2	2	1	3	2	3	3	2	3	2	2	3	5	5	5	6	6
4	2	3	2	4	1	1	2	4	4	3	4	1	3	2	4	4	1	3	1	3	4	6	6	6	7	6
3	2	2	3	1	1	1	3	2	2	3	2	1	2	1	3	3	3	2	2	3	3	2	6	3	2	3
3	2	2	3	1	1	1	3	2	2	3	2	1	2	1	3	3	3	2	2	3	3	2	6	3	2	3
4	2	2	2	3	2	1	1	2	1	2	3	3	1	1	2	3	1	2	1	2	2	1	3	2	2	1
4	1	3	1	5	1	2	2	4	5	1	5	1	2	1	4	4	1	3	2	2	5	7	7	7	7	7
4	1	3	2	4	3	2	1	5	4	2	3	1	3	1	4	4	1	4	2	5	4	2	3	6	5	1
4	2	3	2	3	2	2	1	3	2	2	3	1	2	2	4	4	1	4	2	3	3	3	6	5	3	4
4	4	3	2	3	1	1	2	3	3	4	3	1	2	1	1	3	2	3	1	2	3	2	7	2	2	4
4	4	3	2	3	1	1	2	3	3	4	3	1	2	1	1	3	2	3	1	2	3	2	7	2	2	4
3	3	2	2	3	2	1	1	3	3	2	3	1	4	2	4	3	1	4	1	2	2	2	4	3	4	2
3	2	2	1	3	2	2	1	3	4	2	3	1	3	1	3	3	1	3	1	2	3	5	5	5	4	2
5	1	4	4	4	4	1	2	4	4	4	4	4	4	3	5	4	1	5	2	2	4	6	6	6	6	6
3	2	2	1	2	1	1	1	2	2	1	3	1	2	1	2	3	2	3	2	1	3	6	6	6	6	5
4	1	3	1	4	1	1	1	4	4	3	4	1	3	1	4	3	1	4	1	1	4	6	6	6	6	6
4	1	4	2	3	1	1	1	4	2	2	2	1	2	1	2	2	1	4	1	1	4	6	6	6	6	5
4	1	2	1	4	1	1	1	3	1	1	4	1	1	1	4	3	1	4	1	1	3	3	3	3	5	3
4	2	4	2	4	4	1	2	4	4	2	4	2	3	2	4	4	3	4	2	2	4	6	6	6	6	6
3	2	2	2	1	2	2	1	3	2	4	2	3	2	3	2	2	3	2	2	2	2	2	5	3	3	2
4	1	3	2	4	1	2	3	4	4	2	5	1	4	1	5	4	1	5	1	2	5	5	5	5	6	2
3	1	3	1	3	2	1	1	3	3	3	3	2	3	3	3	4	2	3	2	2	3	5	2	4		5
4	1	1	1	4	1	1	1	4	3	1	4	3	3	1	4	4	1	5	1	1	4	6	7	6	6	3
2	3	2	2	1	2	2	1	3	3	3	3	2	2	4	3	4	2	3	2	2	4	1	5	6	3	1
4	2	4	3	3	2	2	1	4	5	1	4	1	3	2	4	4	1	3	2	1	5	7	6	7	7	7
4	2	2	1	3	2	2	1	4	3	2	3	1	4	2	4	3	1	3	1	2	4	5	5	4	5	3
3	2	2	2	3	1	1	2	3	4	2	4	1	2	1	4	3	1	3	1	3	2	3	3	3	5	2
4	2	4	3	4	2	2	2	4	4	3	4	1	4	3	4	4	2	4	2	2	4	6	5	6	6	4
5	1	4	1	2	4	1	1	4	5	2	3	1	3	1	4		1	4	1	1	4	4	6	6	6	5
4	1	3	3	4	3	1	2	4	3	2	4	1	4	2	4	4	2	5	1	2	4	2	2	4	2	1
4	1	2	1	3	2	1	1	4	3	2	3		2	2	3	3	1	2	1		3	5	5	6	6	5
4	2	4	2	4	1	2	1	4	4	2	3	1	4	2	4	4	1	4	2	2	4	5	6	5	6	5
5	4	3	4	4	1	4	2	4	3	3	3	1	3	4	4	4	4	3	4	3	3	6	6	5	6	1
5	2	3	3	4	1	2	1	5	4	3	4	2	4	3	5	4	2	4	1	2	4	6	6	6	6	3
5	2	3	3	4	1	2	1	5	4	3	4	2	4	3	5	4	2	4	1	2	4	6	6	6	6	3
4	1	3	1	4	1	2	1	4	4	1	3	1	4	1	4	4	1	4	1	1	4	6	6	6	6	5
4	3	3	2	5	2	2	1	4	5	1	4	1	4	2	5	4	1	4	2	1	4	4	4	5	5	2
4	2	5	2	4	3	2	1	5	5	1	4	2	5	2	4	4	1	5	1	2	5	6	7	7	7	7
4	1	4	1	4	1	1	1	4	4	1	4	1	4	1	4	4	2	4	1	1	4	5	5	5	6	3
4	2	4	3	3	1	2	2	4	3	3	3	2	4	2	4	4	2	4	2	2	4	6	5	6	5	5
4	1	3	1	2	1	1	1	4	4	1	4	1	3	1	5	4	4		1	1	4	7	7	7	7	6
4	1	5	2	5	3	3	3	5	5	2	5	2	5	4	5	4	2	4	3	3	4	2	4	4	3	1
4	2	3	2	4	3	2	2	3	4	2	3	3	3	2	4	2	2	2	2	2	3	6	6	6	7	3
5	1	3	1	3	1	1	1	4	5	1	4	1	3	2	4	4	2	4	1	1	5	6	7	6	6	2
4	2	3	2	4	4	4	1	3	4	2	3	2	4	3	4	4	3	5	3	2	4	7	7	7	7	6
4	1	4	3	4	1	1	1	4	5	1	3	1	4	2	4	5	2	4	2	1	4	5	6	6	6	3
4	3	3	3	2	4	1	2	3	3	3	3	3	4	2	3	3	2	3	1	2	4	6	6	6	5	5
4	4	4	4	4	4	3	2	4	4	4	4	2	4	4	4	4	4	4	4	2	4	3	5	5	6	2
5	2	3	2	3	1	1	1	4	1	1	2	1	4	1	4	4	1	4	1	1	4	6	6	6	6	6
4	2	1	2	1	2	2	1	2	2	1	2	1	4	3	3	3	1	3	2	3	3	5	5	5	6	6
4	2	3	2	3	1	1	1	4	4	1	4	1	4	2	4	4	2	3	1	2	4	6	6	6	2	5
4	1	4	1	4	3	1	1	5	5	3	4	1	4	2	5	4	2	4	2	2	5	6	7	7	7	7
5	1	4	1	4	1	1	1	5	4	1	4	1	4	1	4	4	1	4	1	1	5	6	6	6	3	7
3	4	5	5	3	3	4	4	5	2	5	3	1	4	5	4	4	5	4	3	4	5	5	3	3	6	5
5	3	3	2		2	2	2	4	4	4	4	2	4	3	5	5	2	5	2	2	3	5	2	5	3	7
4	2	4	3	3	3	3	3	3	3	3	4	4	4	3	3	3	3	3	3	3	3	5	5	5	5	4
5	2	4	2	4	4	4	2	5	5	3	4	2	5	4	5	4	2	4	1	1	5	7	7	7	7	7
5	2	3	2	3	1	1	2	4	4	3	4	2	4	3	4	4	3	5	2	2	4	6	5	6	6	6
4	3	4	4	2	1	1	2	2	2	2	4	1	1	2	4	4	2	4	1	4	4	1	3	3	3	1
3	1	4	1	3	1	1	1	5	4	1	4	1	3	1	3	3	1	3	1	1	5	5	5	6	3	5
4	2	3	1	2	2	2	3	4	3	3	3	1	4	3	3	3	2	2	1	1	3	6	6	6	5	6
4	2	3	1	2	2	2	3	4	3	3	3	1	4	3	3	3	2	2	1	1	3	6	6	6	5	6
3	2	2	1	3	2	1	1	2	4	3	4	2	2	2	3	4	1	2	1	1	3	6	3	4	4	6
4	2	3	1	4	2	1	1	4	3	4	4	2	3	2	5	3	1	4	2	2	4	4	4	5	6	6
3	2	3	3	3	3	3	3	3	3	3	3	3	3	3	3	3	3	3	3	3	3	3	4	3	4	2
3	1	2	1	3	2	1	1	3	2	3	2	2	3	2	3	4	1	1	1	1	3	5	5	5	5	3
3	1	2	1	3	2	1	1	3	2	3	2	2	3	2	3	4	1	1	1	1	3	5	5	5	5	3
4	2	3	1	4	2	1	2	4	3	1	4	1	3	2	4	3	1	4	1	1	4	5	4	6	6	3
4	2	4	2	4	2	3	2	4	4	4	4	1	3	4	4	4	2	4	2	3	5	5	6	6	6	5
4	2	4	2	4	2	3	2	4	4	4	4	1	3	4	4	4	2	4	2	3	5	5	6	6	6	5
					0	0	0	0
4	2	3	2	3	1	1	1	4	4	2	4	1	3	2	4	3	1	4	1	2	4	5	5	5	5	3
5	2	3	2	3	1	1	2	4	4	3	4	2	4	3	4	4	3	5	2	2	4	6	5	6	6	6
4	3	4	4	2	1	1	2	2	2	2	4	1	1	2	4	4	2	4	1	4	4	1	3	3	3	1
5	2	4	4	5	1	2	2	4	5	2	5	1	4	3	4	5	2	3	2	4	4	6	5	4	5	2
4	3	3	3	4	2	2	4	5	4	3	2	1	5	3	5	3	1	2	2	3	3	2	6	2	2	3
5	1	2	1	2	1	1	1	4	2	2	3	1	1	1	2	4	1	4	1	2	4	6	6	6	6	3
4	1	4	2	4	2	2	1	4	5	2	4	2	5	3	5	3	2	4	2	2	4	6	7	7	6	7
4	1	4	2	4	2	2	1	4	5	2	4	2	5	3	5	3	2	4	2	2	4	6	7	7	6	7
3	1	4	1	3	1	1	1	5	4	1	4	1	3	1	3	3	1	3	1	1	5	5	5	6	3	5
3	2	3	4	3	2	2	1	4	3	3	3	2	3	2	3	3	2	3	3	2	3	5	5	5	6	3
4	1	3	2	4	1	1	2	4	5	3	3	1	3	2	3	4	1	4	1	2	4	4	7	6	6	6
3	3	2	3	2	1	1	1	2	2	4	4	1	2	2	3	1	3	2	1	3	3	1	1	3	5	4
4	1	5	2	3	2	1	1	4	2	2	3	1	2	1	3	4	2	3	1	2	4	5	6	5	5	2
4	1	5	2	3	2	1	1	4	2	2	3	1	2	1	3	4	2	3	1	2	4	5	6	5	5	2
3	2	2	1	4	1	1	1	3	3	2	3	1	4	3	4	3	1	2	1	1	3	4	4	4	4	1
3	2	3	2	3	1	1	4	4		2	4	2	3	1	4	1		4	1	2	4	6	6	5	6	2
4	1	3	1	3	1	1	1	3	3	2	4	1	4	2	5	5	1	5	1	1	4	6	6	6	7	6
4	1	3	1	3	1	1	1	3	3	2	4	1	4	2	5	5	1	5	1	1	4	6	6	6	7	6
4	2	3	2	3	1	1	1	3	3	2	3	1	3	1	3	4	1	3	1	2	4	6	5	6	5	6
3	2	2	2	3	1	1	1	3	2	2	3	2	3	2	3	3	1	4	1	2	3	2	6	5	5	2
4	2	3	2	3	1	4	1	4	4	1	3	1	3	4	2	4	2	3	4	2	5	6	7	7	5	7
					0	0	0	0
4	2	3	3	3	2	3	1	4	4	2	3	2	4	3	4	4	2	3	2	1	5	6	6	6	6	6
3	2	4	3	4	2	2	3	4	5	1	4	1	4	1	4	4	1	5	2	1	5	6	6	6	7	4
3	4	2	3	2	4	3	2	3	2	4	2	3	2	4	2	3	4	2	3	2	2	3	4	3	5	3
4	1	2	1	4	2	1	1	4	4	1	4	1	3	1	3	4	1	5	1	2	5	5	5	5	5	1
4	2	4	3	4	1	2	1	4	4	2	4	1	3	2	3	3	2	4	2	2	4	6	6	5	6	5
5	3	5	4	4	4	4	2	5	4	3	4	4	4	4	5	5	4	4	4	5	5	6	4	6	7	3
5	2	4	2	4	2	1	2	5	4	2	5	2	5	2	5	4	1	4	1	2	5	6	6	6	6	4
4	2	4	2	5	3	2	1	5	3	1	3	1	2	2	3	3	2	3	1	2	4	6	5	6	6	5
4	2	4	2	5	3	2	1	5	3	1	3	1	2	2	3	3	2	3	1	2	4	6	5	6	6	5
4	2	4	1	5	2	1	1	4	4	1	4	1	4	1	4	4	1	5	1	1	4	6	7	6	6	7
5	1	3	1	4	1	1	1	4	3	2	4	1	5	1	5	4	1	4	2	1	5	6	6	6	7	3
4	1	3	1	2	1	1	1	5	4	1	4	1	4	1	3	4	1	4	1	1	5		3	6	7	7
4	1	2	2	4	2	1	1	3	2	2	4	1	2	2	4	4	2	4	1	2	3	6	6	6	7	6
4	1	2	2	4	2	1	1	3	2	2	4	1	2	2	4	4	2	4	1	2	3	6	6	6	7	6
4	2	3	2	3	3	3	2	4	3	2	4	2	4	2	4	4	2	4	2	2	4	5	5	5	5	3
5	3	5	2	4	1	1	1	4	5	2	5	1	4	2	4	4	2	5	2	2	4	5	5	3	5	2
4	2	4	2	5	2	1	1	4	3	2	2	2	3	3	4	3	2	3	1	2	4	6	6	6	7	7
4	2	3	2	5	1	3	2	4	5	2	4	1	3	4	5	4	3	4	3	2	5	6	6	6	6	5
5	1	5	1	4	1	2	1	5	3	2	4	1	5	1	5	4	1	4	1	1	5	7	7	7	6	7
5	2	4	3	3	2	1	1	5	4	2	4	2	5	2	5	5	1	5	1	2	5	6	6	6	6	6
4	1	3	4	3	1	2	2	4	4	2	4	1	4	2	4	4	2	3	2	2	4	6	6	7	7	6
4	1	4	1	4	1	2	1	4	3	1	3	1	4	1	4	4	1	4	1	1	4	7	7	7	1	2
4	1	4	1	3	1	1	1	3	4	2	3	1	3	2	4	3	1	3	1	1	4	6	6	6	6	5
4	2	5	2	4	1	3	1	5	2	2	4	2	5	3	5	5	4	5	3	2	4	7	7	7	7	7
4	1	3	2	4	1	1	2	4	5	3	3	1	3	2	3	4	1	4	1	2	4	4	7	6	6	6
4	1	3	1	4	4	2	1	5	4	1	4	2	5	2	5	4	1	4	1	1	3	5	5	5	5	2
4	2	4	2	4	1	1	1	5	4	1	4	1	4	2	5	5	1	5	1	2	4	6	5	6	6	5
5	5	5	5	4	4	3	3	3	3	4	2	2	2	3	3	3	4	4	4	4	5	6	4	5	1	1
4	2	3	4	4	1	1	2	4	4	3	3	1	4	4	4	3	2	3	2	3	4	5	6	6	5	4
4	2	4	2	3	2	1	1	5	4	3	4	1	3	3	4	4	1	4	1	2	5	6	7	6	6	3
4	4	3	4	2	4	2	3	3	2	4	2	2	3	4	4	3	4	2	2	3	3	2	5	3	6	3
3	1	2	1	1	2	1	1	3	2	1	2	2	3	2	3	2	1	2	2	2	3	3	5	5	4	2
4	2	2	2	4	2	1	4	3	4	3	4	1	3	3	4	4	3	3	1	3	3	3	4	4	3	3
4	2	2	2	2	2	1	2	2	3	3	2	2	2	2	3	3	2	2	1	3	3	3	5	2	2	2
4	2	2	2	2	2	1	2	2	3	3	2	2	2	2	3	3	2	2	1	3	3	3	5	2	2	2
3	2	4	1	4	1	1	1	4	3	1	3	1	4	2	4	4	2	4	1	2	4	6	5	6	6	6
4	1	3	1	2	1	3	3	3	2	2	3	1	4	4	4	3	1	4	2	2	3	5	6	5	5	2
5	1	3	3	4	1	1	2	5	4	2	4	1	4	2	4	4	1	3	2	2	4	6	6	6	6	6
3	2	3	2	3	1	1	1	3	3	2	3	1	4	2	4	4	1	4	1	2	4	2	5	5	5	3
2	3	2	2		4	2	2	2	3	2	2	2	2	2	3	3	1	3	2	4	3	5	5	5	5	5
3	3	2	4	2	4	3	3	2	3	4	2	2	3	2	2	2	1	1	2	4	3	6	6	3	6	1
5	1	4	2	4	1	1	1	4	3	1	4	1	4	1	5	4	1	5	1	1	4	6	6	6	6	4
4	1	2	3	1	1	1	1	3	3	2	3	1	4	3	3	4	1	3	1	3	4	6	7	6	5	3
4	1	4	1	4	1	1	1	4	4	1	5	1	4	1	4	5	1	5	1	1	5	5	4	6	6	3
4	2	3	4	3	4	2	2	3	2	3	3	5	3	2	3	3	2	3	3	5	3	2	4	2	1	1
3	1	3	1	3	1	1	1	4	4	1	4	1	3	1	4	4	1	4	1	1	4	6	7	6	6	6
3	1	3	1	4	1	1	2	4	5	2	3	1	3	3	4	3	2	4	2	2	4	6	6	6	5	6
3	3	4	2	1	2	3	1	3	2	3	4	1	3	2	2	4	1	3	2	2	5	4	6	6	2	3
4	3	4	3	4	1	1	2	4	4	3	3	1	4	1	4	4	1	3	1	3	4	5	5	5	6	4
5	1	3	1	3	1	1	1	4	4	1	4	1	3	1	4	3	4		1	1	4	6	6	6	7	3
3	2	4	3	4	1	1	1	4	4	2	4	1	3	2	4	4	2	3	1	3	3	2	6	3	5	3
3	2	4	3	4	1	1	1	4	4	2	4	1	3	2	4	4	2	3	1	3	3	2	6	3	5	3
4	1	4	1	4	1	1	1	4	4	3	4	1	4	3	5	4	2	5	2	2	4	6	6	6	7	3
5	2	3	2	3	1	2	1	4	4	2	3	1	4	3	4		1	3	1	2	4	5	6	6	4	3
4	2	3	2	3	2	2	1	3	3	2	4	2	4	4	3	4	3	2	3	2	4	2	1	2	2	5
4	1	3	1	3	1	2	2	4	3	2	3	2	5	2	3	3	1	4	2	2	3	6	6	6	6	6
4	2	3	1	5	1	1	2	3	3	1	4	1	4	2	4	5	1	4	1	3	5	5	7	6	6	3
4	2	4	2	4	1	2	2	4	4	2	4	1	4	2	5	5	1	4	2	2	4	6	5	7	7	5
4	2	4	2	4	2	1	2	4	4	2	4	2	4	2	4	4	1	4	2	2	4	7	6	7	6	6
5	3	3	2	3	2	2	1	3	3	2	2	1	4	2	5	2	1	1	1	2	4	5	6	6	7	5
4	1	4	1	5	1	1	1	5	3	2	4	1	4	1	5	4	1	5	1	1	4	6	6	6	6	6
4	1	4	3	3	1	2	2	5	4	3	5	1	4	1	5	4	1	5	1	2	3	5	5	6	5	2
4	2	3	2	4	1	1	1	4	3	1	3	1	4	1	4	4	2	3	1	1	3	6	6	6	6	5
4	2	3	2	4	1	1	1	4	3	1	3	1	4	1	4	4	2	3	1	1	3	6	6	6	6	5
4	2	4	3	3	1	1	1	4	3	2	2	1	3	2	3	4	2	4	2	3	3	4	5	5	3	3
4	2	4	3	3	1	1	1	4	3	2	2	1	3	2	3	4	2	4	2	3	3	4	5	5	3	3
4	2	4	3	4	2	2	2	4	4	4	3	2	4	3	4	3	2	4	2	2	4	6	6	6	6	5
4	2	4	2	3	3	2	1	4	3	1	3	3	4	3	4	4	1	3	2	2	4	6	6	6	6	5
4	2	3	3	3	3	3	3	3	3	3	3	3	3	3	3	3	3	3	3	3	3	3	4	6	5	6
4	2	5	3	4	3	2	2	4	4	3	2	1	2	2	5	4	1	2	2	3	4	3	6	3	5	6
3	3	3	3	4	3	2	2	4	4	4	4	1	3	3	5	4	2	4	2	2		5	7	6	5	5
4	1	4	2	4	1	1	1	4	4	2	5	1	4	1	5	4	1	5	1	1	4	7	7	7	7	3
4	3	3	2	5	1	2	1	5	4	4	4	1	5	2	4	4	3	4	2	3	4	2	4	6	6	6
3	2	2	2	2	2	2	1	3	2	1	3	2	3	1	3	3	1	2	1	1	3	4	4	6	4	3
4	2	3	2	4	1	1	2	4	5	2	5	3	4	3	4	5	1	4	1	2	4	6	7	6	6	6
4	2	4	2	3	1	3	1	4	4	2	3	2	3	4	4	4	4	3	3	2	4	6	7	6	6	1
4	2	4	3	4	2	2	2	4	5	2	4	2	5	2	4	4	1	5	1	2	5	6	7	7	6	1
5	1	5	1	4	1	1	1	5	4	1	5	1	5	1	4	4	1	4	1	1	5	6	7	7	7	6
4	1	3	2	4	3	3	1	4	4	2	3	1	4	3	4	4	2	2	2	2	3	7	7	7	7	7
4	1	4	2	3	2	2	1	4	4	3	3	1	4	3	3	5	1	3	2	1	4	6	7	6	5	5
3	5	5	4	3	1	1	1	4	4	4	4	2	4	4	5	3	3	2	1	3	3		7	7	7	3
3	4	3	4	5	4	4	2	3	4	4	4	1	2	4	3	3	4	3	3	4	4		6	5	3	5
4	2	3	2	4	1	2	1	4	4	3	3	1	4	3	4	3	1	2	2	3	3	6	5	6	6	2
5	1	4	2	4	2	2	1	5	4	2	1	5	1		5	5	1	5	1	1	5	6	6	6	6	2
4	1	3	1	3	1	1	1	4	4	2	4	1	3	1	3	4	1	4	1	1	4	6	6		6	5
4	1	4	1	4	2	4	1	4	4	2	4	1	5	1	4	3	2	4	3	2	5	6	7	7	7	7
4	2	4	3	4	3	3	2	3	3	4	5	1	1	5	4	5	4	3	2	2	4	4	5	4	5	3
4	3	4	2	3	2	2	1	3	4	3	3	1	3	2	3	3	1	4	2	1	4	6	7	7	6	6
4	3	1	2	1	1	2	1	2	3	2	2	2	4	3	2	1	1	2		3	1	3	4	3	4	6
4	1	3	1	3	2	1	1	3	3	2	3	2	3	2	3	4	1	3	1	2	4	4	3	5	3	2
4	1	3	1	4	2	1	1	4	4	2	4	1	4	1	4	4	1	4	1	1	5	3	6	5	5	2
4	3	3	2	3	2	2	2	4	3	3	3	2	4	3	4	3	2	2	2	2	4	5	6	6	5	5
4	3	3	2	3	2	2	2	4	3	3	3	2	4	3	4	3	2	2	2	2	4	5	6	6	5	5
4	1	3	1	3	2	1	1	3	3	2	3	2	3	2	3	4	1	3	1	2	4	4	3	5	3	2
4	2	4	2	3	2	2	2	4	4	3	4	1	4	4	4	4	2	3	2	2	4	6	5	5	6	3
4	2	3	2	4	3	2	2	4	3	2	4	2	4	2	4	4	2	4	2	2	4	3	2	2	2	2
4	3	4	3	2	1	4	1	3	2	4	3	1	2	4	4	3	3	3	4	3	3	5	6	3	3	6
4	2	2	1	4	2	1	2	3	4	3	2	1	3	2	3	3	1	2	1	3	4	5	5	6	3	3
4	2	2	1	4	2	1	2	3	4	3	2	1	3	2	3	3	1	2	1	3	4	5	5	6	3	3
3	2	2	2	2	1	2	3	3	2	2	3	1	3	3	4	4	3	3	2	2	2	3	3	3	3	3
4	1	3	2	2	1	1	3	4	3	2	3	1	2	2	4	3	3	3	2	3	3	5	3	3	3	1
4	2	2	2	3	2	2	1	3	4	1	5	2	4	2	3	5	1	3	1	1	3	4	2	3	4	2
4	4	3	3	2	4	5	1	2	2	3	4	2	1	5	2	3	4	3	4	4	2	2	3	2	3	2
4	3	4	2	3	2	2	1	3	4	3	3	1	3	2	3	3	1	4	2	1	4	6	7	7	6	6
4	3	1	2	1	1	2	1	2	3	2	2	2	4	3	2	1	1	2		3	1	3	4	3	4	6
4	2	3	2	3	3	4	2	3	4	4	2	4	2	5	5	3	3	2	3	2	4	7	6	7	7	4
4	1	1	1	2	1	2	1	3	3	1	3	2	2	3	4	3	3	2	2	2	3	6	5	6	6	6
3	1	3	3	3	1	1	1	4	3	2	2	2	2	2	3	3	1	3	1	3	3	5	6	6	6	5
4	1	3	2	4	2	2	3	3	4	4	4	2	3	2	4	4	2	4	2	2	4	6	6	6	6	5
4	1	3	1	2	1	1	1	3	2	1	3	1	4	2	4	3	1	4	1	1	4	6	6	7	6	5
4	2	4	3	4	3	3	2	3	3	4	5	1	1	5	4	5	4	3	2	2	4	4	5	4	5	3
4	2	4	1	5	2	2	1	4	2	1	4	1	3	1	4	2	1	3	1	2	4	6	6	6	5	7
4	2	4	1	5	2	2	1	4	2	1	4	1	3	1	4	2	1	3	1	2	4	6	6	6	5	7
4	2	4	2	4	1	1	1	4	5	2	3	1	4	1	4	4	1	2	1	1	5	1	1	1	1	1
4	2	4	1	4	1	1	1	3	3	2	4	1	3	1	4	4	1	3	1	1	4	2	3	4	3	2
1	3	2	2	3	1	4	3	5	5	3	3	4	4	3	4	4	3	4	2	5		5	5	5	6	1
3	2	2	2	1	1	1	1	2	2	3	3	1	2	3	2	2	3	3	3	2	3	6	6	6	6	5
3	2	2	2	1	1	1	1	2	2	3	3	1	2	3	2	2	3	3	3	2	3	6	6	6	6	5
4	4	2	4	2	1	4	2	3	3	2	4	1	3	4	4	3	2	4	4	2	4	4	5	3	6	3
4	2	3	2	4	1	1	1	3	3	1	4	1	3	2	3	4	2	3	1	3	3	3	2	2	4	4
4	2	3	2	4	1	1	1	3	3	1	4	1	3	2	3	4	2	3	1	3	3	3	2	2	4	4
4	2	3	2	1	2	1	2	3	1	4	2	2	3	4	2	3	2	2	2	2	3	2	3	4	5
4	1	4	2	4	2	2	1	4	4	2	4	1	4	2	4	4	1	5	1	2	5	6	5	6	4	4
4	1	3	1	4	1	2	1	4	4	1	5	1	5	1	4	4	1	4	1	1	4	7	7		7	5
4	1	4	1		1	1	2	4	4	2	4	1	4	1	4	4	1	3	1	2	4	6	6	6	7	6
4	2	3	2	3	2	2	2	3	3	2	4	1	3	2	4	4	2	3	2	2	4	4	6	6	6	5
4	1	4	1	4	1	1	1	4	3	1	4	1	4	2	4	4	1	3	1	1	4	6	6	6	6	6
3	1	4	2	3	2	1	1	3	3	2	3	2	3	1	4	3	1	4	1	2	4	7	6	7	6	6
3	1	4	1	4	1	2	1	4	5	2	3	2	4	2	4	4	1	3	2	2	4	7	7	7	7	7
3	1	1	1	3	1	1	1	3	4	2	2	1	2	2	4	3	1	4	1	1	4	7	7	7	7	1
3	1	3	1	1	1	1	1	3	1	1	3	1	3	2	3	3	1	3	1	1	4	6	6	6	6	6
4	1	4	2	4	1	1	1	4	5	1	5	1	4	1	4	4	1	4	1	2	5	7	7	7	7	7
5	2	3	2	3	1	1	1	4	4	3	4	1	4	3	3	4	1	3	1	3	3	6	6	6	7	5
5	1	4	1	5	1	1	1	4	5	1	4	1	4	1	5	4	1	4	1	1	5	5	5	7	6	6
4	1	4	2	4	1	1	1	4	5	1	4	1	4	1	4	4	1	5	1	1	5		7	7	7	6
4	1	4	2	5	2	1	2	4	4	3	5	1	4	2	5	4	1	4	2	1	5	6	7	7	7	6
5	1	4	1	4	2	1	1	5	5	1	5	1	4	1	5	5	1	5	1	2	5	5	5	6	6	4
4	3	4	3	2	3	2	1	5	3	2	3	2	4	2	4	4	2	4	2	2	4	5	5	6	5	5
4	1	3	1	3	1	1	1	3	1	2	4	1	3	1	3	3	1	3	1	1	4	6	7	7	7	6
4	2	3	2	3	1	1	1	4	3	2	3	1	3	2	3	3	2	4	1	2	4	6	6	6	6	7
5	2	4	2	4	1	2	2	4	3	2	5	1	4	2	4	5	2	4	1	3	4	5	6	5	6	3
5	2	4	2	4	1	2	2	4	3	2	5	1	4	2	4	5	2	4	1	3	4	5	6	5	6	3
3	2	4	1	4	1	1	1	5	4	1	5	1	4	2	5	5	1	4	2	2	4	6	6	5	6	5
5	1	4	2	3	1	1	1	5	5	2	4	1	4	2	5	5	2	4	1	2	5	4	4	5	5	2
4	1	3	2		1	1	1	3	5	3	3	1	5	3	4	3	2	3	1	2	5	6	6	6	6	6
4	1	3	2		1	1	1	3	5	3	3	1	5	3	4	3	2	3	1	2	5	6	6	6	6	6
4	2	4	2	5	2	1	2	4	3	2	4	1	5	2	4	5	2	4	1	2	4	5	5	6	6	3
5	1	4	1	3	2	2	2	4	3	2	4	2	4	1	5	4	1	4	2	2	4	7	7	7	7	4
4	2	4	1	3	1	4	1	4	4	2	3	1	5	5	5	4	3	4	4	3	4	6	6	3	3	3
5	2	5	3	4	1	1	1	5	5	2	5	2	5	3	5	5	1	5	1	1	5	7	6	7	7	6
4	2	4	3	4	1	1	1	4	4	1	3	1	4	1	5	4	1	4	1	4	3	4	5	5	5	3
3	4	3	4	4	1	2	2	2	3	3	2	1	3	4	4	4	3	2	2	3	3	3	3	4	5	4
3	1	3	1	5	4	1	3	5	4	3	3	3	3	3	5	4	3	5	1	1	5	7	7	4	4	6
3	1	4	2	3	2	1	1	3	3	2	3	2	3	1	4	3	1	4	1	2	4	7	6	7	6	6
4	4	3	4	3	2	4	1	3	4	3	3	1	1	3	3	3	1	2	3	3	3		4	6	6	5
3	2	2	2	2	2	2	1	2	2	2	3	3	2	2	2	3	2	3	2	2	3	5	5	6	7	4
4	2	3	2	3	1	1	1	4	4	4	4	1	3	2	3	4	1	3	1	2	5	5	6	5	6	6
4	3	4	2	4	3	3	4	4	4	4	4	1	4	4	4	4	4	3	2	2	4	7	7	7	7	5
4	1	3	1	4	1	1	1	3	3	1	3	1	3	2	4	4	1	5	1	1	5	6	6	7	6	6
4	1	2	1	2	1	1	1	4	3	2	3	1	3	2	3	3	2	3	1	1	3	6	6	6	6	4
4	1	3	1	3	1	1	1	3	3	1	3	1	3	1	3	3	1	3	1	2	4	4	4	6	6	3
3	1	3	2	1	2	2	2	3	3	3	1	2	1	2	3	2	1	2	1	1	4	6	3	6	4	5
4	2	3	2	4	2	2	1	3	4	1	3	1	3	1	3	4	1	4	1	1	4	6	6	6	6	6
4	1	3	1	3	1	1	1	3	3	1	3	1	3	1	3	3	1	3	1	2	4	4	4	6	6	3
3	2	3	2	2	2	2	1	3	2	3	2	2	2	2	2	3	2	3	2	2	3	3	5	5	6	5
4	1	3	1	4	1	1	1	4	3	2	4	2	3	2	4	3	1	4	1	2	5	6	6	6	6	5
4	2	3	2	3	1	1	1	4	4	4	4	1	3	2	3	4	1	3	1	2	5	5	6	5	6	6
4	1	2	1	3	1	1	1	4	4	2	4	1	4	1	4	4	1	4	1	2	4	5	5	5	4	3
4	1	2	1	3	2	2	2	3	3	2	3	2	3	2	4	4	2	4	2	2	4	6	5	6	6	3
4	3	2	1	3	1	2	1	2	3	3	2	2	2	2	3	3	1	2	2	1	3	5	7	5	7	2
3	1	2	1	4	1	1	1	4	1	1	5	1	2	1	5	5	1	4	1	1	4	6	6	6	6	5
4	2	2	1	3	1	1	1	3	4	3	3	1	3	3	4	2	2	2	1	1	4	5	3	5	3	6
4	1	3	1	3	2	1	1	3	3	3	2	2	3	3	3	3	1	3	1	1	4	6	6	6	6	3
3	2	3	2	4	1	1	2	4	4	4	4	1	4	2	5	4	1	2	1	3	4	2	3	3	4	5
5	1	4	2	5	1	1	1	3	3	1	3	1	3	1	4		1	4	1	1	4	6	7	6	6	6
4	1	2	1	2	1	1	1	4	3	2	3	1	3	2	3	3	2	3	1	1	3	6	6	6	6	4
5	1	3	1	4	1	2	1	5	4	2	3	1	4	2	4	4	1	5	1	1	4	7	6	6	6	4
3	2	1	2	4	2	1	1	3	4	3	4	1	3	1	4	4	1	4	1	1	4	6	7	6	6	6
3	2	1	2	4	2	1	1	3	4	3	4	1	3	1	4	4	1	4	1	1	4	6	7	6	6	6
5	1	4	1	3	1	2	1	4	4	2	4	2	4	2	4	4	1	3	2	2	4	6	6	6	7	3
3	4	3	2	2	1	2	1	3	3	2	4	1	2	5	3	3	2	2	1	1	3	3	5	6	4	6
4	2	3	1	3	2	1	2	4	3	2	2	1	3	2	3	3	1	3	1	1	3	2	4	5	5	3
4	2	4	2	4	2	2	2	4	4	2	4	1	5	2	4	4	2	4	2	2	4	7	7	7	6	6
4	1	4	2	3	1	1	1	5	4	1		1	4	1	4		1	4	1	2	4	6	6	6	6	7
4	2	4	2	3	2	2	2	5	4	2	5	2	5	2	5	4	2	5	2	2	4	5	6	6	6	4
5	2	4	3	5	1	2	2	4	2	3	4	5	2	2	4	4	1	5	1	1	4	7	6	6	7	6
5	1	3	1	5	1	1	1	5	5	1	4	1	5	2	5	4	1	5	1	3	5		7	6	7	4
3	1	2	1	4	2	1	1	3	2	2	2	1	3	2	4	4	1	2	1	1	4	5	7	6	6	6
4	2	3	2	4	1	1	1	3	1	1	4	1	3	1	4	4	1	3	1	2	4	6	6	6	7	5
4	1	3	1	3	1	1	1	4	3	2	3	1	3	2	3	4	1	3	1	2	4	4	5	6	6	2
4	2	3	2	3	1	2	2	4	2	2	3	1	4	2	3	3	2	3	2	2	3	2	2	3	3	3
4	2	3	2	3	1	2	2	4	2	2	3	1	4	2	3	3	2	3	2	2	3	2	2	3	3	3
5	2	4	2	5	2	2	1	5	3	3	5	1	5	1	5	5	4	5	1	1	5	6	6	6	5	3
4	2	3	1	3	1	1	1	3	3	2	4	1	3	1	3	3	1	3	1	2	4	3	3	5	5	3
4	2	4	2	3	2	2	1	4	2	2	4	2	4	2	4	4	1	4	2	1	4	5	6	6	5	5
5	2	4	2	4	1	1	1	4	5	2	4	2	5	2	5	5	2	5	2	1	5	5	6	6	5	6
5	2	4	2	4	5	2	2	5	5	5	5	5	5	2	5	5	2	5	2	4	4	6	6	6	6	6
4	1	3	1	3	1	1	1	3	3	2	3	1	3	2	3	4	2	1	1	1	3	5	5	6	6	4
4	4	3	2	3	2	1	1	3	3	2	4	2	4	2	4	4	1	3	1	2	3	3	3	3	5	3
5	1	3	1	4	1	1	1	5	4	1	5	1	3	1	4	5	1	5	1	1	5	6	6	6	6	6
4	2	3	2	3	1	1	1	4	3	2	3	1	3	1	4	4	1	4	1	2	3	2	6	4	5	3
4	2	3	2	3	1	1	1	4	3	2	3	1	3	1	4	4	1	4	1	2	3	2	6	4	5	3
5	2	4	2	4	2	3	1	5	3	3	4	2	4	3	5	5	2	4	2	2	4	6	6	6	6	6
4	1	3	1	3	1	1	1	4	4	1	4	1	4	2	3	4	2	2	1	1	4	3	2	3	5	1
4	2	2	2	3	1	2	2	4	3	2	4	1	2	2	2	4	1	2	1	1	3	5	5	5	3	3
4	2	4	1	4	1	2	1	5	4	1	4	1	4	2	4	4	1	5	2	1	5	3	4	3	3	6
5	2	4	2	4	1	3	1	5	4	2	4	1	4	3	5	4	2	4	3	2	5	6	6	6	3	7
4	2	3	2	3	1	2	1	4	3	2	4	1	4	2	4	4	1	4	1	1	4	6	6	6	6	5
4	4	3	3	2	3	2	1	3	2	3	4	2	3	4	3	3	3	3	2	2	3	3	3	6	2	1
4	3	3	3	2	2	4	1	3	3	2	4	2	5	4	4	5	2	3	2	2	4	6	6	7	6	5
4	2	4	2	3	2	3	1	3	2	2	3	1	4	2	3	3	1	2	2	2	4	5	6	6	6	5
3	1	4	4	1	1	1	1	4	2	3	4	1	1	3	4	4	4	2	3	4	4	5	6	5	2	3
4	2	5	1	3	2	1	1	5	2	3	4	2	3	3	3	4	2	4	1	3	3	5	6	6	5	2
3	2	3	1	3	2	2	1	4	1	3	2	1	3	2	4	4	2	2	1	2	3	5	6	6	5	5
5	1	5	1	5	2	3	1	5	5	1	4	1	5	2	5	5	2	2	1	1	5	6	4	6	3	4
3	1	1	1	4	1	1	1	4	5	2	3	1	4	1	1	4	1	4	1	1	4	6	6	6	6	6
5	1	4	1	5	1	1	1	5	5	1	5	1	4	1	5	5	1	4	1	1	4	1	5	6	6	2
5	1	5	1	5	1	1	1	5	3	1	5	1	5	2	5	5	1	5	1	2	4	6	7	6	6	6
4	2	4	2	4	1	3	1	4	4	2	4	1	4	2	4	4	2	4	1	2	4	6	6	6	6	5
3	2	3	2	3	2	2	2	3	2	2	2	2	3	2	3	3	2	3	2	2	3	5	7	5	5	2
3	2	3	2	3	2	2	2	3	2	2	2	2	3	2	3	3	2	3	2	2	3	5	7	5	5	2
2	1	1	1	2	1	1	1	2	3	3	3	1	1	1	2	1	1	2	4		1	1	2	2	5	1
3	1	1	1	1	2	1	1	2	2	2	3	1	2	2	2	3	1	2	1	3	3	3	6	5	4	5
3	1	1	1	1	2	1	1	2	2	2	3	1	2	2	2	3	1	2	1	3	3	3	6	5	4	5
3	3	3	2	4	1	1	1	3	3	1	4	3	3	1	3	3	2	4	1	1	4	5	6	5	5	4
3	2	3	2	4	1	1	2	3	4	3	3	1	3	2	4	3	2	2	1	1	4	5	6	6	5	5
4	1	3	1	4	1	1		4	4	1	4	1	3	2	4	4	1	4	1	2	4	5	5	5	6	2
3	4	3		3	2	3	4	3	4	4	2	2	4	4	4	3	2	2	4	2	3	3	2	5	1	2
4	2	3		3	2	2	4	3	4	3	4	2	4	3	4	4	2	3	2	3	4	2	2	3	4	2
4	2	3		3	2	2	4	3	4	3	4	2	4	3	4	4	2	3	2	3	4	2	2	3	4	2
4	1	3	2	3	1	1	1	4	4	2	4	1	3	1	5	4	1	5	1	1	4	6	5	6	6	3
4	3	3	3	4	1	2	1	3	5	2	4	1	3	2	3	3	1	3	2	2	4	3	5	5	6	2
4	1	4	2	3	1	1	1	5	5	1	4	1	4	2	4	4	2	4	1	2	5	7	7	7	7	6
4	2	2	1	3	2	1	1	2	2	1	2	1	1	2	2	3	1	2	1	1	4	6	6	6	6	6
4	2	3	4	4	2	2	2	4	4	4	4	1	1	2	4	4	2	4	2	2	4		6	5	5	2
4	1	3	1	3	1	1	1	4	5	1	4	1	4	2	5	5	1	5	1	1	4	6	5	6	6	5
4	3	3	2	5	2	1	1	4	4	1	4	1	2	2	5	4	3	4	2	1	4	4	5	6	6	5
3	4	2	3	2	1	2	1	3	3	3	3	2	3	4	3	4	1	3	2	2	3	3	4	3	5	2
4	2	4	1	2	1	1	1	4	3	2	3	1	3	2	4	3	1	2	1	1	2	5	5	5	2	2
4	1	4	1	4	3	1	1	3	3	2	3	1	3	1	3	3	1	3	1	1	4	4	6	4	4	2
4	2	3	2	1	1	2	1	4	2	2	3	1	3	3	4	3	2	1	2	1	4	5	6	6	2	2
4	2	4	2	4	1	1	1	4	4	3	4	2	4	2	4	4	1	5	1	2	4	6	7	6	6	3
4	3	3	2	5	1	2	1	3	5	3	5	1	3	2	5	5	2	4	2	3	3	5	5	6	5	3
4	3	3	3	3	2	2	2	4	2	3	3	2	3	2	4	4	2	3	2	2	3	5	5	4	5	2
4	2	3	1	3	1	2	1	3	3	2	3	1	3	2	3	2	2	2	2	2	4	6	6	7	7	7
4	1	4	2	4	1	2	1	4	4	2	4	1	5	2	4	4	2	3	2	2	5	6	7	7	6	6
3	1	3	1	4	1	1	1	4	1	1	4	1	4	1	4	4	1	4	1	2	4	6	6	7	7	2
4	4	3	2	4	3	3	1	4	4	3	4	2	4	4	4	4	2	4	2	3	4	5	6	6	7	7
4	1		2	4	1	2	2	4	2	2		1	2	3	3	2	1	2	2	2	5	6	6	6	6	7
5	1	4	1	4	1	1	1	4	4	1	4	1	4	1	4		1	3	1	1	4	6	6	6	6	6
5	3	4	3	2	2	2	2	5	3	3	2	2	3	4	4	3	3	2	4	3	4	6	5	5	4	3
4	2	2	2	2	2	1	1	3	1	2	2	2	3	2	3	4	2	3	1	3	4	3	2	5	5	3
3	4	3	3	2	4	4	1	4	4	3	4	3	4	4	3	3	4	2	4	3	4	3	5	5	5	2
5	1	4	2	4	1	1	1	4	5	2	4	1	5	2	4	4	1	4	2	2	4	7	7	7	7	6
4	2	4	2	4	1	1	2	5	4	1	4	1	4	1	5	5	1	5	1	1	4	5	5	5	6	6
4	1	3	1	4	1	1	2	4	4	2	4	1	4	2	5	4	2	4	1	2	4	5	5	6	5	3
3	1	2	2	3	2	1	1	3	3	2	3	1	3	4	4	4	1	3	1	1	4	5	6	5	7	6
3	1	2	2	3	2	1	1	3	3	2	3	1	3	4	4	4	1	3	1	1	4	5	6	5	7	6
3	3	4	4	4	3	3	3	4	4	4	5	1	3	3	4	3	2	3	4	2	4	5	5	6	6	3
5	2	3	1	4	1	1	1	4	4	1	5	1	4	1	5	5	1	5	1	1	4	6	6	6	6	7
5	1	3	1	4	1	1	1	4	2	2	4	1	4	1	4		1	3	1	2	4	6	6	6	6	3
3	4	3	4	5	1	2	1	3	4	2	4	2	4	4	4	4	2	3	2	3	3	4	4	6	5	4
4	1	3	2	4	2	2	1	5	5	1	4	1	4	3	5	5	2	4	1	2	5	6	6	6	6	5
5	1	4	3	5	1	1	1	5	5	2	4	1	5	2	5	5	1	5	1	1	5	6	7	6	7	3
4	1	4	2	4	1	2	1	5	4	2	3	1	5	3	4	4	1	4	2	2	5	6	5	6	6	3
4	3	3	3	4	2	1	3	4	1	3	4	1	3	1	5	3	1	3	1	2	4	4	6	5	5	3
3	2	4	3	3	1	2	1	4	5	3	5	1	4	4	4	3	1	3	2	2	5	7	7	7	6	6
4	2	3	2	3	2	2	1	4	3	3	3	1	4	2	4	4	2	3	2	2	4		5	6	6	6
5	1	5	2	4	1	1	1	5	3	2	4	1	5	3	5	5	2	4	2	2	5	6	6	7	5	6
4	1	4	2	3	1	1	1	5	5	1	4	1	4	2	4	4	2	4	1	2	5	7	7	7	7	6
4	2	3	3	4	1	2	2	4	2	3	4	1	4	3	5	4	2	3	2	2	4	5	7	6	6	6
5	2	4	1	5	2	2	2	4	4	2	4	2	4	2	5	3	2	5	2	1	4	5	6	6	5	5
4	1	3	1	3	1	1	1	3	2	1	3	1	2	2	3	3	1	4	1	1	4	5	5	5	2	5
4	1	5	2	4	1	2	2	4	4	3	4	3	4	2	5	4	1	5	3	1	4	6	6	6	6	6
4	1	3	1	4	1	1	1	3	3	2	3	1	3	2	4	4	1	4	1	1	4	6	6		6	6
4	3	2	1	3	2	2	2	3	2	2	3	2	1	2	2	2	1	3	2	2	2	2	3	2	3	1
4	3	2	1	3	2	2	2	3	2	2	3	2	1	2	2	2	1	3	2	2	2	2	3	2	3	1
4	2	4	3	4	3	2	1	4	4	2	4	2	3	3	4	4	2	2	3	2	4	6	5	6	6	6
4	2	3	2	3	2	2	3	4	4	2	3	2	3	3	5	4	2	3	2	1	3	6	6	6	6	2
3	2	3	2	4	3	3	3	3	4	3	4	2	3	3	4	3	2	4	2	2	3	5	5	5	5	4
2	2	2	2	2	1	1	1	3	2	2	2	1	2	3	3	4	2	1	1	2	2	2	6	3	5	3
3	2	3	2	2	1	3	2	2	4	4	4	1	2	3	3	2	2	3	2	2	2	6	6	7	6	3
4	2	4	2	3	2	2	3	4	4	2	3	2	3	3	4	3	2	3	2	2	4	6	6	6	6	5
3	2	2	2	3	2	2	1	2	3	2	3	1	2	3	3	3	2	4	2	2	4		4	5	6	3
3	2	3	2	3	2	2	2	3	1	2	1	3	1	2	3	3	2	2	4	4	1	2	2	2	2	2
4	1	3	3	4	3	1	1	4	5	2	3	1	3	1	4	3	1	3	1	2	2	5	5	5	2	2
4	1		1																			6	6	6	6	5
4	1	3	1	4	1	2	1	4	4	1	5	1	4	1	4	4	1	5	1	1	5	3	6	4	3	2
4	1	3	2	4	1	1	2	5	4	3	4	1	4	1	4	4	1	4	1	1	4	6	6	7	6	2
4	3	3	3	3	2	3	1	4	3	1	4	2	3	3	4	4	2	5	2	4	3	6	6	7	6	1
2	2	2	3	3	2	1	1	3	2	4	4	2	3	2	3	2	2	3	1	2	1	1	3	2	1	4
4	2	3	2	3	1	1	1	4	3	2	4	1	3	1	4	4	1	5	2	3	4		6	6	6	5
3	2	2	2	2	1	1	1	3	2	2	3	2	3	2	3	3	1	3	1	2	3	5	6	6	3	3
4	1	3	1	3	1	1	1	3	4	1	4	1	3	1	3	4	1	3	1	1	4	5	5	5	5	3
3	1	2	1	3	1	1	1	3	2	1	4	1	3	3	3	3	1	3	3	1	3	6	4	6	6	2
4	2	3	2	4	1	1	1	3	3	2	4	1	4	2	3	3	1	3	1	2	3		3	3	3	3
4	1	4	1	3	1	1	1	4	4	4	4	1	4	2	3	4	2	3	1	2	4	6	6	7	7	6
4	2	4	2	4	2	2	2	4	4	2	3	2	3	3	4	3	2	4	2	2	5	5	6	6	6	5
3	1	2	1	3	1	1	1	3	3	1	3	1	3	1	3	3	1	3	1	1	3	6	6	7	7	5
4	2	3	2	4	2	1	1	4	3	3	3	1	3	2	4	3	1	4	1	2	4	6	7	6	7	6
4	1	3	2	3	1	2	2	4	3	2	4	1	3	3	4	4	3	4	1	1	4	5	5	6	6	6
5	1	4	1	5	1	1	1	5	5	2	5	1	5	1	5	5	1	4	1	1	5	7	7	6	7	7
3	2	4	1	3	1	2	1	4	4	2	2	2	3	3	3	3	3	4	2	2	3	6	6	6	5	6
4	3	4	3	3	2	2	1	4	5	2	4	2	4	3	4	4	1	4	2	3	4	6	6	6	6	6
4	2	3	2	5	1	2	1	5	4	2	5	1	3	2	5	4	2	3	2	1	4	6	5	6	6	6
5	1	5	1	5	1	1	1	5	4	1	4	1	5	1	4	3	1	4	1	1	5	7	7	7	7	7
4	1	3	2	3	2	2	3	4	2	1	4	2	4	2	4	3	2	3	2	2	4	6	7	7	7	2
5	3	5	2	4	4	3	2	5	5	2	4	3	5	4	5	4	1	3	3	2	4	5	6	6	5	5
4	1	3	1	3	1	1	1	3	2	1	3	1	2	2	3	3	1	4	1	1	4	5	5	5	2	5
4	1	4	1	3	3	2	1	4	3	1	4	2	3	2	3	4	1	4	2	2	4	3	3	5	6	3
4	1	2	1	3	1	1	1	3	2	3	3	1	3	2	4	4	1	3	1	1	4	2	6	4	5	1
4	1	3	3	3	1	1	1	4	5	2	3	1	4	1	3	3	1	3	2	4	4	6	6	6	7	6
4	1	3	2	3	1	1	1	3	4	2	3	1	4	2	4	3	1	4	2	2	4	5	4	5	5	2
4	2	3	2	4	1	2	1	4	4	1	4	1	3	1	4	4	1	3	1	1	4	4	4	5	4	3
3	4	3	4	2	3	3	1	3	3	2	3	1	3	5	3	3	2	2	4	3	3	2	6	5	3	5
4	1	4	1	4	1	1	1	4	4	2	4	1	4	1	4	4	1	4	1	1	4	6	6	6	6	5
4	1	3	2	4	1	1	1	3	4	4	4	1	3	2	4	4	1	4	1	2	4	5	5	6	5	3
4	1	3	2	4	1	1	1	3	4	4	4	1	3	2	4	4	1	4	1	2	4	5	5	6	5	3
4	3	4	4	5	3	3	3	5	3	2	5	4	5	4	4	4	1	5	4	5	5	5	3	7	5	6
4	2	3	1	4	1	1	1	4	4	1	5	1	3	2	4	4	1	4	1	1	5		6	7	7	6
4	2	3	2	4	3	1	1	3	4	2	3	1	4	2	4	3	2	2	1	2	5	6	7	7	7	6
4	1	4	2	3	1	3	1	4	4	1	3	1	4	3	4	5	1	4	1	1	5	7	7	7	7	7
4	1	3	2	4	1	1	1	4	2	2	4	1	3	3	5	4	2	5	3	2	4	3	2	2	5	3
4	1	4	2	4	1	1	1	4	5	1	4	1	5	2	4	4	2	4	1	1	5	6	6	7	6	6
5	1	5	1	5	2	1	1	5	5	1	4	1	5	1	5	5	1	5	1	1	5		6	6	7	6
5	1	5	1	5	1	1	1	5	5	2	5	1	5	2	5	5	1	5	1	1	5	7	7	7	7	7
4	1	4	2	4	1	1	1	4	4	2	4	1	4	2	4	4	1	4	1	2	4	6	6	6	7	7
4	3	2	3	1	1	1	1	3	2	2	2	1	1	3	4	3	1	3	1	4	3	3	3	3	6	2
3	4	3	4	3	4	4	1	4	4	2	5	4	4	5	3	4	5	4	4	4	4	3	5	3	6	2
3	1	2	1	3	1	1	1	3	2	1	4	1	3	3	3	3	1	3	3	1	3	6	4	6	6	2
4	1	3	1	2	3	1	1	4	4	1	3	1	3	3	3	3	1	2	1	1	4	6	5	6	5	6
4	5	4	5	3	3	4	3	3	2	4	2	3	4	5	3	3	4	2	4	5	3	2	3	2	3	3
3	2	1	1	1	1	1	1	1	1	3	2	2	1	1	2	2	2	1	1	2	2	2	2	2	5	4
4	1	3	1	4	1	1	1	4	4	2	4	1	3	2	4	4	2	4	1	1	4	6	7	7	7	6
4	2	3	2	5	2	2	1	4	3	2	3	2	5	3	4	5	2	5	1	1	2	3	3	5	2	1
3	4	2		2	4	4	1	2	2	3	1	2	4	5	4	4	4	2	4	3	3	3	3	3	3	2
4	4	3	4	4	1	2	3	4	4	4	4	1	4	2	4	4	2	4	3	1	4	5	5	6	6	3
5	2	2	2	3	1	1	2	4	4	2	4	1	4	1	5	4	1	4	1	2	4	5	5	5	6	3
4	4	4	5	1	4	4	3	4	3	5	4	3	2	4	4	3	2	3	5	5	4	5	1	1	5	2
4	2	4	1	5	2	1	3	4	3	4	5	2	4	1	4	4	1	5	2	2	4	4	3	6	7	3
5	3	3	3	2	2	2	2	3	2	2	3	3	4	4	4	4	4	4	3	3	3	2	2	2	2	1
4	1	4	3	4	1	1	1	4	4	1	4	1	4	1	4	4	1	4	1	1	4	6	6	6	6	3
3	3	4	2	3	3	3	2	4	3	4	4	1	4	4	4	4	3	4	3	2	3	5	5	5	4	4
4	2	3	2	3	3	2	2	3	3	3	4	3	3	4	3	4	2	3	2	3	3	3	5	3	1	2
4	4	4	3	4	2	1	1	4	4	3	5	2	4	3	4	4	3	3	1	3	2	6	5	5	6	3
4	3	3	3	3	2	3	3	4	3	3	4	4	4	4	3	3	3	4	3	2	4	2	5	6	3	2
3	2	1	1	1	1	1	1	1	1	3	2	2	1	1	2	2	2	1	1	2	2	2	2	2	5	4
3	2	3	2	2	2	2	2	3	2	2	3	2	3	3	3	3	2	2	3	2	3	5	5	6	6	5
4	1	3	1	3	1	1	1	3	1	1	3	2	4	1	3	3	1	3	1	1	4	5	5	5	6	6
4	2	4	2	3	1	2	1	3	3	2	3	1	5	3	3	3	2	3	2	3	4	2	6	4	4	6
5	1	1	1	3	1	1	1	3	3	1	3	1	3	1	3	3	1	3	1	1	3	1	6	5	3	1
3	1	3	1	3	1	1	1	3	3	3	3	1	3	3	3	3	2	3	1	2	3	5	5	5	5	5
4	1	4	2	4	2	1	1	5	4	1	5	1	4	2	4	5	1	5	1	2	5	6	7	6	6	6
4	1	3	2	4	1	1	1	4	3	2	4	1	3	1	5	3	1	4	1	1	5	6	6	6	6	4
5	2	4	2	3	2	4	1	3	4	1	2	1	4	4	4	4	1	4	4	2	3	5	5	3	3	3
4	5	4	2	4	1	1	1	4	5	4	2	1	5	4	5	3	2	5	1	4	4	5	5	5	1	2
4	5	4	2	4	1	1	1	4	5	4	2	1	5	4	5	3	2	5	1	4	4	5	5	5	1	2
4	1	3	1	3	1	2	2	3	4	4		1	3	1	4	4	1	5	1	2	4	3	2	3	2	2
3	2	2	1	2	1	1	1	2	2	1	3	1	2	2	3	4	1	3	2	1	4	5	5	5	5	2
4	1	3	2	3	1	2	1	4	3	2	3	1	3	2	3	3	1	4	2	2	4	6	7	7	7	6
5	2	3	2	4	2	1	1	4	5	3	3	1	5	1	5	4	2	2	1	1	4	6	6	7	3	2
4	1	2	1	5	1	1	1	3	3	3	3	1	2	1	3	3	1	4	1	1	4	6	6	7	7	7
4	2	4	1	5	2	1	3	4	3	4	5	2	4	1	4	4	1	5	2	2	4	4	3	6	7	3
4	1	3	2	3	2	2	1	3	1	2	3	2	3	2	4	4	2	4	2	2	4	4	6	6	6	5
4	1	3	1	5	1	1	1	4	4	1	3	1	5	2	5	4	1	5	1	2	4	5	5	6	5	1
4	1	3	1	5	1	1	1	4	4	1	3	1	5	2	5	4	1	5	1	2	4	5	5	6	5	1
4	1	3	1	3	1	1	1	4	3	1	5	1	4	1	4	4	1	4	1	1	4	4	5	5	5	1
4	3	5	3	4	4	4	3	3	4	4	3	1	2	2	3	5	2	2	2	3	5	6	4	6	7	4
4	4	3	4	4	1	2	3	4	4	4	4	1	4	2	4	4	2	4	3	1	4	5	5	6	6	3
4	1	4	1	4	1	1	1	5	3	1	4	1	3	1	4	5	1	5	1	1	4	6	6	6	6	5
4	1	2	1	5	1	1	1	3	4	3	5	1	3	1	5	5	1	4	1	1	4	7	7	7	7	7
4	1	2	1	5	1	1	1	3	4	3	5	1	3	1	5	5	1	4	1	1	4	7	7	7	7	7
4	2	4	2	5	2	1	1	4	4	3	5	1	3	2	3	4	1	3	1	1	4	6	6	6	6	6
3	2	2	2	4	3	2	1	3	3	4	3	2	2	3	3	3	4	2	2	3	3	5	7	5	6	6
4	4	3	4	1	3	4	2	4	2	3	3	3	2	5	2	3	5	2	4	3	3	4	7	3	7	5
4	2	3	2	4	2	2	1	4	4	2	4	1	4	2	4	4	2	4	1	2	4	4	3	5	6	6
4	1	3	1	2	1	1	1	3	2	2	4	1	5	1	3	4	1	3	1	2	5	7	7	7	7	7
4	1	3	1	2	1	1	1	3	2	2	4	1	5	1	3	4	1	3	1	2	5	7	7	7	7	7
4	1	4	2	3	2	2	1	4	4	2	4	1	4	1	4	5	1	3	1	2	4		6	6	7	6
4	1	4	3	4	1	2	1	4	4	1	4	1	4	1	5	5	1	4	1	1	5	7	7	6	6	6
4	1	3	2	3	1	1	1	3	4	2	4	1	3	2	4	4	1	3	1	1	4	5	7	7	6	6
4	1	3	1	3	1	1	1	3	4	2	3	1	3	2	3	3	1	3	1	2	5	7	7	7	6	5
5	5	3	5	3	3	3	3	3	3	4	3	3	3	3	3	3	3	3	3	4	4	5	5	5	5	5
4	2	1	1	2	1	1	1	2	4	1	5	1	3	3	4	3	1	2	1	1	4	4	6	6	5	7
4	2	2	1	5	1	1	1	2	3	2	4	1	4	2	5	3	1	3	1	1	4	7	7		7	7
4	2	3	2	4	5	2	1	4	2	4	3	4	2	2	4	5	4	4	2	1	5	6	6	6	6	7
4	4	2	2	1	2	1	1	2	2	3	2	1	3	2	2	2	1	1	2	3	3	2	6	2	2	1
3	4	3	3	3	2	1	2	3	3	4	4	3	2	4	3	4	3	3	2	2	3	6	6	6	6	6
4	1	3	2	5	1	1	2	3	4	3	5	1	3	2	5	4	1	4	1	2	3	6	5	4	5	7
4	4	3	4	3	1	2	1	1	2	2	4	2	2	2	3	3	2	3	2	3	3	3	6	2	4	1
3	2	3	3	3	2	2	3	2	3	3	2	2	2	3	2	2	2	2	2	2	3	4	5	5	4	3
3	1	3	2	3	2	1	1	3	2	2	2	2	1	1	3	2	1	1	1	2	3	1	2	2	2	1
4	2	1	5	2	1	1	1	3	3	2	3	1	2	3	3	5	1	3	3	2	2	5	6	6	6	3
4	2	4	2	3	1	2	1	4	4	1	4	1	3	1	4	4	1	2	1	3	3	5	5	5	5	3
4	3	2	2	2	3	3	2	3	2	2	2	2	2	4	2	4	3	2	3	3	3			5	5	2
4	2	3	2	3	1	2	2	4	4	4	5	1	4	2	4	2	1	4	2	2	4		6	4	5	5
3	2	2	3	4	2	2	3	4	4	2	3	1	4	2	4	3	1	4	1	2	4	7	5	6	6	5
4	1	3	1	3	1	1	1	4	3	2	4	1	2	2	3	4	1	4	1	1	4	4	5	6	4	1
1	4	1	3	1	1	1	1	1	1	3	1	1	1	1	3	2	1	1	1	3	1	2	2	2	2	1
4	1	3	1	4	1	1	1	3	4	1	4	1	3	1	4	4	1	3	1	1	5	6	6	6	6	5
3	5	2	4	2	4	4	2	2	4	4	1	2	4	5	3	2	3	1	4	4	3	2	5	4	3	2
3	5	2	4	2	4	4	2	2	4	4	1	2	4	5	3	2	3	1	4	4	3	2	5	4	3	2
3	4	2	4	3	2	4	1	1	2	3	2	2	2	4	2	2	2	2	3	3	3	5	6	6	6	3
3	4	2	4	3	2	4	1	1	2	3	2	2	2	4	2	2	2	2	3	3	3	5	6	6	6	3
4	2	3	2	4	1	1	1	4	4	2	5	1	4	1	5	5	1	4	1	2	4	5	5	5	5	3
5	2	4	3	5	2	2	1	5	5	4	4	1	3	3	5	4	1	5	2	2	4	5	6	5	3	2
4	2	2	2	3	1	1	4	5	5	4	4	1	5	3	5	5	4	2	3	3	2	5	6	4	5	3
4	1	3	3	4	3	1	1	4	3	2	3	1	2	1	5	5	1	5	1	3	4	1	3	3	2	5
3	2	3	2	3	3	2	1	3	3	2	3	2	3	2	3	3	1	4	2	2	3	3	3	3	3	2
5	1	4	1	4	1	1	1	4	4	1	4	1	3	1	3	4	1	4	1	2	5	7	7	7	7	6
3	4	2	3	1	1	5	1	2	2	4	1	2	3	5	1	1	3	2	5	3	3	2	4	3	2	6
4	2	2	1	3	1	1	1	4	4	3	1	1	3	3	4	3	1	2	2	3	3	6	6	6	5	2
5	1	4	3	4	1	4	1	5	5	3	5	1	5	4	5	5	2	4	3	3	5	6	5	6	6	1
4	2	3	2	4	2	2	2	3	3	2	4	2	4	2	4	4	2	3	2	2	3	5	6	6	6	6
4	2	3	2	4	2	2	2	3	3	2	4	2	4	2	4	4	2	3	2	2	3	5	6	6	6	6
4	1	3	1	3	1	1	1	3	2	1	1	1	3	1	4	4	1	3	1	1	3	4	6	5	6	4
3	3	2	3	2	4	2	2	2	1	3	4	3	4	2	5	4	2	2	2	3	3	2	6	2	2	3
4	4	3	4	4	5	2	2	3	2	2	3	2	3	2	4	3	2	4	2	4	4	1	6	1	1	1
4	3	4	3	4	2	2	2	4	4	2	4	2	4	2	4	4	2	4	2	3	4	5	4	4	3	3
5	1	4	1	4	2	1	1	4	4	2	4	2	4	1	4	4	1	5	1	1	4	6	7	7	7	6
4	1	2	2	3	1	1	1	3	1	2	4	1	2	2	2	4	1	3	1	2	4	5	6	6	6	3
4	2	4	3	3	2	2	1	4	3	2	4	1	4	3	3	4	2	4	2	2	4		5	6	6	5
4	2	3	2	3	1	1	1	4	2	2	3	1	4	2	3	4	1	4	2	2	3	6	6	6	6	4
4	2	4	2	3	1	1	1	4	3	3	4	1	4	2	4	4	1	4	1	2	4	5	5	5	5	3
3	4	3	3	2	5	3	1	2	2	1	2	2	3	5	3	4	4	2	3	3	4	5	6	6	5	3
4	2	4	2	5	1	1	1	5	5	1	5	1	4	2	5	5	1	4	1	1	5	6	6	7	6	6
4	2	3	2	3	4	2	1	3	3	3	4	1	4	2	5	4	2	3	2	2	4	3	5	5	2	6
4	1	3	1	4	1	1	1	4	5	2	4	1	4	1	4	4	1	5	1	1	5		6	6	6	5
5	2	3	2	4	1	1	1	5	4	2	5	1	5	1	5	5	2	4	2	1	4	7	7	6	7	3
4	1	3	1	4	1	2	2	4	4	2	4	2	4	2	4	4	2	4	2	2	4	6	6	6	6	6
4	3	3	2	2	5	1	2	3	1	2	4	4	2	3	3	4		4	1	2	3	2	5	3	3	1
4	2	3	1	3	1	2	1	4	3	2	4	1	3	2	5	4	2	3	1	2	4	6	6	6	6	5
4	3	4	2	5	1	2	1	4	4	3	3	1	4	3	4	4	3	3	2	3	4	5	7	5	5	7
4	3	4	2	5	1	2	1	4	4	3	3	1	4	3	4	4	3	3	2	3	4	5	7	5	5	7
4	2	4	2	4	1	1	1	4	4	2	4	2	4	2	5	4	2	5	2	3	4	6	6	6	6	7
4	1	4	1	3	2	2	1	4	4	2	4	2	5	2	4	4	1	5	2	2	4	7	6	7	7	6
4	1	4	1	4	1	1	1	4	4	1	4	1	4	1	4	4	1	4	1	1	4	6	7	7	7	3
3	4	2	4	5	3	5	3		4	3	2	4	4	4	5		4	1	1	2		4	5	4	5	1
5	2	3	1	4	1	2	1	4	3	1	4	1	4	1	5	5	1	5	1	1	4	5	5	6	7	6
5	2	3	1	4	1	2	1	4	3	1	4	1	4	1	5	5	1	5	1	1	4	5	5	6	7	6
5	1	3	3	4	1	1	1	4	1	2	5	1	4	3	4	5	2	5	1	2	4	6	6	6	6	3
5	1	4	1	4	1	1	1	4	4	1	4	1	3	1	3	4	1	4	1	2	5	7	7	7	7	6
4	4	5	3	3	3	4	3	4	3	4	4	2	5	4	4	3	2	3	4	3		3	5	5	5	3
4	3	4	2	2	2	2	1	4	2	2	4	2	4	2	5	5	1	2	1	1	4	4	5		4	2
4	2	3	2	3	1	2	1	4	4	2	3	1	3	2	5	4	2	3	1	1	4	5	6	6	5	5
4	1	3	2	4	2	1	2	4	4	2	4	2	4	2	4	4	1	4	1	2	4	5	6	6	6	7
4	1	4	1	4	1	1	1	4	4	1	4	1	4	1	5	5	1	4	1	1	5	7	7	6	7	7
3	4	3	3	2	2	2	1	2	2	4	3	1	2	4	3	3	3	2	2	2	3	5	6	6	6	6
4	1	4	1	4	2	1	1	4	4	1	4	1	4	1	4	4	1	4	1	1	4	2	2	2	2	2
4	2	2	4	3	2	2	2	3	3	3	3	1	2	3	3	3	1	2	2	3	2	3	3	2	5	5
4	1	3	1	3	2	1	1	4	2	1	4	1	3	1	5	4	1	4	1	1	4	2	2	3	5	2
3	2	3	2	3	2	2	2	4	3	2	4	1	4	2	4	4	2	4	2	2	4	5	5	6	6	3
4	1	3	2	4	1	1	1	5	3	2	4	1	3	2	4	4	1	4	1	2	4	6	7	7	7	6
4	1	4	2	4	1	2	2	4	4	2	5	1	3	2	4	4	2	4	2	1	4	3	5	5	5	3
4	1	4	2	4	1	1	1	4	2	1	4	1	2	1	4	4	1	4	1	1	4	6	6	6	5	3
4	2	3	2	4	2	2	3	4	5	4	3	2	4	3	4	4	2	3	2	2	3	6	6	5	6	5
4	2	4	3	4	2	2	2	4	4	3	3	3	3	2	5	4	2	5	3	2	3		5	5	4	3
4	1	3	1	4	1	1	1	3	2	2	3	1	3	2	3	3	1	4	1	2	3		3	5	5	3
4	2	3	2	3	3	2	2	3	2	2	3	4	3	4	5	4	2	4	3	2	2	2	2	2	2	2
4	2	2	2	3	2	2	2	3	3	3	2	1	2	3	4	2	2	3	3	2	3	2	6	3	5	6
3	2	2	1	2	3	2	1	2	1	3	2	1	2	3	2	2	2	1	2	2	2	2	3	5	4	4
5	4	3	3	3	2	3	2	5	2	3	5	1	3	5	5	5	4	4	4	3	3	6	6	5	6	2
4	3	3	4	2	2	2	2	3	2	2	2	1	3	4	4	3	2	2	2	2	3	2	5	5	5	2
5	3	3	3	4	2	2	1	3	5	2	4	2	3	3	4	4	3	3	2	2	4	5	3	3	5	6
4	1	3	2	4	1	1	2	4	5	2	4	1	3	2	4	4	1	5	1	2	4	6	6	6	6	3
4	1	3	1	4	1	1	1	4	4	1	4	1	4	1	4	4	1	4	1	1	4	6	6	6	6	6
3	2	2	2	2	2	2	1	3	2	2	2	1	2	2	2	2	2	2	2	2	2	2	3	2	2	1
4	2	3	2	3	1	1	1	3	3	2	4	1	4	2	4	4	1	4	1	1	4		6	5	6	2
4	2	3	2	4	1	1	1	3	4	2	3	1	3	2	4	4	1	5	1	2	4	6	7	5	6	4
4	1	3	2	4	1	1	1	5	3	2	5	1	3	1	4	4	1	4	1	1	5	6	7	7	7	6
4	1	3	1	4	1	1	1	4	4	1	4	1	3	1	3	3	1	4	1	1	4	5	5	5	5	4
4	1	3	1	4	1	1	1	4	4	1	4	1	3	1	3	3	1	4	1	1	4	5	5	5	5	4
4	1	3	3	2	1	1	1	4	4	1	4	1	5	1	5	4	1	4	1	2	5	4	6	6	7	6
4	1	5	2	4	1	1	1	4	4	1	1	1	3	2	4	3	1	4	1	1	5	6	6	6	6	6
3	4	3	3	2	2	2	1	2	2	4	3	1	2	4	3	3	3	2	2	2	3	5	6	6	6	6
4	2	2	2	3	1	1	1	3	2	2	3	1	3	3	4	4	3	3	2	2	3	4	4	5	5	4
4	3	3	3	4	2	1	3	3	3	3	3	1	4	2	5	4	2	4	1	2	3	5	6	5	5	2
4	1	3	1	2	1	1	1	4	4	2	3	1	4	2	5	3	2	3	2	2	4	6	7	7	6	3
4	2	2	2	1	1	1	1	2	2	3	3	1	1	2	3	3	1	2	1	3	3	5	5	5	6	6
3	1	3	1	3	1	2	1	3	3	2	5	1	3	4	4	3	2	3	2	1	4	6	6	6	7	5
4	2	3	2	1	3	1	1	3	2	2	4	1	1	2	3	5	1	3	1	2	3	3	5	5	5	5
4	1	4	3	4	1	1	1	4	4	1	4	1	4	2	4	4	1	4	2	2	4	6	5	7	6	4
4	1	3	1	2	1	1	1	4	3	1	5	1	3	2	3	4	1	2	2	1	4	6	6	7	6	5
4	2	3	2	3	2	1	1	3	4	2	4	1	4	1	5	5	1	3	1	1	4		6	5	5	4
4	3	3	2	3	2	2	1	4	3	2	4	2	4	3	4	4	2	3	2	2	4	6	6	6	6	6
4	2	4	3	4	2	2	1	4	3	2	5	1	4	2	4	5	1	4	1	1	4	5	5	6	6	3
5	2	3	1	3	2	2	2	4	5	2	5	1	4	2	4	4	2	3	2	2	5	6	6	7	7	7
3	1	2	4	2	2	3	1	2	3	3	4	2	3	5	3	3	4	3	3	4	3	6	5	6	6	5
4	1	3	1	2	2	2	1	4	4	2	4	2	4	1	4	4	1	4	1	2	4	6	6	7	6	5
3	1	1	1	5	2	1	2	4	4	2	4	2	4	2	4	1	4	4	1	2	4	6	6	6	6	3
4	2	3	1	4	1	1	1	3	3	1	3	1	4	2	3	4	2	3	1	2	4	5	6	6	6	4
4	4	2	3	1	3	3	2	2	2	2	2	2	3	5	2	3	4	1	4	4	3	5	5	5	6	5
5	1	3	2	4	1	2	1	5	5	1	4	2	4	2	5	4	2	4	1	1	4	6	6	6	6	6
4	2	4	2	4	1	2	1	5	5	4	4	1	3	3	5	4	1	4	2	2	3	7	7	7	6	7
5	1	4	1	4	1	1	3	4	4	2	5	1	3	1	5	5	1	4	1	1	4	6	6	7	7	6
5	2	5	2	5	1	2	1	5	5	2	5	1	5	5	5		2	3	2	2	5	6	7	7	7	6
4	1	3	1	4	1	2	1	5	5	2	4	1	4	2	4	4	1	5	1	1	5	6	6	6	6	7
3	1	2	1	3	2	2	1	3	2	2	4	1	2	3	4	4	3	3	2	1	3	3	5	5	5	3
4	1	3	2	4	1	1	1	5	3	2	4	1	3	2	4	4	1	4	1	2	4	6	7	7	7	6
4	1	4	1	4	1	1	1	4	4	1	4	1	4	1	5	5	1	4	1	1	5	7	7	6	7	7
4	1	3	1	3	1	1	1	4	4	2	4	1	4	3	4	4	2	4	1	1	4	6	6	6	7	5
5	2	4	1	4	1	2	1	5	4	2	5	1	5	2	5	4	2	5	2	1	5	6	7	7	6	2
5	3	2	2	4	4	1	1	3	2	2	3	2	2	3	4	4	3	2	1	2	4	4	5	5	3	2
5	3	2	2	4	4	1	1	3	2	2	3	2	2	3	4	4	3	2	1	2	4	4	5	5	3	2
5	2	3	2	5	1	1	1	4	3	2	5	1	5	2	5	5	1	4	1	2	4	6	6	6	7	6
5	1	3	2	4	2	1	1	5	3	2	5	1	3	2	5	5	2	4	1	2	4	5	5	7	6	6
4	1	3	1	3	1	1	1	4	3	1	4	1	4	1	3	3	3	4	1	1	4	4	3	4	6	1
2	1	2	2	3	3	2	2	2	3	2	3	2	2	2	2	3	2	2	2	2	4	6	7	7	5	4
3	1	3	3	3	1	1	3	3	3	3	3	1	3	1	3	3	1	3	1	1	3	5	3	5	3	3
4	2	3	2	3	2	1	1	3	2	3	3	2	4	1	2	5	1	3	1	1	3	4	6	6	6	3
4	2	3	2	3	2	1	1	3	2	3	3	2	4	1	2	5	1	3	1	1	3	4	6	6	6	3
4	1	3	2	4	2	1	1	3	3	3	3	2	2	1	3	3	1	2	1	2	4	5	6	6	6	5
4	1	3	2	4	2	1	1	3	3	3	3	2	2	1	3	3	1	2	1	2	4	5	6	6	6	5
2	4	2	3	2	4	3	2	2	3	4	2	4	2	4	3	3	4	2	3	3	2	2	5	2	4	1
2	1	2	2	3	1	1	1	2	3	2	2	1	2	1	2	2	1	3	1	2	2	3	5	5	5	2
4	1	2	1	5	1	1	2	3	4	1	4	1	2	1	4	4	1	5	1	1	4	6	5	6	6	6
4	2	3	2	4	3	2	3	4	3	4	4	2	4	2	3	3	1	4	2	2	3	5	5	5	6	2
4	3	3	3	4	2	2	2	3	4	4	2	2	5	3	2	3	2	3	2	2	4	6	5	5	6	5
3	1	3	1	3	2	2	1	3	3	2	3	1	2	2	3	3	2	3	2	2	3	5	5	6	6	4
4	3	3	1	3	1	2	3	4	5	3	3	2	2	4	4	3	2	3	2	3	4	5	6	6	5	5
4	3	3	1	3	1	2	3	4	5	3	3	2	2	4	4	3	2	3	2	3	4	5	6	6	5	5
3	2	1	2	1	1	2	3	2	1	3	2	1	2	5	5	3	3	1	2	2	1	2	1	2	1	2
4	4	2	3	5	1	2	3	3	5	4	4	1	1	2	4	4	1	4	2	3	3	3	3	3	3	3
4	2	4	1	4	1	1	1	4	4	3	4	2	4	2	4	4	1	4	1	1	4	6	6	5	5	5
4	1	2	1	4	1	1	2	2	3	1	4	1	1	2	4	5	3	3	1	3	3	5	7	7	5	6
4	1	2	1	4	1	1	2	2	3	1	4	1	1	2	4	5	3	3	1	3	3	5	7	7	5	6
4	1	3	2	3	2	1	1	3	3	2	3	3	3	2	4	4	2	3	2	2	3		6	6	6	4
4	3	3	1	4	1	1	1	4	3	2	3	1	3	3	3	3	2	2	1	1	3	6	4	5	5	4
4	3	3	1	4	1	1	1	4	3	2	3	1	3	3	3	3	2	2	1	1	3	6	4	5	5	4
4	1	3	2	3	1	1	1	4	4	2	3	1	2	2	5	4	1	3	1	2	4	6	6	6	5	3
4	1	4	2	3	1	2	1	5	5	2	4	2	4	3	4	5	2	4		3	3	6	4	6	6	4
4	1	2	1	4	1	1	1	3	2	1	4	1	3	1	3	5	1	3	1	2	2	5	6	5	5	3
4	1	3	2	4	1	1	1	5	3	2	4	1	4	2	4	3	1	5	1	2	4	6	2	6	6	2
4	1	3	1	4	1	1	1	4	3	2	4	1	3	1	4	4	1	5	1	1	3	6	7	6	7	4
2	1	3	3	2	3	3	2	4	3	4	3	2	3	4	3	3	4	3	4	2	4	4	4	4	5	3
4	2	2	1	3	1	1	4	3	3	3	3	1	4	2	4	4	1	2	1	2	4	6	6	6	6	5
4	1	2	1	3	1	1	1	3	2	1	4	1	2	2	4	4	1	4	1	2	4	6	6	6	6	6
4	1	3	2	3	1	1	1	3	2	2	3	1	3	1	3	4	1	3	1	2	4	6	6	6	6	6
3	2	3	1	4	2	2	1	4	2	2	4	2	3	3	4	4	2	4	2	2	4	5	5	5	5	3
4	1	4	2	5	3	1	1	4	4	1	4	2	3	2	5	4	1	4	1	1	5	6	6	7	6	6
3	2	3	3	4	4	3	4	3	4	4	3	4	3	3	3	3	3	2	3	4	2	3	3	4	4	3
4	3	4	3	4	2	2	3	4	4	3	4	2	4	3	4	4	1	4	1	2	4	5	6	6	6	2
4	5	4	3	2	2	4	1	4	3	3	2	1	2	4	3	3	1	4	4	4	4	2	3	4	3	3
4	2	3	2	4	2	2	2	4	4	2	5	1	3	3	5	5	2	4	2	2	3	3	3	3	2	5
4	1	4	2	4	1	1	1	4	4	2	5	1	4	1	4	5	1	5	1	3	5	6	6	6	6	6
4	1	4	2	4	1	1	1	4	4	2	5	1	4	1	4	5	1	5	1	3	5	6	6	6	6	6
4	3	3	2	5	1	1	1	3	3	3	5	1	3	2	5	4	1		5	2	3		2	4	5	4
5	1	5	1	5	1	1	1	5	5	1	5	1	5	1	5	5	1	5	1	3	5	7	7	7	7	6
4	3	3	3	2	1	3	1	4	3	3	2	1	4	4	3	2	1	3	2	3	5	3	5	6	5	2
4	2	3	2	3	2	2	2	3	3	2	4	2	4	3	4	4	3	4	2	2	4	5	5	5	5	3
5	1	3	2	4	1	2	1	4	3	2	5	1	3	3	4	5	1	5	1	2	4	6	7	6	6	6
4	1	3	1	4	2	1	1	4	3	1	4	1	4	2	5	5	1	4	2	2	5	7	7	7	7	6
4	3	3	3	3	3	2	2	3	4	4	4	3	4	4	5	3	1	3	2	3	3	4	4	3	3	2
4	4	3	2	3	4	3	2	4	4	3	4	1	2	3	5	4	3	3	2	2	3	6	6	6	7	6
4	4	3	2	3	4	3	2	4	4	3	4	1	2	3	5	4	3	3	2	2	3	6	6	6	7	6
3	1	3	2	3	1	2	1	4	3	2	3	1	5	2	4	3	2	3	1	3	5	6	6	6	6	6
3	2	2	4	2	1	1	2	4	4	4	3	1	4	3	4	4	1	2	1	2	4	6	6	7	7	1
4	2	3	3	3	3	3	2	3	4	3	4	3	3	3	4	4	3	4	3	3	3	6	6	6	7	6
3	2	3	2	3	1	1	1	3	3	2	3	1	3	2	3	3	1	3	1	1	4	6	6	6	6	3
4	1	3	1	3	2	4	1	3	3	3	3	1	3	4	3	4	1	3	4	1	3	3	3	3	4	3
4	4	3	2	1	4	4	3	4	4	2	2	4	4	5	3	3	3	2	4	2	3	2	7	4	2	1
4	1	3	2	3	2	2	1	3	4	1	3	2	2	2	4	3	1	3	1	2	4	5	7		7	3
4	3	4	4	3	3	2	2	4	3	3	4	1	3	2	4	4	1	4	1	3	4	5	6	5	5	4
3	1	1	2	2	2	2	1	3	3	3	2	1	2	3	3	3	2	2	1	2	2	3	3	5	5	2
4	1	1	1	2	1	2	1	2	3	1	4	1	2	2	3	3	2	4	1	1	2	7	6	7	7	6
4	1	3	2	4	1	2	1	4	3	2	3	2	4	3	3	4	3	4	2	3	4	3	5	5	5	3
4	3	4	3	3	2	4	2	4	4	2	4	1	4		3	4	2	3	2	3	4	3	3	3	3	2
4	1	2	1	4	2	1	2	3	4	3	5	2	5	2	4	5	1	4	1	2	3	3	5	3	6
4	1	3	2	4	1	1		3	3	2	4	1	2	1	4	3	1	5	1	2	3	5	6	6	6	3
4	1	3	1	4	1	1	1	4	4	1	4	1	3	1	4	4	1	4	1	1	5	5	5	6	6	5
4	1	3	2	3	1	1	1	3	4	2	3	1	3	1	3	4	1	4	1	1	4	6	6	6	5	5
2	5	2	4	1	3	3	2	1	2	4	2	3	1	5	4	3	4	3	5	5	1	2	2	2	2	2
4	1	3	1	3	1	1	1	3	3	2	4	1	3	2	4	4	2	4	2	1	4	6		7	7	3
2	1	1	1	3	1	1	1	2	3	2	3	1	2	1	3	3	2	2	1	2	3	5	4	6	3	3
4	1	3	1	3	1	1	1	4	4	2	4	1	4	1	3	3	1	5	1	1	5	6	7	7	7	3
4	1	2		3	1	1	1	3	2	2	3	1	4	1	3	3	1	3	1	2		5	4	5	5	4
3	2	1	2	3	3	1	1	2	2	3	3	1	1	1	3	4	1	2	1	3	2	2	5	1	5	1
3	2	3	1	3	2	2	1	3	4	2	2	1	2	2	4	2	3	3	1	1	4	6	6	7	6	5
3	2	3	1	3	2	2	1	3	4	2	2	1	2	2	4	2	3	3	1	1	4	6	6	7	6	5
5	2	3	2	4	1	1	1	3	4	2	4	1	4	1	4	5	1	4	1	2	4	5	3	3	5	5
4	2	2	1	3	1	1	1	3	3	2	5	1	3	2	4	5	1	3	1	2	3	5	6	6	3	3
4	2	2	1	3	1	1	1	3	3	2	5	1	3	2	4	5	1	3	1	2	3	5	6	6	3	3
4	1	4	1	5	1	1	1	4	5	2	5	1	5	2	5	5	1	4	1	2	4	6	7	6	4	4
4	2	3	1	3	1	2	1	3	3	2	3	1	3	2	4	3	2	1	2	2	3	5	5	6	6	4
3	3	3	3	3	2	2	1	4	3	3	4	1	3	2	4	4	1	4	1	2	3	3	4	6	3	2
4	2	3	1	5	1	2	2	5	4	2	4	1	5	1	5	4	1	5	1	1	5	7	7	6	6	6
5	2	3	2	3	1	2	1	5	3	5	5	1	3	2	4	4	1	4	1	1	3	1	2	2	2	1
4	1	3	2	4	2	1	1	4	2	1	4	1	3	1	3	3	1	3	1	2	3	4	6	6	4	5
5	2	4	2	4	1	2	2	4	4	2	4	2	4	2	4	4	2	4	1	2	4	5	6	6	5	4
4	2	4	2	4	2	2	2	4	4	2	5	1	4	2	5	5	1	4	2	2	4	5	5	6	6	3
5	1	4	3	4	1	1	1	5	5	1	5	1	5	1	5	5	1	5	1	1	5	6	6	6	6	3
4	3	3	2	5	1	2	1	4	3	1	5	1	2	3	4	5	1	3	3	4	4	5	5	3	6	3
4	1	3	1	4	1	2	1	4	4	2	4	1	4	2	4	4	1	4	1	1	4	6	6	6	6	3
3	1	3	1	4	1		1	3	4	1	3	1	4	2	4	4	1	3	1	1	4	3	6	6	6	6
4	3	3	2	4	1	2	1	4	5	1	5	1	4	3	4	5	1	4	2	2	4	2	3	3	6	2
4	3	2	3	1	4	3	1	1	1	1	2	3	2	3	3	2	2	2	3	4	2	1	1	2	2	1
4	2	4	2	3	2	2	1	4	4	1	5	1	5	2	5	5	2	4	1	1	5	6	7	6	7	6
3	1	2	2	4	2	2	2	4	4	3	5	1	3	2	4	5	2	4	1	2	4	5	6	6	6	2
4	2	3	3	3	3	2	2	3	3	2	3	2	4	3	3	4	3	4	3	3	3	5	6	5	5	2
3	2	3	4	4	2	2	3	4	5	3	4	2	3	4	5	3	2	3	2	3	2	1	1	2	2	2
3	2	1	2	4	1	2	1	3	1	3	3	1	2	3	3	4	2	3	2	2	2	2	2	2	3	3
5	3	3	3	4	4	2	2	3	3	4	3	3	2	4	4	2	3	5	3	2	3	3	4	5	5	1
3	1	2	2	4	2	2	2	4	4	3	5	1	3	2	4	5	2	4	1	2	4	5	6	6	6	2
4	2	3	3	4	3	2	2	3	4	4	4	2	3	3	3	2	2	4	2	2	5	6	6	7	7	6
4	2	3	3	3	3	2	2	3	3	2	3	2	4	3	3	4	3	4	3	3	3	5	6	5	5	2
5	1	3	2	4	3	2	2	3	5	4	4	1	2	4	5	5	2	4	2	2	4	7	7	6	7	6
4	1	3	1	3	1	1	1	4	4	4	4	1	3	4	4	4	1	4	1	1	4		6	6	6	3
3	1	3	1	3	1	1	1	3		1	3	1	3	1	4	3	1	3	1	2	3	5	5	6	5	6
5	3	5	2	4	4	2	1	4	4	2	5	1	4	2	3	5	2	4	1	2	4	1	5	3	3	1
4	2	3	2	3	2	2	1	3	4	2	3	1	1	2	4	4	2	3	2	2	4	1	4	3	3	5
4	3	4	3	4	2	2	2	4	4	3	4	3	4	2	4	4	4	3	2	2	4	5	6	6	6	4
4	2	3	2	4	1	1	1	3	4	2	5	1	4	2	5	5	3	3	1	1	4	6	6	7	7	4
3	1	3	1	1	1	1	1	2	3	2	2	1	4	2	4	3	3	2	1	1	4	5	6	6	6	2
4	1	3	1	2	1	1	1	3	2	2	4	1	4	2	4	4	3	3	2	1	3	6	6	6	7	7
4	1	3	1	3	2	1	1	3	4	2	3	1	4	1	4	3	1	3	1	1	4	6	6	6	6	6
4	1	3	1	3	2	1	1	3	4	2	3	1	4	1	4	3	1	3	1	1	4	6	6	6	6	6
4	2	1	1	3	1	1	1	3	4	2	3	1	4	1	3	3	1	3	1	2	4	2	2	2	6	3
4	2	3	2	4	2	2	2	4	4	3	5	2	4	2	4	5	2	4	2	2	3	4	3	6	4	2
3	2	2	3	3	4	4	2	2	2	4	3	3	1	4	4	3	3	3	4	4	2	2	5	4	3	1
5	2	3	2	3	2	2	1	4	4	4	4	1	3	2	4	4	1	3	2	2	4	6	6	6	7	3
5	2	4	2	4	1	2	1	5	5	2	4	2	5	2	4	4	2	4	2	2	4	6	6	6	6	6
4	4	2	3	3	4	4	3	2	3	3	4	2	4	4	4	4	3	4	3	4	3	4	4	3	4	5
4	4	4	4	4	4	4	4	4	4	4	4	4	3	4	4	4	3	4	4	4	4	3	5	6	6	2
4	4	4	2	3	2	2	1	4	3	2	4	1	4	2	5	4	1	4	2	2	4	6	6	6	6	4
5	1	3	1	4	1	1	1	4	1	1	4	1	5	1	5	5	1	3	1	1	5	4	4	4	4	1
5	1	3	1	3	1	1	1	5	3	1	3	1	5	2	3	4	1	5	1	1	5	6	6	6	6	7
5	1	3	1	3	1	1	1	5	3	1	3	1	5	2	3	4	1	5	1	1	5	6	6	6	6	7
4	2	3	1	4	2	1	1	3	2	2	4	1	2	1	4	5	2	4	1	1	4	5	5	6	7	6
4	2	3	2	2	2	3	1	4	3	3	3	1	3	3	3	4	1	3	3	2	4	6	7	6	6	6
4	2	3	2	2	2	3	1	4	3	3	3	1	3	3	3	4	1	3	3	2	4	6	7	6	6	6
4	2	2	2	2	2	2	2	3	3	3	3	2	3	2	3	3	2	2	2	2	3	6	6	6	6	5
4	2	4	1	3	1	1	1	4	3	1	3	1	5	2	4	5	1	2	1	1	5	7	7	7	7	5
4	2	4	1	3	1	1	1	4	3	1	3	1	5	2	4	5	1	2	1	1	5	7	7	7	7	5
4	2	4	2	3	1	2	1	3	3	3	4	2	4	2	4	4	2	5	3	2	4	6	7	6	6	7
3	2	3	3	1	1	1	1	4	4	2	4	1	4	2	4	4	1	4	1	2	4	6	6	6	6	6
4	3	3	3	2	3	2	1	2	3	2	3	1	3	4	3	4	1	1	3	2	4	6	6	6	5	6
5	1	4	1	4	2	1	1	5	5	1	5	1	5	2	5	5	1	5	1	2	5	6	6	7	7	6
4	2	2	2	3	2	2	1	4	4	2	3	1	4	3	4	4	3	4	2	2	4	6	5	6	5	6
4	1	4	1	3	2	2	1	5	5	3	4	1	4	4	4	3	1	3	2	1	4	6	6	6	6	2
4	3	2	1	2	1	2	1	4	3	2	3	1	3	2	4	4	2	2	2	2	3	5	6	5	5	3
4	3	2	2	3	1	2	1	4	4	3	3	2	4	3	4	4	2	2	2	2	4	5	6	5	5	5
4	3	2	1	2	1	2	1	4	3	2	3	1	3	2	4	4	2	2	2	2	3	5	6	5	5	3
5	2	4	2	5	2	2	3	4	5	3	5	1	4	2	5	5	1	3	1	1	5	6	7	7	7	6
4	4	3	4	2	2	4	3	4	4	4	2	2	4	4	4	4	4	2	3	3	4	3	5	3	3	3
4	1	4	1	4	1	1	1	5	5	2	4	1	4	1	4	5	1	4	1	1	5	7	7	7	7	6
4	2	3	2	4	1	1	1	4	3	2	4	1	4	4	4	4	4	4	1	1	5	7	7	7	6	6
4	2	4	2	4	2	3	1	4	4	2	4	2	4	2	4	4	2	5	2	2	4	6	6	6	7	6
3	1	1	1	3	1	1	1	2	1	1	3	1	2	1	4	4	1	3	1	1	2	4	5	6	5	4
2	4	1	3	2	5	5	1	1	1	4	2	5	2	5	1	3	4	2	4	5	3	1	6	1	2	1
3	2	2	2	2	1	2	2	3	3	2	3	2	3	2	3	3	2	3	2	2	3	2	5	5	5	3
4	3	3	4	4	3	4	3	4	4	4	4	3	3	2	5	4	4	3	4	4	4	5	5	6	6	3
4	1	5	5	5	5	5	5	4	4	4	5	4	4	4	4	4	4	4	3	3	5	6	5	6	5	3
4	1	5	5	5	5	5	5	4	4	4	5	4	4	4	4	4	4	4	3	3	5	6	5	6	5	3
3	1	2	1	1	1	2	1	3	3	2	3	1	3	1	2	3	1	1	1	2	3	2	2	5	5	2
4	1	4	1	3	1	2	1	4	2	2	2	1	2	1	4	3	1	3	1	1	4	6	5	6	6	6
4	1	3	1	4	1	1	2	4	4	2	4	1	4	2	5	4	1	4	1	2	4	6	7	6	6	1
4	1	3	1	3	1	1	1	3	3	2	3	1	3	2	3	3	1	3	1	2	3	7	7	7	7	6
3	2	2	1	4	1	2	4	3	2	2	4	1	4	3	3	3	2	3	2	2	4	6	6	6	6	6
4	1	3	1	3	1	2	1	3	3	2	4	1	3	2	4	4	1	4	1	1	3	5	6	6	6	5
4	1	3	1	4	1	1	1	4	4	2	4	1	4	2	4	5	1	4	1	1	5	6	6	6	6	6
5	2	4	2	4	1	1	1	4	5	2	3	1	3	2	3	4	2	4	1	1	5	6	6	6	6	2
4	4	3	2	1	5	4	2	5	4	4	5	5	3	5	4	5	4	1	3	4	2	2	2	3	2	1
2	1	1	2	5	1	1	1	2	2	3	3	1	2	1	1	3	1	1	1	3	2	4	6	4	4	3
4	2	4	4	3	1	2	2	4	4	2	4	1	4	3	4	4	1	4	1	5	3	3	2	5	5	2
5	1	4	1	4	2	2	1	5	4	2	4	1	4	2	5	4	3	4	1	1	4	6	6	6	6	6
5	1	4	1	4	2	2	1	5	4	2	4	1	4	2	5	4	3	4	1	1	4	6	6	6	6	6
3	1	1	1	3	1	1	1	2	1	1	3	1	2	1	4	4	1	3	1	1	2	4	5	6	5	4
4	1	3	2	4	1	1	1	3	3	1	4	1	3	1	1	4	1	4	1	1	4	5	5	6	4	6
5	2	4	2	4	3	2	2	4	4	1	4	2	5	2	5	5	2	5	2	2	5	5	7	6	5	1
3	3	3	2	2	1	1	1	3	2	2	2	1	2	4	4	3	4	3	2	2	2	5	5	5	5	4
3	1	3	1	3	1	2	1	4	5	2	4	2	4	3	3	3	1	3	2	1	4	4	1	5	6	1
4	2	4	2	4	2	3	1	4	4	2	4	2	4	2	4	4	2	5	2	2	4	6	6	6	7	6
5	1	2	1	4	1	1	1	4	4	2	4	1	5	2	5	5	1	5	1	3	4	7	7	7	7	6
5	1	4	1	4	1	1	1	5	5	1	4	1	4	1	5	5	1	4	1	1	5	7	7	7	7	6
4	4	2	4	2	4	4	1	3	3	1	4	4	3	4	4	4	3	4	2	4	2	2	3	2	3	2
4	2	4	2	4	3	2	2	4	4	2	3	2	4	3	4	4	3	2	2	3	4	5	6	5	6	2
4	1	3	1	3	2	1	1	4	2	2	4	1	3	2	3	4	1	4	1	2	4	6	6	6	6	5
2	4	2	3	2	2	2	1	2	4	3	3	2	2	3	3	3	3	3	3	3	3	2	2	2	2	2
4	1	2	1	3	1	1	1	2	2	1	3	1	2	1	2	3	1	3	1	2	3	5	6	5	3	5
4	2	1	1	1	1	3	1	2	2	2	3	1	3	2	4	3	1	3	1	2	2	4	6	6	5	5
4	2	1	1	1	1	3	1	2	2	2	3	1	3	2	4	3	1	3	1	2	2	4	6	6	5	5
4	1	4	1	4	1	1	1	3	4	2	2	1	3	2	3	2	1	3	1	1	4	6	7	5	7	2
4	1	4	1	4	1	1	1	3	4	2	2	1	3	2	3	2	1	3	1	1	4	6	7	5	7	2
5	3	1	2	1	3	3	1	2	1	1	3	3	1	2	2	4	1	1	3	3	2	1	1	2	1	1
4	2	2	2	3	2	2	1	3	3	2	3	2	3	3	4	4	2	2	3	3	3	5	3	4	5	4
4	2	3	2	4	1	1	2	3	4	1	4	1	3	1	5	4	1	3	1	1	3	5	6	5	4	7
4	2	3	2	3	1	2	1	4	4	1	4	1	4	2	5	5	1	4	1	2	4	5	6	6	6	5
4	1	3	2	4	1	1	1	4	4	2	4	1	5	2	5	4	1	4	1	1	4	6	6	6	6	6
4	1	4	1	3	2	1	1	3	3	2	2	1	2	1	2	3	1	2	1	1	4	5	2	2	2	2
5	1	3	1	3	2	2	1	4	5	2	5	1	4	3	5	5	2	4	1	1	4	6	7	6	6	4
3	2	3	2	2	2	2	1	3	3	2	3	2	3	2	4	4	2		1	2	3	5	5	5	5	2
4	3	4	3	4	2	3	3	4	4	2	4	2	4	3	5	5	1	5	3	3	4	6	6	6	6	6
4	3	4	3	2	1	2	1	3	3	2	1	1	3	2	4	4	1	3	2	2	4	2	2	3	6	2
4	4	2	1	3	3	4	1	4	4	1	4	1	5	4	5	5	3	4	1	1	4	7	6	7	6	6
5	3	4	2	3	1	1	1	5	4	1	3	1	4	3	3	5	2	4	1	1	4	6	6	7	6	4
5	3	4	3	4	1	2	2	5	5	2	3	1	4	2	5	5	1	4	1	1	5	5	5	6	7	5
5	3	2	3	4	1	1	1	5	3	2	3	1	4	1	5	5	1	3	1	3	3	6	6		6
5	1	4	2	4	1	1	1	5	4	1	5	1	4	2	4	4	1	4	1	1	4	6	6	6	6	6
4	2	3	2	4	1	1	2	3	4	1	4	1	3	1	5	4	1	3	1	1	3	5	6	5	4	7
3	1	2	3	4	1	2	1	2	2	4	3	1	3	3	2	3	1	2	1	3	3	2	3	3	1	6
4	1	1	1	2	1	1	1	3	3	2	1	1	1	2	4	3	1	4	1	2	3	5	5	5	5	3
4	4	3	2	3	1	2	1	4	2	2	3	1	2	2	4	4	1	3	1	3	2	2	2	2	2	2
5	1	3	1	5	1	1	1	4	5	2	5	1	5	1	5	5	1	5	1	1	4	7	7	7	6	6
3	1	2	2	4	1	1	1	3	4	2	4	1	3	2	4	3	1	4	1	1	3	6	6	6	6	3
3	1	3	3	2	1	1	1	3	5	3	3	1	3	3	3	2	2	3	2	3	4	5	6	6	7	5
4	1	3	3	3	3	2	1	4	4	2	3	2	4	3	4	4	2	3	2	2	4	5	7	5	6	3
4	4	4	4	4	2	1	1	4	4	3	4	1	3		4	4	1	4	1	2	4	6	6	6	6	5
4	4	4	4	4	2	1	1	4	4	3	4	1	3		4	4	1	4	1	2	4	6	6	6	6	5
4	2	3	2	4	2	2	2	4	4	3	4	2	4	3	4	4	3	4	2	2	4	5	5	6	6	3
4	1	3	1	4	1	1	1	4	4	1	4	1	3	1	3	4	1	3	1		4	6	5	7	7	5
4	3	2	2	4	2	2	1	3	3	1	5	1	1	4	5	4	2	5	2	3	3	3	6	3	3	3
4	2	3	2	4	2	2	2	4	3	2	3	2	3	2	4	3	1	4	2	2	4	6	7	7	7	7
5	2	4	3	5	4	4	2	4	5	4	4	3	4	3	4	4	1	2	3	3	3	2	3	3	2	2
4	1	4	1	5	1	1	3	4	5	1	5	3	4	3	5	4	2	5	2	1	5	7	7	7	7	6
3	2	2	2	2	2	1	1	3	3	1	3	1	3	4	4	4	1	4	1	2	3	5	5	6	6	3
3	3	2	2	5	1	2	4	3	5	5	5	1	4	3	5	5	1	1	2	4	2	5	6	6	3	5
4	1	3	1	4	2	1	1	4	4	1	4	1	4	2	5	4	2	4	1	2	4	5	6	6	6	2
4	1	4	2	3	1		1	4	2	2	4	1	4	2	4	4	1	4	1	2	4	7	7	7	7	5
4	2	4	2	5	2	2	1	5	5	2	4	1	5	4	5	3	1	4	1	2	5	3	6	6	4	5
4	2	4	2	4	1	1	1	4	3	2	4	1	4	1	4	4	1	4	1	2	4	2	4	4	6	2
4	2	2	2	3	2	2	1	3	2	1	3	1	4	2	4	4	1	3	2	2	3	5	7	5	6	6
4	3	3	2	3	2	1	1	3	3	2	4	1	1	2	4	3	1	2	1	2	3	5	6	5	7	3
3	1	2	1	4	2	1	1	3	3	2	3	1	4	2	3	3	2	3	2	1	4	5	6	6	4	2
3	2	2	2	4	1	3	2	2	4	3	5	1	3	2	3	2	2	3	2	2	3	3	5	5	3	3
5	1	2	3	4	2	1	3	4	4	4	4	2	2	1	5	3	1	3	1	2	2	2	2	2	7	2
4	1	3	1	2	2	1	1	3	3	3	3	1	3	2	3	3	1	3	1	1	3	6	6	6	6	6
4	1	3	1	2	2	1	1	3	3	3	3	1	3	2	3	3	1	3	1	1	3	6	6	6	6	6
3	4	2	5	2	1	2	1	3	3	1	3	1	1	3	4	3	1	4	4	5	1	2	2	2	5	2
4	2	3	1	4	1	1	1	3	3	2	4	1	3	3	4	4	1	4	1	2	4	5	6	7	7	5
5	1	4	1	4	3	2	2	4	5	3	2	2	4	3	4	4	1	3	2	1	5	6	6	6	6	6
5	1	4	1	4	3	2	2	4	5	3	2	2	4	3	4	4	1	3	2	1	5	6	6	6	6	6
3	4	4	3	3	1	2	1	3	4	1	3	1	3	2	3	3	1	4	1	2	3	5	5	5	5	1
4	1	3	1	4	1	2	1	4	2	2	4	1	4	2	3	4	1	4	1	2	4	6	7	7	6	6
4	2	3	1	1	1	2	1	5	3	2	4	1	4	3	5	4	4	2	1	1	5	6	6	7	7	7
4	2	3	1	1	1	2	1	5	3	2	4	1	4	3	5	4	4	2	1	1	5	6	6	7	7	7
5	3	4	3	5	2	1	1	5	5	3	5	1	5	3	5	5	3	5	2	1	5	7	6	6	6	3
4	2	4	1	4	2	2	1	3	3	2	4	1	3	4	3	4	2	4	2	1	4	6	6	6	6	6
5	2	5	2	4	1	2	1	5	2	1	5	1	4	2	5	5	1	5	2	2	4	6	5	5	5	3
4	1	3	2	4	2	1	2	4	3	2	4	1	4	2	4	4	1	4	1	3	5	5	7	7	6	5
4	1	3	2	4	1	1	1	4	3	2	2	1	2	1	3	4	1	4	1	1	4	5	4	6	6	3
3	1	4	1	3	1	2	2	3	4	1	2	1	2	2	3	3	3	4	1	1	5	6	5	6	5	6
3	1	4	1	3	1	2	2	3	4	1	2	1	2	2	3	3	3	4	1	1	5	6	5	6	5	6
5	1	5	1	5	1	1	1	5	5	1	5	1	5	1	5	5	1	5	1	1	5		7	7	7	4
3	1	3	2	4	1	2	1	3	3	2	4	1	2	1	4	4	1	3	2	2	4	2	4	5	3	6
5	1	4	1	4	1	1	1	4	5	1	4	1	4	1	4	4	1	4	1	1	4	6	6		6
5	2	4	2	4	1	1	2	4	2	2	4	1	4	2	4	4	1	4	2	2	5	6	7	7	6	5
5	1	5	5	5	1	1	5	5	4	1	5	1	4	1	5	1		4	1	3	4	6	6	6	7	3
5	2	5	2	4	1	2	1	5	2	1	5	1	4	2	5	5	1	5	2	2	4	6	5	5	5	3
4	2	2	1	3	2	1	2	3	3	2	3	1	3	2	4	4	1	3	2	2	4	6	7	6	7	6
3	4	2	3	1	2	4	1	2	3	3	2	1	2	4	2	4	3	2	2	4	3	4	5	5	5	3
5	3	4	1	4	2	4	1	5	4	3	3	1	4	4	4	4	3	4	3	1	5	6	6	7	7	5
5	3	4	1	4	2	4	1	5	4	3	3	1	4	4	4	4	3	4	3	1	5	6	6	7	7	5
4	1	2	2	3	2	1	1	3	4	1	4	1	4	1	4	4	1	4	1	2	4	5	6	6		6
4	1	2	1	3	2	2	1	4	3	1	3	1	3	2	4	4	1	5	1	1	3	3	5	2	4	1
3	4	4	2	2	1	3	1	3	2	4	4	2	2	5	3	3	2	1	3	1	4	2	2	4	2	2
3	1	1	1	3	2	2	1	1	4	2	3	2	3	1	4	3	2	3	1	1	4	5	6	6	6	6
3	1	1	1	3	2	2	1	1	4	2	3	2	3	1	4	3	2	3	1	1	4	5	6	6	6	6
4	2	3	3	4	1	1	1	4	4	2	4	1	4	2	5	5	2	4	1	3	5	6	6	6	6	5
4	1	1	1	4	1	1	1	3	3	1	4	1	3	1	4	4	1	4	1	1	3	6	7	7	6	5
4	2	3	2	3	1	2	2	3	3	2	4	2	3	2	4	4	1	3	2	2	4	4	5	4	3	3
4	2	3	1	3	4	1	1	3	4	2	4	3	3	2	4	4	1	4	2	1	4	5	6	5	6	3
4	3	4	2	3	2	2	1	4	3	3	2	2	3	2	4	5	1	3	2	2	4	2	2	5	3	1
3	3	3	3	1	2	3	2	1	1	1	4	1	3	4	2	4	2	3	3	2	4	5	7	5	6	2
5	3	3	2	3	3	2	1	3	4	4	3	2	5	4	4	3	3	4	2	3	3	4	6	5	6	2
5	1	4	1	4	2	1	1	5	5	2	4	1	5	1	5	4	1	3	1	2	5	7	7	6	7	7
4	1	4	1	5	1	1	1	5	4	1	4	1	4	1	4	4	1	5	1	1	5	6	7	7	7	7
4	2	4	2	4	1	1	1	4	5	2	4	1	5	2	5	4	1	4	2	1	4	7	6	7	7	7
4	1	3	2	4	2	1	1	5	5	2	5	2	3	4	5	5	2	5	3	1	4	6	6	7	6	6
4	4	1	4	1	4	5	4	1	1	5	3	2	1	5	3	3	5	1	5	5	2	1	1	1	2	1
3	1	1	1	2	1	2	1	2	2	2	2	1	2	2	4	4	2	2	2	2	2	5	5	6	6	4
3	2	2	2	2	2	1	1	3	2	2	3	3	2	3	4	4	4	3	2	2	3	2	6	6	3	3
3	3	2	3	1	2	2	1	3	3	4	2	1	3	3	4	3	1	2	2	4	3	5	2	3	5	4
4	1	3	1	5	1	1	1	4	4	2	5	1	3	3	5	4	1	5	1	1	3		6	4	6	1
3	2	1	2	2	1	2	1	1	2	1	3	1	2	4	4	3	1	3	2	2	2		1	1	5	1
5	1	3	2	3	2	3	1	4	5	2	4	1	2	2	3	3	1	3	1	2	4	6	7	7	7	6
4	2	5	3	4	3	2	1	5	5	3	4	3	5	2	5	4	2	4	3	2	5	7	6	7	7	7
4	2	4	2	5	1	1	1	5	4	1	3	1	2	4	5	4	2	2	1	1	4	5	6	6	2	5
1	1	1	1	3	1	2	1	1	1	2	2	1	1	2	1	2	1	2	1	1	1	4	5	4	3	3
3	3	1	2	3	4	2	1	2	2	3	3	2	1	2	3	3	2	4	2	2	2	3	3	3	4	3
3	1	3	1	3	1	2	1	3	3	1	4	1	3	3	3	4	2	3	1	1	3	6	5	6	6	3
1	1	1	1	3	1	2	1	1	1	2	2	1	1	2	1	2	1	2	1	1	1	4	5	4	3	3
3	2	3	2	4	2	2	2	3	4	3	4	1	3	2	3	3	2	4	1	2	4	5	5	6	6	3
3	2	3	2	4	2	2	2	3	4	3	4	1	3	2	3	3	2	4	1	2	4	5	5	6	6	3
3	4	3	4	3	4	2	2	4	5	3	4	3	3	4	3	4	4	4	4	3		5	5	5	6	3
3	2	2	2	3	2	2	1	4	1	2	3	2	3	2	4	3	1	3	2	2	3	5	6	6	6	2
4	1	4	3	4	2	2	1	4	4	3	4	2	4	4	5	4	2	4	2	2	4		6	6	6	6
4	2	4	2	2	1	2	1	5	4	2	3	2	4	5	5	4	3	3	2	1	4	6	7	6	3	4
4	1	3	2	4	1	2	2	4	4	2	4	1	4	2	4	4	1	4	1	1	4	6	6	6	6	5
4	3	3	3	3	3	4	1	2	4	4	3	1	3	4	2	3	3	2	2	3	3	6	6	5	5	5
5	3	2	4	3	1	1	1	4	4	3	4	1	4	3	4	4	2	4	1	3	3	5	6	6	5	2
4	2	3	2	3	4	3	1	4	2	2	3	1	4	4	4	4	4	4	2	4	4	6	6	6	6	2
4	2	3	2	3	4	1	2	4	3	3	4	1	1	2	5	4	2	3	1	2	4	5	5	6	5	3
4	2	3	2	3	4	1	2	4	3	3	4	1	1	2	5	4	2	3	1	2	4	5	5	6	5	3
4	1	3	1	4	1	1	1	4	4	2	4	1	3	2	4	4	1	4	1	1	5	7	7	7	7	7
4	1	3	1	4	1	1	1	4	4	2	4	1	3	2	4	4	1	4	1	1	5	7	7	7	7	7
3	1	1	1	3	1	1	1	3	3	2	4	1	4	2	4	4	1	3	1	1	5	6	5	6	6	6
3	1	1	1	3	1	1	1	3	3	2	4	1	4	2	4	4	1	3	1	1	5	6	5	6	6	6
5	1	4	1	5	1	1	1	5	5	1	5	1	5	1	5	5	1	5	1	3	5		7	7	7	7
2	1	3	1	4	1	1	1	3	1	2	3	1	4	3	4	4	2	5	2	1	5	7	7	7	7	6
4	2	3	3	3	1	3	2	3	4	2	4	1	1	1	3	4	1	3	1	3	2	2	6	5	3	1
5	2	2	1	4	3	1	1	4	5	2	5	4		2	4	5	2	4	1	1	3	4	4	4	5	3
3	1	3	1	3	1	1	1	3	3	1	3	1	3	1	3	3	1	3	1	1	3	6	6	6	6	6
4	1	3	2	5	1	1	1	4	3	1	5	2	4	2	4	4	1	5	1	2	5	6	7	6	6	3
3	4	2	2	3	1	2	2	2	1	5	2	2	3	4	4	3	3	3	3	2	3	3	3	4	3	3
5	2	1	2	4	4	2	4	4	4	5	5	4	4	2	5	5	1	5	2	4	2	2	2	2	3	1
4	1	1	1	1	1	1	1	2	3	1	4	1	1	2	4	4	2	1	1	1	3	6	7	6	6	6
3	4	3	2	3	1	3	3	3	4	4	4	1	3	4	3	5	1	2	1	3	3	1	1	2	1	1
4	1	2	2	4	1	1	2	2	4	3	5	1	1	3	4	5	3	2	2	2	5	6	7	7	7	2
4	2	3	2	2	1	1	1	4	2	4	2	2	3	4	4	4	2	2	1	2	5	6	7	7	6	5
4	1	3	1	1	1	1	1	4	2	1	5	1	3	1	4	4	1	3	1	1	5	7	7	6	5	1
4	3	2	2	3	1	3	2	4	3	2	4	2	3	2	4	4	3	4	2	2	4	6	7	6	6	2
3	4	4	4	4	1	2	2	2	3	1	2	1	4	2	4	1	1	3	2	4	5	5	5	6	7	3
3	1	1	2	2	2	3	2	2	2	3	2	2	2	4	4	3	4	2	2	3	2	6	5	6	6	4
4	1	2	2	4	2	1	1	3	3	2	4	1	2	1	3	3	1	4	1	1	4	6	6	6	7	2
1	2	2	1	3	1	2	3	2	3	4	2	1	2	5	3	2	4	3	2	2	3	5	6	3	3	2
4	2	2	2	3	1	2	2	4	3	3	2	1	3	4	3	4	3	3	3	1	3	5	3	5	6	5

## Sheet: Codes
Gender
Birth_Year
Age
Age_Group
Martial_Status
Rural_Status
Rural_Group
Education
Australian_Status
TCI_1
TCI_2
TCI_3
TCI_4
TCI_5
TCI_6
TCI_7
TCI_8
TCI_9
TCI_10
TCI_11
TCI_12
TCI_13
TCI_14
TCI_15
TCI_16
TCI_17
TCI_18
TCI_19
TCI_20
TCI_21
TCI_22
TCI_23
TCI_24
TCI_25
TCI_26
TCI_27
TCI_28
TCI_29
TCI_30
TCI_31
TCI_32
TCI_33
TCI_34
TCI_35
TCI_36
TCI_37
TCI_38
TCI_39
TCI_40
TCI_41
TCI_42
TCI_43
TCI_44
TCI_45
TCI_46
TCI_47
TCI_48
TCI_49
TCI_50
TCI_51
TCI_52
TCI_53
TCI_54
TCI_55
TCI_56
TCI_57
TCI_58
TCI_59
TCI_60
TCI_61
TCI_62
TCI_63
TCI_64
TCI_65
TCI_66
TCI_67
TCI_68
TCI_69
TCI_70
TCI_71
TCI_72
TCI_73
TCI_74
TCI_75
TCI_76
TCI_77
TCI_78
TCI_79
TCI_80
TCI_81
TCI_82
TCI_83
TCI_84
TCI_85
TCI_86
TCI_87
TCI_88
TCI_89
TCI_90
TCI_91
TCI_92
TCI_93
TCI_94
TCI_95
TCI_96
TCI_97
TCI_98
TCI_99
TCI_100
TCI_101
TCI_102
TCI_103
TCI_104
TCI_105
TCI_106
TCI_107
TCI_108
TCI_109
TCI_110
TCI_111
TCI_112
TCI_113
TCI_114
TCI_115
TCI_116
TCI_117
TCI_118
TCI_119
TCI_120
TCI_121
TCI_122
TCI_123
TCI_124
TCI_125
TCI_126
TCI_127
TCI_128
TCI_129
TCI_130
TCI_131
TCI_132
TCI_133
TCI_134
TCI_135
TCI_136
TCI_137
TCI_138
TCI_139
TCI_140
PANAS1
PANAS2
PANAS3
PANAS4
PANAS5
PANAS6
PANAS7
PANAS8
PANAS9
PANAS10
PANAS11
PANAS12
PANAS13
PANAS14
PANAS15
PANAS16
PANAS17
PANAS18
PANAS19
PANAS20
PANAS21
PANAS22
SWL1
SWL2
SWL3
SWL4
SWL5
